# Supplementary material for: PI3K-Yap activity drives cortical gyrification and hydrocephalus in mice
Source: eLife. 2019 May 16;8:e45961. doi: 10.7554/eLife.45961 (PMC6544437; doi:10.7554/eLife.45961)
Supplement: Figure 6—source data 1. — A truncated gene list is shown based on selected parameters (logFC >0.263, FDR < 0.05, true for at least one biological pair comparison). [file elife-45961-fig6-data1.xlsx]

## Sheet: expression analysis
Figure 6 - Source Data 1: Significant gene list and differential expression analysis from P0 Pik3caH1047R mouse RNA-seq data
			Mut-Sulcus-NO-drug_vs_Ctrl-NO-drug					Mut-Gyrus-NO-drug_vs_Ctrl-NO-drug					Mut-Sulcus-NO-drug_vs_Mut-Gyrus-NO-drug					Mut-Gyrus-Drug_vs_Mut-Gyrus-NO-drug					Mut-Sulcus-Drug_vs_Mut-Sulcus-NO-drug					Ctrl-NO-drug_vs_Ctrl-Drug					Mut-Gyrus-Drug_vs_Ctrl-NO-drug					Mut-Sulcus-Drug_vs_Ctrl-NO-drug					Mut-Gyrus-Drug_vs_Mut-Sulcus-Drug					Mut-Gyrus-Drug_vs_Ctrl-Drug
ENTREZID	SYMBOL	GENENAME	Mut-Sulcus-NO-drug_vs_Ctrl-NO-drug_logFC	Mut-Sulcus-NO-drug_vs_Ctrl-NO-drug_unshrunk.logFC	Mut-Sulcus-NO-drug_vs_Ctrl-NO-drug_logCPM	Mut-Sulcus-NO-drug_vs_Ctrl-NO-drug_PValue	Mut-Sulcus-NO-drug_vs_Ctrl-NO-drug_FDR	Mut-Gyrus-NO-drug_vs_Ctrl-NO-drug_logFC	Mut-Gyrus-NO-drug_vs_Ctrl-NO-drug_unshrunk.logFC	Mut-Gyrus-NO-drug_vs_Ctrl-NO-drug_logCPM	Mut-Gyrus-NO-drug_vs_Ctrl-NO-drug_PValue	Mut-Gyrus-NO-drug_vs_Ctrl-NO-drug_FDR	Mut-Sulcus-NO-drug_vs_Mut-Gyrus-NO-drug_logFC	Mut-Sulcus-NO-drug_vs_Mut-Gyrus-NO-drug_unshrunk.logFC	Mut-Sulcus-NO-drug_vs_Mut-Gyrus-NO-drug_logCPM	Mut-Sulcus-NO-drug_vs_Mut-Gyrus-NO-drug_PValue	Mut-Sulcus-NO-drug_vs_Mut-Gyrus-NO-drug_FDR	Mut-Gyrus-Drug_vs_Mut-Gyrus-NO-drug_logFC	Mut-Gyrus-Drug_vs_Mut-Gyrus-NO-drug_unshrunk.logFC	Mut-Gyrus-Drug_vs_Mut-Gyrus-NO-drug_logCPM	Mut-Gyrus-Drug_vs_Mut-Gyrus-NO-drug_PValue	Mut-Gyrus-Drug_vs_Mut-Gyrus-NO-drug_FDR	Mut-Sulcus-Drug_vs_Mut-Sulcus-NO-drug_logFC	Mut-Sulcus-Drug_vs_Mut-Sulcus-NO-drug_unshrunk.logFC	Mut-Sulcus-Drug_vs_Mut-Sulcus-NO-drug_logCPM	Mut-Sulcus-Drug_vs_Mut-Sulcus-NO-drug_PValue	Mut-Sulcus-Drug_vs_Mut-Sulcus-NO-drug_FDR	Ctrl-NO-drug_vs_Ctrl-Drug_logFC	Ctrl-NO-drug_vs_Ctrl-Drug_unshrunk.logFC	Ctrl-NO-drug_vs_Ctrl-Drug_logCPM	Ctrl-NO-drug_vs_Ctrl-Drug_PValue	Ctrl-NO-drug_vs_Ctrl-Drug_FDR	Mut-Gyrus-Drug_vs_Ctrl-NO-drug_logFC	Mut-Gyrus-Drug_vs_ctrl-NO-drug_unshrunk.logFC	Mut-Gyrus-Drug_vs_Ctrl-NO-drug_logCPM	Mut-Gyrus-Drug_vs_Ctrl-NO-drug-4_PValue	Mut-Gyrus-Drug_vs_Ctrl-NO-drug_FDR	Mut-Sulcus-Drug_vs_Ctrl-NO-drug_logFC	Mut-Sulcus-Drug_vs_Ctrl-NO-drug_unshrunk.logFC	Mut-Sulcus-Drug_vs_Ctrl-NO-drug_logCPM	Mut-Sulcus-Drug_vs_Ctrl-NO-drug_PValue	Mut-Sulcus-Drug_vs_Ctrl-NO-drug_FDR	Mut-Gyrus-Drug_vs_Mut-Sulcus-Drug_logFC	Mut-Gyrus-Drug_vs_Mut-Sulcus-Drug_unshrunk.logFC	Mut-Gyrus-Drug_vs_Mut-Sulcus-Drug_logCPM	Mut-Gyrus-Drug_vs_Mut-Sulcus-Drug_PValue	Mut-Gyrus-Drug_vs_Mut-Sulcus-Drug_FDR	Mut-Gyrus-Drug_vs_Ctrl-Drug_logFC	Mut-Gyrus-Drug_vs_Ctrl-Drug_unshrunk.logFC
100034251	Wfdc17	WAP four-disulfide core domain 17	2.49267	2.49757	1.30132	8.89325e-06	0.000272131	1.74312	1.7473	1.30132	0.00059195	0.00744325	0.749551	0.750274	1.30132	0.0935761	0.926135	-1.14978	-1.15197	1.30132	0.014827	0.193709	-1.66754	-1.66988	1.30132	0.000765119	0.0297719	0.983312	0.989314	1.30132	0.0496795	0.554798	0.593339	0.595331	1.30132	0.20043	0.611666	0.825131	0.827693	1.30132	0.0772627	0.342703	-0.231792	-0.232362	1.30132	0.609125	1	1.57665	1.58465
100037258	Dnajc3	DnaJ heat shock protein family (Hsp40) member C3	0.0274597	0.0274612	6.3804	0.974442	1	0.197378	0.197388	6.3804	0.524717	0.835199	-0.169918	-0.169927	6.3804	0.640604	1	-0.0152767	-0.0152774	6.3804	0.986253	1	0.148289	0.148297	6.3804	0.723487	1	0.265703	0.265719	6.3804	0.24055	0.970688	0.182101	0.18211	6.3804	0.59151	0.968468	0.175749	0.175758	6.3804	0.618021	0.953998	0.00635222	0.00635253	6.3804	0.994362	1	0.447804	0.44783
100038347	Fam174b	family with sequence similarity 174, member B	1.02291	1.023	5.79236	3.67488e-09	3.69451e-07	0.935741	0.935825	5.79236	2.09179e-08	1.38538e-06	0.0871692	0.0871747	5.79236	0.850899	1	-0.301726	-0.301747	5.79236	0.145283	0.609448	-0.210851	-0.210865	5.79236	0.437711	1	-0.101468	-0.10148	5.79236	0.81027	1	0.634015	0.634078	5.79236	5.02117e-05	0.00149162	0.812059	0.812135	5.79236	3.91171e-07	2.76089e-05	-0.178044	-0.178057	5.79236	0.564063	1	0.532547	0.532598
100038392	Gm10785	predicted gene 10785	-0.435872	-0.43674	0.85505	0.382838	0.751492	-0.257353	-0.257832	0.85505	0.603614	0.892931	-0.178519	-0.178908	0.85505	0.720916	1	-0.680034	-0.681813	0.85505	0.183089	0.674431	-1.47781	-1.48381	0.85505	0.00794605	0.144291	0.576349	0.577557	0.85505	0.251287	0.982431	-0.937387	-0.939644	0.85505	0.0690624	0.337939	-1.91368	-1.92055	0.85505	0.000949832	0.01589	0.976291	0.980904	0.85505	0.0691387	0.488518	-0.361038	-0.362087
100038492	F630048H11Rik	RIKEN cDNA F630048H11 gene	-1.05395	-1.05489	2.06582	0.00604007	0.0500895	-1.16228	-1.16337	2.06582	0.00285332	0.0248336	0.108333	0.108472	2.06582	0.768669	1	0.190763	0.191004	2.06582	0.602846	1	-0.196965	-0.197239	2.06582	0.593567	1	0.8607	0.861413	2.06582	0.0216546	0.383497	-0.97152	-0.972362	2.06582	0.0102619	0.0925974	-1.25091	-1.25213	2.06582	0.00150273	0.0225456	0.279395	0.279771	2.06582	0.447467	0.999436	-0.110821	-0.110948
100038522	Dnmt3aos	DNA methyltransferase 3A, opposite strand	2.95466	3.21796	-1.35655	0.042207	0.201441	4.28549	4.57003	-1.35655	0.00474037	0.0367726	-1.33083	-1.35208	-1.35655	0.25802	1	-1.32158	-1.34275	-1.35655	0.26117	0.781128	2.61495	2.6444	-1.35655	0.0348691	0.342301	-0.79926	-0.933002	-1.35655	0.59972	1	2.96391	3.22728	-1.35655	0.0416583	0.244352	5.56961	5.86235	-1.35655	0.000608054	0.0112206	-2.6057	-2.63507	-1.35655	0.0354129	0.349405	2.16465	2.29428
100038571	Gm12863	predicted gene 12863	0	0	-2.20146	1	1	6.79325	1.44269e+08	-2.20146	0.00404448	0.0322687	-6.79325	-1.44269e+08	-2.20146	0.00595301	0.287263	-2.64238	-2.71325	-2.20146	0.103889	0.525641	6.01109	1.44269e+08	-2.20146	0.0132241	0.19629	-4.07198	-1.44269e+08	-2.20146	0.0647531	0.628015	4.15087	1.44269e+08	-2.20146	0.0608516	0.312118	6.01109	1.44269e+08	-2.20146	0.0090114	0.0829074	-1.86022	-1.92149	-2.20146	0.240883	0.834995	0.0788848	0.0821578
100038577	Gm10790	predicted gene 10790	-0.916434	-0.919394	-0.120882	0.316005	0.68042	-1.13479	-1.13878	-0.120882	0.219955	0.52357	0.218354	0.219384	-0.120882	0.811387	1	-1.03905	-1.04682	-0.120882	0.276957	0.801566	-3.71135	-3.78512	-0.120882	0.00225509	0.0620359	1.4341	1.43977	-0.120882	0.127588	0.802934	-2.17384	-2.1856	-0.120882	0.0296527	0.194655	-4.62779	-4.70451	-0.120882	0.000320532	0.00670487	2.45395	2.51891	-0.120882	0.0330735	0.338601	-0.739739	-0.745829
100038732	Gm11681	predicted gene 11681	1.68063	1.69905	0.117237	0.0253908	0.142122	2.39284	2.41448	0.117237	0.0024815	0.0224024	-0.712212	-0.715432	0.117237	0.2935	1	-0.0406529	-0.0407834	0.117237	0.951025	1	1.13321	1.13772	0.117237	0.0993462	0.58091	-2.04267	-2.06293	0.117237	0.00782874	0.245381	2.35219	2.3737	0.117237	0.00280568	0.0354395	2.81384	2.83677	0.117237	0.000591258	0.010984	-0.461653	-0.463067	0.117237	0.484907	1	0.309517	0.310767
100038734	Gm10845	predicted gene 10845	-1.00927	-1.00949	4.30789	0.000122381	0.0022867	-0.727148	-0.727295	4.30789	0.00334158	0.0279874	-0.282118	-0.282199	4.30789	0.267139	1	0.203341	0.20339	4.30789	0.426798	0.931826	0.366906	0.367007	4.30789	0.143997	0.683378	0.411517	0.411591	4.30789	0.09488	0.726111	-0.523807	-0.523905	4.30789	0.0323331	0.20628	-0.64236	-0.642487	4.30789	0.00885627	0.0817915	0.118554	0.118582	4.30789	0.646267	1	-0.11229	-0.112314
100038746	Gm1976	predicted gene 1976	0.712951	0.713191	3.74113	0.00196717	0.0210415	0.564946	0.565146	3.74113	0.0140355	0.0822273	0.148005	0.148045	3.74113	0.556168	1	-0.336954	-0.337064	3.74113	0.157588	0.635124	-0.584726	-0.584913	3.74113	0.0109496	0.175176	-0.475328	-0.475501	3.74113	0.0403794	0.509392	0.227992	0.228082	3.74113	0.354317	0.803299	0.128225	0.128278	3.74113	0.612184	0.95071	0.0997672	0.0998043	3.74113	0.694945	1	-0.247336	-0.247418
100038882	Isg15	ISG15 ubiquitin-like modifier	2.46241	2.47678	0.512564	0.000123902	0.00231288	2.48552	2.49994	0.512564	0.000111461	0.00194018	-0.0231116	-0.0231615	0.512564	0.964066	1	-0.631168	-0.632896	0.512564	0.228905	0.741467	0.0248212	0.0248765	0.512564	0.961349	1	-0.740502	-0.747509	0.512564	0.188009	0.908492	1.85435	1.86705	0.512564	0.00206321	0.0279415	2.48723	2.50166	0.512564	0.00010906	0.00285787	-0.632878	-0.634611	0.512564	0.22704	0.818461	1.11385	1.11954
100038909	Gm14548	predicted gene 14548	6.2133	1.44269e+08	-2.34372	0.00186393	0.0202622	2.51576	1.44269e+08	-2.34372	0.163836	0.437718	3.69753	3.95575	-2.34372	0.0210109	0.544269	3.14449	3.39351	-2.34372	0.0457788	0.352716	-0.600819	-0.610697	-2.34372	0.624514	1	-1.03776	-1.44269e+08	-2.34372	0.470577	1	5.66025	1.44269e+08	-2.34372	0.00384461	0.0447131	5.61248	1.44269e+08	-2.34372	0.00402264	0.0465274	0.047776	0.0484599	-2.34372	0.969267	1	4.62249	5.54349
100039138	Gm2061	predicted gene 2061	-0.859983	-0.860535	2.76608	0.00272513	0.0272042	-0.97851	-0.979168	2.76608	0.000886954	0.0101647	0.118527	0.118633	2.76608	0.672926	1	0.443664	0.444017	2.76608	0.110913	0.540158	0.0679676	0.0680184	2.76608	0.808232	1	0.0259001	0.0259126	2.76608	0.924977	1	-0.534846	-0.535151	2.76608	0.051372	0.280249	-0.792015	-0.792517	2.76608	0.00512901	0.0555686	0.257169	0.257366	2.76608	0.354107	0.938735	-0.508946	-0.509238
100039192	Tmem254c	transmembrane protein 254c	-0.656738	-0.656832	4.85377	0.242517	0.588808	-1.7071	-1.70747	4.85377	0.00597866	0.0437297	1.05036	1.05064	4.85377	0.0774585	0.870913	0.885753	0.885999	4.85377	0.133947	0.590822	0.811748	0.811858	4.85377	0.152286	0.697718	0.331652	0.331694	4.85377	0.548553	1	-0.821343	-0.821468	4.85377	0.148446	0.525113	0.15501	0.155026	4.85377	0.777456	1	-0.976353	-0.976495	4.85377	0.0892052	0.552938	-0.489691	-0.489775
100039332	Gm2164	predicted gene 2164	-1.62226	-1.62652	0.832943	0.00507604	0.0440271	-0.628315	-0.629448	0.832943	0.240341	0.552933	-0.993942	-0.997077	0.832943	0.0740994	0.858603	-0.108719	-0.108947	0.832943	0.838044	1	0.788872	0.791426	0.832943	0.154622	0.70061	0.88801	0.88973	0.832943	0.10001	0.743024	-0.737034	-0.738395	0.832943	0.166853	0.556006	-0.833385	-0.835099	0.832943	0.126397	0.454123	0.0963506	0.0967039	0.832943	0.857212	1	0.150976	0.151335
100039636	Atp6v0c-ps2	ATPase, H+ transporting, lysosomal V0 subunit C, pseudogene 2	0.446986	0.446991	8.79013	0.00031184	0.00498403	0.49563	0.495635	8.79013	3.25004e-05	0.000694503	-0.0486438	-0.0486442	8.79013	0.992184	1	-0.204066	-0.204068	8.79013	0.608099	1	0.0835798	0.0835806	8.79013	0.97655	1	-0.155097	-0.155099	8.79013	0.845291	1	0.291564	0.291568	8.79013	0.127273	0.483182	0.530566	0.530572	8.79013	6.41288e-06	0.000295088	-0.239002	-0.239004	8.79013	0.388397	0.96326	0.136468	0.136469
100039939	Gm2506	predicted gene 2506	-1.09588	-1.09676	2.40049	0.00395707	0.0364062	-0.590755	-0.591143	2.40049	0.101557	0.321759	-0.50513	-0.505615	2.40049	0.167186	1	-0.0415127	-0.0415457	2.40049	0.906858	1	0.137564	0.137706	2.40049	0.703129	1	1.0594	1.06023	2.40049	0.00503141	0.191364	-0.632267	-0.632689	2.40049	0.0807176	0.374088	-0.95832	-0.959051	2.40049	0.0102121	0.0903436	0.326053	0.326363	2.40049	0.364392	0.945903	0.427135	0.427542
100040294	Gm2694	predicted gene 2694	0.472222	0.475992	-1.07263	0.624992	0.928967	-0.00988495	-0.00961671	-1.07263	0.992124	1	0.482107	0.485609	-1.07263	0.616391	1	-0.404829	-0.409109	-1.07263	0.674686	1	0.302341	0.304155	-1.07263	0.750468	1	3.30578	3.42483	-1.07263	0.00647146	0.218675	-0.414714	-0.418726	-1.07263	0.669072	1	0.774563	0.780147	-1.07263	0.422472	0.825344	-1.18928	-1.19887	-1.07263	0.223778	0.813705	2.89106	3.00611
100040328	Gm2716	predicted gene 2716	1.80172	1.89191	-1.15595	0.105111	0.359713	4.10887	4.22635	-1.15595	0.000918739	0.0104453	-2.30715	-2.33445	-1.15595	0.0269624	0.614888	-0.285704	-0.287203	-1.15595	0.756688	1	1.04587	1.06368	-1.15595	0.289752	0.888459	-0.427833	-0.463464	-1.15595	0.704286	1	3.82317	3.93915	-1.15595	0.00166313	0.0239667	2.84759	2.95559	-1.15595	0.0129083	0.106727	0.975577	0.983564	-1.15595	0.303694	0.895337	3.39534	3.47569
100040525	Tmem181c-ps	transmembrane protein 181C, pseudogene	3.72334	3.82859	-1.04212	0.00104664	0.0131692	2.92073	3.01974	-1.04212	0.00686876	0.0486932	0.802612	0.808849	-1.04212	0.362112	1	0.672941	0.67839	-1.04212	0.442821	0.943683	-1.07465	-1.08404	-1.04212	0.228642	0.816105	-2.11055	-2.1986	-1.04212	0.0423566	0.519426	3.59367	3.69813	-1.04212	0.00139645	0.0211149	2.64869	2.74455	-1.04212	0.0128451	0.106523	0.944983	0.953581	-1.04212	0.287088	0.881633	1.48312	1.49952
100040591	Kcnj13	potassium inwardly-rectifying channel, subfamily J, member 13	-2.23295	-2.23736	1.61353	4.27704e-05	0.000975396	-1.0913	-1.09264	1.61353	0.018322	0.0995226	-1.14165	-1.14472	1.61353	0.0187564	0.523034	-0.214828	-0.215236	1.61353	0.632676	1	1.64376	1.64757	1.61353	0.00120203	0.0403578	0.702542	0.703289	1.61353	0.115038	0.77519	-1.30613	-1.30788	1.61353	0.00576851	0.0604974	-0.589191	-0.589792	1.61353	0.182338	0.556713	-0.716938	-0.718084	1.61353	0.113469	0.610504	-0.603587	-0.604587
100040792	Gm11627	predicted gene 11627	-0.755938	-0.756146	3.91526	0.00229667	0.0237515	-0.761124	-0.761335	3.91526	0.00215463	0.0202011	0.00518654	0.00518898	3.91526	0.98411	1	-0.305696	-0.305817	3.91526	0.227036	0.739787	0.0203536	0.0203606	3.91526	0.937617	1	-0.0613623	-0.0613749	3.91526	0.812072	1	-1.06682	-1.06715	3.91526	5.76206e-05	0.00166169	-0.735584	-0.735785	3.91526	0.00286327	0.0364534	-0.331237	-0.331367	3.91526	0.18832	0.764468	-1.12818	-1.12853
100040822	Gm1604a	predicted gene 1604A	-1.0085	-1.00978	1.8534	0.00465623	0.0413438	-1.02054	-1.02183	1.8534	0.0041887	0.0332534	0.0120347	0.012056	1.8534	0.971699	1	-0.0163479	-0.0163804	1.8534	0.961524	1	0.154911	0.155174	1.8534	0.647341	1	-0.237958	-0.238149	1.8534	0.467937	1	-1.03689	-1.03821	1.8534	0.00372321	0.043958	-0.853591	-0.854605	1.8534	0.0145685	0.116518	-0.183294	-0.18361	1.8534	0.588439	1	-1.27484	-1.27636
100040852	Gm3002	alpha-takusan pseudogene	-1.16685	-1.16736	3.05175	4.47987e-05	0.00101567	-0.946468	-0.946844	3.05175	0.000532868	0.00685984	-0.220383	-0.220512	3.05175	0.407292	1	-0.101076	-0.101132	3.05175	0.705007	1	-0.751414	-0.75203	3.05175	0.00565005	0.115748	1.17878	1.17929	3.05175	3.822e-05	0.0085946	-1.04754	-1.04798	3.05175	0.000168596	0.00394254	-1.91827	-1.91938	3.05175	1.98507e-08	2.19367e-06	0.870721	0.871409	3.05175	0.00157629	0.0547777	0.131236	0.131315
100041420	Gm3325	predicted gene 3325	-0.0315468	-0.0315523	4.60585	0.914668	1	-0.581888	-0.58201	4.60585	0.0527865	0.206647	0.550342	0.550458	4.60585	0.0675951	0.828405	1.28977	1.28999	4.60585	9.64177e-05	0.00658877	-0.80963	-0.809821	4.60585	0.00934054	0.159203	0.218267	0.218307	4.60585	0.458692	1	0.707885	0.707981	4.60585	0.0180218	0.137485	-0.841177	-0.841374	4.60585	0.00694924	0.0684694	1.54906	1.54935	4.60585	8.60033e-06	0.00144628	0.926153	0.926288
100041515	Gm3383	predicted gene 3383	-0.321314	-0.321506	2.41656	0.418141	0.782748	-0.437736	-0.43801	2.41656	0.272393	0.591424	0.116422	0.116504	2.41656	0.770853	1	-0.998152	-0.999186	2.41656	0.0180519	0.216432	-0.921898	-0.92275	2.41656	0.02742	0.297928	1.04823	1.04905	2.41656	0.0123169	0.299617	-1.43589	-1.4372	2.41656	0.00108945	0.0174423	-1.24321	-1.24426	2.41656	0.00372041	0.0440346	-0.192676	-0.19294	2.41656	0.63814	1	-0.387656	-0.388145
100041530	Gm10409	predicted pseudogene 8348	2.38687	2.39595	0.389091	0.00140618	0.0164315	1.43551	1.44259	0.389091	0.0382556	0.166778	0.951356	0.953365	0.389091	0.145679	1	-0.864357	-0.867765	0.389091	0.193408	0.691583	-1.50658	-1.51053	0.389091	0.0273154	0.297608	-0.140612	-0.141656	0.389091	0.834371	1	0.571155	0.574824	0.389091	0.393555	0.835176	0.880292	0.885421	0.389091	0.191588	0.572663	-0.309137	-0.310598	0.389091	0.637891	1	0.430544	0.433168
100041677	Zfp984	zinc finger protein 984	0.560864	0.561081	3.75431	0.0473282	0.216737	0.456957	0.45714	3.75431	0.105081	0.32915	0.103908	0.103942	3.75431	0.712139	1	0.574641	0.574801	3.75431	0.0404067	0.331112	-0.780177	-0.780504	3.75431	0.00736522	0.137332	-0.759834	-0.76011	3.75431	0.00823056	0.250663	1.0316	1.03194	3.75431	0.000585103	0.0107662	-0.219313	-0.219423	3.75431	0.43916	0.839886	1.25091	1.25136	3.75431	6.34082e-05	0.00549889	0.271763	0.271831
100041734	4930522L14Rik	RIKEN cDNA 4930522L14 gene	-0.514118	-0.51416	5.57232	0.0230084	0.132745	-1.0957	-1.09582	5.57232	8.72642e-06	0.000229294	0.581587	0.581656	5.57232	0.0106577	0.407331	0.783093	0.783181	5.57232	0.000645313	0.0254169	-0.335647	-0.335684	5.57232	0.155729	0.702315	0.214234	0.21425	5.57232	0.382211	1	-0.312611	-0.312635	5.57232	0.186198	0.588958	-0.849765	-0.849844	5.57232	0.000227058	0.0051178	0.537154	0.537209	5.57232	0.017756	0.237542	-0.0983776	-0.0983857
100041979	Gm3604	predicted gene 3604	0.553617	0.554408	1.87915	0.23402	0.576892	-0.0226588	-0.0227092	1.87915	0.961116	1	0.576276	0.577117	1.87915	0.219792	1	1.41275	1.41434	1.87915	0.00442087	0.0923226	0.113759	0.113892	1.87915	0.803014	1	0.414242	0.415096	1.87915	0.378606	1	1.39009	1.39163	1.87915	0.00467057	0.0519403	0.667375	0.6683	1.87915	0.151471	0.503056	0.722714	0.723333	1.87915	0.116096	0.616808	1.80433	1.80673
100042008	Gm9794	predicted pseudogene 9794	0.620512	0.620602	4.98605	0.00988272	0.0723398	0.668023	0.668119	4.98605	0.00554697	0.0414982	-0.0475111	-0.0475166	4.98605	0.853665	1	-0.233889	-0.233918	4.98605	0.350356	0.872889	-0.386483	-0.386535	4.98605	0.113121	0.615545	-0.171168	-0.171197	4.98605	0.500497	1	0.434134	0.434201	4.98605	0.0734545	0.351444	0.234029	0.234068	4.98605	0.351114	0.761232	0.200105	0.200133	4.98605	0.42789	0.990073	0.262965	0.263004
100042025	Gapdh-ps15	glyceraldehyde-3-phosphate dehydrogenase, pseudogene 15	0.2482	0.248252	4.47083	0.298786	0.660647	0.181089	0.181128	4.47083	0.464158	0.785469	0.0671115	0.0671248	4.47083	0.795671	1	0.0119713	0.0119738	4.47083	0.963474	1	0.340432	0.34049	4.47083	0.135728	0.669007	0.124051	0.124081	4.47083	0.625201	1	0.19306	0.193101	4.47083	0.432316	0.869344	0.588633	0.588743	4.47083	0.00600299	0.0616199	-0.395572	-0.395641	4.47083	0.0764551	0.514105	0.317111	0.317182
100042149	Gm3696	predicted gene 3696	0.722647	0.722892	3.5611	0.0129252	0.0882006	-0.0517754	-0.0517981	3.5611	0.85687	1	0.774423	0.77469	3.5611	0.00861834	0.362326	0.688185	0.688429	3.5611	0.0180875	0.216517	-0.991151	-0.991522	3.5611	0.00119461	0.0402482	0.258124	0.258245	3.5611	0.368642	1	0.63641	0.63663	3.5611	0.0268967	0.181936	-0.268504	-0.26863	3.5611	0.349382	0.759863	0.904914	0.905261	3.5611	0.00269668	0.0784226	0.894533	0.894876
100042150	Nrg2	neuregulin 2	0.802426	0.803269	2.17935	0.0428271	0.203248	0.496463	0.497031	2.17935	0.203179	0.500057	0.305963	0.306238	2.17935	0.432547	1	0.151363	0.151512	2.17935	0.695158	1	0.401611	0.401884	2.17935	0.300174	0.89789	0.0421401	0.0421902	2.17935	0.913101	1	0.647826	0.648543	2.17935	0.0972324	0.4164	1.20404	1.20515	2.17935	0.00329386	0.0402607	-0.556211	-0.556611	2.17935	0.151951	0.696181	0.689967	0.690733
100042165	BC005561	cDNA sequence BC005561	-0.781199	-0.781263	5.50166	1.11465e-05	0.000327435	-0.741058	-0.741118	5.50166	2.74824e-05	0.000599191	-0.0401401	-0.0401443	5.50166	0.906734	1	-0.276678	-0.27671	5.50166	0.218059	0.726323	0.036761	0.0367647	5.50166	0.914982	1	0.806932	0.806999	5.50166	6.22905e-06	0.0021134	-1.01774	-1.01783	5.50166	9.70823e-08	7.36265e-06	-0.744438	-0.744498	5.50166	2.50721e-05	0.000882099	-0.273299	-0.27333	5.50166	0.226139	0.817748	-0.210804	-0.210829
100042178	Gm13111	predicted gene 13111	-1.30475	-1.30499	4.44596	3.37077e-08	2.54638e-06	-1.45994	-1.46022	4.44596	3.83669e-09	3.25429e-07	0.155182	0.155228	4.44596	0.539269	1	0.159136	0.159183	4.44596	0.528149	0.994618	-0.0315646	-0.0315739	4.44596	0.906627	1	0.374302	0.374351	4.44596	0.0823016	0.686048	-1.3008	-1.30104	4.44596	3.38235e-08	3.15996e-06	-1.33632	-1.33657	4.44596	1.97899e-08	2.19367e-06	0.0355183	0.0355284	4.44596	0.89509	1	-0.926498	-0.926688
100042237	Gm3740	predicted gene 3740	-1.65999	-1.66948	-0.185206	0.023632	0.135406	-3.00258	-3.03378	-0.185206	0.000508598	0.00661896	1.34259	1.3643	-0.185206	0.0853515	0.900498	2.84055	2.87124	-0.185206	0.000864825	0.0316155	-0.0894103	-0.0902431	-0.185206	0.899229	1	0.710283	0.713076	-0.185206	0.296288	1	-0.162022	-0.162542	-0.185206	0.807815	1	-1.7494	-1.75972	-0.185206	0.0177459	0.133433	1.58738	1.59718	-0.185206	0.029803	0.31923	0.548261	0.550533
100042277	Gm3764	predicted gene 3764	-0.576463	-0.576473	8.00483	0.00176534	0.0193885	-0.186457	-0.18646	8.00483	0.471733	0.791569	-0.390006	-0.390014	8.00483	0.0519968	0.774541	-0.359671	-0.359678	8.00483	0.0807412	0.47	0.294371	0.294377	8.00483	0.182762	0.74914	0.0437252	0.0437258	8.00483	0.890494	1	-0.546128	-0.546138	8.00483	0.00324148	0.0396251	-0.282092	-0.282097	8.00483	0.208559	0.599006	-0.264036	-0.264041	8.00483	0.250707	0.847331	-0.502403	-0.502412
100042332	2810410L24Rik	RIKEN cDNA 2810410L24 gene	0.176793	0.17691	2.48133	0.558868	0.888697	-1.09037	-1.09152	2.48133	0.00113578	0.0123537	1.26717	1.26843	2.48133	0.000238097	0.0343624	0.952188	0.953234	2.48133	0.00401771	0.0874983	-0.385598	-0.385876	2.48133	0.207023	0.785023	0.0883999	0.0884637	2.48133	0.770331	1	-0.138186	-0.138288	2.48133	0.64863	0.991818	-0.208805	-0.208966	2.48133	0.491417	0.877679	0.070619	0.0706785	2.48133	0.816818	1	-0.049786	-0.0498241
100042484	4732419C18Rik	RIKEN cDNA 4732419C18 gene	-0.986524	-0.987502	1.89951	0.0069656	0.0558953	-1.14449	-1.1457	1.89951	0.00219831	0.0205377	0.157968	0.158197	1.89951	0.652823	1	0.115007	0.115176	1.89951	0.74277	1	-0.207796	-0.208103	1.89951	0.554046	1	0.871799	0.87263	1.89951	0.0155697	0.332235	-1.02949	-1.03052	1.89951	0.00502394	0.0546138	-1.19432	-1.19561	1.89951	0.00148417	0.022319	0.164834	0.165082	1.89951	0.638	1	-0.157687	-0.157893
100042498	Mir22hg	Mir22 host gene (non-protein coding)	1.56405	1.56484	3.30471	1.62365e-06	6.58275e-05	1.61782	1.61862	3.30471	9.41427e-07	3.45261e-05	-0.0537631	-0.0537777	3.30471	0.843987	1	-1.06116	-1.06158	3.30471	0.000309945	0.0150251	-1.0266	-1.02702	3.30471	0.000451547	0.020308	-0.2172	-0.217369	3.30471	0.435459	1	0.556655	0.557035	3.30471	0.0450142	0.257401	0.537455	0.537823	3.30471	0.0526293	0.271028	0.0192005	0.0192121	3.30471	0.944805	1	0.339455	0.339666
100042584	Gm16523	mitochondrial ribosomal protein L40 pseudogene	-1.68392	-1.68917	0.745567	0.00344912	0.0327133	-1.02044	-1.02289	0.745567	0.0566485	0.216866	-0.663483	-0.666288	0.745567	0.220052	1	0.8535	0.855659	0.745567	0.107879	0.533345	0.724191	0.727204	0.745567	0.179927	0.745352	1.49865	1.50299	0.745567	0.00757911	0.241869	-0.166936	-0.167227	0.745567	0.742428	1	-0.959728	-0.96197	0.745567	0.0705298	0.325847	0.792792	0.794743	0.745567	0.132141	0.655589	1.33172	1.33577
100042940	Gm4117	predicted gene 4117	-1.36631	-1.36847	1.36374	0.00526163	0.0452847	-0.643072	-0.643837	1.36374	0.158399	0.427772	-0.72324	-0.724633	1.36374	0.122349	0.984675	-0.431857	-0.432604	1.36374	0.344887	0.870158	-0.773307	-0.775756	1.36374	0.108438	0.604836	0.981161	0.982484	1.36374	0.0358557	0.483213	-1.07493	-1.07644	1.36374	0.022473	0.160135	-2.13962	-2.14423	1.36374	8.86485e-05	0.00244213	1.06469	1.06779	1.36374	0.0287772	0.31442	-0.093769	-0.0939565
100043143	Gm4258	predicted gene 4258	-1.41434	-1.41729	0.797094	0.0101906	0.0739811	-2.01114	-2.01652	0.797094	0.000703832	0.00849817	0.5968	0.599232	0.797094	0.266569	1	1.04238	1.04607	0.797094	0.0557287	0.390202	-0.198694	-0.199362	0.797094	0.702991	1	1.52442	1.52775	0.797094	0.00607425	0.211388	-0.968758	-0.970457	0.797094	0.0647612	0.323789	-1.61303	-1.61665	0.797094	0.00387539	0.0454219	0.644271	0.646197	0.797094	0.217165	0.802551	0.555657	0.557292
100043229	Gm10046	predicted gene 10046	-0.416485	-0.416779	2.78706	0.135803	0.424143	-0.57075	-0.571174	2.78706	0.0425556	0.178909	0.154265	0.154395	2.78706	0.585713	1	-0.141923	-0.142059	2.78706	0.617058	1	0.881661	0.882197	2.78706	0.00251268	0.0676779	-0.316282	-0.316455	2.78706	0.252602	0.983122	-0.712673	-0.713233	2.78706	0.0126075	0.107314	0.465176	0.465418	2.78706	0.0917721	0.37877	-1.17785	-1.17865	2.78706	0.00012849	0.0094842	-1.02896	-1.02969
100043232	3110099E03Rik	RIKEN cDNA 3110099E03 gene	-0.276056	-0.276172	3.1728	0.305511	0.668206	-1.08853	-1.08915	3.1728	0.000218231	0.00332313	0.81247	0.812974	3.1728	0.00395996	0.219796	-0.0910776	-0.0911536	3.1728	0.743048	1	-0.195199	-0.195295	3.1728	0.472769	1	-0.287931	-0.288031	3.1728	0.282178	1	-1.1796	-1.1803	3.1728	7.69943e-05	0.00211804	-0.471255	-0.471467	3.1728	0.0788636	0.346264	-0.708349	-0.708833	3.1728	0.0105624	0.176243	-1.46753	-1.46833
100043314	Tigit	T cell immunoreceptor with Ig and ITIM domains	-2.15621	-2.16548	0.221903	0.00489632	0.0429044	-1.68176	-1.6877	0.221903	0.0209484	0.109552	-0.474458	-0.477786	0.221903	0.503284	1	0.575433	0.578275	0.221903	0.40719	0.915479	0.228362	0.230123	0.221903	0.746882	1	1.06546	1.06839	0.221903	0.122788	0.790212	-1.10632	-1.10942	0.221903	0.110434	0.447078	-1.92785	-1.93536	0.221903	0.00966489	0.0869222	0.821529	0.825938	0.221903	0.241988	0.836128	-0.0408642	-0.0410294
100043324	Bnip3l-ps	BCL2/adenovirus E1B interacting protein 3-like, pseudogene	-0.0651894	-0.0652119	3.60682	0.916767	1	-1.24723	-1.24792	3.60682	0.0626667	0.233284	1.18204	1.18271	3.60682	0.0781161	0.875761	2.66845	2.66946	3.60682	0.000403794	0.0180346	-4.79427	-4.80876	3.60682	8.66047e-06	0.00107324	0.641851	0.642136	3.60682	0.314487	1	1.42123	1.42154	3.60682	0.029044	0.19216	-4.85946	-4.87397	3.60682	6.84868e-06	0.000312374	6.28068	6.29551	3.60682	1.56181e-07	0.000100679	2.06308	2.06368
100043450	AA387883	expressed sequence AA387883	-0.685571	-0.686292	1.99791	0.0499173	0.223979	-0.97954	-0.98069	1.99791	0.00659104	0.0472439	0.293969	0.294398	1.99791	0.39503	1	0.310729	0.311179	1.99791	0.36826	0.886456	-0.110268	-0.110415	1.99791	0.746943	1	-0.0703734	-0.0704308	1.99791	0.832537	1	-0.668811	-0.669511	1.99791	0.0549104	0.291654	-0.795839	-0.796708	1.99791	0.0239374	0.163877	0.127028	0.127197	1.99791	0.709748	1	-0.739184	-0.739942
100043468	Zfp955b	zinc finger protein 955B	-0.112785	-0.112803	4.74064	0.658283	0.946117	-0.519766	-0.51986	4.74064	0.0176709	0.0968545	0.406981	0.407057	4.74064	0.0710525	0.842671	0.619892	0.619999	4.74064	0.00434739	0.0916839	-0.640704	-0.640834	4.74064	0.00336467	0.0820573	-0.0894707	-0.0894834	4.74064	0.728092	1	0.100126	0.10014	4.74064	0.696288	1	-0.753489	-0.753637	4.74064	0.000584851	0.0108859	0.853615	0.853776	4.74064	0.00012749	0.0094465	0.010655	0.0106565
100043597	Srcap	Snf2-related CREBBP activator protein	-0.210533	-0.210582	4.59955	0.411202	0.775452	0.0792102	0.0792269	4.59955	0.823938	1	-0.289744	-0.289809	4.59955	0.184891	1	0.842339	0.842469	4.59955	1.34809e-06	0.000314104	0.712064	0.712204	4.59955	3.2083e-05	0.00287247	0.207458	0.207506	4.59955	0.42184	1	0.92155	0.921696	4.59955	2.31575e-07	1.6071e-05	0.501531	0.501622	4.59955	0.0042002	0.0479785	0.420019	0.420074	4.59955	0.0223064	0.273455	1.12901	1.1292
100043682	Gm10584	predicted gene 10584	5.37984	5.87498	-0.942732	0.000745546	0.0100702	5.46848	5.96421	-0.942732	0.000639649	0.00788914	-0.0886428	-0.089228	-0.942732	0.930984	1	-0.842507	-0.850257	-0.942732	0.422189	0.927886	0.598027	0.601492	-0.942732	0.558718	1	-3.60381	-4.07399	-0.942732	0.0167937	0.343312	4.62598	5.11395	-0.942732	0.00281459	0.0355064	5.97787	6.47647	-0.942732	0.000270981	0.00590447	-1.35189	-1.36252	-0.942732	0.203005	0.784867	1.02217	1.03996
100044068	LOC100044068	interferon-activable protein 202-like	8.10223	1.44269e+08	-0.812775	8.74881e-05	0.00175694	8.0899	1.44269e+08	-0.812775	8.92978e-05	0.00162259	0.0123246	0.0123802	-0.812775	0.990488	1	-2.07012	-2.08718	-0.812775	0.0689516	0.434307	-1.31541	-1.32331	-0.812775	0.22398	0.810333	-3.30123	-1.44269e+08	-0.812775	0.0862579	0.699702	6.01979	1.44269e+08	-0.812775	0.00180378	0.0254437	6.78682	1.44269e+08	-0.812775	0.000571229	0.0107461	-0.767031	-0.776253	-0.812775	0.481523	1	2.71856	2.85708
100045125	Gm17768	predicted gene, 17768	3.29702	3.64621	-0.637261	0.0603961	0.253307	2.45684	2.77758	-0.637261	0.17146	0.449852	0.840181	0.868632	-0.637261	0.560535	1	4.39079	4.45151	-0.637261	0.00522437	0.101849	1.30532	1.32656	-0.637261	0.325028	0.921101	-4.10547	-4.47003	-0.637261	0.0194102	0.367954	6.84763	7.22908	-0.637261	0.000440583	0.00861156	4.60234	4.97277	-0.637261	0.00951698	0.086049	2.2453	2.25632	-0.637261	0.083342	0.538927	2.74216	2.75905
100045469	Gm14204	predicted gene 14204	-0.167121	-0.167146	4.60918	0.512272	0.854393	-0.375622	-0.375682	4.60918	0.0781218	0.269711	0.208501	0.208536	4.60918	0.393685	1	-0.151664	-0.151693	4.60918	0.555976	1	-0.728453	-0.728601	4.60918	0.000267136	0.0138132	0.47054	0.470617	4.60918	0.0208918	0.378214	-0.527286	-0.527375	4.60918	0.00854118	0.0814486	-0.895575	-0.895747	4.60918	1.24735e-05	0.000512247	0.368289	0.368372	4.60918	0.087956	0.549549	-0.0567465	-0.0567576
100048534	Cfap43	cilia and flagella associated protein 43	-0.983731	-0.984387	2.91262	0.00126842	0.0152076	-0.180919	-0.181009	2.91262	0.522385	0.833179	-0.802812	-0.803378	2.91262	0.00699195	0.313729	0.0608732	0.0609049	2.91262	0.830104	1	0.739203	0.739734	2.91262	0.0121351	0.187595	0.764034	0.7645	2.91262	0.00890946	0.258321	-0.120046	-0.120104	2.91262	0.670671	1	-0.244528	-0.244652	2.91262	0.38668	0.795194	0.124482	0.124548	2.91262	0.660534	1	0.643988	0.644396
100088	Rcc1	regulator of chromosome condensation 1	0.310466	0.310494	5.77574	0.134697	0.422364	0.454116	0.454155	5.77574	0.00907133	0.0598028	-0.143649	-0.14366	5.77574	0.658726	1	-0.238542	-0.238561	5.77574	0.326635	0.853851	0.371511	0.371537	5.77574	0.0488702	0.416527	-0.22261	-0.222631	5.77574	0.380471	1	0.215574	0.215594	5.77574	0.40487	0.845683	0.681977	0.682032	5.77574	3.01862e-05	0.00102416	-0.466403	-0.466438	5.77574	0.00682939	0.136018	-0.00703654	-0.0070372
100101806	Srp54c	signal recognition particle 54C	0.220259	0.220269	6.59066	0.391873	0.758983	-0.103144	-0.103149	6.59066	0.787995	0.987048	0.323404	0.323419	6.59066	0.108923	0.959668	0.25339	0.253402	6.59066	0.279892	0.80552	-0.465842	-0.465864	6.59066	0.00641992	0.126302	-0.262059	-0.26207	6.59066	0.253403	0.98313	0.150246	0.150253	6.59066	0.644656	0.991248	-0.245582	-0.245595	6.59066	0.304828	0.717214	0.395828	0.395848	6.59066	0.0294653	0.317667	-0.111813	-0.111817
100169871	Gm10910	predicted gene 10910	-1.03218	-1.03502	0.541318	0.0547799	0.237691	-1.95603	-1.96387	0.541318	0.00109561	0.0119842	0.923849	0.928844	0.541318	0.0956248	0.929977	0.834297	0.838942	0.541318	0.13027	0.584078	0.740902	0.743143	0.541318	0.162448	0.711078	1.00139	1.00411	0.541318	0.0612213	0.615683	-1.12173	-1.12493	0.541318	0.0381379	0.230484	-0.291275	-0.291881	0.541318	0.569739	0.928159	-0.830454	-0.833045	0.541318	0.119187	0.625499	-0.120336	-0.120815
100169874	Gm11110	predicted gene 11110	0.144493	0.144594	2.90843	0.580339	0.90262	-0.169134	-0.169267	2.90843	0.517438	0.828921	0.313627	0.313861	2.90843	0.224675	1	0.827789	0.828311	2.90843	0.00149659	0.0459405	0.239358	0.239503	2.90843	0.354677	0.949429	-0.719477	-0.719895	2.90843	0.00467108	0.184837	0.658654	0.659044	2.90843	0.0093014	0.0865222	0.38385	0.384097	2.90843	0.131012	0.463388	0.274804	0.274946	2.90843	0.28389	0.880896	-0.0608227	-0.0608509
100177	Zmym6	zinc finger, MYM-type 6	-0.885421	-0.88571	3.78311	9.32755e-05	0.00183879	-0.64571	-0.645903	3.78311	0.00323575	0.0272897	-0.239711	-0.239807	3.78311	0.322158	1	0.203893	0.203963	3.78311	0.405749	0.914224	0.18412	0.184195	3.78311	0.456816	1	0.178449	0.178494	3.78311	0.471295	1	-0.441817	-0.441939	3.78311	0.0479052	0.267912	-0.701301	-0.701515	3.78311	0.00140163	0.0212598	0.259484	0.259575	3.78311	0.278509	0.876772	-0.263368	-0.263445
100210	Gpn2	GPN-loop GTPase 2	0.372233	0.37228	5.28639	0.048082	0.218636	0.58708	0.587149	5.28639	0.000339672	0.00475664	-0.214847	-0.214869	5.28639	0.40884	1	-0.0438536	-0.0438578	5.28639	0.92113	1	0.0262081	0.0262109	5.28639	0.953658	1	-0.0222677	-0.0222707	5.28639	0.96031	1	0.543226	0.543291	5.28639	0.0010471	0.0169313	0.398441	0.398491	5.28639	0.0289032	0.184414	0.144785	0.1448	5.28639	0.657857	1	0.520959	0.52102
100213	Rusc2	RUN and SH3 domain containing 2	0.461659	0.46168	6.72976	0.0191926	0.117226	0.729429	0.729459	6.72976	0.000119306	0.00205102	-0.26777	-0.267779	6.72976	0.24357	1	-0.270512	-0.270522	6.72976	0.237275	0.751992	-0.189907	-0.189915	6.72976	0.453221	1	0.0365315	0.0365334	6.72976	0.902349	1	0.458916	0.458937	6.72976	0.020042	0.147879	0.271752	0.271765	6.72976	0.234624	0.634156	0.187164	0.187172	6.72976	0.461474	1	0.495448	0.495471
100302688	Gm17455	predicted gene, 17455	-0.860913	-0.861006	5.46171	4.04542e-07	2.0588e-05	-0.597449	-0.597508	5.46171	0.000272093	0.0039894	-0.263464	-0.263499	5.46171	0.249417	1	0.273781	0.273811	5.46171	0.220556	0.730366	0.694355	0.694434	5.46171	2.50104e-05	0.00237096	0.221456	0.221475	5.46171	0.385541	1	-0.323668	-0.323697	5.46171	0.109753	0.445812	-0.166559	-0.166573	5.46171	0.583132	0.933851	-0.15711	-0.157124	5.46171	0.613851	1	-0.102212	-0.102222
100310809	Gm10509	predicted gene 10509	0.587074	0.587178	4.7837	0.0140721	0.093648	0.110611	0.110634	4.7837	0.665939	0.930025	0.476463	0.476543	4.7837	0.0481107	0.757075	0.936795	0.936932	4.7837	0.000174094	0.010141	-0.65429	-0.654409	4.7837	0.00652841	0.127916	-0.390899	-0.390973	4.7837	0.107668	0.760756	1.04741	1.04757	4.7837	4.28863e-05	0.00131023	-0.0672167	-0.0672314	4.7837	0.793982	1	1.11462	1.1148	4.7837	1.88978e-05	0.00253794	0.656507	0.656593
100316903	Gm20605	predicted gene 20605	-0.640848	-0.641059	3.7663	0.0281191	0.152238	0.0895298	0.0895526	3.7663	0.753657	0.974704	-0.730378	-0.730611	3.7663	0.0135387	0.464199	-0.489867	-0.49001	3.7663	0.0891855	0.488835	0.469946	0.470109	3.7663	0.10461	0.5941	1.08917	1.08959	3.7663	0.000512651	0.0492345	-0.400337	-0.400457	3.7663	0.16242	0.549793	-0.170902	-0.170949	3.7663	0.549297	0.916217	-0.229435	-0.229508	3.7663	0.424733	0.988817	0.688831	0.689134
100316932	Snora28	small nucleolar RNA, H/ACA box 28	-2.84739	-2.87022	-0.347798	0.00594991	0.0495289	-1.43476	-1.441	-0.347798	0.115686	0.349759	-1.41263	-1.42922	-0.347798	0.141601	1	-0.164498	-0.165697	-0.347798	0.854397	1	0.70767	0.71816	-0.347798	0.456013	1	1.6998	1.70809	-0.347798	0.0675964	0.639453	-1.59926	-1.6067	-0.347798	0.0830768	0.379547	-2.13972	-2.15206	-0.347798	0.026363	0.174388	0.540461	0.545368	-0.347798	0.55368	1	0.100538	0.101389
100340	Smpdl3b	sphingomyelin phosphodiesterase, acid-like 3B	0.848611	0.849186	2.86306	0.00320813	0.03099	0.572495	0.572918	2.86306	0.0402676	0.172287	0.276117	0.276267	2.86306	0.31809	1	-0.424115	-0.424413	2.86306	0.128012	0.580226	0.177823	0.177906	2.86306	0.519396	1	-0.476339	-0.476703	2.86306	0.0864784	0.700319	0.14838	0.148506	2.86306	0.59645	0.970445	1.02643	1.02709	2.86306	0.000535693	0.0102318	-0.878054	-0.878586	2.86306	0.00244863	0.0735312	-0.327959	-0.328198
100416706	Zfp729b	zinc finger protein 729b	0.178058	0.178096	4.53708	0.477117	0.82933	0.104392	0.104415	4.53708	0.681781	0.938899	0.0736658	0.073681	4.53708	0.773345	1	0.556984	0.55708	4.53708	0.0164528	0.205794	-0.257102	-0.257158	4.53708	0.29555	0.893207	-0.303851	-0.303913	4.53708	0.209212	0.935698	0.661376	0.661495	4.53708	0.00424605	0.0482175	-0.0790444	-0.0790627	4.53708	0.757087	1	0.740421	0.740557	4.53708	0.00153774	0.0539716	0.357525	0.357582
100502766	Kifc1	kinesin family member C1	0.696295	0.697135	2.11665	0.0542123	0.236025	0.367884	0.368378	2.11665	0.30004	0.622984	0.328411	0.328757	2.11665	0.352043	1	0.416994	0.41742	2.11665	0.239051	0.754654	0.368364	0.368669	2.11665	0.290655	0.888721	-0.195526	-0.195797	2.11665	0.578959	1	0.784878	0.785798	2.11665	0.0307989	0.19943	1.06466	1.0658	2.11665	0.00416022	0.0476344	-0.279782	-0.280006	2.11665	0.419534	0.984321	0.589352	0.590001
100502849	Gm19412	predicted gene, 19412	-0.710396	-0.710693	3.36509	0.00721785	0.0574192	-0.229833	-0.229914	3.36509	0.382863	0.712352	-0.480563	-0.480779	3.36509	0.0673426	0.828249	-0.53422	-0.534466	3.36509	0.0420182	0.339145	-0.110898	-0.11096	3.36509	0.679947	1	0.155974	0.156028	3.36509	0.555514	1	-0.764053	-0.76438	3.36509	0.00409245	0.0468862	-0.821294	-0.821654	3.36509	0.0022529	0.0306822	0.0572405	0.0572737	3.36509	0.831623	1	-0.608079	-0.608352
100502982	BC037704	cDNA sequence BC037704	-0.451024	-0.451708	1.52554	0.247528	0.595788	-1.1365	-1.13874	1.52554	0.00624374	0.0451731	0.685478	0.687035	1.52554	0.0898834	0.915353	0.65748	0.658986	1.52554	0.102766	0.52286	0.484261	0.484988	1.52554	0.216222	0.798762	-0.0470143	-0.0470768	1.52554	0.902107	1	-0.479022	-0.479757	1.52554	0.219177	0.641931	0.0332378	0.0332791	1.52554	0.93074	1	-0.51226	-0.513036	1.52554	0.190674	0.767348	-0.526037	-0.526834
100503043	Armcx4	armadillo repeat containing, X-linked 4	0.109031	0.109058	4.26439	0.667479	0.950679	0.0365481	0.0365576	4.26439	0.886965	1	0.0724824	0.0725007	4.26439	0.776826	1	0.838655	0.838821	4.26439	0.000244766	0.0127245	-0.0419829	-0.0419933	4.26439	0.870183	1	0.0250436	0.0250503	4.26439	0.922444	1	0.875203	0.875378	4.26439	0.000137549	0.00333341	0.0670476	0.067065	4.26439	0.79347	1	0.808155	0.808313	4.26439	0.000371825	0.0197684	0.900247	0.900429
100503099	Gm19554	predicted gene, 19554	-1.04127	-1.04203	2.79196	0.000326197	0.0052006	-1.36299	-1.3641	2.79196	1.06325e-05	0.000267388	0.321711	0.322076	2.79196	0.243873	1	0.63774	0.638394	2.79196	0.02121	0.237648	0.450431	0.450827	2.79196	0.0972324	0.575743	-0.551558	-0.551784	2.79196	0.0370324	0.488187	-0.725246	-0.72571	2.79196	0.00768848	0.0748679	-0.590843	-0.591201	2.79196	0.027374	0.178245	-0.134403	-0.134509	2.79196	0.621894	1	-1.2768	-1.27749
100503311	Pifo	primary cilia formation	-0.3003	-0.300352	4.87486	0.154544	0.456086	0.466762	0.466824	4.87486	0.00606811	0.0441522	-0.767062	-0.767176	4.87486	3.03628e-06	0.00151056	0.00741125	0.00741205	4.87486	0.987734	1	0.0489539	0.0489633	4.87486	0.910218	1	0.2847	0.284749	4.87486	0.191093	0.913482	0.474173	0.474236	4.87486	0.00508893	0.0551344	-0.251346	-0.251389	4.87486	0.286148	0.695823	0.725519	0.725625	4.87486	8.30427e-06	0.00140874	0.758873	0.758985
100503338	Gm14636	predicted gene 14636	-0.934865	-0.939917	-0.404875	0.327303	0.693896	-3.70067	-3.76804	-0.404875	0.00235305	0.0215463	2.7658	2.82812	-0.404875	0.0175182	0.515653	3.07465	3.13905	-0.404875	0.00887105	0.140736	0.414737	0.417476	-0.404875	0.661986	1	0.856535	0.860878	-0.404875	0.363476	1	-0.626014	-0.62899	-0.404875	0.502443	0.919449	-0.520127	-0.522441	-0.404875	0.575606	0.930428	-0.105886	-0.106549	-0.404875	0.909617	1	0.230521	0.231888
100503427	Gm10390	predicted gene 10390	-5.44878	-6.40712	-1.89551	0.0058845	0.049179	-1.83248	-1.87517	-1.89551	0.181136	0.466754	-3.6163	-4.53195	-1.89551	0.0629676	0.808213	0.985448	1.01489	-1.89551	0.469595	0.957459	4.57025	5.51445	-1.89551	0.0190267	0.244003	0.679281	0.689218	-1.89551	0.594507	1	-0.847032	-0.860287	-1.89551	0.510637	0.925164	-0.878532	-0.892673	-1.89551	0.495366	0.880342	0.0315	0.0323859	-1.89551	0.980601	1	-0.167751	-0.171069
100503704	Gm16861	predicted gene, 16861	0.0496754	0.0497299	1.95078	0.901921	1	0.159771	0.159943	1.95078	0.691417	0.944702	-0.110095	-0.110213	1.95078	0.785353	1	-1.03415	-1.0357	1.95078	0.0161576	0.203831	-0.206	-0.206246	1.95078	0.611842	1	-0.366232	-0.366601	1.95078	0.363051	1	-0.874384	-0.875755	1.95078	0.0386973	0.233136	-0.156324	-0.156516	1.95078	0.698619	0.991967	-0.718059	-0.71924	1.95078	0.0879466	0.549549	-1.24062	-1.24236
100503754	Gm11725	predicted gene 11725	-2.96017	-2.99068	-1.89112	0.0979969	0.344012	-6.36698	-6.66336	-1.89112	0.00373154	0.0303977	3.40681	3.67267	-1.89112	0.0949306	0.92861	2.61761	2.86618	-1.89112	0.178545	0.668321	1.51098	1.5354	-1.89112	0.371498	0.960901	4.19112	4.2532	-1.89112	0.0212408	0.380803	-3.74937	-3.79717	-1.89112	0.038003	0.230028	-1.44919	-1.45528	-1.89112	0.356147	0.765348	-2.30018	-2.34189	-1.89112	0.169784	0.732423	0.441753	0.456022
100503799	Gm7931	non-histone chromosomal protein HMG-17-like	0.244475	0.244478	8.3708	0.329696	0.696448	0.0788789	0.07888	8.3708	0.934824	1	0.165596	0.165598	8.3708	0.701181	1	0.191722	0.191725	8.3708	0.584545	1	-0.273365	-0.273368	8.3708	0.210508	0.791102	0.244482	0.244486	8.3708	0.329573	1	0.270601	0.270605	8.3708	0.220669	0.644462	-0.02889	-0.0288904	8.3708	0.983089	1	0.299491	0.299495	8.3708	0.128518	0.647075	0.515083	0.51509
100503812	3300002A11Rik	RIKEN cDNA 3300002A11 gene	-0.665178	-0.66707	0.778179	0.286488	0.644821	0.333667	0.33433	0.778179	0.583391	0.878935	-0.998845	-1.0014	0.778179	0.115663	0.976344	-0.0649167	-0.0650343	0.778179	0.914867	1	-0.062695	-0.062938	0.778179	0.920203	1	1.6967	1.7038	0.778179	0.0127283	0.303518	0.26875	0.269296	0.778179	0.658449	0.995507	-0.727873	-0.730008	0.778179	0.244479	0.647207	0.996624	0.999304	0.778179	0.11643	0.618026	1.96545	1.9731
100503849	Sp3os	trans-acting transcription factor 3, opposite strand	-0.01631	-0.0163147	3.89216	0.949924	1	-0.0173623	-0.0173672	3.89216	0.946694	1	0.0010523	0.00105251	3.89216	0.996765	1	-0.452532	-0.452684	3.89216	0.0431941	0.343899	-0.413546	-0.413683	3.89216	0.0674851	0.491376	-0.314205	-0.314284	3.89216	0.176438	0.891597	-0.469895	-0.470051	3.89216	0.0345012	0.215719	-0.429856	-0.429998	3.89216	0.0555599	0.279665	-0.0400385	-0.0400532	3.89216	0.876756	1	-0.784099	-0.784335
100503859	1110015O18Rik	RIKEN cDNA 1110015O18 gene	-1.26361	-1.26389	4.10534	0.000198178	0.0034342	-1.46852	-1.46887	4.10534	3.11624e-05	0.000669611	0.204909	0.204981	4.10534	0.509585	1	0.490755	0.490914	4.10534	0.114842	0.550005	-0.326631	-0.326754	4.10534	0.291551	0.889602	0.333136	0.333187	4.10534	0.267493	0.996423	-0.977763	-0.977958	4.10534	0.00246417	0.0321556	-1.59024	-1.59064	4.10534	9.46883e-06	0.000413358	0.612477	0.612686	4.10534	0.0498975	0.417735	-0.644627	-0.644771
100503868	Gm19935	predicted gene, 19935	-0.746833	-0.747174	3.41767	0.00328583	0.0315671	-0.114583	-0.114624	3.41767	0.658499	0.925997	-0.63225	-0.632549	3.41767	0.0122962	0.446146	0.155006	0.155061	3.41767	0.548777	1	0.443635	0.443857	3.41767	0.0793347	0.527598	0.537138	0.537364	3.41767	0.0313835	0.454491	0.0404228	0.0404369	3.41767	0.876647	1	-0.303198	-0.303316	3.41767	0.231384	0.630689	0.343621	0.343753	3.41767	0.173785	0.740898	0.577561	0.577801
100503901	Gm19950	predicted gene, 19950	-0.949152	-0.949325	4.48283	4.04824e-05	0.000937931	-1.0165	-1.01668	4.48283	1.67606e-05	0.000391464	0.0673432	0.0673604	4.48283	0.792634	1	0.709058	0.709204	4.48283	0.00145027	0.0449467	-0.205808	-0.205862	4.48283	0.402475	0.980717	0.695214	0.695329	4.48283	0.00160118	0.100536	-0.307437	-0.307481	4.48283	0.189236	0.594675	-1.15496	-1.15519	4.48283	2.35454e-06	0.000126485	0.847523	0.847706	4.48283	0.00018657	0.0121984	0.387777	0.387848
100504061	8030451A03Rik	RIKEN cDNA 8030451A03 gene	-2.8852	-2.89543	0.797673	6.74969e-06	0.000215045	-1.87959	-1.88387	0.797673	0.000641269	0.00790408	-1.00562	-1.01156	0.797673	0.0582107	0.798816	0.327384	0.32858	0.797673	0.508396	0.984334	1.32324	1.33036	0.797673	0.0142387	0.205956	1.36271	1.36521	0.797673	0.00794187	0.246854	-1.5522	-1.55529	0.797673	0.00315496	0.0387389	-1.56196	-1.56507	0.797673	0.00298952	0.0375662	0.0097552	0.00978004	0.797673	0.984084	1	-0.189489	-0.190077
100504141	Gm20083	predicted gene, 20083	-1.20142	-1.20287	2.11642	0.00044825	0.00668366	-0.696987	-0.69768	2.11642	0.0279038	0.1346	-0.504433	-0.50519	2.11642	0.113717	0.974382	-0.060605	-0.0606818	2.11642	0.845171	1	0.949627	0.950863	2.11642	0.00429825	0.0966556	-0.013597	-0.0136071	2.11642	0.964294	1	-0.757592	-0.758362	2.11642	0.0174313	0.134091	-0.251793	-0.252007	2.11642	0.409175	0.81465	-0.505799	-0.506355	2.11642	0.104841	0.591663	-0.771189	-0.771969
100504156	Fam181a	family with sequence similarity 181, member A	-0.652234	-0.652372	4.40105	0.0011244	0.01393	-0.620467	-0.620597	4.40105	0.00193948	0.0187351	-0.0317663	-0.0317744	4.40105	0.907481	1	0.0207301	0.0207355	4.40105	0.939741	1	0.461596	0.4617	4.40105	0.0260952	0.289415	0.0190967	0.0190999	4.40105	0.945524	1	-0.599737	-0.599862	4.40105	0.00278763	0.0353674	-0.190638	-0.190672	4.40105	0.442916	0.841525	-0.409099	-0.40919	4.40105	0.0535129	0.433369	-0.58064	-0.580762
100504234	Ccdc170	coiled-coil domain containing 170	-0.821559	-0.822363	2.35154	0.0115129	0.08104	-0.0466891	-0.0467243	2.35154	0.878562	1	-0.77487	-0.775639	2.35154	0.0169305	0.513195	0.235386	0.235549	2.35154	0.442029	0.943662	0.294439	0.294783	2.35154	0.346816	0.93973	0.717256	0.717927	2.35154	0.0244774	0.409604	0.188697	0.188824	2.35154	0.535484	0.940922	-0.52712	-0.52758	2.35154	0.0905099	0.375801	0.715817	0.716405	2.35154	0.0242615	0.286271	0.905953	0.906751
100504361	Gm14230	predicted gene 14230	-0.404065	-0.40413	4.67506	0.0656568	0.267369	-0.667228	-0.667348	4.67506	0.00155559	0.0157505	0.263164	0.263217	4.67506	0.265209	1	-0.0897446	-0.0897652	4.67506	0.72841	1	0.00768835	0.00768948	4.67506	0.976777	1	-0.228612	-0.228642	4.67506	0.341526	1	-0.756973	-0.757113	4.67506	0.000357693	0.00735115	-0.396376	-0.396441	4.67506	0.0714972	0.327904	-0.360597	-0.360672	4.67506	0.108526	0.600311	-0.985585	-0.985755
100504455	Gm15834	predicted gene 15834	-1.16009	-1.1614	1.58631	0.0284983	0.15378	-1.71245	-1.71485	1.58631	0.00246346	0.0223178	0.552354	0.553452	1.58631	0.292397	1	0.573702	0.574806	1.58631	0.275245	0.799437	-0.520327	-0.521318	1.58631	0.317259	0.914184	1.15216	1.15346	1.58631	0.0294171	0.44086	-1.13875	-1.14005	1.58631	0.0314759	0.202567	-1.68042	-1.68272	1.58631	0.00270711	0.0348786	0.541675	0.542671	1.58631	0.298914	0.890939	0.0134175	0.0134125
100504663	Atg14	autophagy related 14	-0.281558	-0.281608	4.59919	0.206269	0.539158	-0.398902	-0.398976	4.59919	0.0397243	0.171021	0.117344	0.117368	4.59919	0.698604	1	0.013292	0.0132948	4.59919	0.969228	1	-0.0463362	-0.0463454	4.59919	0.891477	1	-0.183349	-0.183376	4.59919	0.494251	1	-0.38561	-0.385681	4.59919	0.0492588	0.27305	-0.327894	-0.327953	4.59919	0.116134	0.432508	-0.0577162	-0.0577279	4.59919	0.863119	1	-0.568959	-0.569057
100505034	Gm29695	predicted gene, 29695	-0.660529	-0.661612	1.91759	0.0468047	0.215257	0.310816	0.311179	1.91759	0.327906	0.654672	-0.971345	-0.972791	1.91759	0.00473248	0.244747	-0.251039	-0.251325	1.91759	0.429729	0.934958	1.24746	1.24917	1.91759	0.00044925	0.0202519	-0.165319	-0.165525	1.91759	0.601653	1	0.0597769	0.059854	1.91759	0.850426	1	0.586935	0.587559	1.91759	0.0683545	0.31933	-0.527158	-0.527705	1.91759	0.100686	0.582435	-0.105542	-0.105671
100515	Zfp518b	zinc finger protein 518B	0.153545	0.15359	4.21181	0.539698	0.874726	0.229028	0.229093	4.21181	0.344214	0.672061	-0.0754821	-0.0755024	4.21181	0.76895	1	0.473427	0.473533	4.21181	0.0322256	0.2955	0.456253	0.456361	4.21181	0.0401178	0.369976	-0.352382	-0.352478	4.21181	0.124584	0.79252	0.702454	0.702625	4.21181	0.00124223	0.0192651	0.609798	0.609951	4.21181	0.00503492	0.0546411	0.092656	0.0926744	4.21181	0.718173	1	0.350073	0.350147
100526469	Mir3064	microRNA 3064	-2.06404	-2.07008	0.425851	0.0023166	0.0238882	-1.22246	-1.22499	0.425851	0.0486277	0.195512	-0.841585	-0.84509	0.425851	0.176739	1	-0.76822	-0.771334	0.425851	0.216384	0.723285	-0.268863	-0.27051	0.425851	0.666573	1	3.4923	3.51194	0.425851	1.86055e-05	0.00492894	-1.99068	-1.99632	0.425851	0.00309707	0.0382222	-2.33291	-2.34059	0.425851	0.000856178	0.0146221	0.342229	0.344266	0.425851	0.584266	1	1.50162	1.51561
100532	Rell1	RELT-like 1	0.239312	0.239361	4.65471	0.318569	0.683699	0.440056	0.440139	4.65471	0.0171262	0.0949008	-0.200744	-0.200778	4.65471	0.440904	1	0.0143337	0.014336	4.65471	0.969462	1	0.416355	0.416422	4.65471	0.0265412	0.293087	0.00897213	0.00897401	4.65471	0.980602	1	0.45439	0.454475	4.65471	0.012844	0.108562	0.655668	0.655783	4.65471	0.000141442	0.00351137	-0.201278	-0.201308	4.65471	0.44085	0.996413	0.463362	0.463449
100604	Lrrc8c	leucine rich repeat containing 8 family, member C	-0.370638	-0.370683	5.39839	0.0645482	0.263465	-0.412238	-0.412288	5.39839	0.0332236	0.151858	0.0415998	0.0416055	5.39839	0.899468	1	0.534075	0.534137	5.39839	0.00333629	0.0783162	0.743998	0.744076	5.39839	3.29324e-05	0.00291426	-0.121375	-0.121388	5.39839	0.686875	1	0.121837	0.121849	5.39839	0.685828	1	0.373359	0.373394	5.39839	0.0604865	0.297165	-0.251522	-0.251544	5.39839	0.282592	0.880182	0.000461554	0.000461509
100608	Noc4l	NOC4 like	0.260314	0.26033	6.18141	0.258945	0.609559	0.486016	0.486046	6.18141	0.00256768	0.0229992	-0.225703	-0.225715	6.18141	0.381889	1	-0.242834	-0.242848	6.18141	0.318642	0.848556	0.0151203	0.0151211	6.18141	0.979135	1	0.0177486	0.0177499	6.18141	0.975265	1	0.243182	0.243198	6.18141	0.317317	0.765066	0.275434	0.275451	6.18141	0.21238	0.604598	-0.0322515	-0.0322534	6.18141	0.954393	1	0.260931	0.260948
100616095	Snhg18	small nucleolar RNA host gene 18	-0.36249	-0.362635	3.52667	0.119299	0.390309	-0.371494	-0.371643	3.52667	0.109336	0.337718	0.00900393	0.00900831	3.52667	0.97209	1	-0.252366	-0.252491	3.52667	0.298147	0.824638	0.334669	0.334803	3.52667	0.154573	0.70061	-0.370564	-0.370678	3.52667	0.10823	0.761159	-0.623861	-0.624134	3.52667	0.00543065	0.0578621	-0.0278216	-0.0278319	3.52667	0.914058	1	-0.596039	-0.596302	3.52667	0.00809028	0.150257	-0.994425	-0.994812
100637	N4bp2l1	NEDD4 binding protein 2-like 1	-0.927932	-0.928009	5.3848	0.0717789	0.281854	-0.79025	-0.790312	5.3848	0.121015	0.360048	-0.137682	-0.137697	5.3848	0.784698	1	-0.951238	-0.951375	5.3848	0.070602	0.439994	-0.892168	-0.892306	5.3848	0.0898077	0.558721	0.584991	0.585034	5.3848	0.244729	0.97427	-1.74149	-1.74169	5.3848	0.00194751	0.0269406	-1.8201	-1.82031	5.3848	0.00135109	0.0206316	0.078612	0.0786275	5.3848	0.879139	1	-1.1565	-1.15665
100675	AI480526	expressed sequence AI480526	-0.956792	-0.958254	1.35091	0.0198542	0.119875	-1.23949	-1.2416	1.35091	0.00353217	0.0292667	0.282698	0.283348	1.35091	0.484434	1	-0.0297501	-0.0298251	1.35091	0.941399	1	0.513462	0.514368	1.35091	0.200853	0.77844	0.891757	0.893094	1.35091	0.0286051	0.436152	-1.26924	-1.27143	1.35091	0.00289881	0.0363083	-0.44333	-0.443887	1.35091	0.260566	0.666722	-0.82591	-0.82754	1.35091	0.0440065	0.392005	-0.377482	-0.378333
100678	Psph	phosphoserine phosphatase	-0.15696	-0.156967	6.73512	0.66968	0.951779	-0.151745	-0.151751	6.73512	0.68884	0.943354	-0.00521516	-0.00521539	6.73512	0.994134	1	-0.161448	-0.161456	6.73512	0.651316	1	0.0188339	0.0188347	6.73512	0.978586	1	-0.218074	-0.218082	6.73512	0.42272	1	-0.313194	-0.313207	6.73512	0.113586	0.453547	-0.138126	-0.138132	6.73512	0.736163	1	-0.175067	-0.175075	6.73512	0.598708	1	-0.531268	-0.531289
100683	Trrap	transformation/transcription domain-associated protein	-0.403985	-0.404014	6.05462	0.0116485	0.081679	-0.177346	-0.177358	6.05462	0.621804	0.904412	-0.226639	-0.226656	6.05462	0.399342	1	0.155064	0.155075	6.05462	0.71033	1	0.478076	0.478109	6.05462	0.00127562	0.0419543	0.132579	0.132588	6.05462	0.789392	1	-0.022282	-0.0222834	6.05462	0.982133	1	0.0740906	0.0740951	6.05462	0.923705	1	-0.0963726	-0.0963785	6.05462	0.882752	1	0.110297	0.110304
100715	Papd4	PAP associated domain containing 4	-0.152682	-0.15269	6.11043	0.565384	0.893224	-0.590381	-0.59042	6.11043	0.00199276	0.01905	0.437699	0.43773	6.11043	0.0292039	0.637209	0.420243	0.420272	6.11043	0.0379217	0.321371	-0.343313	-0.343336	6.11043	0.10806	0.604062	0.156424	0.156433	6.11043	0.554184	1	-0.170138	-0.170148	6.11043	0.51251	0.92608	-0.495994	-0.496026	6.11043	0.0109948	0.0951357	0.325856	0.325878	6.11043	0.132828	0.657276	-0.0137142	-0.013715
100764	Rita1	RBPJ interacting and tubulin associated 1	-0.00395262	-0.0039535	4.10366	0.988116	1	0.620898	0.621041	4.10366	0.00279233	0.0244237	-0.62485	-0.624995	4.10366	0.002742	0.179754	-0.385752	-0.385833	4.10366	0.0789237	0.465905	-0.0060433	-0.00604424	4.10366	0.981879	1	0.0911603	0.0911871	4.10366	0.726522	1	0.235146	0.235208	4.10366	0.325689	0.773676	-0.00999592	-0.00999775	4.10366	0.97008	1	0.245142	0.245205	4.10366	0.302597	0.894625	0.326306	0.326395
100855	Tbc1d14	TBC1 domain family, member 14	0.427457	0.427475	6.761	0.00561971	0.0475621	0.393638	0.393655	6.761	0.0148669	0.0855433	0.0338186	0.0338199	6.761	0.972586	1	0.00701696	0.00701722	6.761	0.994671	1	-0.284789	-0.2848	6.761	0.176191	0.741696	-0.252868	-0.25288	6.761	0.289432	1	0.400655	0.400672	6.761	0.0122063	0.104822	0.142668	0.142675	6.761	0.758855	1	0.257987	0.257998	6.761	0.269215	0.867179	0.147787	0.147792
100861531	Rn45s	45S pre-ribosomal RNA	0.358056	0.358056	11.2208	0.0271037	0.148655	0.121979	0.121979	11.2208	0.870537	1	0.236077	0.236078	11.2208	0.376382	1	-0.0123371	-0.0123371	11.2208	0.994939	1	0.221498	0.221498	11.2208	0.451445	1	-0.051204	-0.0512041	11.2208	0.974022	1	0.109642	0.109642	11.2208	0.898578	1	0.579554	0.579555	11.2208	9.42375e-06	0.000412321	-0.469912	-0.469913	11.2208	0.000604328	0.0280266	0.0584376	0.0584377
100862203	Gm6712	predicted gene 6712	-0.03366	-0.0336668	4.37258	0.900477	1	-0.179532	-0.179571	4.37258	0.503286	0.817678	0.145872	0.145904	4.37258	0.588215	1	0.480974	0.481068	4.37258	0.0688597	0.434307	-0.782789	-0.783006	4.37258	0.00438582	0.0981684	0.0663232	0.0663368	4.37258	0.805208	1	0.301442	0.301497	4.37258	0.254227	0.691978	-0.816449	-0.816673	4.37258	0.00300374	0.037647	1.11789	1.11817	4.37258	0.000119024	0.0089914	0.367765	0.367834
100862375	Entpd4b	ectonucleoside triphosphate diphosphohydrolase 4B	0.572905	0.573003	4.80715	0.00237453	0.0243742	0.675076	0.675188	4.80715	0.000304465	0.00436152	-0.102171	-0.102185	4.80715	0.722854	1	-0.267311	-0.267349	4.80715	0.243864	0.760546	-0.0369092	-0.0369145	4.80715	0.90393	1	-0.0881297	-0.0881477	4.80715	0.761278	1	0.407765	0.407838	4.80715	0.0429917	0.249375	0.535995	0.536088	4.80715	0.00476688	0.0524384	-0.128231	-0.12825	4.80715	0.644463	1	0.319635	0.319691
100910	Chpf2	chondroitin polymerizing factor 2	0.395489	0.395529	5.55873	0.040976	0.197368	0.418817	0.418859	5.55873	0.0273103	0.132536	-0.023328	-0.02333	5.55873	0.947697	1	-0.237887	-0.23791	5.55873	0.321685	0.850553	0.178273	0.178288	5.55873	0.511601	1	-0.23985	-0.239875	5.55873	0.316056	1	0.18093	0.180949	5.55873	0.50178	0.918852	0.573762	0.573817	5.55873	0.00114359	0.0182023	-0.392833	-0.392868	5.55873	0.0428158	0.387732	-0.0589202	-0.0589262
100952	Emilin1	elastin microfibril interfacer 1	1.07138	1.07181	3.68095	9.08728e-05	0.00180245	0.978129	0.978535	3.68095	0.000271948	0.0039894	0.0932479	0.0932742	3.68095	0.721118	1	-0.471277	-0.471438	3.68095	0.0630194	0.416661	-0.269562	-0.269642	3.68095	0.293444	0.890864	-0.803154	-0.803506	3.68095	0.00194294	0.114907	0.506853	0.507097	3.68095	0.0468976	0.264541	0.801816	0.802167	3.68095	0.00198789	0.0280407	-0.294963	-0.29507	3.68095	0.251271	0.847901	-0.296301	-0.296409
101023	Zfp513	zinc finger protein 513	0.457416	0.457476	5.24254	0.0121042	0.0840929	0.712325	0.712413	5.24254	3.6906e-05	0.000770762	-0.25491	-0.254936	5.24254	0.273654	1	-0.232154	-0.232178	5.24254	0.340996	0.867586	-0.0603908	-0.0603977	5.24254	0.86595	1	-0.379863	-0.379915	5.24254	0.0504215	0.555291	0.480172	0.480235	5.24254	0.00761156	0.0743416	0.397025	0.397079	5.24254	0.0375393	0.218018	0.083147	0.0831564	5.24254	0.808824	1	0.100309	0.10032
101055656	LOC101055656	uncharacterized LOC101055656	-0.883762	-0.885511	1.01071	0.0552531	0.238833	-1.56669	-1.57075	1.01071	0.00174766	0.0172049	0.682928	0.685242	1.01071	0.145454	1	0.964882	0.967874	1.01071	0.0418314	0.338343	-0.254257	-0.254971	1.01071	0.57674	1	0.360021	0.360605	1.01071	0.418282	1	-0.601808	-0.602878	1.01071	0.180592	0.580821	-1.13802	-1.14048	1.01071	0.015861	0.123684	0.536211	0.537604	1.01071	0.239253	0.831879	-0.241787	-0.242273
101055907	Gm15246	predicted gene 15246	-0.684335	-0.685096	1.78439	0.125683	0.403751	-0.886801	-0.887861	1.78439	0.0511481	0.202405	0.202467	0.202765	1.78439	0.650551	1	0.963469	0.964595	1.78439	0.0355019	0.309444	-0.730941	-0.732239	1.78439	0.110649	0.609111	1.24914	1.25086	1.78439	0.00807806	0.24778	0.076668	0.076734	1.78439	0.859802	1	-1.41528	-1.41734	1.78439	0.003263	0.0399893	1.49194	1.49407	1.78439	0.00214994	0.0675964	1.32581	1.32759
101056094	Gm21811	predicted gene, 21811	-0.212266	-0.212268	9.11017	0.585756	0.905777	-0.325511	-0.325514	9.11017	0.0382176	0.166725	0.113245	0.113246	9.11017	0.962077	1	0.245949	0.245951	9.11017	0.355081	0.875804	-0.141157	-0.141158	9.11017	0.914404	1	-0.0862489	-0.0862495	9.11017	0.984094	1	-0.0795623	-0.0795629	9.11017	0.987264	1	-0.353423	-0.353426	9.11017	0.0125541	0.104648	0.273861	0.273863	9.11017	0.192995	0.770663	-0.165811	-0.165812
101214	Tra2a	transformer 2 alpha	-0.307051	-0.307093	5.04258	0.153355	0.454033	-0.758583	-0.758704	5.04258	2.40869e-05	0.000537273	0.451532	0.451611	5.04258	0.0170494	0.513821	0.973669	0.973814	5.04258	3.07085e-07	0.000116446	0.195198	0.195225	5.04258	0.45149	1	0.0731633	0.0731726	5.04258	0.824596	1	0.215086	0.21511	5.04258	0.390406	0.831963	-0.111853	-0.111867	5.04258	0.717136	0.999435	0.326939	0.326978	5.04258	0.118334	0.622348	0.288249	0.288283
101490	Inpp5f	inositol polyphosphate-5-phosphatase F	0.658206	0.65823	7.02142	4.35228e-06	0.000151929	0.514018	0.514037	7.02142	0.000463142	0.00614314	0.144188	0.144192	7.02142	0.742493	1	0.0198707	0.0198713	7.02142	0.982645	1	-0.42699	-0.427004	7.02142	0.00658682	0.128466	-0.168042	-0.168049	7.02142	0.651858	1	0.533889	0.533908	7.02142	0.000242509	0.00533547	0.231217	0.231226	7.02142	0.377191	0.786299	0.302672	0.302683	7.02142	0.130047	0.650724	0.365847	0.36586
101502	Hsd3b7	hydroxy-delta-5-steroid dehydrogenase, 3 beta- and steroid delta-isomerase 7	0.121499	0.121513	5.19086	0.736723	0.98469	-0.222071	-0.2221	5.19086	0.384736	0.713725	0.34357	0.343612	5.19086	0.0785929	0.877557	-0.30712	-0.307167	5.19086	0.140858	0.602132	-0.243282	-0.243311	5.19086	0.312216	0.909247	-0.372235	-0.372274	5.19086	0.0459534	0.537804	-0.529191	-0.529267	5.19086	0.00143309	0.0215342	-0.121784	-0.121798	5.19086	0.735405	1	-0.407408	-0.407468	5.19086	0.0240661	0.285538	-0.901427	-0.90154
101543	Wtip	WT1-interacting protein	0.333027	0.333076	5.02705	0.218674	0.556585	0.813547	0.813649	5.02705	0.00338837	0.028228	-0.48052	-0.480573	5.02705	0.0750386	0.862253	-0.854349	-0.854457	5.02705	0.00232886	0.0621773	-0.0716088	-0.0716181	5.02705	0.793304	1	-0.458428	-0.458493	5.02705	0.0895966	0.709354	-0.0408023	-0.0408086	5.02705	0.881513	1	0.261418	0.261457	5.02705	0.33471	0.746895	-0.30222	-0.302266	5.02705	0.265261	0.861819	-0.499231	-0.499302
101565	Ccp110	centriolar coiled coil protein 110	-0.12094	-0.120963	4.53328	0.672723	0.952889	-0.100129	-0.100149	4.53328	0.734421	0.967564	-0.0208103	-0.0208145	4.53328	0.947231	1	0.415127	0.4152	4.53328	0.0354442	0.309321	0.219474	0.219516	4.53328	0.370442	0.960901	0.459902	0.460004	4.53328	0.0171272	0.344665	0.314998	0.315051	4.53328	0.143689	0.516025	0.0985349	0.0985527	4.53328	0.740342	1	0.216463	0.216498	4.53328	0.380089	0.956105	0.7749	0.775055
101612	Grwd1	glutamate-rich WD repeat containing 1	0.514448	0.514502	5.53722	0.0010227	0.0129607	0.503064	0.503117	5.53722	0.00140289	0.0145472	0.011384	0.011385	5.53722	0.985558	1	-0.177271	-0.177287	5.53722	0.577784	1	0.0682184	0.0682241	5.53722	0.900479	1	-0.271737	-0.271767	5.53722	0.222656	0.954022	0.325794	0.32583	5.53722	0.0944013	0.410099	0.582667	0.582726	5.53722	0.000141147	0.00350853	-0.256873	-0.256896	5.53722	0.270657	0.868941	0.0540568	0.0540622
101694	Mir9-3hg	Mir9-3 host gene	0.291212	0.291217	8.10791	0.134798	0.422445	0.126907	0.126909	8.10791	0.901967	1	0.164305	0.164308	8.10791	0.783858	1	-0.417105	-0.417113	8.10791	0.00191072	0.0541809	-0.255484	-0.255488	8.10791	0.287916	0.886576	-0.367516	-0.367521	8.10791	0.0129042	0.305125	-0.290199	-0.290204	8.10791	0.138298	0.504823	0.0357283	0.0357289	8.10791	0.992329	1	-0.325927	-0.325933	8.10791	0.0521745	0.428451	-0.657714	-0.657725
101700	Trim68	tripartite motif-containing 68	-1.06676	-1.06745	2.83166	0.000367073	0.00569729	-0.824545	-0.825036	2.83166	0.00389386	0.0314551	-0.242212	-0.242418	2.83166	0.38847	1	0.0439503	0.0439842	2.83166	0.875418	1	0.244381	0.244594	2.83166	0.383212	0.9702	-0.0661491	-0.0661774	2.83166	0.81017	1	-0.780595	-0.781052	2.83166	0.00583787	0.0609932	-0.822375	-0.82286	2.83166	0.00388608	0.0454649	0.0417809	0.041808	2.83166	0.88134	1	-0.846744	-0.847229
101706	Numa1	nuclear mitotic apparatus protein 1	-0.563403	-0.563432	6.41566	0.000119563	0.00224925	-0.482602	-0.482626	6.41566	0.00145998	0.0149548	-0.0808012	-0.0808061	6.41566	0.89694	1	0.0615969	0.0616005	6.41566	0.929666	1	0.342852	0.342871	6.41566	0.0601623	0.467636	0.0669164	0.0669193	6.41566	0.923868	1	-0.421005	-0.421025	6.41566	0.00863114	0.0820483	-0.220551	-0.220561	6.41566	0.420193	0.823912	-0.200454	-0.200464	6.41566	0.506425	1	-0.354088	-0.354106
101786	A730082K24Rik	RIKEN cDNA A730082K24 gene	-0.886038	-0.89284	-1.01494	0.376356	0.74474	-3.52365	-3.61014	-1.01494	0.00518435	0.039457	2.63761	2.7173	-1.01494	0.0294826	0.639959	3.44809	3.53415	-1.01494	0.00610246	0.111126	-0.734362	-0.744224	-1.01494	0.475121	1	2.21304	2.24177	-1.01494	0.0431814	0.523407	-0.0755603	-0.0759962	-1.01494	0.938165	1	-1.6204	-1.63706	-1.01494	0.12105	0.441965	1.54484	1.56107	-1.01494	0.139312	0.671524	2.13748	2.16578
101835	AW146154	expressed sequence AW146154	-0.855173	-0.855549	3.21566	0.0150215	0.0982086	-0.975462	-0.97591	3.21566	0.00629888	0.0455167	0.120289	0.120361	3.21566	0.72402	1	-0.227924	-0.228082	3.21566	0.505774	0.983066	-0.284322	-0.284502	3.21566	0.40563	0.982859	-0.155298	-0.155346	3.21566	0.637271	1	-1.20339	-1.20399	3.21566	0.00104387	0.0168932	-1.13949	-1.14005	3.21566	0.00174059	0.0252333	-0.0638911	-0.0639414	3.21566	0.8514	1	-1.35868	-1.35934
101861	Ints4	integrator complex subunit 4	-0.470294	-0.470324	6.09672	0.00246603	0.0251135	-0.469206	-0.469236	6.09672	0.00254287	0.0228195	-0.00108777	-0.00108787	6.09672	0.998834	1	0.146168	0.146179	6.09672	0.713184	1	0.269567	0.269586	6.09672	0.228131	0.815345	-0.0081913	-0.00819177	6.09672	0.991642	1	-0.323038	-0.323057	6.09672	0.0925418	0.405287	-0.200726	-0.200738	6.09672	0.500203	0.884064	-0.122311	-0.122319	6.09672	0.791297	1	-0.331229	-0.331249
101883	Igflr1	IGF-like family receptor 1	-0.900215	-0.900934	2.31053	0.00613368	0.050692	-0.699305	-0.699824	2.31053	0.0281408	0.135195	-0.20091	-0.20111	2.31053	0.521163	1	-0.774353	-0.775315	2.31053	0.0193371	0.224763	0.283649	0.283925	2.31053	0.364774	0.955875	0.596943	0.59737	2.31053	0.0574516	0.59863	-1.47366	-1.47514	2.31053	4.53666e-05	0.00137525	-0.616566	-0.617009	2.31053	0.0500691	0.262266	-0.857092	-0.85813	2.31053	0.0101769	0.172565	-0.876714	-0.87777
101985	Usb1	U6 snRNA biogenesis 1	0.261026	0.26105	5.6827	0.256919	0.607552	0.507159	0.507203	5.6827	0.000913065	0.0104114	-0.246133	-0.246153	5.6827	0.310849	1	-0.261897	-0.261918	5.6827	0.253943	0.772509	0.0436883	0.043692	5.6827	0.948107	1	-0.217854	-0.217875	5.6827	0.423551	1	0.245262	0.245286	5.6827	0.314027	0.761274	0.304714	0.304743	5.6827	0.131276	0.463613	-0.0594519	-0.059457	5.6827	0.92499	1	0.0274081	0.0274105
102058	Exoc8	exocyst complex component 8	0.234816	0.234849	5.09319	0.328336	0.695019	0.230945	0.230978	5.09319	0.339444	0.666651	0.00387096	0.00387142	5.09319	0.99068	1	0.280101	0.280134	5.09319	0.211523	0.717653	0.297286	0.297321	5.09319	0.174628	0.737614	-0.00449504	-0.00449545	5.09319	0.989179	1	0.511045	0.511112	5.09319	0.00559687	0.059114	0.532101	0.532171	5.09319	0.00367471	0.0436454	-0.0210562	-0.0210585	5.09319	0.949964	1	0.50655	0.506617
102075	Plekhg4	pleckstrin homology domain containing, family G (with RhoGef domain) member 4	1.67047	1.74288	-1.0263	0.162772	0.469859	3.85623	3.9535	-1.0263	0.00305185	0.0259999	-2.18576	-2.21062	-1.0263	0.0520518	0.774541	-0.444463	-0.446958	-1.0263	0.660257	1	0.749502	0.762475	-1.0263	0.487639	1	-2.73697	-2.82611	-1.0263	0.0252758	0.413047	3.41177	3.50654	-1.0263	0.00708097	0.0703694	2.41998	2.50535	-1.0263	0.0452528	0.245551	0.991794	1.00119	-1.0263	0.342173	0.929524	0.674798	0.680433
102115	Dohh	deoxyhypusine hydroxylase/monooxygenase	0.600541	0.600583	6.1723	3.42799e-05	0.000813422	0.733941	0.73399	6.1723	5.22675e-07	2.06708e-05	-0.1334	-0.133407	6.1723	0.771996	1	-0.328354	-0.328373	6.1723	0.0801165	0.467947	0.025028	0.0250293	6.1723	0.976409	1	-0.425478	-0.42551	6.1723	0.00748762	0.241221	0.405587	0.405617	6.1723	0.0129543	0.109018	0.625569	0.625613	6.1723	1.51664e-05	0.000591339	-0.219982	-0.219995	6.1723	0.423306	0.987541	-0.0198911	-0.0198924
102162	Taf5l	TATA-box binding protein associated factor 5 like	0.519089	0.519125	6.0265	0.0012844	0.0153707	0.504565	0.5046	6.0265	0.00187914	0.0182434	0.0145243	0.0145251	6.0265	0.978421	1	-0.419141	-0.419169	6.0265	0.0155757	0.199087	-0.178027	-0.178038	6.0265	0.559373	1	-0.298016	-0.298038	6.0265	0.155242	0.856553	0.0854237	0.0854306	6.0265	0.847171	1	0.341062	0.341087	6.0265	0.0763411	0.340961	-0.255638	-0.255656	6.0265	0.273686	0.869995	-0.212592	-0.212608
102193	Zdhhc7	zinc finger, DHHC domain containing 7	0.431258	0.431293	5.9012	0.0101497	0.0739117	0.55382	0.553862	5.9012	0.00037923	0.00520876	-0.122562	-0.12257	5.9012	0.76335	1	-0.314338	-0.31436	5.9012	0.117002	0.556085	0.0332715	0.0332737	5.9012	0.954091	1	-0.220889	-0.220908	5.9012	0.40107	1	0.239482	0.239502	5.9012	0.331007	0.779199	0.464529	0.464566	5.9012	0.00434873	0.0491239	-0.225048	-0.225064	5.9012	0.385237	0.960486	0.0185928	0.0185942
102209	Snapc2	small nuclear RNA activating complex, polypeptide 2	0.445108	0.445127	6.75591	0.00172726	0.019055	0.492383	0.492404	6.75591	0.000310563	0.00443245	-0.0472752	-0.0472769	6.75591	0.974366	1	-0.307561	-0.307573	6.75591	0.104651	0.527557	-0.0590335	-0.0590357	6.75591	0.964891	1	-0.220274	-0.220285	6.75591	0.452883	1	0.184822	0.184831	6.75591	0.629988	0.985874	0.386074	0.386091	6.75591	0.0123983	0.103797	-0.201252	-0.20126	6.75591	0.54986	1	-0.0354522	-0.0354537
102216272	Ak6	adenylate kinase 6	0.61145	0.611532	5.33991	0.000301881	0.00485294	0.874624	0.874732	5.33991	5.60113e-07	2.19717e-05	-0.263173	-0.263199	5.33991	0.250523	1	-0.0623612	-0.062367	5.33991	0.871658	1	0.117557	0.117569	5.33991	0.725616	1	-0.39067	-0.390727	5.33991	0.0388876	0.502034	0.812262	0.812365	5.33991	2.2723e-06	0.000108772	0.729007	0.729101	5.33991	1.66208e-05	0.000637757	0.0832556	0.0832636	5.33991	0.821178	1	0.421592	0.421638
102294	Cyp4v3	cytochrome P450, family 4, subfamily v, polypeptide 3	-0.175081	-0.175117	4.29947	0.481318	0.83218	-0.743324	-0.743512	4.29947	0.00107775	0.0118602	0.568243	0.568395	4.29947	0.0123767	0.447645	0.0822537	0.0822797	4.29947	0.747112	1	0.0319261	0.0319332	4.29947	0.901225	1	-0.211169	-0.211208	4.29947	0.389014	1	-0.661071	-0.661232	4.29947	0.00330673	0.0401973	-0.143155	-0.143184	4.29947	0.568927	0.927902	-0.517915	-0.518049	4.29947	0.0225342	0.275024	-0.87224	-0.87244
102502	Pls1	plastin 1 (I-isoform)	0.160537	0.160553	5.32534	0.535657	0.871832	-0.283405	-0.283438	5.32534	0.212421	0.513564	0.443942	0.443991	5.32534	0.0292692	0.637209	-0.15007	-0.15009	5.32534	0.564544	1	-0.303158	-0.30319	5.32534	0.174253	0.737291	-0.265745	-0.265771	5.32534	0.249812	0.980738	-0.433475	-0.433528	5.32534	0.0338912	0.213492	-0.142621	-0.142637	5.32534	0.589174	0.938166	-0.290854	-0.290891	5.32534	0.197864	0.777112	-0.699219	-0.699299
102545	Cmtm7	CKLF-like MARVEL transmembrane domain containing 7	1.27264	1.27336	3.24793	5.17762e-06	0.000174747	0.97799	0.978591	3.24793	0.000198198	0.00309858	0.294655	0.29477	3.24793	0.241234	1	-0.309615	-0.309764	3.24793	0.219248	0.728154	-0.158133	-0.158192	3.24793	0.537326	1	-0.819175	-0.819703	3.24793	0.00129067	0.0885118	0.668374	0.668827	3.24793	0.00761907	0.0743416	1.11451	1.11517	3.24793	3.65493e-05	0.00118795	-0.446138	-0.446342	3.24793	0.0717296	0.496597	-0.1508	-0.150876
102595	Plekho2	pleckstrin homology domain containing, family O member 2	0.127494	0.127517	4.55677	0.671782	0.952184	0.0419703	0.041978	4.55677	0.903355	1	0.0855236	0.0855385	4.55677	0.791854	1	-0.470937	-0.471037	4.55677	0.0112351	0.162267	-0.344035	-0.344101	4.55677	0.093544	0.567871	-0.235972	-0.236012	4.55677	0.327171	1	-0.428967	-0.429059	4.55677	0.023993	0.167388	-0.216541	-0.216584	4.55677	0.385582	0.794123	-0.212425	-0.212475	4.55677	0.396778	0.968743	-0.664938	-0.665071
102614	Rpp25	ribonuclease P/MRP 25 subunit	0.230423	0.230523	3.03313	0.361451	0.729351	-0.182894	-0.182985	3.03313	0.473137	0.792665	0.413317	0.413507	3.03313	0.093744	0.926345	-0.250412	-0.250557	3.03313	0.323397	0.850686	-0.794914	-0.795338	3.03313	0.0014751	0.0462351	0.50575	0.506033	3.03313	0.0392252	0.503357	-0.433305	-0.433542	3.03313	0.0789241	0.369031	-0.564491	-0.564816	3.03313	0.0212794	0.151184	0.131186	0.131274	3.03313	0.611467	1	0.0724451	0.0724916
102626	Mapkapk3	mitogen-activated protein kinase-activated protein kinase 3	-0.125117	-0.125244	2.19839	0.671329	0.952064	-0.506117	-0.50671	2.19839	0.090923	0.298533	0.381	0.381465	2.19839	0.2033	1	0.0560867	0.0561635	2.19839	0.851566	1	0.0509728	0.0510242	2.19839	0.863296	1	-0.777455	-0.778043	2.19839	0.0101814	0.276155	-0.450031	-0.450546	2.19839	0.130945	0.490724	-0.0741444	-0.07422	2.19839	0.801123	1	-0.375886	-0.376326	2.19839	0.207757	0.790909	-1.22749	-1.22859
102631518	Gm38438	predicted gene, 38438	-1.01464	-1.01577	2.14864	0.00345902	0.0327912	-1.20799	-1.20944	2.14864	0.000710332	0.00852561	0.193351	0.19367	2.14864	0.559612	1	0.610863	0.611741	2.14864	0.0697716	0.438089	0.302511	0.302938	2.14864	0.357448	0.951299	-0.451157	-0.451452	2.14864	0.158978	0.861349	-0.597131	-0.597695	2.14864	0.0691334	0.338045	-0.712132	-0.712829	2.14864	0.0324033	0.199062	0.115001	0.115134	2.14864	0.722987	1	-1.04829	-1.04915
102631562	Gm29868	predicted gene, 29868	-2.489	-2.49364	1.39598	5.03028e-05	0.0011156	-2.33511	-2.33916	1.39598	9.9131e-05	0.00176358	-0.15389	-0.154476	1.39598	0.769243	1	0.415556	0.416821	1.39598	0.421225	0.926675	1.24278	1.24604	1.39598	0.0211624	0.258698	1.52365	1.52552	1.39598	0.00435721	0.176228	-1.91955	-1.92234	1.39598	0.000648031	0.0116466	-1.24622	-1.2476	1.39598	0.0161172	0.124926	-0.673337	-0.674744	1.39598	0.185611	0.759369	-0.395909	-0.396822
102631606	Gm29903	predicted gene, 29903	-1.42225	-1.42683	0.436642	0.0424643	0.202121	-2.35887	-2.37017	0.436642	0.00241658	0.0219968	0.936618	0.943333	0.436642	0.192247	1	0.875161	0.881556	0.436642	0.221625	0.732196	0.0925112	0.0929222	0.436642	0.891536	1	0.0764261	0.0765755	0.436642	0.906407	1	-1.48371	-1.48861	0.436642	0.0350055	0.217816	-1.32974	-1.33391	0.436642	0.0550854	0.278463	-0.153968	-0.154699	0.436642	0.8204	1	-1.40728	-1.41203
102631647	Gm16041	predicted gene 16041	-1.6775	-1.68094	0.988893	0.00510905	0.0442274	-1.59245	-1.59561	0.988893	0.00728639	0.0508339	-0.0850468	-0.0853379	0.988893	0.879457	1	0.734172	0.73605	0.988893	0.190561	0.688011	-0.609867	-0.612555	0.988893	0.290524	0.888721	1.34666	1.34907	0.988893	0.0193876	0.367954	-0.858281	-0.859556	0.988893	0.119355	0.465955	-2.28737	-2.2935	0.988893	0.000417624	0.00834343	1.42909	1.43394	0.988893	0.0168009	0.229458	0.488379	0.489517
102631705	Gm29975	predicted gene, 29975	-1.06318	-1.064	2.40458	0.000839545	0.0111053	-1.17752	-1.17847	2.40458	0.000281902	0.00409902	0.114336	0.114466	2.40458	0.702377	1	0.797974	0.798699	2.40458	0.00958811	0.148103	0.0181526	0.0181774	2.40458	0.951379	1	0.940474	0.941167	2.40458	0.00258034	0.131469	-0.379544	-0.37977	2.40458	0.192459	0.599544	-1.04503	-1.04583	2.40458	0.000960571	0.0160419	0.665486	0.666055	2.40458	0.0271053	0.303253	0.560931	0.561397
102631841	Gm26629	predicted gene, 26629	-1.18349	-1.18472	2.16521	0.000666335	0.00921105	-0.312838	-0.313069	2.16521	0.31783	0.643884	-0.870653	-0.871646	2.16521	0.00972189	0.388454	-0.563256	-0.563828	2.16521	0.0799522	0.467791	0.463108	0.46371	2.16521	0.152602	0.698268	0.67659	0.677165	2.16521	0.0360869	0.484491	-0.876094	-0.876898	2.16521	0.00826497	0.0794809	-0.720384	-0.721006	2.16521	0.0266155	0.175372	-0.15571	-0.155892	2.16521	0.623101	1	-0.199504	-0.199733
102631909	Gm30124	predicted gene, 30124	-1.48717	-1.49138	1.31434	0.0201755	0.120984	-1.27527	-1.27861	1.31434	0.042081	0.177687	-0.211902	-0.21277	1.31434	0.734177	1	2.35162	2.35619	1.31434	0.000643407	0.0253936	1.41575	1.41985	1.31434	0.0266584	0.293258	1.34221	1.34573	1.31434	0.0323414	0.460893	1.07635	1.07758	1.31434	0.0699355	0.340504	-0.0714219	-0.0715314	1.31434	0.901821	1	1.14777	1.14911	1.31434	0.0554082	0.44167	2.41855	2.42331
102631979	LOC102631979	uncharacterized LOC102631979	-2.41797	-2.42444	1.10621	9.67315e-06	0.000291839	-1.15576	-1.15759	1.10621	0.0103855	0.0660678	-1.26221	-1.26685	1.10621	0.0079615	0.340801	-0.000293076	-0.000295482	1.10621	0.999466	1	1.18877	1.19324	1.10621	0.0117517	0.184467	1.31813	1.32035	1.10621	0.00410717	0.170814	-1.15606	-1.15789	1.10621	0.0101735	0.0921157	-1.2292	-1.2312	1.10621	0.00679873	0.0676689	0.0731415	0.0733124	1.10621	0.865398	1	0.162071	0.162464
102631993	LOC102631993	uncharacterized LOC102631993	-1.68051	-1.68482	1.07584	0.00145959	0.0168374	-0.755412	-0.756749	1.07584	0.112036	0.342615	-0.925102	-0.92807	1.07584	0.0624822	0.807177	-0.570297	-0.57188	1.07584	0.236657	0.751028	0.999289	1.00241	1.07584	0.0448725	0.397158	0.351058	0.351594	1.07584	0.449426	1	-1.32571	-1.32863	1.07584	0.00843302	0.080616	-0.681225	-0.682405	1.07584	0.149151	0.499192	-0.644484	-0.646224	1.07584	0.181593	0.753474	-0.974651	-0.977035
102632019	Gm26777	predicted gene, 26777	-1.33981	-1.3413	1.7373	0.00168462	0.0186699	-1.38253	-1.38408	1.7373	0.00125769	0.0134008	0.0427171	0.0427843	1.7373	0.915034	1	-0.140365	-0.140639	1.7373	0.725575	1	0.359938	0.360469	1.7373	0.367763	0.958765	1.41133	1.41293	1.7373	0.00105685	0.0768406	-1.5229	-1.52472	1.7373	0.000489002	0.00937174	-0.979877	-0.980828	1.7373	0.016041	0.124537	-0.543021	-0.543892	1.7373	0.176242	0.743533	-0.111572	-0.11179
102632045	Gm30220	predicted gene, 30220	-1.86949	-1.89638	-1.39564	0.0853357	0.315728	-3.51849	-3.62714	-1.39564	0.00584551	0.0429968	1.64899	1.73077	-1.39564	0.171302	1	2.28664	2.3817	-1.39564	0.0593949	0.403844	0.313348	0.320785	-1.39564	0.767738	1	0.362553	0.365437	-1.39564	0.715645	1	-1.23185	-1.24544	-1.39564	0.233574	0.662923	-1.55614	-1.57559	-1.39564	0.139935	0.481958	0.324299	0.330149	-1.39564	0.754976	1	-0.869293	-0.880004
102632096	Gm38442	predicted gene, 38442	-4.67229	-5.07391	-1.81979	0.0026624	0.0266916	-6.65482	-12.3488	-1.81979	0.000534667	0.00687038	1.98254	7.27488	-1.81979	0.260307	1	5.18918	10.858	-1.81979	0.00525814	0.102044	3.93112	4.32307	-1.81979	0.00949433	0.160359	0.338834	0.342582	-1.81979	0.749988	1	-1.46564	-1.49078	-1.81979	0.192664	0.599795	-0.741169	-0.750848	-1.81979	0.4924	0.877974	-0.724475	-0.739937	-1.81979	0.51631	1	-1.12681	-1.1482
102632130	Gm30284	predicted gene, 30284	-3.35455	-3.41688	-0.411878	0.00290215	0.0286337	0.236491	0.237486	-0.411878	0.784786	0.985986	-3.59104	-3.65437	-0.411878	0.00173474	0.135695	-1.09875	-1.10513	-0.411878	0.222531	0.733064	3.17	3.23139	-0.411878	0.00453232	0.0999436	0.860148	0.865583	-0.411878	0.334725	1	-0.862256	-0.867649	-0.411878	0.33316	0.78163	-0.184551	-0.185493	-0.411878	0.831886	1	-0.677705	-0.682155	-0.411878	0.447295	0.999436	-0.00210859	-0.0020658
102632136	Gm20482	predicted gene 20482	-0.654937	-0.655561	2.00094	0.0518498	0.229299	-0.945129	-0.946134	2.00094	0.00678101	0.0483013	0.290192	0.290573	2.00094	0.384616	1	-0.321863	-0.322386	2.00094	0.339993	0.866827	-0.419275	-0.419844	2.00094	0.21213	0.792577	0.0344006	0.0344263	2.00094	0.915239	1	-1.26699	-1.26852	2.00094	0.00051808	0.00981308	-1.07421	-1.07541	2.00094	0.00243919	0.032577	-0.19278	-0.193115	2.00094	0.565955	1	-1.23259	-1.23409
102632284	Gm30400	predicted gene, 30400	-1.2174	-1.21795	3.13708	0.000293328	0.00475896	-1.05285	-1.05329	3.13708	0.00129964	0.0137493	-0.164551	-0.164655	3.13708	0.593253	1	0.37892	0.379119	3.13708	0.215917	0.723285	-0.284072	-0.284277	3.13708	0.359976	0.952988	0.924918	0.925289	3.13708	0.00393994	0.166728	-0.673928	-0.674175	3.13708	0.0287427	0.190884	-1.50147	-1.50223	3.13708	2.25148e-05	0.000808735	0.827544	0.828051	3.13708	0.0101568	0.172565	0.25099	0.251114
102632394	Gm26910	predicted gene, 26910	-1.26689	-1.26826	2.06132	0.00101073	0.0128596	-1.28979	-1.2912	2.06132	0.000858914	0.00994643	0.0228978	0.0229387	2.06132	0.949275	1	0.619044	0.619879	2.06132	0.089994	0.490189	0.579164	0.579937	2.06132	0.111798	0.611509	0.509817	0.510232	2.06132	0.147904	0.841266	-0.670743	-0.671321	2.06132	0.0610263	0.312118	-0.687726	-0.688324	2.06132	0.0553381	0.278983	0.0169826	0.0170029	2.06132	0.961233	1	-0.160926	-0.161089
102632417	Gm30493	predicted gene, 30493	-1.55235	-1.55637	0.462432	0.0222599	0.129742	-1.68523	-1.68982	0.462432	0.0143924	0.083609	0.132879	0.13345	0.462432	0.838588	1	0.0656195	0.0659027	0.462432	0.919569	1	-0.659064	-0.662636	0.462432	0.322575	0.918881	1.56512	1.5692	0.462432	0.0211001	0.379586	-1.61961	-1.62391	0.462432	0.0173906	0.133938	-2.21141	-2.219	0.462432	0.002408	0.0322719	0.591804	0.595089	0.462432	0.371785	0.951892	-0.0544821	-0.0547175
102632465	Gm13391	predicted gene 13391	-1.7149	-1.72537	-0.990341	0.143977	0.439383	-3.85588	-3.9066	-0.990341	0.00366867	0.0300843	2.14098	2.18123	-0.990341	0.0819383	0.887394	2.375	2.41898	-0.990341	0.0513887	0.373611	0.742374	0.749092	-0.990341	0.517199	1	0.0623735	0.0625689	-0.990341	0.95427	1	-1.48089	-1.48762	-0.990341	0.19315	0.600475	-0.972523	-0.976281	-0.990341	0.380393	0.78967	-0.508363	-0.511344	-0.990341	0.648987	1	-1.41851	-1.42506
102632483	Gm17330	predicted gene, 17330	1.34085	1.34211	2.23941	0.00744018	0.0588258	-0.282844	-0.283294	2.23941	0.557908	0.860845	1.62369	1.6254	2.23941	0.00195132	0.145701	1.62138	1.6231	2.23941	0.00193779	0.0548682	-1.01879	-1.01964	2.23941	0.0362513	0.35141	0.268379	0.268842	2.23941	0.577562	1	1.33854	1.3398	2.23941	0.00740967	0.0727758	0.322056	0.322466	2.23941	0.498293	0.881978	1.01648	1.01734	2.23941	0.036244	0.355438	1.60692	1.60864
102632484	Gm26691	predicted gene, 26691	-2.98435	-3.02287	-0.581071	0.00103176	0.0130328	-1.85697	-1.87141	-0.581071	0.0191044	0.10223	-1.12738	-1.15146	-0.581071	0.171088	1	0.764559	0.772742	-0.581071	0.309752	0.838388	2.13704	2.17115	-0.581071	0.0124422	0.190419	0.769421	0.773306	-0.581071	0.290078	1	-1.09241	-1.09867	-0.581071	0.139968	0.507375	-0.847312	-0.851713	-0.581071	0.244785	0.647316	-0.245099	-0.246953	-0.581071	0.735549	1	-0.32299	-0.325361
102632686	Gm16351	predicted gene 16351	-1.20396	-1.21006	0.30373	0.0471147	0.216015	-0.756023	-0.759106	0.30373	0.202068	0.49847	-0.447934	-0.450955	0.30373	0.454776	1	1.39724	1.40201	0.30373	0.023411	0.250412	1.55627	1.5634	0.30373	0.0126527	0.191914	1.54326	1.55255	0.30373	0.0163879	0.337514	0.641218	0.642906	0.30373	0.262577	0.701983	0.352318	0.353339	0.30373	0.535394	0.907129	0.288899	0.289566	0.30373	0.609897	1	2.18448	2.19545
102632688	Gm30694	predicted gene, 30694	-0.43491	-0.439081	-0.645811	0.649575	0.941312	0.486828	0.490157	-0.645811	0.605488	0.89456	-0.921738	-0.929238	-0.645811	0.341174	1	0.425239	0.427354	-0.645811	0.649638	1	0.716333	0.72255	-0.645811	0.457356	1	3.11002	3.20245	-0.645811	0.00929081	0.264124	0.912067	0.917511	-0.645811	0.335904	0.784933	0.281423	0.283469	-0.645811	0.764867	1	0.630643	0.634042	-0.645811	0.502795	1	4.02209	4.11996
102632743	Gm30735	predicted gene, 30735	-2.12707	-2.14254	0.0825745	0.00556866	0.0472749	-0.778191	-0.781466	0.0825745	0.249972	0.564743	-1.34888	-1.36108	0.0825745	0.0662854	0.820689	0.704887	0.707921	0.0825745	0.297814	0.824638	1.33179	1.34393	0.0825745	0.0687078	0.49506	0.171036	0.171618	0.0825745	0.794849	1	-0.073304	-0.0735447	0.0825745	0.911104	1	-0.795279	-0.798618	0.0825745	0.238581	0.641316	0.721975	0.725074	0.0825745	0.285049	0.880896	0.0977321	0.0980734
102632851	Gm30816	predicted gene, 30816	-1.35099	-1.35449	0.818167	0.0316437	0.16549	-1.81639	-1.82207	0.818167	0.00606814	0.0441522	0.465394	0.467582	0.818167	0.454403	1	1.5091	1.51424	0.818167	0.019612	0.226705	0.480742	0.482367	0.818167	0.428677	0.996177	0.926755	0.928783	0.818167	0.125319	0.794606	-0.307288	-0.307823	0.818167	0.599135	0.97114	-0.870253	-0.87212	0.818167	0.148623	0.498407	0.562964	0.564296	0.818167	0.345571	0.932208	0.619466	0.62096
102633083	Gm30996	predicted gene, 30996	-1.46933	-1.47376	0.37239	0.0631577	0.259973	-2.71777	-2.73163	0.37239	0.0024923	0.0224598	1.24844	1.25787	0.37239	0.131966	0.999493	2.37334	2.38652	0.37239	0.00671564	0.118067	-1.40341	-1.41467	0.37239	0.0915367	0.562647	1.4163	1.42044	0.37239	0.0711715	0.656673	-0.344437	-0.345111	0.37239	0.641039	0.99002	-2.87274	-2.88842	0.37239	0.00156216	0.0232928	2.5283	2.54331	0.37239	0.00422907	0.102876	1.07186	1.07533
102633149	LOC102633149	uncharacterized LOC102633149	-0.609477	-0.609678	3.63218	0.00803615	0.0623592	-0.674933	-0.675161	3.63218	0.00348302	0.0289339	0.0654565	0.0654831	3.63218	0.798097	1	0.462796	0.462962	3.63218	0.0475041	0.35858	-0.100007	-0.100046	3.63218	0.694446	1	0.552908	0.553087	3.63218	0.0161829	0.336318	-0.212138	-0.212198	3.63218	0.389842	0.831678	-0.709484	-0.709724	3.63218	0.00213999	0.0295188	0.497346	0.497526	3.63218	0.0321164	0.333745	0.34077	0.340888
102633226	Gm31107	predicted gene, 31107	-4.34162	-4.54119	-1.05606	0.00187786	0.0203337	-0.732159	-0.738505	-1.05606	0.4624	0.784106	-3.60946	-3.80268	-1.05606	0.00776501	0.334449	0.834072	0.841076	-1.05606	0.404326	0.913759	3.45927	3.65073	-1.05606	0.0101905	0.167866	1.31124	1.32563	-1.05606	0.201325	0.923925	0.101914	0.102571	-1.05606	0.916474	1	-0.882342	-0.890459	-1.05606	0.377818	0.787183	0.984256	0.99303	-1.05606	0.327352	0.915009	1.41316	1.4282
102633235	Gm31113	predicted gene, 31113	-3.08336	-3.10084	0.0982801	0.000444362	0.00663079	-1.73301	-1.73844	0.0982801	0.0217637	0.112537	-1.35034	-1.3624	0.0982801	0.0831538	0.892109	-0.768639	-0.774073	0.0982801	0.296876	0.823006	0.91284	0.92214	0.0982801	0.233478	0.820584	1.47006	1.4742	0.0982801	0.0457677	0.537804	-2.50165	-2.51251	0.0982801	0.00211871	0.028454	-2.17052	-2.1787	0.0982801	0.00575775	0.0601562	-0.331135	-0.333812	0.0982801	0.650633	1	-1.03159	-1.03831
102633240	Gm31115	predicted gene, 31115	-1.06633	-1.0672	2.49644	0.00565769	0.04782	-1.38776	-1.38905	2.49644	0.000613816	0.00763873	0.321432	0.321842	2.49644	0.393145	1	0.697791	0.698586	2.49644	0.0661754	0.427619	-0.119094	-0.11924	2.49644	0.748561	1	-0.362866	-0.363041	2.49644	0.310195	1	-0.689973	-0.690461	2.49644	0.0616961	0.314049	-1.18543	-1.18644	2.49644	0.00252091	0.0333233	0.495454	0.495983	2.49644	0.185307	0.758921	-1.05284	-1.0535
102633245	Gm15723	predicted gene 15723	-0.939671	-0.940683	1.76758	0.0160987	0.10333	-1.33521	-1.33689	1.76758	0.00118056	0.0127231	0.395542	0.396203	1.76758	0.306064	1	0.8599	0.861143	1.76758	0.0283765	0.277719	-0.312044	-0.312543	1.76758	0.415287	0.990579	1.38792	1.38969	1.76758	0.000798478	0.0643407	-0.475313	-0.475743	1.76758	0.205232	0.62025	-1.25172	-1.25323	1.76758	0.00200794	0.0283029	0.776403	0.777483	1.76758	0.0452286	0.397246	0.912603	0.913948
102633300	Gm31159	predicted gene, 31159	-1.35594	-1.36032	0.3925	0.0215542	0.126891	-1.77325	-1.78004	0.3925	0.00415422	0.0330204	0.417311	0.419719	0.3925	0.469982	1	0.968527	0.97322	0.3925	0.0974119	0.509077	0.866629	0.869882	0.3925	0.130574	0.655925	1.78085	1.78768	0.3925	0.00391224	0.166575	-0.804724	-0.806818	0.3925	0.15119	0.529111	-0.48931	-0.490436	0.3925	0.374221	0.783995	-0.315413	-0.316382	0.3925	0.569055	1	0.976129	0.980865
102633347	Gm26708	predicted gene, 26708	-1.82638	-1.83951	-0.206663	0.0176875	0.110663	-1.28302	-1.29041	-0.206663	0.0788521	0.271387	-0.543367	-0.549108	-0.206663	0.457683	1	2.21801	2.22787	-0.206663	0.00465512	0.0947635	0.924116	0.932964	-0.206663	0.206661	0.784612	1.26146	1.26859	-0.206663	0.0851085	0.695267	0.934992	0.937463	-0.206663	0.183164	0.585198	-0.902268	-0.90655	-0.206663	0.201529	0.588856	1.83726	1.84401	-0.206663	0.0143578	0.209934	2.19646	2.20605
102633431	Gm31261	predicted gene, 31261	-2.69822	-2.7497	-1.12292	0.0276717	0.150858	-4.5384	-4.75858	-1.12292	0.00237494	0.0217056	1.84018	2.00888	-1.12292	0.197335	1	3.48036	3.69061	-1.12292	0.0152818	0.196892	2.1559	2.2033	-1.12292	0.0716702	0.504302	0.0948955	0.0955451	-1.12292	0.927164	1	-1.05804	-1.06798	-1.12292	0.324431	0.772397	-0.542318	-0.546397	-1.12292	0.604214	0.946989	-0.515726	-0.521579	-1.12292	0.628755	1	-0.963148	-0.972431
102633432	Gm31262	predicted gene, 31262	-1.82059	-1.8285	0.167406	0.00333315	0.0319108	-2.50934	-2.52411	0.167406	0.000227247	0.00343607	0.688748	0.695611	0.167406	0.251141	1	1.99569	2.00913	0.167406	0.00202756	0.0567453	0.0183429	0.0184643	0.167406	0.974604	1	0.70526	0.707238	0.167406	0.204664	0.928995	-0.513646	-0.514986	0.167406	0.350379	0.799809	-1.80224	-1.81004	0.167406	0.00351271	0.0422566	1.2886	1.29505	0.167406	0.029526	0.317667	0.191614	0.192252
102633497	A730080H06Rik	RIKEN cDNA A730080H06 gene	-0.388283	-0.38849	2.81224	0.183003	0.503786	-0.426479	-0.42671	2.81224	0.143819	0.403697	0.0381967	0.0382202	2.81224	0.896633	1	0.0306931	0.0307127	2.81224	0.916373	1	-0.0142187	-0.0142276	2.81224	0.961396	1	1.34369	1.34472	2.81224	5.47281e-05	0.0108676	-0.395786	-0.395998	2.81224	0.172183	0.566493	-0.402502	-0.402718	2.81224	0.166846	0.532098	0.00671517	0.00672017	2.81224	0.981634	1	0.9479	0.948719
102633518	Gm31326	predicted gene, 31326	-2.88771	-2.91273	-0.401593	0.00134851	0.0159271	-1.68087	-1.68945	-0.401593	0.033966	0.154568	-1.20684	-1.22328	-0.401593	0.138074	1	0.724125	0.729058	-0.401593	0.340097	0.866827	1.35836	1.37608	-0.401593	0.0960156	0.573085	2.51264	2.53112	-0.401593	0.0035578	0.160421	-0.956744	-0.960391	-0.401593	0.201255	0.613213	-1.52935	-1.53665	-0.401593	0.0501533	0.262565	0.572609	0.576259	-0.401593	0.446204	0.999436	1.5559	1.57073
102633560	Gm31356	predicted gene, 31356	-1.51686	-1.52058	1.01668	0.00131744	0.0156075	-0.76985	-0.771255	1.01668	0.0750753	0.262451	-0.747008	-0.749327	1.01668	0.0926257	0.921919	0.00264535	0.00263364	1.01668	0.995088	1	0.446856	0.448387	1.01668	0.308004	0.90705	0.621727	0.62281	1.01668	0.145176	0.836706	-0.767205	-0.768621	1.01668	0.0753188	0.3576	-1.07	-1.0722	1.01668	0.01588	0.123764	0.302797	0.303574	1.01668	0.480585	1	-0.145478	-0.145811
102633596	LOC102633596	dnaJ homolog subfamily B member 6 pseudogene	0.2078	0.20798	2.27352	0.573668	0.898388	0.138854	0.138978	2.27352	0.706978	0.95377	0.0689456	0.0690012	2.27352	0.852022	1	0.303781	0.304009	2.27352	0.41184	0.918193	-0.548469	-0.549003	2.27352	0.148272	0.690616	0.837397	0.838447	2.27352	0.0313977	0.454491	0.442635	0.442988	2.27352	0.233929	0.66353	-0.34067	-0.341023	2.27352	0.363208	0.771397	0.783305	0.784011	2.27352	0.040772	0.3789	1.28003	1.28144
102633673	Etaa1os	Ewing tumor-associated antigen 1, opposite strand	-0.372676	-0.373434	0.95296	0.386323	0.754885	-0.7337	-0.735415	0.95296	0.0953369	0.308727	0.361024	0.361981	0.95296	0.408507	1	-0.697559	-0.700279	0.95296	0.121284	0.566981	-0.446771	-0.448007	0.95296	0.306001	0.904855	-0.44445	-0.445143	0.95296	0.297087	1	-1.43126	-1.43569	0.95296	0.00251539	0.0326696	-0.819447	-0.821441	0.95296	0.0630854	0.303787	-0.611813	-0.614253	0.95296	0.170778	0.73499	-1.87571	-1.88084
102633686	Gm31450	predicted gene, 31450	2.87386	2.88717	1.09555	0.000183463	0.00322127	2.61572	2.62862	1.09555	0.000485408	0.00639462	0.258144	0.258549	1.09555	0.666657	1	-0.0348116	-0.0348759	1.09555	0.953664	1	-0.8635	-0.865223	1.09555	0.161962	0.710833	-2.46641	-2.47902	1.09555	0.000854111	0.0664203	2.5809	2.59374	1.09555	0.000542937	0.010194	2.01036	2.02195	1.09555	0.0047821	0.0525461	0.570545	0.571798	1.09555	0.350145	0.934957	0.114498	0.114721
102633715	Gm31474	predicted gene, 31474	-1.96575	-1.97495	-0.0110718	0.0164053	0.104776	-1.16283	-1.16673	-0.0110718	0.128015	0.372957	-0.802916	-0.808214	-0.0110718	0.301466	1	0.067899	0.0682171	-0.0110718	0.927762	1	0.768194	0.773312	-0.0110718	0.321592	0.918514	3.2976	3.3254	-0.0110718	0.000497799	0.0486209	-1.09493	-1.09852	-0.0110718	0.148712	0.525479	-1.19755	-1.20164	-0.0110718	0.117225	0.434292	0.102621	0.103119	-0.0110718	0.890862	1	2.20267	2.22688
102633829	Gm31560	predicted gene, 31560	-0.601605	-0.60341	0.544226	0.387667	0.755984	-2.57217	-2.58951	0.544226	0.00225493	0.020839	1.97056	1.9861	0.544226	0.0151344	0.483247	2.54289	2.56016	0.544226	0.00251338	0.0645501	-0.471465	-0.473435	0.544226	0.505257	1	-0.281752	-0.282375	0.544226	0.679456	1	-0.0292751	-0.0293468	0.544226	0.965768	1	-1.07307	-1.07684	0.544226	0.133306	0.467878	1.04379	1.0475	0.544226	0.14464	0.680362	-0.311027	-0.311722
102633888	Gm31606	predicted gene, 31606	-2.46859	-2.47556	0.631151	0.000966069	0.0124303	-1.64307	-1.64634	0.631151	0.0159478	0.0902059	-0.825527	-0.82922	0.631151	0.21819	1	-0.680808	-0.683707	0.631151	0.301503	0.827845	-0.758859	-0.764669	0.631151	0.273803	0.872335	1.39794	1.40045	0.631151	0.0352762	0.480194	-2.32387	-2.33005	0.631151	0.00147788	0.022053	-3.22745	-3.24023	0.631151	8.30486e-05	0.00230097	0.903578	0.910181	0.631151	0.190123	0.766958	-0.925938	-0.929601
102633908	Gm31621	predicted gene, 31621	-0.391528	-0.393268	-1.27068	0.720295	0.976084	-3.56991	-3.63351	-1.27068	0.00694445	0.0491037	3.17838	3.24024	-1.27068	0.014577	0.479795	1.70417	1.75194	-1.27068	0.15873	0.636996	-2.26554	-2.296	-1.27068	0.0591244	0.463615	1.86687	1.88275	-1.27068	0.104131	0.754372	-1.86575	-1.88156	-1.27068	0.105092	0.435104	-2.65707	-2.68927	-1.27068	0.0287671	0.183849	0.791323	0.807703	-1.27068	0.485372	1	0.00112912	0.0011901
102633913	Gm31623	predicted gene, 31623	-1.05681	-1.06331	-0.626986	0.229071	0.570287	-4.32173	-4.43987	-0.626986	0.000376203	0.00517454	3.26492	3.37656	-0.626986	0.00433721	0.233337	3.52265	3.63635	-0.626986	0.00237044	0.0627112	0.788474	0.793723	-0.626986	0.367626	0.958765	1.78928	1.80395	-0.626986	0.0520415	0.564139	-0.79908	-0.803517	-0.626986	0.355705	0.804427	-0.268334	-0.269587	-0.626986	0.751738	1	-0.530746	-0.53393	-0.626986	0.539074	1	0.990204	1.00043
102633924	Gm31630	predicted gene, 31630	-1.19389	-1.19626	1.1305	0.0355395	0.179264	-1.76053	-1.76493	1.1305	0.0037062	0.0302934	0.56664	0.568665	1.1305	0.318389	1	1.10141	1.10474	1.1305	0.0566495	0.392809	0.17325	0.173741	1.1305	0.752851	1	0.357393	0.357912	1.1305	0.504197	1	-0.659126	-0.66019	1.1305	0.224851	0.648917	-1.02064	-1.02252	1.1305	0.0671459	0.315178	0.361518	0.362332	1.1305	0.50777	1	-0.301732	-0.302278
102634020	Gm31706	predicted gene, 31706	-1.4593	-1.46236	1.07677	0.00362714	0.0340181	-1.41117	-1.41407	1.07677	0.00465564	0.0362491	-0.0481308	-0.0482916	1.07677	0.918868	1	0.948679	0.95092	1.07677	0.0482353	0.361292	0.20811	0.208772	1.07677	0.657875	1	1.14125	1.14336	1.07677	0.0178035	0.352257	-0.462489	-0.46315	1.07677	0.310786	0.758493	-1.25119	-1.25359	1.07677	0.0102446	0.0903929	0.7887	0.790439	1.07677	0.0946055	0.567765	0.678764	0.68021
102634034	Gm31718	predicted gene, 31718	-1.15474	-1.16231	-0.424045	0.117336	0.386502	-2.82106	-2.85878	-0.424045	0.0013204	0.0139156	1.66632	1.69647	-0.424045	0.0410533	0.723329	2.33892	2.37417	-0.424045	0.00587241	0.108885	0.401721	0.404949	-0.424045	0.579223	1	-0.395247	-0.396731	-0.424045	0.574363	1	-0.48214	-0.484606	-0.424045	0.497722	0.915869	-0.753017	-0.757358	-0.424045	0.294566	0.705795	0.270878	0.272751	-0.424045	0.705137	1	-0.877387	-0.881337
102634039	Gm20687	predicted gene 20687	0.47046	0.470563	4.45497	0.013992	0.0932853	0.504467	0.504576	4.45497	0.007483	0.0518316	-0.0340065	-0.0340127	4.45497	0.914565	1	0.100923	0.10094	4.45497	0.733455	1	-0.147226	-0.147255	4.45497	0.592797	1	-0.128502	-0.128534	4.45497	0.648835	1	0.605389	0.605516	4.45497	0.00101311	0.0165639	0.323234	0.323308	4.45497	0.130949	0.463303	0.282155	0.282208	4.45497	0.208637	0.791298	0.476888	0.476983
102634064	Gm31740	predicted gene, 31740	-2.0811	-2.09034	0.386975	0.000696683	0.00953515	-1.36973	-1.37425	0.386975	0.0145155	0.0841223	-0.711367	-0.716091	0.386975	0.201667	1	0.1529	0.153647	0.386975	0.775288	1	1.00796	1.01403	0.386975	0.073248	0.508633	0.367226	0.368062	0.386975	0.478913	1	-1.21683	-1.22061	0.386975	0.027211	0.183183	-1.07313	-1.07631	0.386975	0.0481498	0.255207	-0.143697	-0.144293	0.386975	0.787057	1	-0.849606	-0.852543
102634078	LOC102634078	uncharacterized LOC102634078	-0.695248	-0.696937	0.760421	0.148386	0.44707	-2.13717	-2.14647	0.760421	0.000191524	0.0030162	1.44192	1.44953	0.760421	0.00703598	0.314162	2.10347	2.1127	0.760421	0.000237924	0.0125033	0.247399	0.248109	0.760421	0.603783	1	0.661899	0.663498	0.760421	0.167111	0.87629	-0.0336992	-0.0337645	0.760421	0.942558	1	-0.447848	-0.448828	0.760421	0.343239	0.753823	0.414149	0.415064	0.760421	0.382476	0.958231	0.6282	0.629733
102634155	Gm17025	predicted gene 17025	-1.71373	-1.71907	0.457192	0.00596791	0.0495975	-3.42928	-3.45243	0.457192	1.30176e-05	0.000318265	1.71556	1.73336	0.457192	0.0111668	0.420963	1.85129	1.86976	0.457192	0.00634152	0.114189	0.309095	0.310593	0.457192	0.594136	1	0.237097	0.23753	0.457192	0.669802	1	-1.57799	-1.58268	0.457192	0.00968738	0.0891898	-1.40463	-1.40848	0.457192	0.0190683	0.140512	-0.173358	-0.1742	0.457192	0.762169	1	-1.34089	-1.34515
102634189	Gm31832	predicted gene, 31832	-0.0796095	-0.0806396	-1.68792	0.947173	1	-0.555189	-0.564585	-1.68792	0.64946	0.921423	0.475579	0.483945	-1.68792	0.699297	1	0.822789	0.835273	-1.68792	0.503899	0.981799	-6.19449	-1.44269e+08	-1.68792	0.0028733	0.0744864	1.03608	1.05651	-1.68792	0.408117	1	0.2676	0.270688	-1.68792	0.822661	1	-6.2741	-1.44269e+08	-1.68792	0.00251708	0.0332954	6.5417	1.44269e+08	-1.68792	0.001816	0.0597272	1.30368	1.3272
102634193	Gm31835	predicted gene, 31835	-2.98375	-3.01784	-0.625436	0.00581702	0.0487838	-0.502492	-0.504517	-0.625436	0.576759	0.87449	-2.48125	-2.51332	-0.625436	0.0185722	0.522235	-1.82351	-1.84097	-0.625436	0.0651277	0.425365	1.19578	1.21825	-0.625436	0.230967	0.817786	1.5229	1.5321	-0.625436	0.10761	0.760625	-2.326	-2.34549	-0.625436	0.0212927	0.154126	-1.78797	-1.79959	-0.625436	0.0633759	0.304351	-0.538032	-0.5459	-0.625436	0.572206	1	-0.8031	-0.813387
102634229	Gm31862	predicted gene, 31862	-0.435529	-0.436478	0.266608	0.521918	0.861472	-1.10743	-1.11055	0.266608	0.115668	0.349759	0.6719	0.674072	0.266608	0.337899	1	-0.317729	-0.319136	0.266608	0.648617	1	-2.4626	-2.47915	0.266608	0.00248216	0.0670425	1.71201	1.71828	0.266608	0.020018	0.372239	-1.42516	-1.42969	0.266608	0.0465191	0.262974	-2.89813	-2.91563	0.266608	0.000550266	0.0104146	1.47297	1.48594	0.266608	0.0513778	0.425523	0.286851	0.288593
102634293	Gm31914	predicted gene, 31914	-1.59799	-1.59993	1.69926	7.14631e-05	0.00148605	-1.57794	-1.57985	1.69926	8.55115e-05	0.00157196	-0.0200494	-0.0200847	1.69926	0.955265	1	0.25793	0.258397	1.69926	0.468161	0.956148	0.581142	0.582101	1.69926	0.10759	0.602898	1.70681	1.70898	1.69926	3.09641e-05	0.00721462	-1.32001	-1.32145	1.69926	0.000556821	0.0103842	-1.01685	-1.01783	1.69926	0.00549964	0.0584703	-0.303163	-0.303619	1.69926	0.387384	0.962562	0.386807	0.387533
102634300	LOC102634300	uncharacterized LOC102634300	-1.75635	-1.76004	1.39544	0.000120501	0.00226031	-1.12955	-1.13139	1.39544	0.00648077	0.046609	-0.626794	-0.628644	1.39544	0.127902	0.990117	0.502756	0.503754	1.39544	0.207458	0.712055	1.2332	1.23622	1.39544	0.00399156	0.0921155	0.6315	0.632352	1.39544	0.10911	0.76337	-0.626796	-0.62764	1.39544	0.111147	0.448462	-0.523147	-0.523821	1.39544	0.181413	0.555668	-0.103649	-0.10382	1.39544	0.790519	1	0.00470409	0.00471131
102634303	Gm31920	predicted gene, 31920	-1.80275	-1.83698	-1.94889	0.140551	0.43358	-3.33551	-3.46556	-1.94889	0.0175064	0.0961336	1.53276	1.62858	-1.94889	0.256855	1	2.40672	2.52427	-1.94889	0.0765184	0.458707	-3.0115	-3.42049	-1.94889	0.0519622	0.431286	1.01508	1.02918	-1.94889	0.38134	1	-0.928789	-0.941292	-1.94889	0.420223	0.858938	-4.81426	-5.25747	-1.94889	0.0031014	0.0385463	3.88547	4.31617	-1.94889	0.0134823	0.202119	0.0862901	0.0878916
102634428	Gm32013	predicted gene, 32013	-3.62816	-3.77833	-1.25076	0.00540041	0.0461039	0.517573	0.521336	-1.25076	0.597475	0.889018	-4.14573	-4.29967	-1.25076	0.00204594	0.150443	-0.590199	-0.594647	-1.25076	0.550591	1	2.51023	2.6457	-1.25076	0.0452026	0.398438	2.00132	2.03905	-1.25076	0.0668553	0.637532	-0.0726258	-0.0733115	-1.25076	0.941076	1	-1.11793	-1.13263	-1.25076	0.273883	0.682314	1.0453	1.05932	-1.25076	0.308404	0.897914	1.9287	1.96573
102634481	LOC102634481	uncharacterized LOC102634481	-1.76319	-1.76476	2.22978	7.56583e-05	0.00155821	-1.3085	-1.30947	2.22978	0.00156855	0.0158568	-0.454684	-0.455286	2.22978	0.250521	1	0.000797051	0.000797773	2.22978	0.998327	1	-0.0314163	-0.0314796	2.22978	0.936652	1	0.998212	0.998865	2.22978	0.011803	0.293015	-1.30771	-1.30867	2.22978	0.00149691	0.0222854	-1.7946	-1.79624	2.22978	5.8692e-05	0.00175704	0.486897	0.487563	2.22978	0.215134	0.800153	-0.309494	-0.309809
102634520	Gm32081	predicted gene, 32081	0.865532	0.871285	0.26296	0.257463	0.60802	2.56393	2.57454	0.26296	0.00236922	0.0216679	-1.6984	-1.70325	0.26296	0.0292219	0.637209	-0.468319	-0.469149	0.26296	0.514316	0.987035	-1.16427	-1.17256	0.26296	0.136635	0.671252	1.99455	2.03395	0.26296	0.028108	0.432435	2.09561	2.10539	0.26296	0.00984271	0.0899986	-0.298742	-0.301272	0.26296	0.697391	0.991242	2.39435	2.40666	0.26296	0.00432857	0.104178	4.09016	4.13934
102634534	Gm32091	predicted gene, 32091	-1.01311	-1.01446	1.56543	0.0288105	0.154941	-1.67823	-1.68116	1.56543	0.000895909	0.0102521	0.665121	0.666698	1.56543	0.155099	1	1.27701	1.27951	1.56543	0.00837947	0.135721	-0.0147088	-0.0147527	1.56543	0.973982	1	0.846934	0.847992	1.56543	0.0626586	0.620141	-0.401221	-0.401647	1.56543	0.363277	0.811718	-1.02782	-1.02921	1.56543	0.0263379	0.174319	0.626598	0.627568	1.56543	0.165645	0.725896	0.445713	0.446345
102634578	Gm32124	predicted gene, 32124	-2.45908	-2.49819	-1.55134	0.0904839	0.327445	-7.41141	-1.44269e+08	-1.55134	0.00170034	0.0168803	4.95233	1.44269e+08	-1.55134	0.0296458	0.641297	4.96324	1.44269e+08	-1.55134	0.0288296	0.280028	0.869407	0.891861	-1.55134	0.532451	1	1.43708	1.4518	-1.55134	0.28604	1	-2.44816	-2.48666	-1.55134	0.0901218	0.399491	-1.58967	-1.60632	-1.55134	0.238962	0.641665	-0.858494	-0.880333	-1.55134	0.534952	1	-1.01108	-1.03486
102634635	Gm32172	predicted gene, 32172	-0.876946	-0.887789	-1.83239	0.492966	0.841533	-6.73187	-10.9268	-1.83239	0.00212627	0.0200683	5.85492	10.039	-1.83239	0.00659003	0.304733	5.8321	10.0157	-1.83239	0.00676627	0.118658	-1.0093	-1.03443	-1.83239	0.450985	1	2.55207	2.6139	-1.83239	0.072698	0.660671	-0.899764	-0.911115	-1.83239	0.481807	0.905169	-1.88625	-1.92222	-1.83239	0.163765	0.525827	0.986487	1.01111	-1.83239	0.460951	1	1.65231	1.70279
102634788	Gm32289	predicted gene, 32289	-0.950767	-0.962325	-1.19643	0.378272	0.747079	-1.21006	-1.22643	-1.19643	0.270488	0.58953	0.259292	0.264109	-1.19643	0.81398	1	1.82007	1.84069	-1.19643	0.105511	0.529033	0.348048	0.352944	-1.19643	0.748516	1	3.07785	3.17357	-1.19643	0.0170643	0.344474	0.610012	0.614252	-1.19643	0.557918	0.953514	-0.602719	-0.60938	-1.19643	0.57035	0.928462	1.21273	1.22363	-1.19643	0.260611	0.856808	3.68786	3.78782
102634835	LOC102634835	uncharacterized LOC102634835	-1.04138	-1.04156	4.62312	1.75921e-06	7.07303e-05	-0.823334	-0.823469	4.62312	5.65807e-05	0.00110527	-0.218045	-0.218096	4.62312	0.367296	1	0.292572	0.292629	4.62312	0.200115	0.703082	0.219368	0.21942	4.62312	0.363907	0.955477	0.409257	0.409314	4.62312	0.0527816	0.56993	-0.530762	-0.53084	4.62312	0.00892387	0.0840617	-0.822011	-0.822145	4.62312	5.64002e-05	0.00170425	0.291249	0.291305	4.62312	0.202344	0.784038	-0.121505	-0.121525
102634906	Gm32379	predicted gene, 32379	-0.535499	-0.539418	-0.696805	0.521887	0.861472	-0.170364	-0.171463	-0.696805	0.836628	1	-0.365136	-0.367954	-0.696805	0.663603	1	-0.488685	-0.492642	-0.696805	0.561664	1	-2.47111	-2.52724	-0.696805	0.0133133	0.197443	-0.18247	-0.18348	-0.696805	0.824284	1	-0.659049	-0.664106	-0.696805	0.432387	0.869344	-3.00661	-3.06666	-0.696805	0.00342518	0.0414256	2.34756	2.40255	-0.696805	0.0178514	0.238099	-0.841519	-0.847586
102634933	Gm26871	predicted gene, 26871	-1.16395	-1.16413	4.7517	1.28231e-07	8.07774e-06	-0.859091	-0.859209	4.7517	1.78738e-05	0.000411502	-0.304862	-0.304924	4.7517	0.174382	1	0.461213	0.461285	4.7517	0.0232053	0.249176	-0.0776704	-0.0776878	4.7517	0.776221	1	0.946297	0.946432	4.7517	3.85509e-06	0.00162073	-0.397878	-0.397924	4.7517	0.0557047	0.294256	-1.24162	-1.24182	4.7517	3.57187e-08	3.59773e-06	0.843745	0.843897	4.7517	2.57889e-05	0.0030044	0.548419	0.548507
102634982	Gm32431	predicted gene, 32431	2.87781	3.0512	-1.70389	0.0777161	0.297909	1.84274	1.98884	-1.70389	0.255708	0.571758	1.03507	1.06236	-1.70389	0.473703	1	1.80326	1.84102	-1.70389	0.214339	0.721792	-5.82966	-12.4321	-1.70389	0.009484	0.160359	-4.08803	-4.27586	-1.70389	0.0162776	0.336318	3.646	3.82986	-1.70389	0.0287425	0.190884	-2.95184	-9.38086	-1.70389	0.173196	0.541541	6.59785	13.2107	-1.70389	0.0037882	0.0960157	-0.442025	-0.446002
102635066	Gm32497	predicted gene, 32497	-1.13501	-1.1361	2.26213	0.00352488	0.0332039	-1.01494	-1.01588	2.26213	0.00799869	0.054544	-0.120065	-0.120226	2.26213	0.745621	1	0.603763	0.604394	2.26213	0.10576	0.529183	0.307655	0.308053	2.26213	0.40501	0.981885	0.313485	0.313708	2.26213	0.382073	1	-0.41118	-0.411481	2.26213	0.255032	0.692998	-0.827353	-0.828048	2.26213	0.0267793	0.175853	0.416173	0.416567	2.26213	0.255559	0.850735	-0.0976946	-0.097773
102635071	Gm26944	predicted gene, 26944	-1.67095	-1.67183	2.78333	0.000215454	0.00370371	-2.13487	-2.13624	2.78333	1.29065e-05	0.000316349	0.463919	0.464405	2.78333	0.263994	1	0.735556	0.736261	2.78333	0.0775624	0.462693	0.209277	0.20945	2.78333	0.605563	1	1.54807	1.54884	2.78333	0.000457244	0.0465828	-1.39932	-1.39998	2.78333	0.00116704	0.0183491	-1.46168	-1.46238	2.78333	0.000802891	0.0139132	0.0623599	0.062406	2.78333	0.876338	1	0.148749	0.148863
102635165	LOC102635165	uncharacterized LOC102635165	-0.0325428	-0.0325917	1.90364	0.92992	1	0.867984	0.868963	1.90364	0.0226346	0.115557	-0.900527	-0.901555	1.90364	0.019121	0.525257	-0.0258813	-0.0259026	1.90364	0.943044	1	0.332656	0.333111	1.90364	0.372685	0.961199	0.472242	0.473086	1.90364	0.213469	0.942918	0.842103	0.843061	1.90364	0.0266366	0.180873	0.300113	0.30052	1.90364	0.416947	0.822286	0.54199	0.542541	1.90364	0.146001	0.683495	1.31434	1.31615
102635197	Gm32597	predicted gene, 32597	-2.19161	-2.23531	-1.48516	0.127132	0.406614	-0.640056	-0.647262	-1.48516	0.628769	0.909387	-1.55156	-1.58804	-1.48516	0.274992	1	-0.868867	-0.885502	-1.48516	0.527829	0.994608	-4.62816	-9.12431	-1.48516	0.0336723	0.336358	-0.349169	-0.351703	-1.48516	0.78794	1	-1.50892	-1.53276	-1.48516	0.274186	0.718105	-6.81977	-11.3596	-1.48516	0.00250653	0.0331901	5.31085	9.82685	-1.48516	0.0157294	0.22123	-1.85809	-1.88447
102635200	LOC102635200	uncharacterized LOC102635200	-0.640181	-0.641837	0.630953	0.234477	0.577356	0.000880385	0.000891422	0.630953	0.998662	1	-0.641061	-0.642728	0.630953	0.23619	1	0.0443507	0.0444134	0.630953	0.933014	1	0.140619	0.141085	0.630953	0.793819	1	2.57762	2.59172	0.630953	9.69128e-05	0.0165858	0.0452311	0.0453048	0.630953	0.931327	1	-0.499562	-0.500752	0.630953	0.350564	0.760833	0.544793	0.546057	0.630953	0.310429	0.89898	2.62285	2.63702
102635257	Gm32643	predicted gene, 32643	-1.53315	-1.53475	2.02814	0.000377663	0.0058464	-1.09347	-1.09442	2.02814	0.0068573	0.0486476	-0.439686	-0.440326	2.02814	0.266519	1	0.257319	0.257614	2.02814	0.507141	0.984071	0.214407	0.214757	2.02814	0.585925	1	1.23234	1.23348	2.02814	0.0026799	0.134081	-0.836147	-0.83681	2.02814	0.0329578	0.209248	-1.31874	-1.31999	2.02814	0.0015051	0.0225462	0.482597	0.483183	2.02814	0.216336	0.801328	0.396192	0.396666
102635276	Gm32657	predicted gene, 32657	-1.53299	-1.53646	0.919504	0.00212991	0.0224104	-1.12305	-1.12521	0.919504	0.0178707	0.0976275	-0.409941	-0.41125	0.919504	0.378333	1	0.05575	0.0559132	0.919504	0.902204	1	0.655523	0.657459	0.919504	0.159826	0.707712	1.41552	1.41854	0.919504	0.00388234	0.166575	-1.0673	-1.06929	0.919504	0.0223423	0.159511	-0.877462	-0.878999	0.919504	0.0570103	0.284742	-0.189833	-0.190296	0.919504	0.673734	1	0.348227	0.349243
102635290	Ttc39aos1	Ttc39a opposite strand RNA 1	0.0770032	0.0771018	1.7125	0.836854	1	-0.0198408	-0.0198725	1.7125	0.957739	1	0.0968441	0.0969743	1.7125	0.797129	1	0.708972	0.709745	1.7125	0.0647494	0.424039	-0.510494	-0.511287	1.7125	0.184257	0.751917	0.844782	0.846359	1.7125	0.0319697	0.45953	0.689132	0.689872	1.7125	0.0704932	0.342272	-0.433491	-0.434186	1.7125	0.256385	0.661804	1.12262	1.12406	1.7125	0.00503408	0.114413	1.53391	1.53623
102635300	Gm20501	predicted gene 20501	-1.02242	-1.02297	3.19224	8.11447e-05	0.00165011	-0.190387	-0.190461	3.19224	0.451255	0.774479	-0.832036	-0.832505	3.19224	0.000894348	0.0847833	-0.657947	-0.658295	3.19224	0.00682084	0.119047	0.441837	0.442118	3.19224	0.0727247	0.507002	0.0414727	0.0414882	3.19224	0.872012	1	-0.848334	-0.848756	3.19224	0.000591102	0.0108663	-0.580586	-0.580849	3.19224	0.0157691	0.123116	-0.267748	-0.267907	3.19224	0.285361	0.880896	-0.806861	-0.807268
102635305	Gm15991	predicted gene 15991	-1.20217	-1.20443	1.6426	0.00321086	0.0310009	-0.543375	-0.544168	1.6426	0.153595	0.419722	-0.658793	-0.660263	1.6426	0.0937889	0.926345	0.614113	0.61499	1.6426	0.108075	0.533587	1.12591	1.12808	1.6426	0.00551274	0.1139	0.222176	0.222465	1.6426	0.550623	1	0.0707385	0.0708217	1.6426	0.847912	1	-0.0762526	-0.0763521	1.6426	0.836815	1	0.146991	0.147174	1.6426	0.691815	1	0.292914	0.293287
102635360	Gm32719	predicted gene, 32719	-1.74197	-1.75184	-0.314362	0.0572883	0.244731	-3.21931	-3.25451	-0.314362	0.00250109	0.0225074	1.47733	1.50267	-0.314362	0.131449	0.997577	2.85218	2.88617	-0.314362	0.00600939	0.110471	-0.18563	-0.187307	-0.314362	0.835184	1	1.42848	1.43564	-0.314362	0.109892	0.765386	-0.367134	-0.368342	-0.314362	0.663322	0.997976	-1.92761	-1.93915	-0.314362	0.0373873	0.217453	1.56047	1.5708	-0.314362	0.0855207	0.54422	1.06134	1.0673
102635455	Gm32788	predicted gene, 32788	-5.18058	-5.538	-1.70462	0.00143394	0.0166353	-4.55087	-4.77679	-1.70462	0.00282934	0.0246693	-0.629715	-0.761202	-1.70462	0.698782	1	1.03345	1.15936	-1.70462	0.469891	0.95764	3.34382	3.67807	-1.70462	0.0269728	0.295205	0.551061	0.555301	-1.70462	0.616854	1	-3.51742	-3.61744	-1.70462	0.0096378	0.0889244	-1.83676	-1.85992	-1.70462	0.116484	0.433125	-1.68066	-1.75751	-1.70462	0.182301	0.753788	-2.96636	-3.06214
102635536	Gm14055	predicted gene 14055	-1.8174	-1.84441	-1.48758	0.103097	0.35578	-4.8759	-5.20371	-1.48758	0.00131453	0.0138689	3.0585	3.35931	-1.48758	0.0313472	0.654761	3.15643	3.45975	-1.48758	0.0262898	0.266187	1.73723	1.7636	-1.48758	0.119845	0.633007	0.811626	0.819703	-1.48758	0.440317	1	-1.71947	-1.74397	-1.48758	0.119301	0.465955	-0.080168	-0.080809	-1.48758	0.938152	1	-1.6393	-1.66316	-1.48758	0.138294	0.669309	-0.907846	-0.924262
102635541	Gm32849	predicted gene, 32849	-1.67352	-1.67626	1.39256	0.000545306	0.00779429	-1.80854	-1.81167	1.39256	0.000253436	0.00376436	0.13502	0.135416	1.39256	0.760966	1	1.02921	1.03145	1.39256	0.0237161	0.252697	0.405011	0.405966	1.39256	0.358074	0.951599	1.31754	1.3194	1.39256	0.00410407	0.170814	-0.779328	-0.780223	1.39256	0.0722312	0.347051	-1.26851	-1.27029	1.39256	0.00547817	0.0583383	0.489185	0.490066	1.39256	0.260085	0.856279	0.538216	0.539178
102635561	Ggnbp2os	gametogenetin binding protein 2, opposite strand	-1.00846	-1.0096	1.88905	0.00753952	0.0593918	-0.923929	-0.924938	1.88905	0.0133744	0.0793187	-0.0845338	-0.0846602	1.88905	0.815397	1	-0.181947	-0.182234	1.88905	0.61576	1	0.613737	0.614515	1.88905	0.0955923	0.572341	0.719377	0.720107	1.88905	0.0491499	0.554698	-1.10588	-1.10717	1.88905	0.00373798	0.0440248	-0.394725	-0.395084	1.88905	0.266432	0.673983	-0.71115	-0.712088	1.88905	0.0546596	0.438615	-0.386498	-0.387065
102635572	Gm38480	predicted gene, 38480	0.71781	0.719302	1.21923	0.168125	0.479149	0.7345	0.736019	1.21923	0.159138	0.429169	-0.0166905	-0.0167171	1.21923	0.973856	1	0.277386	0.277788	1.21923	0.585082	1	-0.314529	-0.315088	1.21923	0.539069	1	0.885706	0.888931	1.21923	0.10228	0.749521	1.01189	1.01381	1.21923	0.0553026	0.292918	0.403281	0.404214	1.21923	0.434177	0.835224	0.608605	0.609593	1.21923	0.236899	0.829273	1.89759	1.90274
102635661	LOC102635661	myosin light polypeptide 6-like	-0.248528	-0.249059	0.735634	0.603196	0.915478	-1.52034	-1.52563	0.735634	0.00437738	0.0343843	1.27182	1.27657	0.735634	0.0151231	0.483247	1.37593	1.38092	0.735634	0.00903595	0.142302	-1.17101	-1.17521	0.735634	0.0231149	0.269246	0.405635	0.406553	0.735634	0.398335	1	-0.144412	-0.14471	0.735634	0.761417	1	-1.41954	-1.42427	0.735634	0.00682453	0.067821	1.27513	1.27956	0.735634	0.0139572	0.20659	0.261223	0.261843
102635744	Gm28729	predicted gene 28729	-0.69772	-0.69978	0.711556	0.193118	0.518278	-0.252267	-0.252888	0.711556	0.629692	0.909871	-0.445453	-0.446892	0.711556	0.404557	1	0.718492	0.720025	0.711556	0.175962	0.664765	0.00578179	0.00582277	0.711556	0.991318	1	1.32838	1.33342	0.711556	0.019384	0.367954	0.466225	0.467137	0.711556	0.371395	0.818545	-0.691938	-0.693958	0.711556	0.195126	0.57779	1.15816	1.16109	0.711556	0.0351341	0.34741	1.79461	1.80055
102635781	Gm38481	predicted gene, 38481	-0.305957	-0.305977	5.8927	0.30262	0.665012	-1.10283	-1.10292	5.8927	0.000711092	0.00852561	0.796869	0.796946	5.8927	0.0110469	0.418073	0.217285	0.21731	5.8927	0.47116	0.958245	-0.576132	-0.576184	5.8927	0.0579408	0.458521	-0.503407	-0.503432	5.8927	0.0904173	0.710014	-0.885541	-0.885613	5.8927	0.00491944	0.0539326	-0.882089	-0.882161	5.8927	0.00515538	0.0557606	-0.00345213	-0.00345159	5.8927	0.990834	1	-1.38895	-1.38904
102635783	Gm11266	predicted gene 11266	-0.547868	-0.547946	5.00024	0.00184321	0.0200821	-0.215944	-0.215971	5.00024	0.391584	0.720425	-0.331924	-0.331975	5.00024	0.107947	0.956975	0.0385635	0.0385686	5.00024	0.915354	1	0.304451	0.304498	5.00024	0.155671	0.702315	0.244112	0.244143	5.00024	0.304584	1	-0.17738	-0.177403	5.00024	0.520004	0.930029	-0.243416	-0.243448	5.00024	0.306616	0.718721	0.0660359	0.066045	5.00024	0.850545	1	0.0667315	0.0667404
102635844	LOC102635844	uncharacterized LOC102635844	0.311474	0.311592	3.51207	0.273881	0.628675	0.512918	0.5131	3.51207	0.0722864	0.256692	-0.201444	-0.201508	3.51207	0.479334	1	0.0173214	0.0173266	3.51207	0.951478	1	-0.35907	-0.359208	3.51207	0.208514	0.787898	0.680563	0.680932	3.51207	0.0203192	0.374235	0.530239	0.530427	3.51207	0.0633208	0.318794	-0.0475959	-0.0476162	3.51207	0.867623	1	0.577835	0.578043	3.51207	0.0443052	0.39394	1.2108	1.21136
102635867	Gm33097	predicted gene, 33097	-2.47838	-2.48842	0.458669	0.00115502	0.0141822	-1.75671	-1.76193	0.458669	0.0122892	0.0745485	-0.721672	-0.726497	0.458669	0.294475	1	1.11757	1.12157	0.458669	0.0968783	0.507869	0.57852	0.582685	0.458669	0.397096	0.977712	1.97967	1.98611	0.458669	0.00573924	0.204082	-0.639139	-0.640357	0.458669	0.317528	0.765066	-1.89986	-1.90574	0.458669	0.00737407	0.0714823	1.26073	1.26538	0.458669	0.0627805	0.464643	1.34053	1.34576
102635912	LOC102635912	uncharacterized LOC102635912	-0.599458	-0.600288	1.49071	0.137423	0.427408	-1.45143	-1.45422	1.49071	0.00104963	0.0116126	0.85197	0.853934	1.49071	0.0429019	0.729069	0.385115	0.386142	1.49071	0.349785	0.872612	0.00302128	0.0030187	1.49071	0.994	1	-0.0731121	-0.0731915	1.49071	0.852696	1	-1.06631	-1.06808	1.49071	0.0109609	0.0970384	-0.596436	-0.59727	1.49071	0.137797	0.476955	-0.469876	-0.470811	1.49071	0.247169	0.842566	-1.13942	-1.14127
102636025	Gm33214	predicted gene, 33214	-0.932019	-0.933063	1.81072	0.0109483	0.0781863	-0.698917	-0.699632	1.81072	0.0509461	0.20185	-0.233101	-0.23343	1.81072	0.507907	1	-0.301933	-0.302369	1.81072	0.392317	0.902545	-0.282576	-0.283042	1.81072	0.426318	0.996073	0.592798	0.593385	1.81072	0.094457	0.724889	-1.00085	-1.002	1.81072	0.00666456	0.0673034	-1.21459	-1.2161	1.81072	0.00137354	0.0208992	0.213744	0.214103	1.81072	0.546268	1	-0.408052	-0.408616
102636042	Gm33224	predicted gene, 33224	0.886762	0.894347	-0.0758613	0.188873	0.511785	1.25819	1.26779	-0.0758613	0.0658544	0.24145	-0.371425	-0.373443	-0.0758613	0.569355	1	1.07208	1.07571	-0.0758613	0.10379	0.525396	0.184296	0.185391	-0.0758613	0.777225	1	-0.713796	-0.720237	-0.0758613	0.286367	1	2.33027	2.3435	-0.0758613	0.00168855	0.0242607	1.07106	1.07974	-0.0758613	0.113571	0.427553	1.25921	1.26376	-0.0758613	0.0593045	0.45466	1.61648	1.62326
102636081	Gm33253	predicted gene, 33253	0.128822	0.129082	1.76822	0.754984	0.992836	1.40881	1.41072	1.76822	0.00145749	0.0149372	-1.27999	-1.28164	1.76822	0.00342132	0.204213	-0.132745	-0.132857	1.76822	0.739962	1	0.677739	0.678786	1.76822	0.103973	0.592615	0.287139	0.287845	1.76822	0.491412	1	1.27607	1.27787	1.76822	0.00335374	0.0406206	0.80656	0.807869	1.76822	0.0539499	0.274707	0.469505	0.469998	1.76822	0.246669	0.842566	1.5632	1.56571
102636107	Gm33272	predicted gene, 33272	-1.49332	-1.49411	3.02839	3.21253e-07	1.70679e-05	-1.40098	-1.40169	3.02839	9.11063e-07	3.35601e-05	-0.0923471	-0.0924228	3.02839	0.723017	1	0.709571	0.710017	3.02839	0.00437797	0.0921279	0.854521	0.855066	3.02839	0.000795062	0.030416	1.69446	1.69543	3.02839	3.62578e-08	4.6746e-05	-0.691405	-0.691672	3.02839	0.0045736	0.051097	-0.638803	-0.639045	3.02839	0.00854704	0.0793906	-0.0526024	-0.052627	3.02839	0.838916	1	1.00305	1.00376
102636149	Gm16013	predicted gene 16013	-1.95094	-1.95939	0.625863	0.00160693	0.0180782	-3.30925	-3.33555	0.625863	1.11487e-05	0.000279643	1.35831	1.37617	0.625863	0.0357379	0.679133	0.575855	0.585552	0.625863	0.369785	0.887698	1.84285	1.85107	0.625863	0.00264723	0.0698429	-0.658908	-0.65998	0.625863	0.215081	0.945943	-2.7334	-2.75	0.625863	7.51916e-05	0.00207141	-0.10809	-0.108317	0.625863	0.837432	1	-2.62531	-2.64169	0.625863	0.00012212	0.0091538	-3.3923	-3.40998
102636154	Gm16124	predicted gene 16124	-0.0996275	-0.0998402	0.726039	0.840382	1	-0.380075	-0.380971	0.726039	0.446381	0.770488	0.280448	0.28113	0.726039	0.575605	1	-0.0861151	-0.0863475	0.726039	0.863611	1	-1.54751	-1.55356	0.726039	0.00533299	0.11244	0.558038	0.55942	0.726039	0.266577	0.996284	-0.46619	-0.467318	0.726039	0.3512	0.80036	-1.64714	-1.6534	0.726039	0.00318633	0.039349	1.18095	1.18608	0.726039	0.0282662	0.311299	0.0918476	0.0921017
102636221	Gm33350	predicted gene, 33350	-0.367093	-0.368495	0.169212	0.535702	0.871832	-0.543123	-0.545337	0.169212	0.363602	0.69162	0.17603	0.176843	0.169212	0.76878	1	0.98934	0.992846	0.169212	0.104787	0.527591	-0.154069	-0.154824	0.169212	0.796582	1	1.58506	1.59486	0.169212	0.0150042	0.326764	0.446217	0.447508	0.169212	0.447472	0.881584	-0.521162	-0.523319	0.169212	0.382309	0.790916	0.967378	0.970827	0.169212	0.111789	0.608086	2.03128	2.04236
102636251	Gm33370	predicted gene, 33370	2.9405	2.95141	-0.62481	0.00744029	0.0588258	2.40344	2.41346	-0.62481	0.025417	0.125649	0.537057	0.537945	-0.62481	0.570253	1	-1.44173	-1.44584	-0.62481	0.141982	0.60407	-5.4018	-5.4712	-0.62481	5.38389e-05	0.00414817	0.708624	0.71665	-0.62481	0.468422	1	0.961713	0.96762	-0.62481	0.329233	0.777605	-2.4613	-2.51979	-0.62481	0.0243275	0.1655	3.42301	3.48741	-0.62481	0.00278499	0.079673	1.67034	1.68427
102636258	Gm11802	predicted gene 11802	-1.15159	-1.15453	0.245347	0.104152	0.357824	-1.6081	-1.61291	0.245347	0.0279879	0.134876	0.456508	0.458372	0.245347	0.515418	1	-0.384907	-0.38748	0.245347	0.593843	1	-1.15078	-1.15733	0.245347	0.11941	0.632556	1.73491	1.74041	0.245347	0.0196044	0.369162	-1.993	-2.00039	0.245347	0.00995723	0.0907032	-2.30237	-2.31187	0.245347	0.00365886	0.0435706	0.309365	0.31148	0.245347	0.676087	1	-0.258092	-0.259981
102636263	Gm33377	predicted gene, 33377	0.238622	0.243175	-1.75712	0.876886	1	-0.093839	-0.0957108	-1.75712	0.951919	1	0.332461	0.338886	-1.75712	0.831378	1	1.57311	1.59361	-1.75712	0.318128	0.848006	-0.741589	-0.758054	-1.75712	0.63886	1	5.65452	1.44269e+08	-1.75712	0.0238579	0.404018	1.47927	1.49789	-1.75712	0.340785	0.7903	-0.502967	-0.514879	-1.75712	0.748904	1	1.98223	2.01277	-1.75712	0.218372	0.803634	7.13379	1.44269e+08
102636264	Gm33378	predicted gene, 33378	0.00906917	0.00907107	4.40195	0.972269	1	-0.709443	-0.709616	4.40195	0.00510705	0.0390068	0.718512	0.718687	4.40195	0.00473319	0.244747	0.917633	0.917842	4.40195	0.000459237	0.0196922	-0.488644	-0.488752	4.40195	0.0511557	0.428269	0.194488	0.194526	4.40195	0.449124	1	0.20819	0.208227	4.40195	0.415722	0.854559	-0.479574	-0.479681	4.40195	0.0550425	0.278463	0.687764	0.687908	4.40195	0.00611232	0.126831	0.402678	0.402753
102636280	Gm33392	predicted gene, 33392	-1.56969	-1.57455	0.619711	0.00298879	0.0292659	-1.04741	-1.05005	0.619711	0.0355031	0.159155	-0.522281	-0.524505	0.619711	0.292073	1	0.312378	0.313372	0.619711	0.518853	0.991218	0.687489	0.690264	0.619711	0.166427	0.718262	1.27228	1.27576	0.619711	0.0123554	0.299801	-0.735032	-0.736674	0.619711	0.128575	0.485637	-0.882202	-0.884288	0.619711	0.0715017	0.327904	0.14717	0.147614	0.619711	0.759305	1	0.537244	0.539089
102636397	Gm33473	predicted gene, 33473	-2.86034	-2.87355	0.665208	8.55255e-05	0.00172829	-0.892456	-0.894256	0.665208	0.12209	0.361742	-1.96789	-1.97929	0.665208	0.00324461	0.19886	-0.176384	-0.176887	0.665208	0.757308	1	1.51152	1.52146	0.665208	0.0192551	0.245622	1.21172	1.21448	0.665208	0.0406532	0.510243	-1.06884	-1.07114	0.665208	0.0674683	0.332971	-1.34882	-1.35209	0.665208	0.0245609	0.166427	0.279979	0.280945	0.665208	0.626426	1	0.14288	0.143339
102636594	Gm33613	predicted gene, 33613	-2.98731	-3.01496	-0.26377	0.00266831	0.0267231	-1.5448	-1.55229	-0.26377	0.0728229	0.257934	-1.44251	-1.46266	-0.26377	0.114676	0.975538	0.832557	0.837569	-0.26377	0.320295	0.848946	0.352751	0.360164	-0.26377	0.696696	1	0.788835	0.791684	-0.26377	0.335812	1	-0.712244	-0.714725	-0.26377	0.382724	0.82726	-2.63456	-2.65479	-0.26377	0.00552945	0.0586261	1.92231	1.94007	-0.26377	0.0338261	0.341065	0.076591	0.0769582
102636641	Gm26618	predicted gene, 26618	-0.594808	-0.595463	2.02505	0.202461	0.532923	-0.169747	-0.169931	2.02505	0.712399	0.957018	-0.425061	-0.425532	2.02505	0.363045	1	-0.692359	-0.693257	2.02505	0.144451	0.608411	0.139121	0.139299	2.02505	0.764142	1	-0.829511	-0.830073	2.02505	0.0769394	0.675105	-0.862106	-0.863188	2.02505	0.069915	0.340504	-0.455687	-0.456164	2.02505	0.32487	0.736192	-0.406419	-0.407024	2.02505	0.385043	0.960486	-1.69162	-1.69326
102636665	Gm33669	predicted gene, 33669	2.02836	2.03259	2.1674	0.000111309	0.00211871	2.95189	2.95677	2.1674	7.07573e-07	2.69365e-05	-0.923534	-0.924182	2.1674	0.0368286	0.689216	-0.257043	-0.257184	2.1674	0.54502	1	-0.155339	-0.155497	2.1674	0.719357	1	0.273253	0.274381	2.1674	0.569685	1	2.69485	2.69959	2.1674	2.67277e-06	0.000124852	1.87302	1.87709	2.1674	0.000269987	0.0058931	0.82183	0.822495	2.1674	0.0619063	0.460885	2.9681	2.97397
102636697	Gm33697	predicted gene, 33697	-2.42175	-2.43408	0.187565	0.000582866	0.0082398	-2.02809	-2.03677	0.187565	0.00243138	0.0220961	-0.393658	-0.397309	0.187565	0.530926	1	0.8497	0.854825	0.187565	0.168734	0.653097	1.58938	1.59954	0.187565	0.0150479	0.211645	1.47967	1.48471	0.187565	0.0182819	0.3583	-1.17839	-1.18195	0.187565	0.0530745	0.285669	-0.832371	-0.834544	0.187565	0.160191	0.5191	-0.34602	-0.347405	0.187565	0.557785	1	0.301284	0.302759
102636745	Gm33733	predicted gene, 33733	-0.539225	-0.539622	2.28925	0.166404	0.475831	-0.751791	-0.752391	2.28925	0.0574497	0.218963	0.212565	0.212768	2.28925	0.587241	1	0.311896	0.312183	2.28925	0.424796	0.930615	-0.977562	-0.978798	2.28925	0.0174836	0.233023	0.623283	0.623757	2.28925	0.110794	0.76617	-0.439894	-0.440207	2.28925	0.255409	0.693632	-1.51679	-1.51842	2.28925	0.000484505	0.00944541	1.07689	1.07821	2.28925	0.00927896	0.162689	0.183389	0.183549
102636806	Gm33777	predicted gene, 33777	-1.21897	-1.22153	0.787826	0.0132398	0.0897772	-0.822771	-0.824249	0.787826	0.0824999	0.279465	-0.3962	-0.397276	0.787826	0.401599	1	-0.46577	-0.467064	0.787826	0.324516	0.851882	-0.560666	-0.562813	0.787826	0.245162	0.838584	1.74387	1.7484	0.787826	0.000910991	0.0699113	-1.28854	-1.29131	0.787826	0.00921861	0.0860003	-1.77964	-1.78434	0.787826	0.000764044	0.0133236	0.491095	0.493025	0.787826	0.306668	0.897092	0.455329	0.45709
102636808	Gm38491	predicted gene, 38491	-0.893807	-0.89444	2.5933	0.00789732	0.0615336	-0.856295	-0.856891	2.5933	0.0105532	0.0668487	-0.0375118	-0.0375486	2.5933	0.907318	1	-0.645416	-0.646173	2.5933	0.0523491	0.376927	0.290565	0.290817	2.5933	0.363831	0.955477	-0.44598	-0.446177	2.5933	0.157275	0.859916	-1.50171	-1.50306	2.5933	4.49696e-05	0.0013674	-0.603243	-0.603623	2.5933	0.0600849	0.295745	-0.898469	-0.899441	2.5933	0.00795009	0.148404	-1.94769	-1.94924
102636910	Gm33852	predicted gene, 33852	3.1886	3.21812	0.703159	0.00016617	0.0029618	3.38112	3.41109	0.703159	8.73587e-05	0.00159832	-0.192521	-0.192971	0.703159	0.761201	1	0.451248	0.452091	0.703159	0.474089	0.960244	0.546933	0.548066	0.703159	0.388621	0.973809	-0.160343	-0.164576	0.703159	0.835127	1	3.83237	3.86318	0.703159	1.94648e-05	0.000666248	3.73553	3.76619	0.703159	2.67495e-05	0.000928742	0.0968358	0.0969957	0.703159	0.876425	1	3.67203	3.69861
102637022	Gm33934	predicted gene, 33934	-1.38481	-1.39112	-0.00444608	0.0480799	0.218636	-2.43076	-2.44804	-0.00444608	0.0019686	0.0188937	1.04595	1.05692	-0.00444608	0.148918	1	1.88357	1.89905	-0.00444608	0.0123817	0.171649	0.6638	0.667559	-0.00444608	0.329869	0.92699	0.949687	0.953302	-0.00444608	0.159189	0.861349	-0.547184	-0.548988	-0.00444608	0.406789	0.847634	-0.72101	-0.723561	-0.00444608	0.279057	0.687755	0.173825	0.174573	-0.00444608	0.792824	1	0.402502	0.404314
102637061	Gm33966	predicted gene, 33966	-2.2146	-2.27412	-1.57111	0.155389	0.457847	-3.24261	-3.38273	-1.57111	0.0570534	0.217926	1.02801	1.10861	-1.57111	0.551971	1	-1.37559	-1.66561	-1.57111	0.49625	0.974609	1.75061	1.80393	-1.57111	0.259286	0.854607	-0.944425	-0.95191	-1.57111	0.493209	1	-4.6182	-5.04834	-1.57111	0.018103	0.137832	-0.463988	-0.470196	-1.57111	0.738577	1	-4.15421	-4.57815	-1.57111	0.0320371	0.333279	-5.56263	-6.00025
102637087	Gm33989	predicted gene, 33989	-0.764969	-0.765037	5.61462	8.9489e-05	0.00178599	-1.15671	-1.15683	5.61462	1.22686e-07	6.13083e-06	0.391743	0.391794	5.61462	0.0627099	0.807422	1.13083	1.13094	5.61462	1.90161e-07	8.5524e-05	-0.0780098	-0.078019	5.61462	0.779047	1	0.267366	0.267385	5.61462	0.246	0.975371	-0.0258843	-0.0258861	5.61462	0.929301	1	-0.842979	-0.843056	5.61462	2.06082e-05	0.000764954	0.817095	0.81717	5.61462	3.35949e-05	0.00354086	0.241481	0.241499
102637100	Gm26911	predicted gene, 26911	-1.78953	-1.80482	0.120152	0.00751225	0.0592735	-0.679956	-0.683668	0.120152	0.257079	0.57358	-1.10957	-1.12116	0.120152	0.0861402	0.905361	1.31363	1.31956	0.120152	0.0341224	0.304238	2.23931	2.25628	0.120152	0.00132225	0.0429765	-0.11882	-0.119319	0.120152	0.838128	1	0.633676	0.63589	0.120152	0.278776	0.723658	0.449784	0.451457	0.120152	0.44065	0.840304	0.183892	0.184432	0.120152	0.749918	1	0.514856	0.516571
102637181	Gm38496	predicted gene, 38496	-4.01616	-4.1281	-1.14558	0.00315692	0.0305717	-2.05481	-2.07743	-1.14558	0.0668886	0.24416	-1.96134	-2.05068	-1.14558	0.120613	0.983831	0.176981	0.180511	-1.14558	0.871049	1	2.94288	3.04707	-1.14558	0.0224697	0.265612	1.29775	1.30808	-1.14558	0.220079	0.950447	-1.87783	-1.89691	-1.14558	0.0887847	0.396673	-1.07328	-1.08103	-1.14558	0.303897	0.716809	-0.804553	-0.815883	-1.14558	0.452074	1	-0.580085	-0.588839
102637188	Gm34065	predicted gene, 34065	-0.956454	-0.958249	1.39632	0.0568219	0.243546	-0.260674	-0.261052	1.39632	0.587317	0.880885	-0.69578	-0.697197	1.39632	0.16218	1	-1.03477	-1.03718	1.39632	0.043671	0.34528	0.51737	0.518498	1.39632	0.294638	0.891876	-0.158435	-0.158637	1.39632	0.739445	1	-1.29544	-1.29823	1.39632	0.0128719	0.108655	-0.439084	-0.439751	1.39632	0.362773	0.7708	-0.856359	-0.858476	1.39632	0.0908977	0.556863	-1.45388	-1.45686
102637194	Gm34069	predicted gene, 34069	-2.32965	-2.3705	-1.23369	0.0710556	0.279953	-1.58119	-1.60108	-1.23369	0.194176	0.487558	-0.748465	-0.769425	-1.23369	0.554163	1	1.91272	1.93465	-1.23369	0.121319	0.566981	-2.55447	-2.83314	-1.23369	0.109901	0.607249	1.39799	1.41431	-1.23369	0.242944	0.973739	0.331535	0.333577	-1.23369	0.769767	1	-4.88413	-5.20364	-1.23369	0.00340398	0.0412725	5.21566	5.53722	-1.23369	0.00207871	0.0664466	1.72952	1.74789
102637315	Gm34159	predicted gene, 34159	-1.49198	-1.49454	1.59283	0.0011573	0.0142012	-0.951979	-0.953305	1.59283	0.0260246	0.127901	-0.539999	-0.541237	1.59283	0.207425	1	0.382873	0.383512	1.59283	0.359899	0.879693	0.486116	0.487256	1.59283	0.255508	0.850769	0.0122324	0.0122432	1.59283	0.976035	1	-0.569106	-0.569793	1.59283	0.169798	0.561511	-1.00586	-1.00729	1.59283	0.0192883	0.141455	0.436755	0.437492	1.59283	0.297229	0.889887	-0.556874	-0.55755
102637343	Gm34178	predicted gene, 34178	-2.68921	-2.70246	0.402314	7.77918e-05	0.00159366	-1.96306	-1.97013	0.402314	0.00143948	0.0147843	-0.726146	-0.732338	0.402314	0.216541	1	1.18155	1.18688	0.402314	0.0402647	0.330509	1.31514	1.32454	0.402314	0.0281048	0.30264	1.13925	1.14216	0.402314	0.0413993	0.513548	-0.781512	-0.783246	0.402314	0.149729	0.527216	-1.37407	-1.37792	0.402314	0.0162512	0.125639	0.592557	0.594675	0.402314	0.278702	0.876772	0.357734	0.358911
102637438	Gm34245	predicted gene, 34245	-1.615	-1.61855	0.821981	0.00437124	0.0393737	-1.48961	-1.49273	0.821981	0.00761351	0.0525099	-0.125382	-0.125822	0.821981	0.812625	1	-0.201447	-0.202176	0.821981	0.703116	1	-0.273704	-0.274749	0.821981	0.607297	1	1.06554	1.06743	0.821981	0.045777	0.537804	-1.69106	-1.6949	0.821981	0.0030389	0.0376484	-1.8887	-1.8933	0.821981	0.00124684	0.0194057	0.197639	0.198396	0.821981	0.709797	1	-0.62552	-0.627471
102637583	Gm34354	predicted gene, 34354	-0.662646	-0.662937	2.97308	0.0652376	0.265886	-1.44864	-1.44951	2.97308	0.000268247	0.00394197	0.785999	0.786569	2.97308	0.0342409	0.668635	0.932155	0.932801	2.97308	0.0127768	0.175615	-0.157737	-0.157827	2.97308	0.654363	1	1.36771	1.3685	2.97308	0.000473956	0.0475535	-0.51649	-0.516704	2.97308	0.143221	0.514645	-0.820383	-0.820764	2.97308	0.0240177	0.164127	0.303893	0.30406	2.97308	0.388447	0.96326	0.851221	0.851795
102637719	Gm38500	predicted gene, 38500	-1.5781	-1.58069	2.48439	0.00326692	0.031401	0.105124	0.105218	2.48439	0.822679	1	-1.68322	-1.68591	2.48439	0.00199192	0.147593	1.59049	1.5913	2.48439	0.00187983	0.0536986	1.22946	1.23171	2.48439	0.0186289	0.241662	0.746076	0.746944	2.48439	0.124903	0.793101	1.69561	1.69652	2.48439	0.00102763	0.0167067	-0.34864	-0.348981	2.48439	0.460999	0.853453	2.04425	2.0455	2.48439	0.000172099	0.0115563	2.44169	2.44346
102637825	Gm34538	predicted gene, 34538	-1.89955	-1.90586	0.372261	0.017538	0.110048	-2.27716	-2.28604	0.372261	0.00568541	0.0422235	0.377615	0.380187	0.372261	0.623012	1	1.18056	1.18684	0.372261	0.123883	0.572057	0.54134	0.544076	0.372261	0.47359	1	1.37399	1.37768	0.372261	0.0688559	0.644913	-1.0966	-1.0992	0.372261	0.137648	0.503495	-1.35821	-1.36178	0.372261	0.0720817	0.329159	0.261609	0.262576	0.372261	0.719881	1	0.277392	0.278473
102637959	Gm38504	predicted gene, 38504	-0.917796	-0.920397	0.628486	0.0875612	0.320831	-1.68058	-1.68704	0.628486	0.00399207	0.0319812	0.762785	0.766638	0.628486	0.16711	1	1.60483	1.61113	0.628486	0.00562202	0.106266	0.434186	0.43563	0.628486	0.410712	0.9868	1.08632	1.08956	0.628486	0.0454266	0.536001	-0.0757558	-0.075909	0.628486	0.882449	1	-0.48361	-0.484768	0.628486	0.35159	0.761838	0.407855	0.408859	0.628486	0.431216	0.99077	1.01056	1.01365
102638008	Gm38505	predicted gene, 38505	-2.03671	-2.04349	0.349331	0.00735128	0.0583846	-1.12927	-1.13186	0.349331	0.106212	0.331243	-0.907437	-0.911631	0.349331	0.203292	1	-0.542552	-0.544719	0.349331	0.435086	0.939285	-0.311094	-0.313161	0.349331	0.664111	1	2.16086	2.16852	0.349331	0.00492846	0.190623	-1.67182	-1.67658	0.349331	0.0218842	0.157155	-2.3478	-2.35665	0.349331	0.00275966	0.0354141	0.675978	0.680073	0.349331	0.343369	0.930706	0.489042	0.491946
102638127	Gm34764	predicted gene, 34764	-0.713465	-0.714325	1.76721	0.0489826	0.22138	-0.972101	-0.973395	1.76721	0.00894879	0.0592268	0.258636	0.25907	1.76721	0.469986	1	-0.0234298	-0.0234724	1.76721	0.947825	1	-0.142102	-0.142342	1.76721	0.689362	1	-0.071586	-0.0716528	1.76721	0.835645	1	-0.99553	-0.996867	1.76721	0.00759236	0.0741934	-0.855567	-0.856666	1.76721	0.0196395	0.143099	-0.139963	-0.140201	1.76721	0.695262	1	-1.06712	-1.06852
102638249	Gm34858	predicted gene, 34858	-1.34805	-1.36029	-0.817496	0.124468	0.401069	-2.6953	-2.73879	-0.817496	0.00704575	0.0496566	1.34725	1.37849	-0.817496	0.153755	1	2.49406	2.53636	-0.817496	0.0117156	0.165378	0.500787	0.506826	-0.817496	0.561069	1	0.594754	0.598736	-0.817496	0.478746	1	-0.201242	-0.202428	-0.817496	0.808115	1	-0.847262	-0.853469	-0.817496	0.317622	0.729565	0.64602	0.65104	-0.817496	0.445488	0.999339	0.393512	0.396308
102638343	Gm34931	predicted gene, 34931	-0.892852	-0.918493	-1.8553	0.530065	0.868054	1.34592	1.36382	-1.8553	0.325826	0.652918	-2.23877	-2.28232	-1.8553	0.127364	0.989373	-0.556101	-0.561572	-1.8553	0.677549	1	-2.15374	-2.35149	-1.8553	0.202656	0.779778	5.61841	13.1071	-1.8553	0.011467	0.289504	0.789819	0.802252	-1.8553	0.561224	0.955448	-3.04659	-3.26998	-1.8553	0.0706458	0.326086	3.83641	4.07223	-1.8553	0.0268519	0.302088	6.40823	13.9094
102638347	Gm34934	predicted gene, 34934	-0.61172	-0.615321	-0.563884	0.497482	0.844353	-2.20653	-2.23154	-0.563884	0.0294577	0.13963	1.59481	1.61622	-0.563884	0.106876	0.956284	-0.621195	-0.638293	-0.563884	0.542517	0.999664	-0.72251	-0.729371	-0.563884	0.435787	1	-0.55575	-0.55793	-0.563884	0.531249	1	-2.82773	-2.86983	-0.563884	0.00832376	0.0799668	-1.33423	-1.34469	-0.563884	0.154632	0.509617	-1.4935	-1.52514	-0.563884	0.140441	0.673275	-3.38348	-3.42776
102638432	Gm35002	predicted gene, 35002	-1.22077	-1.22229	1.49936	0.0364034	0.182008	-2.02472	-2.02824	1.49936	0.00159012	0.016033	0.803946	0.805948	1.49936	0.173223	1	1.13821	1.14077	1.49936	0.0565429	0.392533	-0.104623	-0.104831	1.49936	0.853572	1	1.63897	1.64139	1.49936	0.00714643	0.233849	-0.886503	-0.887469	1.49936	0.116691	0.460173	-1.32539	-1.32712	1.49936	0.0244438	0.166041	0.438891	0.43965	1.49936	0.437273	0.995331	0.752467	0.753917
102638463	Gm35021	predicted gene, 35021	0.910457	0.911615	2.41882	0.0116863	0.0817953	1.54784	1.54947	2.41882	7.53025e-05	0.00141661	-0.637381	-0.637852	2.41882	0.0651283	0.814635	-0.0915522	-0.0916072	2.41882	0.783191	1	0.184164	0.18432	2.41882	0.586305	1	-0.813112	-0.814175	2.41882	0.0233705	0.398349	1.45629	1.45786	2.41882	0.00015973	0.00376053	1.09462	1.09593	2.41882	0.00294234	0.0371665	0.361665	0.361925	2.41882	0.28493	0.880896	0.643174	0.643684
102638751	Gm35240	predicted gene, 35240	-1.37296	-1.37622	1.3313	0.00487594	0.0427646	-0.430845	-0.431577	1.3313	0.333298	0.660476	-0.942113	-0.944638	1.3313	0.0464558	0.748755	0.164092	0.164408	1.3313	0.712172	1	1.21925	1.22227	1.3313	0.0114074	0.180826	0.160635	0.160878	1.3313	0.71473	1	-0.266754	-0.267169	1.3313	0.545169	0.947092	-0.153708	-0.153941	1.3313	0.726818	1	-0.113045	-0.113228	1.3313	0.798119	1	-0.106119	-0.10629
102638769	Gm26808	predicted gene, 26808	-1.2044	-1.20578	2.09616	0.00147063	0.0169088	-1.04269	-1.04381	2.09616	0.00483276	0.0372948	-0.16171	-0.161972	2.09616	0.649104	1	0.29536	0.295759	2.09616	0.401355	0.910475	0.416201	0.416801	2.09616	0.242963	0.835458	-0.142232	-0.142331	2.09616	0.67526	1	-0.747334	-0.748048	2.09616	0.0361692	0.2226	-0.788203	-0.788978	2.09616	0.0279194	0.180753	0.0408699	0.0409293	2.09616	0.906214	1	-0.889565	-0.890379
102638770	Gm35254	predicted gene, 35254	-1.25176	-1.26059	-0.300079	0.102711	0.354829	-2.4278	-2.45617	-0.300079	0.00516487	0.0393397	1.17604	1.19558	-0.300079	0.151913	1	2.66982	2.69917	-0.300079	0.00256403	0.0650626	1.37987	1.38922	-0.300079	0.0749175	0.513042	0.929006	0.934763	-0.300079	0.21362	0.943195	0.242021	0.243	-0.300079	0.736712	1	0.128114	0.128634	-0.300079	0.859043	1	0.113907	0.114366	-0.300079	0.874461	1	1.17103	1.17776
102638848	Gm38512	predicted gene, 38512	-7.11914	-1.44269e+08	-1.68895	0.00484178	0.0424842	-1.95146	-1.98044	-1.68895	0.201553	0.497998	-5.16769	-1.44269e+08	-1.68895	0.0349224	0.671515	1.12942	1.14997	-1.68895	0.452286	0.947542	5.37781	1.44269e+08	-1.68895	0.0286114	0.304521	1.50398	1.52361	-1.68895	0.318058	1	-0.822036	-0.830469	-1.68895	0.571048	0.959672	-1.74134	-1.76567	-1.68895	0.249604	0.653193	0.9193	0.935205	-1.68895	0.537882	1	0.681947	0.693144
102638959	Gm35394	predicted gene, 35394	0.461334	0.462115	1.7885	0.192349	0.516787	0.192436	0.192793	1.7885	0.584127	0.879481	0.268897	0.269322	1.7885	0.444598	1	0.870343	0.871471	1.7885	0.0168811	0.208603	0.689981	0.690762	1.7885	0.0532079	0.436567	-0.366825	-0.367466	1.7885	0.29694	1	1.06278	1.06426	1.7885	0.00408242	0.046799	1.15131	1.15288	1.7885	0.00207033	0.0289502	-0.0885349	-0.0886133	1.7885	0.795192	1	0.695954	0.696798
102639020	Gm12781	predicted gene 12781	-0.705649	-0.70715	0.903392	0.0998768	0.348272	-0.40801	-0.408788	0.903392	0.332622	0.659888	-0.297639	-0.298362	0.903392	0.484014	1	-1.17827	-1.18227	0.903392	0.00975536	0.149509	-0.0563716	-0.0565314	0.903392	0.894618	1	0.394615	0.395365	0.903392	0.34781	1	-1.58628	-1.59106	0.903392	0.000836229	0.01438	-0.762021	-0.763681	0.903392	0.0763691	0.341007	-0.824258	-0.827377	0.903392	0.0632871	0.467269	-1.19166	-1.19569
102639022	Gm35439	predicted gene, 35439	-1.55426	-1.55695	1.387	0.000415905	0.00628373	-1.50716	-1.50972	1.387	0.00057416	0.0072811	-0.0471033	-0.0472299	1.387	0.907422	1	0.917909	0.919774	1.387	0.0255065	0.262053	0.440213	0.441295	1.387	0.274669	0.872795	1.0061	1.00751	1.387	0.013514	0.311498	-0.589248	-0.589951	1.387	0.132457	0.493316	-1.11405	-1.11566	1.387	0.00688547	0.0681134	0.524799	0.525709	1.387	0.185385	0.758924	0.416847	0.417558
102639044	LOC102639044	nucleophosmin pseudogene	4.69515	10.363	-2.26928	0.018995	0.116469	6.05183	11.7533	-2.26928	0.00341326	0.0284155	-1.35667	-1.39028	-2.26928	0.31966	1	0.239299	0.24261	-2.26928	0.851505	1	-4.69901	-10.5821	-2.26928	0.0249539	0.282377	-4.37719	-10.0289	-2.26928	0.028282	0.433662	6.29113	11.9959	-2.26928	0.00247269	0.0322065	-0.00386115	-0.219088	-2.26928	0.993594	1	6.29499	12.215	-2.26928	0.00341036	0.0909695	1.91393	1.96695
102639119	Gm35507	predicted gene, 35507	-0.922219	-0.927869	-0.66117	0.248272	0.596283	-2.59565	-2.62788	-0.66117	0.00529022	0.0400107	1.67343	1.70002	-0.66117	0.0585611	0.79897	2.5023	2.53411	-0.66117	0.00683394	0.119064	-0.620741	-0.627177	-0.66117	0.442358	1	1.62726	1.64046	-0.66117	0.0522774	0.565117	-0.0933526	-0.0937774	-0.66117	0.903769	1	-1.54296	-1.55505	-0.66117	0.0630551	0.303787	1.44961	1.46127	-0.66117	0.0794804	0.524081	1.5339	1.54668
102639129	Gm35515	predicted gene, 35515	1.27139	1.2758	1.08323	0.0244608	0.138358	1.2211	1.22541	1.08323	0.0299273	0.141162	0.0502887	0.0503961	1.08323	0.92378	1	0.619605	0.62073	1.08323	0.240694	0.756505	0.439306	0.44012	1.08323	0.402921	0.980891	-1.10231	-1.10633	1.08323	0.0482283	0.552396	1.84071	1.84614	1.08323	0.00190822	0.026549	1.7107	1.71592	1.08323	0.00345538	0.0417647	0.130011	0.130214	1.08323	0.801611	1	0.738404	0.739808
102639199	Gm35562	predicted gene, 35562	-1.83474	-1.83612	2.43593	4.2075e-05	0.00096523	-1.9251	-1.9266	2.43593	2.33595e-05	0.000522858	0.0903586	0.0904838	2.43593	0.818975	1	0.725242	0.726049	2.43593	0.0674359	0.43041	0.337727	0.338121	2.43593	0.389529	0.973827	1.51276	1.51376	2.43593	0.000356563	0.0398588	-1.19986	-1.20056	2.43593	0.0029201	0.0365041	-1.49701	-1.498	2.43593	0.000396923	0.00801263	0.297156	0.297445	2.43593	0.441334	0.996493	0.312901	0.313201
102639258	Gm35611	predicted gene, 35611	0.38357	0.384113	1.9994	0.402634	0.768256	1.82489	1.82656	1.9994	0.000376889	0.00518029	-1.44132	-1.44245	1.9994	0.0031565	0.196915	-0.999856	-1.00051	1.9994	0.0313515	0.291634	-0.485873	-0.486579	1.9994	0.293623	0.890864	0.970839	0.973138	1.9994	0.046371	0.540172	0.825034	0.82605	1.9994	0.0763484	0.360562	-0.102303	-0.102466	1.9994	0.82387	1	0.927337	0.928516	1.9994	0.0492946	0.415885	1.79587	1.79919
102639545	Gm35835	predicted gene, 35835	-1.2138	-1.21452	2.60595	0.00207715	0.022011	-1.57534	-1.57641	2.60595	0.000167589	0.00269634	0.361535	0.361895	2.60595	0.33829	1	0.353953	0.354306	2.60595	0.345698	0.870822	-0.023834	-0.0238564	2.60595	0.948737	1	0.997632	0.998165	2.60595	0.00934901	0.264328	-1.22139	-1.2221	2.60595	0.00188115	0.0262746	-1.23764	-1.23837	2.60595	0.001794	0.0258141	0.0162528	0.0162674	2.60595	0.964814	1	-0.223754	-0.223939
102639700	LOC102639700	zinc finger protein 120-like	-0.318675	-0.319089	1.72699	0.504076	0.849643	-0.30727	-0.307651	1.72699	0.521035	0.831927	-0.0114049	-0.0114375	1.72699	0.981005	1	0.456087	0.456628	1.72699	0.341247	0.867644	0.229731	0.230035	1.72699	0.629991	1	1.43735	1.44029	1.72699	0.00649047	0.218675	0.148817	0.148976	1.72699	0.752417	1	-0.0889434	-0.0890541	1.72699	0.851096	1	0.237761	0.238031	1.72699	0.615258	1	1.58617	1.58927
102639716	Gm35963	predicted gene, 35963	1.46117	1.51739	-1.69279	0.348221	0.715192	0.282689	0.299788	-1.69279	0.858589	1	1.17849	1.2176	-1.69279	0.448895	1	3.15923	3.22131	-1.69279	0.0536693	0.382993	0.313704	0.31979	-1.69279	0.829581	1	4.11098	1.44269e+08	-1.69279	0.0779526	0.678735	3.44192	3.5211	-1.69279	0.0378402	0.229258	1.77488	1.83718	-1.69279	0.254604	0.659495	1.66704	1.68392	-1.69279	0.25377	0.849865	7.55291	1.44269e+08
102639765	Gm29260	predicted gene 29260	-0.879833	-0.879898	5.79062	7.04818e-08	4.7659e-06	-1.18581	-1.18591	5.79062	1.53203e-10	2.26167e-08	0.305975	0.306009	5.79062	0.13768	1	0.0878653	0.0878757	5.79062	0.84206	1	0.164693	0.164708	5.79062	0.611243	1	0.00770107	0.00770148	5.79062	0.989443	1	-1.09794	-1.09803	5.79062	7.82159e-10	1.36272e-07	-0.71514	-0.71519	5.79062	4.61996e-06	0.000228505	-0.382802	-0.382841	5.79062	0.0332865	0.339131	-1.09024	-1.09033
102639814	A730032A03Rik	RIKEN cDNA A730032A03 gene	-0.434669	-0.436472	0.508963	0.424295	0.788377	0.984388	0.986896	0.508963	0.0721517	0.256355	-1.41906	-1.42337	0.508963	0.013589	0.464308	-0.174328	-0.174658	0.508963	0.740579	1	0.00124855	0.00130145	0.508963	0.99809	1	1.72979	1.74153	0.508963	0.00482892	0.18866	0.81006	0.812239	0.508963	0.134768	0.498103	-0.433421	-0.435171	0.508963	0.423662	0.826095	1.24348	1.24741	0.508963	0.0275576	0.306938	2.53985	2.55377
102639848	Gm12532	predicted gene 12532	-1.65656	-1.66208	0.783422	0.0035211	0.0331884	-1.23996	-1.24338	0.783422	0.0220978	0.113597	-0.416607	-0.418706	0.783422	0.435287	1	0.226782	0.227631	0.783422	0.663619	1	0.949353	0.953288	0.783422	0.0775021	0.522324	-0.180264	-0.18057	0.783422	0.718654	1	-1.01317	-1.01575	0.783422	0.0539681	0.288631	-0.707209	-0.708797	0.783422	0.16778	0.53323	-0.305964	-0.306951	0.783422	0.55051	1	-1.19344	-1.19632
102639925	Gm36123	predicted gene, 36123	-2.48693	-2.49563	0.836567	0.000454305	0.00674793	-2.10874	-2.11493	0.836567	0.00178151	0.0174886	-0.378187	-0.380696	0.836567	0.550176	1	1.8198	1.82557	0.836567	0.00565021	0.106397	1.53794	1.54489	0.836567	0.0187042	0.242278	2.14695	2.1534	0.836567	0.00149738	0.0955705	-0.288945	-0.28936	0.836567	0.61554	0.979045	-0.94899	-0.950741	0.836567	0.111656	0.423312	0.660045	0.66138	0.836567	0.263022	0.860238	1.858	1.86403
102640044	Gm26550	predicted gene, 26550	-2.07582	-2.09087	-0.312131	0.00314493	0.0304709	-0.379136	-0.380538	-0.312131	0.533242	0.841977	-1.69668	-1.71034	-0.312131	0.0129556	0.450625	-0.403549	-0.40551	-0.312131	0.512388	0.985955	0.698197	0.705799	-0.312131	0.28191	0.879758	2.03236	2.04688	-0.312131	0.00355828	0.160421	-0.782685	-0.786048	-0.312131	0.206938	0.622875	-1.37762	-1.38508	-0.312131	0.0337882	0.204599	0.594937	0.599027	-0.312131	0.343087	0.93033	1.24968	1.26083
102640142	Gm36279	predicted gene, 36279	-1.06751	-1.06943	1.31491	0.0586444	0.248602	-1.56664	-1.57007	1.31491	0.00877044	0.0583058	0.499123	0.500637	1.31491	0.37885	1	0.125332	0.125791	1.31491	0.825743	1	0.464915	0.465895	1.31491	0.404193	0.981011	-0.242822	-0.243094	1.31491	0.650351	1	-1.4413	-1.44428	1.31491	0.0142396	0.116292	-0.602598	-0.603538	1.31491	0.273373	0.681651	-0.838706	-0.840741	1.31491	0.142946	0.678183	-1.68413	-1.68737
102640173	Gm28175	predicted gene 28175	-0.499079	-0.499297	3.08121	0.0687983	0.274902	-1.04419	-1.04475	3.08121	0.000451587	0.00601463	0.54511	0.545453	3.08121	0.0514137	0.771029	0.220904	0.22106	3.08121	0.429368	0.934759	-0.216118	-0.216238	3.08121	0.435865	1	0.299379	0.299502	3.08121	0.273776	1	-0.823285	-0.82369	3.08121	0.00371742	0.0439165	-0.715197	-0.715534	3.08121	0.0104493	0.0916046	-0.108088	-0.108155	3.08121	0.69785	1	-0.523905	-0.524188
102640253	Gm36365	predicted gene, 36365	0.74792	0.749539	0.768336	0.157063	0.460498	0.386979	0.387925	0.768336	0.458638	0.7805	0.36094	0.361613	0.768336	0.487395	1	-0.861295	-0.863794	0.768336	0.110484	0.53956	-2.15611	-2.16438	0.768336	0.000504847	0.0220923	-0.236867	-0.237474	0.768336	0.649803	1	-0.474316	-0.475868	0.768336	0.371443	0.818545	-1.40819	-1.41484	0.768336	0.0143833	0.115803	0.93387	0.938975	0.768336	0.0962117	0.572044	-0.711183	-0.713343
102640298	Gm36401	predicted gene, 36401	-0.359181	-0.36059	0.130674	0.609618	0.919736	-0.393539	-0.394964	0.130674	0.576936	0.87449	0.0343578	0.0343744	0.130674	0.961508	1	0.104199	0.10452	0.130674	0.882603	1	0.527055	0.529008	0.130674	0.455273	1	2.42321	2.44482	0.130674	0.00393618	0.166728	-0.28934	-0.290444	0.130674	0.678541	1	0.167873	0.168418	0.130674	0.809035	1	-0.457213	-0.458862	0.130674	0.513765	1	2.13387	2.15438
102640300	Gm16083	predicted gene 16083	0.114758	0.11563	-0.586597	0.905637	1	-0.141957	-0.142953	-0.586597	0.883995	1	0.256715	0.258583	-0.586597	0.79261	1	1.0384	1.04418	-0.586597	0.291061	0.816193	-1.13273	-1.14411	-0.586597	0.263939	0.860008	2.4821	2.53107	-0.586597	0.0309777	0.450974	0.896445	0.901224	-0.586597	0.356438	0.805086	-1.01797	-1.02848	-0.586597	0.312088	0.724633	1.91442	1.92971	-0.586597	0.0662418	0.477145	3.37854	3.4323
102640405	Gm36470	predicted gene, 36470	-1.2982	-1.3025	0.245299	0.0355718	0.179287	-3.06367	-3.08563	0.245299	7.37052e-05	0.00139062	1.76547	1.78313	0.245299	0.0105683	0.406324	1.14909	1.16279	0.245299	0.0885219	0.487349	0.344245	0.345776	0.245299	0.563329	1	0.429121	0.430138	0.245299	0.460962	1	-1.91458	-1.92284	0.245299	0.0039603	0.0457517	-0.953951	-0.956723	0.245299	0.11145	0.422914	-0.960626	-0.966117	0.245299	0.123258	0.633453	-1.48546	-1.4927
102640515	Gm36556	predicted gene, 36556	-0.0409094	-0.0409408	2.39346	0.894772	1	-0.513856	-0.514319	2.39346	0.104385	0.327711	0.472947	0.473378	2.39346	0.135703	1	0.557813	0.558307	2.39346	0.0794033	0.4666	0.0855167	0.0855814	2.39346	0.782685	1	0.887917	0.888844	2.39346	0.00753948	0.241401	0.0439567	0.0439886	2.39346	0.88666	1	0.0446073	0.0446406	2.39346	0.885094	1	-0.00065056	-0.000652026	2.39346	0.99832	1	0.931874	0.932833
102640547	Gm36584	predicted gene, 36584	-2.22309	-2.25339	-1.1157	0.0534146	0.2337	-0.176719	-0.177801	-1.1157	0.862945	1	-2.04637	-2.07559	-1.1157	0.0735105	0.8561	-2.24214	-2.27888	-1.1157	0.0544096	0.384457	-1.78769	-1.88292	-1.1157	0.166097	0.717478	0.571918	0.575959	-1.1157	0.580807	1	-2.41886	-2.45668	-1.1157	0.03933	0.235554	-4.01078	-4.13631	-1.1157	0.00365095	0.0435096	1.59192	1.67964	-1.1157	0.219909	0.807283	-1.84694	-1.88072
102640612	Gm36635	predicted gene, 36635	-1.87546	-1.88424	0.00274654	0.0121313	0.0842095	-2.22475	-2.23682	0.00274654	0.00416286	0.0330754	0.349299	0.352583	0.00274654	0.626831	1	1.10347	1.11169	0.00274654	0.127851	0.580016	0.674308	0.678931	0.00274654	0.337372	0.933025	1.2071	1.21139	0.00274654	0.0850779	0.695267	-1.12128	-1.12513	0.00274654	0.107728	0.441679	-1.20115	-1.20531	0.00274654	0.0854918	0.363391	0.0798674	0.0801792	0.00274654	0.906979	1	0.0858187	0.0862616
102640646	Gm36661	predicted gene, 36661	-2.93837	-2.98285	-1.61152	0.0263265	0.14584	-3.56009	-3.63339	-1.61152	0.0113229	0.0703871	0.621716	0.650537	-1.61152	0.636509	1	1.3013	1.34952	-1.61152	0.314883	0.845266	-3.02246	-3.43462	-1.61152	0.0623372	0.473961	3.34453	3.40786	-1.61152	0.0149057	0.325986	-2.25879	-2.28387	-1.61152	0.0687721	0.337078	-5.96083	-6.41747	-1.61152	0.000768772	0.0133819	3.70204	4.1336	-1.61152	0.0225945	0.275303	1.08574	1.12399
102640779	2900052L18Rik	RIKEN cDNA 2900052L18 gene	-0.974047	-0.975156	1.66635	0.00566254	0.04782	-1.40896	-1.41087	1.66635	0.000183191	0.00290388	0.434916	0.435709	1.66635	0.203992	1	-0.0253924	-0.0254491	1.66635	0.940513	1	0.116384	0.116556	1.66635	0.727636	1	0.865696	0.86664	1.66635	0.0126162	0.302839	-1.43436	-1.43631	1.66635	0.000146492	0.00351928	-0.857663	-0.8586	1.66635	0.0134193	0.110105	-0.576693	-0.577714	1.66635	0.0943367	0.567281	-0.568659	-0.569675
102640951	Gm15614	predicted gene 15614	-0.76626	-0.767572	1.08838	0.112439	0.375813	-2.24508	-2.25206	1.08838	0.000113517	0.00197065	1.47882	1.48449	1.08838	0.00591782	0.287263	1.64207	1.64808	1.08838	0.00252961	0.0648161	-0.41114	-0.412183	1.08838	0.395438	0.97705	0.505986	0.506772	1.08838	0.285934	1	-0.603012	-0.60398	1.08838	0.204786	0.61958	-1.1774	-1.17975	1.08838	0.0186921	0.13866	0.574388	0.575774	1.08838	0.235043	0.828111	-0.0970263	-0.0972082
102640966	Gm36904	predicted gene, 36904	-1.03073	-1.03431	0.0329272	0.109157	0.368667	-2.15728	-2.16958	0.0329272	0.00274041	0.0241004	1.12655	1.13527	0.0329272	0.095394	0.929126	0.851613	0.858829	0.0329272	0.199319	0.701736	-0.24673	-0.248115	0.0329272	0.701061	1	0.664436	0.666439	0.0329272	0.287602	1	-1.30567	-1.31075	0.0329272	0.0454629	0.258929	-1.27746	-1.28243	0.0329272	0.0523463	0.270386	-0.0282063	-0.0283257	0.0329272	0.964888	1	-0.641232	-0.644312
102640972	Gm36908	predicted gene, 36908	-1.34362	-1.346	1.59528	0.00163115	0.0182551	-1.03822	-1.03986	1.59528	0.0108048	0.0679525	-0.305398	-0.306141	1.59528	0.447473	1	0.966924	0.96848	1.59528	0.0175264	0.212637	0.656076	0.657524	1.59528	0.104902	0.595179	0.164156	0.164345	1.59528	0.668526	1	-0.0713001	-0.0713814	1.59528	0.851989	1	-0.687547	-0.688479	1.59528	0.080403	0.350047	0.616247	0.617097	1.59528	0.118059	0.621378	0.0928562	0.0929632
102641860	Gm26578	predicted gene, 26578	-1.00979	-1.01102	1.68933	0.0111905	0.0793593	-1.25721	-1.25889	1.68933	0.00225534	0.020839	0.247416	0.247875	1.68933	0.5258	1	0.107966	0.108177	1.68933	0.780814	1	-0.0547837	-0.0548804	1.68933	0.88703	1	0.395865	0.396246	1.68933	0.295706	1	-1.14924	-1.15071	1.68933	0.00442447	0.0497831	-1.06458	-1.0659	1.68933	0.00782117	0.0745826	-0.0846662	-0.084818	1.68933	0.826064	1	-0.753377	-0.754468
102641931	Gm38585	predicted gene, 38585	-2.8859	-2.92031	-0.589937	0.0025	0.0253618	-1.56789	-1.57841	-0.589937	0.0606301	0.227896	-1.31801	-1.3419	-0.589937	0.133793	0.99996	0.192067	0.194067	-0.589937	0.812618	1	2.23052	2.26185	-0.589937	0.0145738	0.208343	1.19168	1.19857	-0.589937	0.141044	0.828089	-1.37582	-1.38435	-0.589937	0.093819	0.408733	-0.655381	-0.658459	-0.589937	0.404297	0.809519	-0.720443	-0.725888	-0.589937	0.370134	0.951706	-0.184141	-0.185779
102642321	Gm38604	predicted gene, 38604	-0.728924	-0.729194	3.5637	0.000829289	0.0110149	-0.590225	-0.59043	3.5637	0.00642043	0.046261	-0.138699	-0.138764	3.5637	0.581621	1	-0.00036232	-0.000362168	3.5637	0.998921	1	-0.578402	-0.578729	3.5637	0.00876617	0.15342	-0.408681	-0.408781	3.5637	0.0659427	0.634461	-0.590587	-0.590792	3.5637	0.00621067	0.0639894	-1.30733	-1.30792	3.5637	1.81081e-07	1.40077e-05	0.716739	0.717131	3.5637	0.00108817	0.0420027	-0.999268	-0.999573
102644	Oaf	out at first homolog	0.444316	0.444409	4.09418	0.0416541	0.199888	-0.0212036	-0.0212088	4.09418	0.935627	1	0.46552	0.465617	4.09418	0.0323844	0.660635	-0.903182	-0.90349	4.09418	5.51546e-05	0.00444431	-0.922389	-0.92262	4.09418	3.31643e-05	0.00291529	-0.0264595	-0.0264656	4.09418	0.919787	1	-0.924386	-0.924699	4.09418	3.76876e-05	0.00118126	-0.478073	-0.478211	4.09418	0.0281596	0.181148	-0.446313	-0.446488	4.09418	0.0448984	0.396661	-0.950845	-0.951165
102791	Tcta	T cell leukemia translocation altered gene	-0.364546	-0.364575	5.71728	0.0615892	0.256543	-0.357728	-0.357757	5.71728	0.0688484	0.248731	-0.0068178	-0.00681839	5.71728	0.986131	1	-0.147583	-0.147597	5.71728	0.624798	1	-0.16579	-0.165805	5.71728	0.56464	1	-0.0459429	-0.0459461	5.71728	0.906077	1	-0.505312	-0.505354	5.71728	0.00383885	0.0447131	-0.530336	-0.53038	5.71728	0.00215955	0.029725	0.0250241	0.0250264	5.71728	0.948464	1	-0.551255	-0.5513
102866	Pls3	plastin 3 (T-isoform)	-0.343617	-0.343646	5.70187	0.0836308	0.311625	-0.472911	-0.472953	5.70187	0.00702456	0.0495615	0.129294	0.129307	5.70187	0.690261	1	0.110369	0.11038	5.70187	0.747513	1	-0.00135759	-0.00135784	5.70187	0.997378	1	-0.274722	-0.27474	5.70187	0.218797	0.949317	-0.362542	-0.362573	5.70187	0.0609984	0.312118	-0.344975	-0.345004	5.70187	0.081737	0.353738	-0.0175669	-0.0175685	5.70187	0.965985	1	-0.637264	-0.637313
102920	Cenpi	centromere protein I	0.681549	0.68172	4.183	0.00376676	0.0351401	0.451605	0.451727	4.183	0.0574265	0.218918	0.229944	0.229993	4.183	0.354149	1	0.0313747	0.0313811	4.183	0.902811	1	0.147192	0.14722	4.183	0.560172	1	0.240108	0.240191	4.183	0.333648	1	0.482979	0.483108	4.183	0.0409891	0.241968	0.828741	0.82894	4.183	0.000538904	0.0102577	-0.345762	-0.345832	4.183	0.15152	0.695146	0.723088	0.723299
102954	Nudt10	nudix (nucleoside diphosphate linked moiety X)-type motif 10	-0.00327474	-0.00327611	4.55333	0.98989	1	-0.415985	-0.416076	4.55333	0.0927893	0.302912	0.41271	0.4128	4.55333	0.0970693	0.935338	0.960993	0.961169	4.55333	0.000199317	0.0111821	-0.190461	-0.190499	4.55333	0.45612	1	0.00778874	0.00779025	4.55333	0.976012	1	0.545008	0.545093	4.55333	0.0250765	0.173325	-0.193735	-0.193775	4.55333	0.446892	0.842179	0.738743	0.738868	4.55333	0.00274035	0.0787453	0.552797	0.552883
103012	Firre	functional intergenic repeating RNA element	-1.07011	-1.07032	4.41378	1.46848e-07	9.01552e-06	-0.995636	-0.995821	4.41378	4.75274e-07	1.91088e-05	-0.0744789	-0.0744984	4.41378	0.801356	1	0.0162114	0.0162156	4.41378	0.958096	1	0.487971	0.488083	4.41378	0.0110074	0.175782	0.732128	0.732251	4.41378	7.24332e-05	0.0130914	-0.979424	-0.979606	4.41378	6.0594e-07	3.5296e-05	-0.582144	-0.582237	4.41378	0.00162358	0.0239751	-0.39728	-0.397369	4.41378	0.0485076	0.412347	-0.247297	-0.247355
103098	Slc6a15	solute carrier family 6 (neurotransmitter transporter), member 15	0.203654	0.203686	4.89792	0.469725	0.825635	-0.0510647	-0.0510736	4.89792	0.925502	1	0.254718	0.25476	4.89792	0.277402	1	0.210298	0.210332	4.89792	0.442259	0.943662	0.368721	0.368769	4.89792	0.0412382	0.377138	-0.243012	-0.24305	4.89792	0.318769	1	0.159233	0.159259	4.89792	0.642558	0.990636	0.572374	0.572455	4.89792	0.000206391	0.00473927	-0.413141	-0.413196	4.89792	0.0151105	0.215115	-0.0837789	-0.0837913
103172	Chchd10	coiled-coil-helix-coiled-coil-helix domain containing 10	0.0977166	0.0977277	5.29532	0.796007	1	0.489363	0.489412	5.29532	0.00393093	0.0316751	-0.391647	-0.391684	5.29532	0.0335465	0.666759	-0.23195	-0.231971	5.29532	0.348968	0.872339	-0.0964542	-0.0964651	5.29532	0.79815	1	0.679848	0.67995	5.29532	3.76158e-05	0.00855825	0.257413	0.257441	5.29532	0.267207	0.708752	0.00126243	0.00126259	5.29532	0.997776	1	0.256151	0.256178	5.29532	0.270969	0.868941	0.937261	0.93739
103236	Csnk1g2	casein kinase 1, gamma 2	0.506056	0.506079	6.7838	0.000482007	0.00707785	0.637348	0.637376	6.7838	6.06999e-06	0.000168177	-0.131292	-0.131297	6.7838	0.795563	1	-0.102676	-0.102679	6.7838	0.871302	1	0.116155	0.11616	6.7838	0.838792	1	-0.305494	-0.305509	6.7838	0.120792	0.784954	0.534672	0.534697	6.7838	0.000186987	0.00428962	0.622211	0.622239	6.7838	9.94096e-06	0.000430085	-0.087539	-0.0875422	6.7838	0.902177	1	0.229179	0.229188
103266	Tmem263	transmembrane protein 263	-0.0205974	-0.0205989	6.18102	0.950907	1	-0.090834	-0.0908404	6.18102	0.770007	0.980685	0.0702366	0.0702416	6.18102	0.825336	1	0.647645	0.647683	6.18102	0.000306072	0.0150232	0.241736	0.241751	6.18102	0.309212	0.908101	-0.175309	-0.17532	6.18102	0.512945	1	0.556811	0.556843	6.18102	0.00208585	0.0281692	0.221138	0.221152	6.18102	0.369344	0.77867	0.335673	0.33569	6.18102	0.106917	0.595869	0.381502	0.381523
103466	Nt5dc3	5'-nucleotidase domain containing 3	0.818551	0.819333	2.38225	0.0113236	0.0801139	0.954323	0.955195	2.38225	0.00361633	0.0297601	-0.135772	-0.135862	2.38225	0.655843	1	-0.161581	-0.16169	2.38225	0.595577	1	-0.37016	-0.370458	2.38225	0.228552	0.816105	0.188709	0.188971	2.38225	0.548144	1	0.792742	0.793505	2.38225	0.0136888	0.113228	0.448391	0.448876	2.38225	0.149769	0.499981	0.34435	0.344629	2.38225	0.261725	0.858442	0.981451	0.982476
103534	Mgat4b	mannoside acetylglucosaminyltransferase 4, isoenzyme B	0.552123	0.552142	7.12777	3.7185e-05	0.000871662	0.636158	0.63618	7.12777	1.71274e-06	5.78057e-05	-0.0840353	-0.0840377	7.12777	0.934696	1	-0.193213	-0.193219	7.12777	0.587308	1	-0.112951	-0.112955	7.12777	0.881952	1	-0.26654	-0.26655	7.12777	0.23576	0.966788	0.442945	0.442961	7.12777	0.0019796	0.0271706	0.439172	0.439188	7.12777	0.00224723	0.0306659	0.00377318	0.00377329	7.12777	0.998208	1	0.176405	0.176411
103537	Mbtd1	mbt domain containing 1	-0.546265	-0.546302	6.00306	0.000344151	0.00542424	-0.721216	-0.721268	6.00306	2.03697e-06	6.68809e-05	0.174951	0.174966	6.00306	0.59052	1	0.712469	0.712521	6.00306	2.65718e-06	0.000535284	-0.0055277	-0.00552812	6.00306	0.993322	1	0.167145	0.167155	6.00306	0.626972	1	-0.00874687	-0.00874736	6.00306	0.989931	1	-0.551793	-0.55183	6.00306	0.000287549	0.00617193	0.543046	0.543083	6.00306	0.000375824	0.0199125	0.158398	0.158407
103551	Epop	elongin BC and polycomb repressive complex 2 associated protein	0.689502	0.689606	5.13127	0.000131077	0.0024188	0.769153	0.769266	5.13127	2.27002e-05	0.000509871	-0.079651	-0.0796601	5.13127	0.801378	1	-0.0436077	-0.0436126	5.13127	0.895057	1	0.0764472	0.0764559	5.13127	0.810383	1	-0.471102	-0.471178	5.13127	0.0122854	0.299617	0.725546	0.725654	5.13127	5.90773e-05	0.00169259	0.76595	0.766062	5.13127	2.39252e-05	0.000852098	-0.0404038	-0.0404084	5.13127	0.903188	1	0.254444	0.254476
103554	Psme4	proteasome (prosome, macropain) activator subunit 4	0.108729	0.108738	5.72865	0.789646	1	0.121133	0.121143	5.72865	0.754063	0.974704	-0.012404	-0.012405	5.72865	0.981387	1	0.171743	0.171756	5.72865	0.583301	1	-0.0215047	-0.0215064	5.72865	0.967522	1	0.244817	0.244841	5.72865	0.309716	1	0.292876	0.292899	5.72865	0.16704	0.556282	0.0872239	0.0872313	5.72865	0.844549	1	0.205652	0.205668	5.72865	0.454282	1	0.537693	0.53774
103573	Xpo1	exportin 1	-0.134465	-0.13447	7.05791	0.706245	0.969282	-0.37021	-0.370223	7.05791	0.0457628	0.187281	0.235744	0.235753	7.05791	0.339779	1	0.666022	0.666043	7.05791	2.82832e-05	0.00283404	-0.176855	-0.176861	7.05791	0.557388	1	0.343929	0.343941	7.05791	0.0744425	0.668048	0.295812	0.295821	7.05791	0.161509	0.54797	-0.31132	-0.311331	7.05791	0.128202	0.458281	0.607132	0.607151	7.05791	0.000137742	0.00990257	0.639741	0.639761
103611159	Gm38667	predicted gene, 38667	1.30384	1.30732	1.55678	0.0463446	0.213904	1.54789	1.55173	1.55678	0.0197973	0.105173	-0.244046	-0.244411	1.55678	0.688553	1	0.619795	0.620486	1.55678	0.307657	0.83529	0.538254	0.538986	1.55678	0.37726	0.964802	-0.491799	-0.493483	1.55678	0.441648	1	2.16769	2.17222	1.55678	0.00191031	0.0265589	1.8421	1.84631	1.55678	0.00659471	0.0661489	0.325587	0.325912	1.55678	0.586642	1	1.67589	1.67874
103710	Slc35e4	solute carrier family 35, member E4	0.635034	0.635097	5.48506	0.000110195	0.0021037	0.77105	0.771124	5.48506	3.39591e-06	0.000101978	-0.136016	-0.136026	5.48506	0.683846	1	-0.847798	-0.847881	5.48506	5.942e-07	0.000185342	-0.357292	-0.357324	5.48506	0.0638626	0.478787	-0.139941	-0.139958	5.48506	0.667826	1	-0.0767479	-0.0767576	5.48506	0.84473	1	0.277742	0.277773	5.48506	0.210137	0.60144	-0.35449	-0.354531	5.48506	0.0680796	0.483685	-0.216689	-0.216715
103711	Pnpo	pyridoxine 5'-phosphate oxidase	0.716429	0.716642	3.95632	0.00168216	0.0186699	0.748563	0.748783	3.95632	0.00105952	0.0116819	-0.0321338	-0.0321411	3.95632	0.900504	1	-0.233307	-0.233364	3.95632	0.339562	0.866559	-0.603567	-0.603738	3.95632	0.0079536	0.144291	-0.169388	-0.169449	3.95632	0.497758	1	0.515256	0.515419	3.95632	0.0242171	0.168526	0.112863	0.112904	3.95632	0.656236	0.972196	0.402394	0.402515	3.95632	0.0844466	0.541819	0.345868	0.34597
103724	Tbc1d10a	TBC1 domain family, member 10a	-0.244986	-0.245006	5.88671	0.31539	0.679516	-0.226678	-0.226696	5.88671	0.388059	0.717121	-0.0183081	-0.0183097	5.88671	0.979432	1	0.170015	0.170029	5.88671	0.621089	1	0.560053	0.560094	5.88671	0.000183411	0.0104017	-0.103281	-0.103288	5.88671	0.840913	1	-0.0566634	-0.0566677	5.88671	0.930831	1	0.315067	0.315088	5.88671	0.108144	0.415773	-0.37173	-0.371756	5.88671	0.0336109	0.340063	-0.159944	-0.159956
103733	Tubg1	tubulin, gamma 1	0.473982	0.474003	6.75685	0.00114002	0.0140516	0.540323	0.540347	6.75685	0.000121179	0.00207572	-0.066341	-0.0663435	6.75685	0.941307	1	-0.183944	-0.183951	6.75685	0.604168	1	0.117667	0.117672	6.75685	0.844194	1	-0.0819249	-0.081929	6.75685	0.917798	1	0.356379	0.356395	6.75685	0.0373228	0.226834	0.59165	0.591675	6.75685	2.06496e-05	0.000765024	-0.235271	-0.23528	6.75685	0.366522	0.948224	0.274454	0.274466
103742	Mien1	migration and invasion enhancer 1	0.448639	0.448669	6.10889	0.00656193	0.0533769	0.515887	0.51592	6.10889	0.00109081	0.011952	-0.0672473	-0.067251	6.10889	0.897538	1	-0.268847	-0.268863	6.10889	0.231895	0.745197	-0.213554	-0.213567	6.10889	0.429995	0.996449	-0.0561666	-0.0561708	6.10889	0.916663	1	0.247039	0.247057	6.10889	0.304078	0.751895	0.235086	0.235102	6.10889	0.347392	0.757494	0.0119538	0.0119546	6.10889	0.983894	1	0.190873	0.190886
103743	Tmem98	transmembrane protein 98	-0.297078	-0.297105	5.51245	0.156468	0.459259	-0.498323	-0.498373	5.51245	0.00210117	0.0198701	0.201245	0.201268	5.51245	0.470666	1	0.00525608	0.00525673	5.51245	0.992165	1	0.129698	0.129711	5.51245	0.730412	1	-0.110356	-0.110365	5.51245	0.791312	1	-0.493067	-0.493116	5.51245	0.00240844	0.0316316	-0.16738	-0.167394	5.51245	0.603609	0.946505	-0.325687	-0.325722	5.51245	0.0993339	0.580193	-0.603423	-0.603481
103784	Wdr92	WD repeat domain 92	-0.0968326	-0.0968432	5.54775	0.862521	1	0.363118	0.363152	5.54775	0.0384489	0.167319	-0.459951	-0.459995	5.54775	0.00308287	0.194835	0.13982	0.139831	5.54775	0.745834	1	0.280103	0.280132	5.54775	0.194293	0.768232	0.0743849	0.074393	5.54775	0.907722	1	0.502938	0.502983	5.54775	0.000803787	0.0139038	0.183271	0.183289	5.54775	0.578448	0.931519	0.319667	0.319694	5.54775	0.0966544	0.572671	0.577323	0.577376
103841	Cuedc1	CUE domain containing 1	-0.410769	-0.410811	5.4633	0.0132763	0.089804	-0.336393	-0.336426	5.4633	0.0724435	0.257061	-0.0743764	-0.0743849	5.4633	0.897788	1	0.0735686	0.0735766	5.4633	0.899974	1	0.0773288	0.0773376	5.4633	0.892629	1	-0.136199	-0.13621	5.4633	0.747228	1	-0.262824	-0.262849	5.4633	0.250754	0.687947	-0.33344	-0.333473	5.4633	0.0766713	0.341647	0.0706163	0.0706238	5.4633	0.905728	1	-0.399023	-0.39906
103967	Dnm3	dynamin 3	0.275344	0.275414	3.95647	0.252424	0.601489	0.107777	0.107806	3.95647	0.671145	0.93288	0.167567	0.167608	3.95647	0.502087	1	0.0394327	0.0394427	3.95647	0.877979	1	-0.674231	-0.674429	3.95647	0.0030636	0.0779564	0.476507	0.476664	3.95647	0.0382402	0.496784	0.14721	0.147249	3.95647	0.557659	0.953514	-0.398887	-0.399015	3.95647	0.0868504	0.366746	0.546097	0.546264	3.95647	0.0163096	0.226101	0.623717	0.623913
104009	Qsox1	quiescin Q6 sulfhydryl oxidase 1	0.574903	0.57498	5.21559	0.00244527	0.0249415	0.744409	0.744503	5.21559	8.15761e-05	0.00150534	-0.169506	-0.169524	5.21559	0.516566	1	-0.340914	-0.340951	5.21559	0.108892	0.535707	0.0851884	0.0851974	5.21559	0.769762	1	-0.204584	-0.204615	5.21559	0.410227	1	0.403495	0.403552	5.21559	0.046888	0.264541	0.660091	0.660177	5.21559	0.000447072	0.0088359	-0.256596	-0.256625	5.21559	0.269848	0.867553	0.198911	0.198937
104010	Cdh22	cadherin 22	0.964152	0.964656	3.00583	0.000509297	0.0073612	0.836331	0.836787	3.00583	0.00197488	0.0189352	0.127821	0.12787	3.00583	0.630842	1	-0.828544	-0.828995	3.00583	0.00229292	0.0615871	-0.913344	-0.913813	3.00583	0.000899888	0.0335317	-0.0322503	-0.0322737	3.00583	0.904781	1	0.00778703	0.00779186	3.00583	0.977024	1	0.0508079	0.0508434	3.00583	0.85024	1	-0.0430208	-0.0430515	3.00583	0.873452	1	-0.0244633	-0.0244819
104027	Synpo	synaptopodin	-0.0644785	-0.0645399	2.40373	0.823807	1	-0.164284	-0.164442	2.40373	0.570588	0.869951	0.099806	0.0999023	2.40373	0.731942	1	0.548257	0.54872	2.40373	0.06034	0.407727	0.813831	0.814422	2.40373	0.0066099	0.1286	0.637273	0.638002	2.40373	0.0316665	0.456538	0.383973	0.384278	2.40373	0.182176	0.583777	0.749352	0.749882	2.40373	0.0110103	0.0952042	-0.36538	-0.365604	2.40373	0.201957	0.783637	1.02125	1.02228
104080	Nxph4	neurexophilin 4	0.960727	0.961559	2.80699	0.00165265	0.0184526	1.42858	1.42966	2.80699	1.3838e-05	0.000335355	-0.467854	-0.468098	2.80699	0.0987042	0.939226	-0.110046	-0.110096	2.80699	0.696776	1	0.0853499	0.085401	2.80699	0.763909	1	-0.142804	-0.142963	2.80699	0.622108	1	1.31854	1.31956	2.80699	4.26226e-05	0.0013063	1.04608	1.04696	2.80699	0.000683428	0.0122491	0.272458	0.2726	2.80699	0.334711	0.921946	1.17573	1.1766
104103	Airn	antisense Igf2r RNA	0.428637	0.428959	2.41015	0.211225	0.546034	0.000451512	0.000449644	2.41015	0.998955	1	0.428185	0.42851	2.41015	0.213307	1	-0.417529	-0.417958	2.41015	0.226822	0.739676	-0.405392	-0.405701	2.41015	0.236544	0.825107	-0.637009	-0.637464	2.41015	0.0671125	0.637783	-0.417077	-0.417508	2.41015	0.225639	0.650086	0.0232445	0.0232585	2.41015	0.945056	1	-0.440322	-0.440767	2.41015	0.201734	0.783509	-1.05409	-1.05497
104156	Etv5	ets variant 5	-0.525821	-0.525832	7.68385	8.18468e-05	0.00166264	-0.660057	-0.660071	7.68385	5.72111e-07	2.23516e-05	0.134235	0.134239	7.68385	0.831395	1	-0.148496	-0.1485	7.68385	0.784474	1	-0.0525347	-0.052536	7.68385	0.9712	1	-0.279971	-0.279976	7.68385	0.184311	0.901976	-0.808553	-0.808571	7.68385	4.18551e-09	5.86548e-07	-0.578356	-0.578368	7.68385	1.12887e-05	0.000476664	-0.230197	-0.230203	7.68385	0.403756	0.973511	-1.08852	-1.08855
104174	Gldc	glycine decarboxylase	-0.558513	-0.558545	6.23823	0.000288669	0.0046873	-0.640782	-0.640819	6.23823	2.65946e-05	0.000583782	0.0822687	0.0822745	6.23823	0.868922	1	-0.114623	-0.114632	6.23823	0.788238	1	0.244631	0.244646	6.23823	0.313476	0.910667	-0.0539217	-0.0539242	6.23823	0.9263	1	-0.755405	-0.755451	6.23823	1.03086e-06	5.60758e-05	-0.313882	-0.313899	6.23823	0.115657	0.432267	-0.441522	-0.441552	6.23823	0.00747533	0.143846	-0.809326	-0.809375
104175	Sbk1	SH3-binding kinase 1	0.59647	0.596474	9.5908	1.57873e-08	1.32169e-06	0.665246	0.66525	9.5908	6.3308e-10	7.28758e-08	-0.0687755	-0.0687759	9.5908	0.99593	1	-0.248816	-0.248817	9.5908	0.347265	0.871369	-0.173392	-0.173393	9.5908	0.849367	1	-0.239509	-0.239511	9.5908	0.417035	1	0.41643	0.416433	9.5908	0.000275857	0.00592755	0.423078	0.423081	9.5908	0.000189613	0.00443402	-0.0066478	-0.00664784	9.5908	0.999855	1	0.176922	0.176923
104215	Rhoq	ras homolog family member Q	0.355724	0.355748	6.15628	0.0399325	0.194163	0.487298	0.48733	6.15628	0.000865146	0.00998869	-0.131575	-0.131582	6.15628	0.795439	1	-0.105588	-0.105594	6.15628	0.866023	1	-0.123737	-0.123745	6.15628	0.818243	1	-0.470774	-0.470806	6.15628	0.00145913	0.0951192	0.38171	0.381736	6.15628	0.0204189	0.149633	0.231986	0.232003	6.15628	0.37798	0.787388	0.149724	0.149733	6.15628	0.735175	1	-0.0890642	-0.0890694
104263	Kdm3a	lysine (K)-specific demethylase 3A	-0.448934	-0.448958	6.44163	0.00478091	0.0421029	-0.340203	-0.34022	6.44163	0.0669625	0.244291	-0.108732	-0.108738	6.44163	0.823048	1	0.377156	0.377175	6.44163	0.0299454	0.286368	0.257929	0.257944	6.44163	0.267758	0.864665	-0.00792284	-0.0079232	6.44163	0.991557	1	0.036953	0.0369547	6.44163	0.958432	1	-0.191005	-0.191014	6.44163	0.537927	0.908728	0.227958	0.227969	6.44163	0.382965	0.958717	0.0290302	0.0290315
104362	Meig1	meiosis expressed gene 1	-0.00330615	-0.00330751	4.16845	0.989687	1	0.740478	0.740652	4.16845	0.00127819	0.0135744	-0.743785	-0.74396	4.16845	0.00129693	0.109526	0.347363	0.347419	4.16845	0.140627	0.601813	-0.0646012	-0.0646219	4.16845	0.800681	1	0.731167	0.731456	4.16845	0.00181768	0.110195	1.08784	1.08807	4.16845	1.09731e-05	0.000412856	-0.0679073	-0.0679294	4.16845	0.790556	1	1.15575	1.156	4.16845	4.5829e-06	0.000995828	1.81901	1.81953
104383	Rcor2	REST corepressor 2	1.04325	1.04333	6.21693	3.84025e-09	3.80854e-07	0.861167	0.861235	6.21693	1.67093e-07	7.8815e-06	0.182081	0.182091	6.21693	0.542582	1	0.161133	0.161141	6.21693	0.620184	1	0.166909	0.166917	6.21693	0.600345	1	-0.608219	-0.608271	6.21693	0.00012908	0.0196558	1.0223	1.02238	6.21693	5.52904e-09	7.0812e-07	1.21016	1.21024	6.21693	1.3676e-10	3.34784e-08	-0.187858	-0.187867	6.21693	0.521775	1	0.414081	0.414106
104418	Dgkz	diacylglycerol kinase zeta	0.693146	0.693175	6.82744	2.28475e-06	8.76681e-05	0.631014	0.631041	6.82744	1.55907e-05	0.000368593	0.0621318	0.0621339	6.82744	0.928243	1	-0.182852	-0.182858	6.82744	0.57958	1	-0.121174	-0.121178	6.82744	0.802099	1	-0.158162	-0.15817	6.82744	0.677053	1	0.448162	0.448183	6.82744	0.0042837	0.0485879	0.571972	0.571997	6.82744	9.90808e-05	0.00264293	-0.123809	-0.123814	6.82744	0.793986	1	0.29	0.290012
104445	Cdc42ep1	CDC42 effector protein (Rho GTPase binding) 1	-0.195606	-0.19562	5.9204	0.468159	0.82449	-0.30784	-0.307863	5.9204	0.14354	0.403185	0.112234	0.112243	5.9204	0.740501	1	-0.275225	-0.27525	5.9204	0.218497	0.726847	0.321388	0.321411	5.9204	0.118466	0.630545	-0.266745	-0.266761	5.9204	0.240521	0.970688	-0.583064	-0.583114	5.9204	0.000574216	0.0106063	0.125782	0.12579	5.9204	0.704076	0.993588	-0.708847	-0.708904	5.9204	2.65887e-05	0.00307903	-0.849809	-0.849875
104582	Rprml	reprimo-like	-0.259446	-0.259955	0.118076	0.680719	0.957203	-1.86211	-1.86892	0.118076	0.00834814	0.0561938	1.60266	1.60896	0.118076	0.0207639	0.541907	-1.4435	-1.45974	0.118076	0.0486616	0.362926	-2.15899	-2.16971	0.118076	0.00333039	0.081734	6.40999	6.64977	0.118076	2.8909e-07	0.000232947	-3.30561	-3.32865	0.118076	9.12014e-05	0.00239314	-2.41843	-2.42967	0.118076	0.00129792	0.0200323	-0.887178	-0.898985	0.118076	0.217859	0.802969	3.10438	3.32112
104625	Cnot6	CCR4-NOT transcription complex, subunit 6	0.0155976	0.0155979	7.90276	0.975483	1	0.00508791	0.005088	7.90276	0.992045	1	0.0105097	0.0105099	7.90276	0.983487	1	0.393852	0.393858	7.90276	0.028305	0.277178	-0.0941587	-0.0941606	7.90276	0.821176	1	0.065277	0.0652782	7.90276	0.887141	1	0.39894	0.398946	7.90276	0.0253556	0.174751	-0.0785611	-0.0785627	7.90276	0.858619	1	0.477501	0.477509	7.90276	0.00415336	0.101825	0.464217	0.464225
104725	Sptssa	serine palmitoyltransferase, small subunit A	-0.0864264	-0.0864284	7.50131	0.957696	1	-0.205351	-0.205356	7.50131	0.564391	0.865042	0.118925	0.118928	7.50131	0.907019	1	-0.0995809	-0.0995836	7.50131	0.940832	1	-0.0446257	-0.0446268	7.50131	0.986816	1	-0.176299	-0.176303	7.50131	0.716162	1	-0.304932	-0.30494	7.50131	0.0989042	0.42056	-0.131052	-0.131055	7.50131	0.879759	1	-0.17388	-0.173885	7.50131	0.726396	1	-0.481232	-0.481243
104732	Tedc1	tubulin epsilon and delta complex 1	0.468909	0.46899	4.90024	0.0104109	0.0752939	0.52309	0.523179	4.90024	0.00338884	0.028228	-0.0541813	-0.054189	4.90024	0.877004	1	0.0595214	0.0595295	4.90024	0.864451	1	0.410372	0.410424	4.90024	0.0305852	0.317602	-0.0705913	-0.0706052	4.90024	0.834802	1	0.582612	0.582708	4.90024	0.000908902	0.0152448	0.879281	0.879413	4.90024	1.06503e-06	6.6015e-05	-0.296669	-0.296705	4.90024	0.171168	0.735766	0.51202	0.512103
104759	Pld4	phospholipase D family, member 4	1.28004	1.28019	5.18927	2.54229e-10	4.02995e-08	0.754081	0.754183	5.18927	9.01696e-06	0.000235567	0.525958	0.526003	5.18927	0.00211501	0.153767	-0.644061	-0.644145	5.18927	0.000138383	0.00863285	-0.80343	-0.803508	5.18927	2.50975e-06	0.000422052	-0.0695369	-0.0695487	5.18927	0.850586	1	0.110019	0.110038	5.18927	0.74323	1	0.476608	0.476679	5.18927	0.00692074	0.0683207	-0.366589	-0.366641	5.18927	0.0593211	0.45466	0.0404823	0.040489
104776	Aldh6a1	aldehyde dehydrogenase family 6, subfamily A1	-0.747105	-0.747126	7.24078	1.34703e-07	8.43047e-06	-0.968259	-0.968288	7.24078	3.88972e-10	4.91656e-08	0.221154	0.221163	7.24078	0.429189	1	0.0774079	0.077411	7.24078	0.922813	1	-0.0347163	-0.0347176	7.24078	0.973373	1	-0.151233	-0.151236	7.24078	0.738424	1	-0.890852	-0.890877	7.24078	2.29364e-09	3.49265e-07	-0.781822	-0.781843	7.24078	4.64814e-08	4.45002e-06	-0.10903	-0.109034	7.24078	0.862066	1	-1.04208	-1.04211
104885	Tmem179	transmembrane protein 179	0.625235	0.625359	4.33768	0.000524883	0.00755824	0.442847	0.44294	4.33768	0.0204634	0.107503	0.182388	0.182418	4.33768	0.488923	1	-0.395392	-0.395473	4.33768	0.0459431	0.353137	-0.921194	-0.921398	4.33768	1.1648e-06	0.000239638	0.0389303	0.0389398	4.33768	0.904631	1	0.0474558	0.0474672	4.33768	0.883103	1	-0.295959	-0.296039	4.33768	0.178296	0.551036	0.343414	0.343506	4.33768	0.099654	0.58101	0.0863861	0.0864069
104886	Rab15	RAB15, member RAS oncogene family	0.415925	0.416033	4.15625	0.0426181	0.202642	0.606792	0.606939	4.15625	0.00169507	0.0168367	-0.190867	-0.190907	4.15625	0.446484	1	-0.0962328	-0.0962523	4.15625	0.729473	1	-0.245068	-0.245128	4.15625	0.298887	0.897086	0.176098	0.176154	4.15625	0.488509	1	0.510559	0.510687	4.15625	0.00952083	0.088013	0.170857	0.170905	4.15625	0.505004	0.887843	0.339702	0.339782	4.15625	0.115708	0.616658	0.686657	0.686841
105000	Dnal1	dynein, axonemal, light chain 1	-0.788494	-0.789002	2.88333	0.00532997	0.0457101	-0.167101	-0.167188	2.88333	0.542687	0.848494	-0.621393	-0.621814	2.88333	0.0258965	0.605576	0.132913	0.132983	2.88333	0.628998	1	0.491278	0.491625	2.88333	0.0760571	0.517911	0.827755	0.828297	2.88333	0.00361134	0.160921	-0.0341885	-0.0342052	2.88333	0.900901	1	-0.297216	-0.297377	2.88333	0.276884	0.686055	0.263027	0.263171	2.88333	0.337051	0.923746	0.793567	0.794092
105005	Fam84a	family with sequence similarity 84, member A	-0.378054	-0.378078	5.64779	0.0488492	0.221033	-1.19667	-1.19678	5.64779	1.70157e-09	1.67891e-07	0.81862	0.818698	5.64779	2.76499e-06	0.00148534	0.243207	0.243235	5.64779	0.307641	0.83529	-1.19334	-1.19347	5.64779	2.15245e-09	1.60101e-06	0.585064	0.585104	5.64779	0.00059841	0.0548467	-0.953467	-0.95354	5.64779	1.35135e-07	9.89829e-06	-1.57139	-1.57155	5.64779	4.91788e-12	1.90214e-09	0.617925	0.618006	5.64779	0.000340757	0.0185631	-0.368402	-0.368437
105171	Arrdc3	arrestin domain containing 3	-0.338452	-0.33847	6.30678	0.0710818	0.279953	-0.528377	-0.528406	6.30678	0.000554009	0.00707661	0.189925	0.189937	6.30678	0.534556	1	0.239906	0.23992	6.30678	0.333165	0.861114	-0.0974831	-0.0974889	6.30678	0.845717	1	0.260275	0.260288	6.30678	0.259486	0.988675	-0.288472	-0.288486	6.30678	0.172593	0.566731	-0.435935	-0.435958	6.30678	0.00731143	0.0710242	0.147464	0.147472	6.30678	0.699485	1	-0.0281966	-0.0281981
105180375	Tmem265	transmembrane protein 265	-0.203497	-0.203692	1.95407	0.521633	0.861472	-0.360221	-0.360588	1.95407	0.260006	0.577429	0.156724	0.156896	1.95407	0.624295	1	-0.666767	-0.667742	1.95407	0.0464293	0.35445	-0.14369	-0.143849	1.95407	0.652816	1	0.477285	0.477792	1.95407	0.138571	0.822639	-1.02699	-1.02833	1.95407	0.00295955	0.0369257	-0.347187	-0.347542	1.95407	0.276566	0.685795	-0.679801	-0.680789	1.95407	0.0422901	0.385981	-0.549703	-0.550539
105193	Nhlrc1	NHL repeat containing 1	-0.0914915	-0.0915164	3.96862	0.719792	0.975887	-0.265798	-0.265875	3.96862	0.268633	0.587466	0.174307	0.174359	3.96862	0.483496	1	0.319877	0.319969	3.96862	0.175205	0.663849	-0.467028	-0.467183	3.96862	0.0405634	0.37284	-0.176342	-0.176386	3.96862	0.477551	1	0.0540793	0.0540934	3.96862	0.833416	1	-0.558519	-0.558699	3.96862	0.0128785	0.106663	0.612598	0.612792	3.96862	0.00635281	0.130007	-0.122262	-0.122292
105242418	Gm38690	predicted gene, 38690	-1.25766	-1.25887	1.93861	0.00476409	0.0419739	-1.08532	-1.08629	1.93861	0.0126948	0.0763862	-0.17234	-0.172574	1.93861	0.682983	1	0.218529	0.218783	1.93861	0.601789	1	-0.288271	-0.28872	1.93861	0.498042	1	1.55988	1.56155	1.93861	0.000770141	0.0630736	-0.866794	-0.86751	1.93861	0.0416922	0.244403	-1.54593	-1.54759	1.93861	0.000827287	0.0142339	0.679141	0.680078	1.93861	0.112756	0.609807	0.693084	0.694041
105242624	Gm38785	predicted gene, 38785	-1.73766	-1.7424	0.532385	0.00531437	0.0456168	-2.27153	-2.27932	0.532385	0.00066808	0.00818239	0.533864	0.536914	0.532385	0.371713	1	1.06356	1.06868	0.532385	0.078299	0.464486	0.156203	0.156904	0.532385	0.787307	1	1.43461	1.43803	0.532385	0.0169163	0.344001	-1.20797	-1.21063	0.532385	0.0394873	0.23613	-1.58146	-1.5855	0.532385	0.00953346	0.0861128	0.373493	0.374866	0.532385	0.513972	1	0.226638	0.2274
105242661	Gm38814	predicted gene, 38814	-2.7714	-2.79073	0.0310714	0.00191614	0.0206672	-1.26337	-1.26798	0.0310714	0.0999948	0.318433	-1.50803	-1.52275	0.0310714	0.0680863	0.829876	0.593053	0.595719	0.0310714	0.430319	0.935366	1.26347	1.27676	0.0310714	0.122111	0.638194	1.45237	1.45806	0.0310714	0.0615885	0.616172	-0.670321	-0.672262	0.0310714	0.364147	0.812583	-1.50793	-1.51397	0.0310714	0.0535343	0.273495	0.837605	0.841713	0.0310714	0.270072	0.868029	0.782051	0.785803
105242662	Gm38815	predicted gene, 38815	-1.75549	-1.75781	2.01625	0.000156001	0.00280382	-1.28328	-1.28468	2.01625	0.00292459	0.0253172	-0.472216	-0.473135	2.01625	0.258433	1	0.503531	0.504232	2.01625	0.218545	0.726847	1.10698	1.10874	2.01625	0.0101841	0.167866	0.458758	0.45912	2.01625	0.248799	0.978713	-0.779745	-0.780444	2.01625	0.0550881	0.292357	-0.648517	-0.649069	2.01625	0.106755	0.412971	-0.131229	-0.131376	2.01625	0.743161	1	-0.320988	-0.321325
105242688	Gm38837	predicted gene, 38837	-1.20285	-1.2036	2.66017	0.00522671	0.0450242	-1.82551	-1.82699	2.66017	0.000119313	0.00205102	0.622668	0.62339	2.66017	0.143011	1	1.38832	1.38959	2.66017	0.00196839	0.0554101	-0.247876	-0.248129	2.66017	0.550003	1	0.871958	0.872436	2.66017	0.035237	0.480194	-0.437191	-0.437396	2.66017	0.27563	0.719936	-1.45072	-1.45173	2.66017	0.00113341	0.0180701	1.01353	1.01433	2.66017	0.0172535	0.233518	0.434767	0.43504
105242851	Gm38947	predicted gene, 38947	-1.13174	-1.13242	2.91119	0.00191929	0.0206834	-0.908298	-0.908801	2.91119	0.0103737	0.0660356	-0.223438	-0.223618	2.91119	0.515069	1	0.736724	0.737154	2.91119	0.0356485	0.309828	0.129857	0.129962	2.91119	0.704545	1	0.632076	0.632392	2.91119	0.0652821	0.631557	-0.171575	-0.171647	2.91119	0.604247	0.973119	-1.00188	-1.00246	2.91119	0.00511816	0.0554822	0.830305	0.830811	2.91119	0.0187236	0.245323	0.460501	0.460745
105242858	Gm38951	predicted gene, 38951	0.081717	0.0823377	-0.69088	0.92127	1	-3.28243	-3.38575	-0.69088	0.00278437	0.0243652	3.36415	3.46809	-0.69088	0.00236497	0.164519	4.11057	4.21883	-0.69088	0.000385815	0.0174329	-0.583649	-0.588972	-0.69088	0.488401	1	-0.220512	-0.222125	-0.69088	0.788934	1	0.828144	0.833082	-0.69088	0.317762	0.765066	-0.501932	-0.506634	-0.69088	0.548484	0.915886	1.33008	1.33972	-0.69088	0.120796	0.628656	0.607632	0.610957
105242948	Gm39019	predicted gene, 39019	-1.46198	-1.48319	-1.71054	0.255123	0.604858	-6.93174	-1.44269e+08	-1.71054	0.00155935	0.0157803	5.46977	1.44269e+08	-1.71054	0.0101187	0.395323	5.08644	1.44269e+08	-1.71054	0.0158155	0.201088	1.13759	1.15567	-1.71054	0.37453	0.96253	2.10103	2.1419	-1.71054	0.118259	0.781886	-1.8453	-1.87662	-1.71054	0.158028	0.541382	-0.324388	-0.327514	-1.71054	0.790093	1	-1.52091	-1.5491	-1.71054	0.241753	0.836057	0.255735	0.265281
105243046	Gm39081	predicted gene, 39081	-3.15149	-3.16234	-0.581161	0.023134	0.133231	-4.11204	-4.13446	-0.581161	0.00584197	0.0429968	0.960547	0.972122	-0.581161	0.451951	1	1.01526	1.02737	-0.581161	0.422301	0.927948	0.0324634	0.0328691	-0.581161	0.979044	1	1.16856	1.1713	-0.581161	0.389473	1	-3.09678	-3.10709	-0.581161	0.0241002	0.167894	-3.11903	-3.12947	-0.581161	0.0239277	0.163877	0.02225	0.0223816	-0.581161	0.98556	1	-1.92821	-1.93579
105243158	Gm39155	predicted gene, 39155	-1.18122	-1.18808	-0.557359	0.111036	0.372924	-1.37327	-1.38191	-0.557359	0.0683017	0.247543	0.192056	0.193831	-0.557359	0.793584	1	0.196083	0.19788	-0.557359	0.78862	1	-2.15086	-2.19463	-0.557359	0.0120743	0.186836	0.524946	0.527325	-0.557359	0.461508	1	-1.17719	-1.18403	-0.557359	0.110969	0.447966	-3.33208	-3.38271	-0.557359	0.000352628	0.00727798	2.15489	2.19868	-0.557359	0.0117157	0.186171	-0.652243	-0.656709
105243285	Gm39248	predicted gene, 39248	-0.640358	-0.642122	0.370981	0.277014	0.632827	-1.79736	-1.80517	0.370981	0.00608431	0.0442514	1.157	1.16305	0.370981	0.065563	0.816435	0.951475	0.956775	0.370981	0.125451	0.575492	-0.236065	-0.236914	0.370981	0.689183	1	0.846776	0.849299	0.370981	0.155721	0.857729	-0.845881	-0.848398	0.370981	0.155276	0.535464	-0.876423	-0.879037	0.370981	0.141946	0.485616	0.0305421	0.0306385	0.370981	0.958712	1	0.000895248	0.000901067
105243512	Gm39412	predicted gene, 39412	-0.707932	-0.709807	0.579222	0.147338	0.445006	-0.910071	-0.91268	0.579222	0.0666306	0.243586	0.202139	0.202873	0.579222	0.678859	1	-0.752935	-0.756786	0.579222	0.136994	0.596026	0.167307	0.167838	0.579222	0.729161	1	0.198526	0.198967	0.579222	0.676419	1	-1.66301	-1.66947	0.579222	0.002065	0.0279462	-0.540625	-0.541969	0.579222	0.261349	0.667371	-1.12238	-1.1275	0.579222	0.0291797	0.317204	-1.46448	-1.4705
105243585	Gm39469	predicted gene, 39469	-0.267004	-0.267022	6.02756	0.265651	0.618371	-0.444747	-0.444778	6.02756	0.0505276	0.200565	0.177742	0.177756	6.02756	0.47437	1	0.554579	0.554616	6.02756	0.013233	0.180093	-0.361491	-0.36152	6.02756	0.120848	0.6353	0.114058	0.114065	6.02756	0.652995	1	0.109832	0.109838	6.02756	0.665525	0.998959	-0.628495	-0.628542	6.02756	0.00489205	0.053323	0.738327	0.73838	6.02756	0.00101631	0.0400293	0.22389	0.223904
105243672	Gm39503	predicted gene, 39503	-3.95947	-3.97353	0.338005	0.00168435	0.0186699	-4.40121	-4.42074	0.338005	0.000805332	0.00945618	0.441746	0.447211	0.338005	0.67867	1	3.96855	3.98772	0.338005	0.00195182	0.0551039	3.62074	3.6345	0.338005	0.00360943	0.0856476	0.81115	0.811982	0.338005	0.438903	1	-0.43266	-0.433029	0.338005	0.676711	1	-0.338728	-0.339031	0.338005	0.745549	1	-0.093932	-0.0939979	0.338005	0.929414	1	0.378489	0.378952
105243853	Gm39585	predicted gene, 39585	-1.20842	-1.21036	1.08134	0.0240979	0.137373	-0.95697	-0.958366	1.08134	0.0674605	0.245552	-0.251447	-0.251999	1.08134	0.626153	1	-0.800222	-0.80236	1.08134	0.130535	0.584492	-1.50537	-1.51168	1.08134	0.00910186	0.157032	1.0199	1.02143	1.08134	0.0521814	0.565005	-1.75719	-1.76073	1.08134	0.00199965	0.0273296	-2.71379	-2.72205	1.08134	3.28097e-05	0.00108648	0.956597	0.961319	1.08134	0.0849699	0.542495	-0.737289	-0.739295
105243962	Gm39668	predicted gene, 39668	-1.48721	-1.49024	1.41743	0.0052974	0.0454913	-0.283492	-0.283856	1.41743	0.556317	0.859726	-1.20372	-1.20639	1.41743	0.0213014	0.547075	-0.0144111	-0.0144329	1.41743	0.976193	1	0.330268	0.331213	1.41743	0.513278	1	0.629017	0.629931	1.41743	0.198259	0.920182	-0.297903	-0.298289	1.41743	0.535109	0.940514	-1.15695	-1.15903	1.41743	0.0240404	0.164224	0.859042	0.860741	1.41743	0.0879664	0.549549	0.331114	0.331642
105244069	Gm39747	predicted gene, 39747	-0.244615	-0.247999	-2.04486	0.839066	1	-6.31737	-1.44269e+08	-2.04486	0.00262435	0.0233882	6.07276	1.44269e+08	-2.04486	0.00370264	0.213115	5.278	1.44269e+08	-2.04486	0.0103342	0.154445	-0.67837	-0.691788	-2.04486	0.584989	1	4.3921	4.82531	-2.04486	0.00993123	0.27225	-1.03938	-1.05871	-2.04486	0.402572	0.843433	-0.922985	-0.939787	-2.04486	0.455001	0.847876	-0.116393	-0.11892	-2.04486	0.926351	1	3.35272	3.76661
105244071	Gm39749	predicted gene, 39749	-6.57732	-1.44269e+08	-1.50365	0.0022224	0.0231943	0.486207	0.490555	-1.50365	0.681909	0.938942	-7.06353	-1.44269e+08	-1.50365	0.00121054	0.10526	-2.22802	-2.26859	-1.50365	0.0920829	0.496457	5.11113	1.44269e+08	-1.50365	0.0153466	0.214752	0.0512359	0.051854	-1.50365	0.965605	1	-1.74182	-1.77804	-1.50365	0.178101	0.57645	-1.46619	-1.49402	-1.50365	0.247986	0.651339	-0.275625	-0.284023	-1.50365	0.832308	1	-1.69058	-1.72619
105244151	LOC105244151	uncharacterized LOC105244151	0.0531247	0.0533175	0.221307	0.929835	1	0.519814	0.521268	0.221307	0.390391	0.719574	-0.466689	-0.467951	0.221307	0.441746	1	-0.290921	-0.291651	0.221307	0.628565	1	-1.67508	-1.68523	0.221307	0.013103	0.195524	2.49161	2.51364	0.221307	0.000855197	0.0664203	0.228893	0.229617	0.221307	0.703561	1	-1.62196	-1.63191	0.221307	0.0154808	0.121601	1.85085	1.86153	0.221307	0.00674052	0.135083	2.7205	2.74326
105244329	Gm14199	predicted gene 14199	-2.75048	-2.78167	-1.14697	0.0127191	0.0870916	-4.3069	-4.40967	-1.14697	0.00102974	0.0114514	1.55642	1.62801	-1.14697	0.186722	1	2.57971	2.66997	-1.14697	0.031592	0.292885	0.672117	0.685477	-1.14697	0.513292	1	3.55609	3.6143	-1.14697	0.00302514	0.14481	-1.72719	-1.73971	-1.14697	0.0877043	0.393439	-2.07836	-2.09619	-1.14697	0.0462389	0.248255	0.351173	0.356479	-1.14697	0.724033	1	1.8289	1.8746
105244477	Gm40078	predicted gene, 40078	-1.25453	-1.25694	1.32676	0.00258691	0.0260428	-1.60834	-1.61192	1.32676	0.000267264	0.0039335	0.353811	0.354973	1.32676	0.379654	1	1.51709	1.52055	1.32676	0.000505386	0.0210186	0.345965	0.346856	1.32676	0.380781	0.968172	0.417646	0.418232	1.32676	0.27699	1	-0.0912533	-0.0913678	1.32676	0.809108	1	-0.908563	-0.910088	1.32676	0.0224652	0.157069	0.81731	0.81872	1.32676	0.038941	0.370246	0.326392	0.326865
105244487	LOC105244487	uncharacterized LOC105244487	-2.45048	-2.47575	-0.571646	0.00658956	0.0535443	-2.69052	-2.72146	-0.571646	0.00368618	0.0302064	0.240039	0.245716	-0.571646	0.77973	1	2.64552	2.67629	-0.571646	0.00421616	0.0898968	1.83839	1.86066	-0.571646	0.0350321	0.343205	1.82636	1.84053	-0.571646	0.0303658	0.447595	-0.0450035	-0.0451728	-0.571646	0.953213	1	-0.612098	-0.615084	-0.571646	0.434677	0.835483	0.567095	0.569911	-0.571646	0.469663	1	1.78135	1.79535
105244523	Gm40117	predicted gene, 40117	-1.55291	-1.57086	-1.21904	0.0963486	0.340128	-4.51011	-4.72646	-1.21904	0.000448495	0.00599823	2.95721	3.1556	-1.21904	0.013678	0.465704	3.70574	3.91517	-1.21904	0.00263074	0.0662224	0.880304	0.89277	-1.21904	0.337085	0.933025	1.11122	1.12201	-1.21904	0.218583	0.949317	-0.804374	-0.811286	-1.21904	0.364513	0.812644	-0.672602	-0.678086	-1.21904	0.445603	0.841525	-0.131773	-0.133201	-1.21904	0.88181	1	0.306842	0.310726
105244554	Gm40147	predicted gene, 40147	5.50585	1.44269e+08	-1.81658	0.016173	0.103566	7.11487	1.44269e+08	-1.81658	0.00295895	0.0254891	-1.60902	-1.63068	-1.81658	0.283213	1	-1.61997	-1.64188	-1.81658	0.278782	0.804202	0.308132	0.314405	-1.81658	0.834895	1	-4.73511	-1.44269e+08	-1.81658	0.0355217	0.481907	5.49491	1.44269e+08	-1.81658	0.0162027	0.127248	5.81398	1.44269e+08	-1.81658	0.0114562	0.0980315	-0.319073	-0.325601	-1.81658	0.828593	1	0.759795	0.781838
105244627	Gm40208	predicted gene, 40208	-2.04947	-2.0525	1.92432	1.0875e-05	0.000320108	-1.22949	-1.23078	1.92432	0.002426	0.0220575	-0.819982	-0.82172	1.92432	0.0423855	0.727819	0.990073	0.991192	1.92432	0.0123116	0.171167	0.913274	0.915156	1.92432	0.0241809	0.277363	1.39444	1.39602	1.92432	0.000772969	0.0630736	-0.239417	-0.23959	1.92432	0.517222	0.928898	-1.1362	-1.13735	1.92432	0.00441758	0.0495865	0.89678	0.897756	1.92432	0.0215809	0.268222	1.15503	1.15643
105244662	Cyp4x1os	cytochrome P450, family 4, subfamily x, polypeptide 1, opposite strand	-2.70889	-2.73033	-0.344869	0.00302623	0.0296025	-1.53261	-1.53988	-0.344869	0.0592871	0.224111	-1.17628	-1.19045	-0.344869	0.160878	1	0.476538	0.479674	-0.344869	0.543862	1	-0.441962	-0.451124	-0.344869	0.607072	1	1.17116	1.17596	-0.344869	0.137949	0.821256	-1.05607	-1.06021	-0.344869	0.177869	0.576097	-3.15085	-3.18145	-0.344869	0.000999113	0.0165144	2.09478	2.12124	-0.344869	0.0182945	0.24117	0.115091	0.11575
105244746	Gm40302	predicted gene, 40302	-4.25007	-4.46417	-1.73849	0.0057727	0.0485384	-3.36028	-3.46614	-1.73849	0.0169484	0.0943753	-0.889789	-0.998033	-1.73849	0.554353	1	1.86087	1.94654	-1.73849	0.16597	0.648725	3.30196	3.50604	-1.73849	0.0258621	0.287276	1.93622	1.96803	-1.73849	0.115984	0.776668	-1.49941	-1.5196	-1.73849	0.209384	0.626628	-0.948108	-0.958129	-1.73849	0.412249	0.817774	-0.551298	-0.561473	-1.73849	0.640048	1	0.436814	0.44843
105244756	Gm40309	predicted gene, 40309	-0.761185	-0.762139	1.45752	0.0566253	0.24308	-1.52534	-1.52792	1.45752	0.000537099	0.00689247	0.764156	0.765782	1.45752	0.0626981	0.807422	0.702401	0.703925	1.45752	0.0852841	0.480704	-0.469966	-0.470861	1.45752	0.240731	0.831774	0.946839	0.948123	1.45752	0.0197588	0.369203	-0.822939	-0.823996	1.45752	0.0398406	0.237875	-1.23115	-1.233	1.45752	0.00341538	0.041333	0.408211	0.409005	1.45752	0.306314	0.896987	0.1239	0.124128
105244786	Gm40336	predicted gene, 40336	-3.26217	-3.34285	-1.407	0.00389178	0.0360156	-2.92714	-2.9886	-1.407	0.0072317	0.0505618	-0.335032	-0.354252	-1.407	0.754586	1	0.845598	0.877254	-1.407	0.407405	0.915502	2.52099	2.59548	-1.407	0.0201394	0.252088	1.05659	1.06637	-1.407	0.251818	0.982431	-2.08154	-2.11135	-1.407	0.0370662	0.225842	-0.74118	-0.747376	-1.407	0.414686	0.820334	-1.34036	-1.36397	-1.407	0.166531	0.726817	-1.02494	-1.04498
105244811	Gm40356	predicted gene, 40356	-1.50172	-1.50601	0.742863	0.0095754	0.0707518	-1.58484	-1.58955	0.742863	0.006923	0.0489879	0.0831183	0.0835401	0.742863	0.880944	1	0.942481	0.945878	0.742863	0.092853	0.498636	0.743141	0.745816	0.742863	0.179419	0.74507	0.757692	0.759328	0.742863	0.160746	0.863443	-0.642355	-0.643674	0.742863	0.229739	0.657066	-0.758577	-0.760196	0.742863	0.159822	0.518504	0.116221	0.116522	0.742863	0.827443	1	0.115337	0.115653
105244835	Gm40371	predicted gene, 40371	-0.72812	-0.728619	2.55397	0.00892987	0.0671703	-0.368248	-0.368468	2.55397	0.176211	0.458474	-0.359873	-0.360151	2.55397	0.190948	1	-0.491057	-0.491454	2.55397	0.0745456	0.453488	-0.0523892	-0.0524323	2.55397	0.850447	1	0.591618	0.592001	2.55397	0.0306274	0.449515	-0.859305	-0.859922	2.55397	0.00250015	0.0325154	-0.78051	-0.781051	2.55397	0.00535054	0.0574856	-0.0787955	-0.0788709	2.55397	0.776553	1	-0.267687	-0.26792
105244875	Gm40406	predicted gene, 40406	-0.936718	-0.94216	-1.06938	0.29368	0.653188	-4.5085	-4.64391	-1.06938	0.00034569	0.00483132	3.57178	3.70175	-1.06938	0.00270451	0.178901	2.57201	2.69051	-1.06938	0.0235388	0.251362	-0.790562	-0.798927	-1.06938	0.384608	0.970616	2.98481	3.02694	-1.06938	0.00477552	0.18733	-1.93649	-1.9534	-1.06938	0.0418989	0.245094	-1.72728	-1.74109	-1.06938	0.0655769	0.310627	-0.209209	-0.212308	-1.06938	0.818461	1	1.04832	1.07354
105244890	Gm40418	predicted gene, 40418	0.229904	0.230263	1.55353	0.555601	0.88763	-0.608626	-0.609916	1.55353	0.128948	0.374882	0.83853	0.840179	1.55353	0.039641	0.719153	1.38941	1.39173	1.55353	0.00118294	0.0394206	-0.384996	-0.385652	1.55353	0.329032	0.926087	-0.211505	-0.211836	1.55353	0.587044	1	0.780786	0.781813	1.55353	0.0482305	0.269138	-0.155092	-0.15539	1.55353	0.69224	0.989155	0.935878	0.937203	1.55353	0.0203426	0.259907	0.569281	0.569977
105244944	Gm40466	predicted gene, 40466	-1.41458	-1.41766	1.57336	0.00144295	0.0166897	-0.460894	-0.461585	1.57336	0.249615	0.564322	-0.95369	-0.956072	1.57336	0.0254144	0.600108	0.377527	0.378108	1.57336	0.346896	0.871369	1.16904	1.17178	1.57336	0.00703002	0.134262	-0.192831	-0.193059	1.57336	0.624706	1	-0.0833668	-0.083477	1.57336	0.832969	1	-0.245542	-0.245878	1.57336	0.535563	0.90724	0.162175	0.162401	1.57336	0.683625	1	-0.276198	-0.276536
105245155	Gm40647	predicted gene, 40647	-2.32765	-2.33071	2.06796	1.33524e-05	0.000380298	-2.04767	-2.05005	2.06796	5.951e-05	0.00114857	-0.279971	-0.280654	2.06796	0.535568	1	1.22267	1.22446	2.06796	0.00809933	0.133046	0.991153	0.993059	2.06796	0.0308469	0.318529	0.864509	0.865137	2.06796	0.0458639	0.537804	-0.825007	-0.825595	2.06796	0.055315	0.292918	-1.33649	-1.33765	2.06796	0.00337987	0.0410058	0.511485	0.512053	2.06796	0.233973	0.827507	0.0395019	0.0395416
105245305	Gm40780	predicted gene, 40780	-2.45502	-2.4638	0.886697	0.000709894	0.00966126	-0.977915	-0.979806	0.886697	0.112775	0.343838	-1.4771	-1.48399	0.886697	0.0279438	0.623295	0.187046	0.187515	0.886697	0.757314	1	1.0658	1.07149	0.886697	0.10422	0.593494	0.751132	0.752463	0.886697	0.215056	0.945943	-0.790869	-0.792292	0.886697	0.192366	0.599349	-1.38921	-1.39231	0.886697	0.0290226	0.184871	0.598344	0.60002	0.886697	0.329085	0.91713	-0.039737	-0.0398283
105245383	Gm40848	predicted gene, 40848	0.0877848	0.0878563	2.38797	0.850438	1	-0.587776	-0.588359	2.38797	0.214449	0.516444	0.67556	0.676215	2.38797	0.152681	1	0.955629	0.956469	2.38797	0.0454475	0.351986	0.39007	0.390323	2.38797	0.400315	0.979713	1.1671	1.16854	2.38797	0.0190555	0.366897	0.367854	0.36811	2.38797	0.428345	0.867224	0.477855	0.478179	2.38797	0.307416	0.719369	-0.110001	-0.110069	2.38797	0.810197	1	1.53496	1.53665
105245400	Gm40862	predicted gene, 40862	0.0251492	0.0252166	0.571303	0.958098	1	0.730528	0.732924	0.571303	0.131381	0.379335	-0.705379	-0.707708	0.571303	0.147344	1	0.682828	0.684208	0.571303	0.152634	0.626708	0.359064	0.36043	0.571303	0.450188	1	0.2281	0.229196	0.571303	0.638729	1	1.41336	1.41713	0.571303	0.00530587	0.0570057	0.384213	0.385647	0.571303	0.416181	0.821195	1.02914	1.03149	0.571303	0.0336021	0.340063	1.64146	1.64633
105245415	LOC105245415	uncharacterized LOC105245415	-7.04356	-13.7991	-1.84154	0.00135305	0.0159461	-3.71808	-3.85852	-1.84154	0.0178393	0.0974835	-3.32548	-9.94058	-1.84154	0.118223	0.980331	2.51055	2.6366	-1.84154	0.0952048	0.503877	4.15867	10.8455	-1.84154	0.0482693	0.414328	1.33284	1.34959	-1.84154	0.297103	1	-1.20753	-1.22192	-1.84154	0.339616	0.789211	-2.88489	-2.95362	-1.84154	0.0434166	0.239486	1.67736	1.7317	-1.84154	0.221302	0.809641	0.125302	0.127676
105245439	LOC105245439	centromere protein W pseudogene	-2.00548	-2.01266	0.905279	0.000472389	0.00696306	-0.0863375	-0.0864849	0.905279	0.857171	1	-1.91915	-1.92618	0.905279	0.000753451	0.0779197	-0.512718	-0.513797	0.905279	0.294451	0.819801	0.930806	0.935347	0.905279	0.0760252	0.517877	0.46675	0.467666	0.905279	0.336284	1	-0.599056	-0.600282	0.905279	0.220268	0.643956	-1.07468	-1.07731	0.905279	0.0342717	0.206281	0.475621	0.477032	0.905279	0.336358	0.92354	-0.132306	-0.132616
105245463	Gm40912	predicted gene, 40912	-2.67304	-2.67926	1.05219	6.64628e-05	0.00139861	-3.37141	-3.38236	1.05219	5.64466e-06	0.000157977	0.698375	0.703098	1.05219	0.244064	1	1.64562	1.65388	1.05219	0.00811096	0.133046	0.964497	0.968064	1.05219	0.0934275	0.567617	1.62256	1.62497	1.05219	0.00525735	0.195328	-1.7258	-1.72848	1.05219	0.00331239	0.0402376	-1.70854	-1.7112	1.05219	0.0036657	0.0435984	-0.0172559	-0.0172803	1.05219	0.974655	1	-0.103237	-0.10351
105245518	Gm40964	predicted gene, 40964	-1.16852	-1.1782	-0.810458	0.166025	0.475385	-3.36195	-3.43627	-0.810458	0.00142723	0.0147458	2.19343	2.25807	-0.810458	0.0266586	0.611567	2.66635	2.73585	-0.810458	0.00832798	0.13534	0.938164	0.946461	-0.810458	0.263888	0.860008	0.655288	0.659738	-0.810458	0.422638	1	-0.695597	-0.700422	-0.810458	0.395877	0.83753	-0.230358	-0.231741	-0.810458	0.775164	1	-0.465239	-0.468681	-0.810458	0.570044	1	-0.0403083	-0.0406844
105245650	Gm41077	predicted gene, 41077	-1.47756	-1.47986	1.31386	0.0015129	0.0172919	-1.72671	-1.72969	1.31386	0.000356745	0.00494558	0.249152	0.249824	1.31386	0.568602	1	0.760649	0.762395	1.31386	0.0844502	0.478808	-0.0363042	-0.0363984	1.31386	0.933226	1	1.34618	1.34818	1.31386	0.00320098	0.14845	-0.966061	-0.967292	1.31386	0.0266678	0.180938	-1.51386	-1.51626	1.31386	0.00120633	0.018936	0.547801	0.548969	1.31386	0.205862	0.788357	0.380119	0.380887
105245694	Gm41106	predicted gene, 41106	-1.9017	-1.91293	-0.293153	0.00566092	0.04782	-0.410289	-0.411636	-0.293153	0.500964	0.816187	-1.49141	-1.50129	-0.293153	0.0253784	0.59999	-1.77619	-1.78941	-0.293153	0.00975582	0.149509	0.00891589	0.00907062	-0.293153	0.9888	1	1.61981	1.62833	-0.293153	0.0148523	0.325913	-2.18647	-2.20105	-0.293153	0.00208937	0.0281773	-1.89278	-1.90386	-0.293153	0.00567937	0.0596596	-0.293694	-0.297187	-0.293153	0.649641	1	-0.566662	-0.572716
105245866	Gm15735	predicted gene 15735	-2.44852	-2.4624	-0.734048	0.0416922	0.200021	-4.18401	-4.23324	-0.734048	0.00237985	0.0217402	1.73549	1.77084	-0.734048	0.152659	1	2.96129	3.0065	-0.734048	0.0196908	0.226937	0.635888	0.642086	-0.734048	0.570477	1	2.06621	2.07581	-0.734048	0.0844475	0.693994	-1.22272	-1.22673	-0.734048	0.270166	0.712194	-1.81263	-1.82031	-0.734048	0.112371	0.424692	0.589915	0.593581	-0.734048	0.59015	1	0.84349	0.849072
105245870	Gm41254	predicted gene, 41254	-1.3245	-1.32689	1.10567	0.00893463	0.0671753	-1.42861	-1.4313	1.10567	0.00542262	0.0407571	0.104106	0.104407	1.10567	0.82989	1	0.559742	0.561125	1.10567	0.248431	0.766375	-1.02139	-1.0256	1.10567	0.0504039	0.424917	0.917007	0.918418	1.10567	0.0586068	0.604576	-0.868863	-0.870174	1.10567	0.0715993	0.345197	-2.34589	-2.3525	1.10567	7.32788e-05	0.0020871	1.47703	1.48232	1.10567	0.00605003	0.126482	0.0481442	0.0482441
105245904	Gm41284	predicted gene, 41284	-2.0079	-2.00874	3.37459	1.50018e-05	0.00041505	-1.73083	-1.73147	3.37459	8.90517e-05	0.00162163	-0.277071	-0.277267	3.37459	0.485437	1	0.578228	0.57853	3.37459	0.141136	0.602786	0.210538	0.210685	3.37459	0.595303	1	1.25196	1.25234	3.37459	0.00218849	0.122676	-1.1526	-1.15294	3.37459	0.0041706	0.0475562	-1.79736	-1.79805	3.37459	5.57916e-05	0.00169381	0.644762	0.645112	3.37459	0.101608	0.5856	0.0993595	0.099404
105245987	Gm41355	predicted gene, 41355	-3.65436	-3.72791	-1.1036	0.00274712	0.0273931	-4.93937	-5.13666	-1.1036	0.000504473	0.0065697	1.285	1.40875	-1.1036	0.331651	1	3.43257	3.61833	-1.1036	0.00945672	0.146894	1.73389	1.7898	-1.1036	0.121282	0.636695	0.992326	0.998579	-1.1036	0.304349	1	-1.50679	-1.51833	-1.1036	0.130144	0.48936	-1.92048	-1.93812	-1.1036	0.0617303	0.300101	0.413684	0.419786	-1.1036	0.675953	1	-0.514466	-0.519751
105245994	Gm41361	predicted gene, 41361	-2.10207	-2.10642	0.963511	8.30384e-05	0.00168508	-1.38295	-1.38507	0.963511	0.00394318	0.0317342	-0.719127	-0.721354	0.963511	0.123267	0.984675	0.183403	0.183823	0.963511	0.681935	1	-0.329961	-0.331511	0.963511	0.481585	1	2.01355	2.01758	0.963511	0.00012373	0.0191426	-1.19954	-1.20125	0.963511	0.0103489	0.0931302	-2.43203	-2.43793	0.963511	1.46508e-05	0.000575878	1.23249	1.23669	0.963511	0.0109983	0.179725	0.814006	0.81634
105246114	LOC105246114	uncharacterized LOC105246114	0.138977	0.13932	1.10584	0.744579	0.98836	0.523207	0.524347	1.10584	0.221898	0.526216	-0.384231	-0.385027	1.10584	0.36925	1	-0.89193	-0.894159	1.10584	0.043888	0.346429	-0.169649	-0.170044	1.10584	0.691953	1	-1.07383	-1.07579	1.10584	0.0150836	0.327387	-0.368722	-0.369812	1.10584	0.39269	0.834073	-0.0306723	-0.0307237	1.10584	0.942641	1	-0.33805	-0.339088	1.10584	0.434351	0.993126	-1.44255	-1.44561
105246247	Gm16196	predicted gene 16196	-4.22102	-4.41221	-1.47099	0.0015681	0.0177758	-2.0735	-2.10683	-1.47099	0.0546421	0.21182	-2.14752	-2.30538	-1.47099	0.0834694	0.893312	0.923575	0.94465	-1.47099	0.376683	0.892715	2.79951	2.97374	-1.47099	0.024994	0.282666	0.411494	0.414888	-1.47099	0.673992	1	-1.14992	-1.16218	-1.47099	0.251549	0.688816	-1.42151	-1.43846	-1.47099	0.162636	0.523854	0.271585	0.276285	-1.47099	0.786905	1	-0.738427	-0.74729
105246264	Gm41572	predicted gene, 41572	-2.43783	-2.45474	-0.386036	0.00307812	0.0299737	-2.92247	-2.94771	-0.386036	0.000817866	0.00957428	0.484647	0.492971	-0.386036	0.533276	1	2.06027	2.0824	-0.386036	0.0114556	0.16385	0.94391	0.953913	-0.386036	0.21071	0.79118	2.28374	2.29849	-0.386036	0.00467372	0.184837	-0.862199	-0.865313	-0.386036	0.22612	0.650735	-1.49392	-1.50082	-0.386036	0.0455156	0.246286	0.631717	0.635512	-0.386036	0.379724	0.955827	1.42155	1.43318
105246278	B230354K17Rik	RIKEN cDNA B230354K17 gene	-0.94774	-0.947826	5.75914	7.24112e-07	3.35014e-05	-0.730629	-0.730691	5.75914	5.77973e-05	0.0011211	-0.21711	-0.217135	5.75914	0.378327	1	0.751006	0.751069	5.75914	3.79836e-05	0.00349793	0.449095	0.449143	5.75914	0.0193987	0.246486	0.141214	0.141224	5.75914	0.619844	1	0.0203771	0.0203783	5.75914	0.951418	1	-0.498645	-0.498684	5.75914	0.00731212	0.0710242	0.519022	0.519062	5.75914	0.00495085	0.113173	0.161591	0.161602
105246303	Gm41607	predicted gene, 41607	-1.14571	-1.15202	-0.213448	0.126443	0.405614	-0.134637	-0.135149	-0.213448	0.850485	1	-1.01107	-1.01687	-0.213448	0.176859	1	-0.167596	-0.168289	-0.213448	0.815324	1	0.22484	0.226508	-0.213448	0.760799	1	2.6515	2.67924	-0.213448	0.00233719	0.126607	-0.302233	-0.303438	-0.213448	0.672242	1	-0.920871	-0.92551	-0.213448	0.211207	0.60268	0.618638	0.622072	-0.213448	0.397433	0.969838	2.34926	2.37581
105246306	Gm41609	predicted gene, 41609	-0.589014	-0.591988	-0.25626	0.445772	0.806888	-1.3957	-1.40533	-0.25626	0.0865449	0.289216	0.80669	0.813338	-0.25626	0.314427	1	1.89216	1.90349	-0.25626	0.0243132	0.255678	-0.313759	-0.315927	-0.25626	0.68785	1	2.00782	2.02548	-0.25626	0.019272	0.367954	0.496454	0.49816	-0.25626	0.513477	0.926663	-0.902772	-0.907915	-0.25626	0.249462	0.653087	1.39923	1.40608	-0.25626	0.0813601	0.531921	2.50427	2.52364
105246307	LOC105246307	uncharacterized LOC105246307	-2.75622	-2.78055	-0.279861	0.00110385	0.013737	-0.840614	-0.843927	-0.279861	0.230304	0.53986	-1.91561	-1.93662	-0.279861	0.0158189	0.493571	0.0416742	0.0418888	-0.279861	0.952116	1	1.02782	1.0424	-0.279861	0.177715	0.744609	1.43781	1.44497	-0.279861	0.0490114	0.554288	-0.79894	-0.802038	-0.279861	0.251825	0.689222	-1.7284	-1.73814	-0.279861	0.0213444	0.151479	0.929462	0.936103	-0.279861	0.196671	0.776157	0.638866	0.642927
105246445	Gm41734	predicted gene, 41734	0.64261	0.643181	2.04394	0.0348064	0.176951	0.113711	0.113831	2.04394	0.704275	0.95218	0.528899	0.52935	2.04394	0.0802958	0.881795	-0.226001	-0.226251	2.04394	0.453248	0.947825	-1.58082	-1.58285	2.04394	1.05412e-05	0.00121343	-0.0480514	-0.0481033	2.04394	0.872528	1	-0.11229	-0.11242	2.04394	0.708294	1	-0.938206	-0.939666	2.04394	0.00381496	0.0449409	0.825916	0.827246	2.04394	0.0101979	0.172695	-0.160341	-0.160524
105246452	Gm15345	predicted gene 15345	-1.31131	-1.31486	0.567516	0.0422576	0.201633	-1.03685	-1.03937	0.567516	0.100324	0.319138	-0.274454	-0.275489	0.567516	0.660526	1	0.0706174	0.0708466	0.567516	0.909081	1	-0.899635	-0.904832	0.567516	0.170206	0.728389	0.870818	0.872794	0.567516	0.162017	0.865951	-0.966237	-0.968521	0.567516	0.122804	0.472779	-2.21094	-2.21969	0.567516	0.00192866	0.0273448	1.24471	1.25117	0.567516	0.0607419	0.457826	-0.0954191	-0.095727
105246678	Gm41928	predicted gene, 41928	-2.91613	-2.95253	-1.01615	0.00248984	0.0252917	-1.87267	-1.8874	-1.01615	0.0308027	0.144271	-1.04346	-1.06513	-1.01615	0.234058	1	0.162233	0.164394	-1.01615	0.844155	1	1.54139	1.56909	-1.01615	0.0816299	0.53321	4.12389	4.21766	-1.01615	0.00019066	0.0265264	-1.71044	-1.72301	-1.01615	0.0445766	0.255806	-1.37474	-1.38344	-1.01615	0.0973416	0.392127	-0.335699	-0.339571	-1.01615	0.680254	1	2.41345	2.49465
105246702	Gm41949	predicted gene, 41949	-0.93917	-0.940194	1.83808	0.00809045	0.0626095	-0.500856	-0.501321	1.83808	0.138119	0.392517	-0.438314	-0.438874	1.83808	0.199663	1	-0.211285	-0.211532	1.83808	0.528668	0.99464	-0.250525	-0.250934	1.83808	0.463207	1	1.22575	1.22724	1.83808	0.000879315	0.0679646	-0.712141	-0.712853	1.83808	0.0388902	0.233716	-1.1897	-1.19113	1.83808	0.00116285	0.018418	0.477554	0.478276	1.83808	0.163675	0.72185	0.513611	0.514392
105246716	Gm28500	predicted gene 28500	-3.8	-4.0012	-1.60137	0.0141971	0.0941882	-1.94775	-1.98872	-1.60137	0.126332	0.369459	-1.85225	-2.01248	-1.60137	0.216659	1	2.14647	2.18927	-1.60137	0.0955736	0.505138	3.57751	3.77638	-1.60137	0.0199671	0.250847	6.67745	1.44269e+08	-1.60137	0.00125948	0.0869896	0.198716	0.200552	-1.60137	0.862728	1	-0.222493	-0.224823	-1.60137	0.847098	1	0.421209	0.425375	-1.60137	0.716027	1	6.87617	1.44269e+08
105246762	Gm42004	predicted gene, 42004	-0.485056	-0.486747	0.707697	0.35049	0.717826	-0.340344	-0.341476	0.707697	0.508514	0.822093	-0.144712	-0.145271	0.707697	0.781394	1	1.38671	1.39001	0.707697	0.0110606	0.161435	0.529503	0.531303	0.707697	0.310643	0.908619	0.479032	0.480701	0.707697	0.354637	1	1.04637	1.04854	0.707697	0.0459981	0.26109	0.0444466	0.0445559	0.707697	0.930428	1	1.00192	1.00398	0.707697	0.0560661	0.44437	1.5254	1.52924
105246847	LOC105246847	uncharacterized LOC105246847	-0.73734	-0.740027	0.142249	0.220364	0.559121	-0.226565	-0.227249	0.142249	0.699805	0.94971	-0.510775	-0.512778	0.142249	0.394795	1	-0.240004	-0.240853	0.142249	0.685814	1	-1.29523	-1.3052	0.142249	0.0459433	0.401127	1.0176	1.02172	0.142249	0.0965152	0.730932	-0.466568	-0.468102	0.142249	0.430887	0.869099	-2.03257	-2.04523	0.142249	0.00290411	0.0368521	1.566	1.57712	0.142249	0.017536	0.235669	0.551035	0.553613
105246904	Gm42102	predicted gene, 42102	-0.442455	-0.442629	3.45548	0.124132	0.400278	-0.394631	-0.394783	3.45548	0.16921	0.446493	-0.0478246	-0.047846	3.45548	0.868899	1	-0.490087	-0.490345	3.45548	0.0939839	0.500956	0.116966	0.117017	3.45548	0.685577	1	-0.222474	-0.222543	3.45548	0.434493	1	-0.884718	-0.885128	3.45548	0.00359694	0.0428861	-0.32549	-0.325613	3.45548	0.255075	0.65992	-0.559228	-0.559515	3.45548	0.0563238	0.445135	-1.10719	-1.10767
105246912	Gm42109	predicted gene, 42109	-1.07545	-1.08693	-1.34824	0.375626	0.744439	-1.85064	-1.87796	-1.34824	0.147446	0.409692	0.775196	0.791031	-1.34824	0.538728	1	-4.0371	-4.78375	-1.34824	0.0279892	0.275594	-1.03953	-1.06261	-1.34824	0.413806	0.989915	-0.125559	-0.126425	-1.34824	0.914469	1	-5.88774	-6.66171	-1.34824	0.0019581	0.0270433	-2.11498	-2.14954	-1.34824	0.102858	0.403809	-3.77276	-4.51217	-1.34824	0.0391834	0.370959	-6.0133	-6.78814
105246933	Gm42127	predicted gene, 42127	-2.08944	-2.10395	-0.445944	0.011207	0.0794182	-2.33036	-2.34824	-0.445944	0.00585781	0.0430411	0.24092	0.24429	-0.445944	0.75982	1	1.69819	1.71364	-0.445944	0.0357604	0.310238	0.532322	0.538286	-0.445944	0.489162	1	1.61949	1.62871	-0.445944	0.0390746	0.502435	-0.63217	-0.634595	-0.445944	0.387846	0.830733	-1.55712	-1.56566	-0.445944	0.0455468	0.246386	0.924951	0.931068	-0.445944	0.220221	0.807519	0.987316	0.994113
105246948	Gm42141	predicted gene, 42141	-2.7118	-2.9005	-1.22095	0.0297737	0.158459	-1.72689	-1.80326	-1.22095	0.123945	0.365118	-0.984909	-1.09724	-1.22095	0.452844	1	2.38345	2.47123	-1.22095	0.0381859	0.322661	4.98473	5.19826	-1.22095	0.000338104	0.0165954	-1.60331	-1.62438	-1.22095	0.103306	0.752761	0.656558	0.667963	-1.22095	0.496763	0.915036	2.27293	2.29775	-1.22095	0.0267367	0.175816	-1.61637	-1.62979	-1.22095	0.0997372	0.581164	-0.946751	-0.956417
105246959	Gm42151	predicted gene, 42151	-0.892234	-0.892345	5.05411	2.46892e-06	9.32547e-05	-1.10323	-1.10338	5.05411	6.33881e-08	3.5125e-06	0.210998	0.211036	5.05411	0.39455	1	0.108758	0.108778	5.05411	0.706454	1	0.0655425	0.065553	5.05411	0.830722	1	0.0316968	0.0316997	5.05411	0.922585	1	-0.994475	-0.994603	5.05411	3.88088e-07	2.4447e-05	-0.826692	-0.826792	5.05411	8.61685e-06	0.00038133	-0.167783	-0.167811	5.05411	0.527428	1	-0.962778	-0.962903
105246961	AB010352	cDNA sequence AB010352	-0.697759	-0.697999	3.92063	0.0110882	0.0788363	-0.689353	-0.68959	3.92063	0.0121432	0.0738716	-0.00840603	-0.00840958	3.92063	0.975807	1	0.91616	0.916453	3.92063	0.0012872	0.0418188	0.618115	0.618334	3.92063	0.0238382	0.274736	-0.122084	-0.122115	3.92063	0.652231	1	0.226807	0.226863	3.92063	0.399254	0.840986	-0.0796438	-0.0796652	3.92063	0.769389	1	0.306451	0.306528	3.92063	0.25405	0.850018	0.104724	0.104748
105247100	Gm42259	predicted gene, 42259	-1.57092	-1.57635	0.390326	0.0661718	0.268618	-2.904	-2.92184	0.390326	0.0030239	0.0258872	1.33308	1.34549	0.390326	0.142434	1	1.59603	1.60976	0.390326	0.0793638	0.466579	0.619826	0.622657	0.390326	0.455459	1	0.258462	0.259012	0.390326	0.74453	1	-1.30797	-1.31207	0.390326	0.116121	0.458769	-0.951089	-0.953692	0.390326	0.243418	0.646848	-0.356878	-0.358381	0.390326	0.661612	1	-1.04951	-1.05306
105247200	Gm42339	predicted gene, 42339	-2.36971	-2.37635	1.16734	2.50412e-05	0.000628924	-0.932455	-0.933901	1.16734	0.0426097	0.179008	-1.43725	-1.44245	1.16734	0.00443163	0.235057	0.0940138	0.0942056	1.16734	0.834264	1	0.980721	0.984793	1.16734	0.043929	0.391675	0.766018	0.767131	1.16734	0.0904268	0.710014	-0.838441	-0.839695	1.16734	0.0655945	0.32683	-1.38898	-1.39156	1.16734	0.0040455	0.0466523	0.550542	0.55186	1.16734	0.228154	0.818948	-0.0724232	-0.0725641
105247220	Gm42355	predicted gene, 42355	-1.29252	-1.2951	1.41594	0.0053378	0.045757	-0.43157	-0.432189	1.41594	0.315814	0.641371	-0.860945	-0.862911	1.41594	0.0562572	0.786666	0.037822	0.0378809	1.41594	0.93001	1	1.14395	1.14633	1.41594	0.0126367	0.191821	0.710835	0.711978	1.41594	0.101952	0.748053	-0.393748	-0.394308	1.41594	0.357478	0.80593	-0.148566	-0.148765	1.41594	0.726284	1	-0.245182	-0.245542	1.41594	0.567061	1	0.317087	0.31767
105247228	Gm42362	predicted gene, 42362	-0.894349	-0.89468	3.46857	0.000100491	0.00195187	-1.03218	-1.03258	3.46857	1.6156e-05	0.000380099	0.137827	0.137899	3.46857	0.584022	1	0.628256	0.628534	3.46857	0.00511242	0.100305	0.0481371	0.0481598	3.46857	0.851215	1	0.602654	0.602853	3.46857	0.00654725	0.219822	-0.40392	-0.404044	3.46857	0.0763066	0.360453	-0.846211	-0.84652	3.46857	0.000197226	0.00458431	0.442292	0.442475	3.46857	0.0521299	0.428444	0.198734	0.198809
105278	Cdk20	cyclin-dependent kinase 20	-0.547731	-0.547803	5.19322	0.00585914	0.0490095	-0.217007	-0.217033	5.19322	0.371452	0.69899	-0.330724	-0.33077	5.19322	0.132515	0.999493	-0.0121996	-0.0122013	5.19322	0.965595	1	0.493841	0.493907	5.19322	0.0144344	0.207941	-0.0196265	-0.0196286	5.19322	0.94519	1	-0.229207	-0.229234	5.19322	0.339195	0.788548	-0.05389	-0.053896	5.19322	0.848325	1	-0.175317	-0.175338	5.19322	0.488756	1	-0.248834	-0.248862
105298	Epdr1	ependymin related protein 1 (zebrafish)	0.129759	0.129764	6.95645	0.828938	1	0.113733	0.113737	6.95645	0.871066	1	0.0160265	0.016027	6.95645	0.991082	1	-0.300311	-0.300323	6.95645	0.126357	0.576735	0.0223471	0.0223479	6.95645	0.987388	1	-0.348101	-0.348113	6.95645	0.0409453	0.511195	-0.186579	-0.186586	6.95645	0.609206	0.975126	0.152106	0.152112	6.95645	0.75551	1	-0.338685	-0.338698	6.95645	0.0525069	0.430267	-0.53468	-0.534699
105348	Golm1	golgi membrane protein 1	0.476308	0.476333	6.39843	0.000803293	0.0107285	0.416194	0.416217	6.39843	0.0059276	0.0434549	0.0601138	0.0601166	6.39843	0.955921	1	-0.123329	-0.123336	6.39843	0.842259	1	-0.023789	-0.0237901	6.39843	0.985852	1	0.0438338	0.0438366	6.39843	0.970662	1	0.292864	0.292881	6.39843	0.147637	0.523114	0.452519	0.452543	6.39843	0.00179939	0.0258724	-0.159654	-0.159662	6.39843	0.721768	1	0.336698	0.336718
105377	Slf1	SMC5-SMC6 complex localization factor 1	-0.153754	-0.153765	5.99933	0.641927	0.937484	-0.0205762	-0.0205776	5.99933	0.967723	1	-0.133177	-0.133187	5.99933	0.708982	1	0.475571	0.4756	5.99933	0.00425423	0.0904365	-0.242212	-0.242233	5.99933	0.317348	0.914184	-0.132335	-0.132344	5.99933	0.715241	1	0.454995	0.455023	5.99933	0.00686988	0.068802	-0.395965	-0.395998	5.99933	0.0271092	0.176937	0.85096	0.85102	5.99933	2.27258e-07	0.000141772	0.32266	0.322679
105439	Slain1	SLAIN motif family, member 1	0.584629	0.584656	6.677	2.14443e-06	8.2612e-05	0.438657	0.438678	6.677	0.000963551	0.0108527	0.145972	0.145978	6.677	0.839471	1	-0.00367555	-0.0036757	6.677	0.999188	1	-0.278075	-0.278086	6.677	0.184753	0.752194	-0.310697	-0.310712	6.677	0.0843479	0.693834	0.434982	0.435002	6.677	0.00111612	0.017736	0.306554	0.306569	6.677	0.0940383	0.384809	0.128427	0.128433	6.677	0.889005	1	0.124285	0.12429
105445	Dock9	dedicator of cytokinesis 9	-0.263794	-0.263893	3.28401	0.304145	0.666633	-0.0617273	-0.0617488	3.28401	0.813362	0.997125	-0.202067	-0.202144	3.28401	0.43549	1	-0.413612	-0.413782	3.28401	0.103209	0.524151	-0.530064	-0.530326	3.28401	0.0371302	0.355853	1.35609	1.35685	3.28401	3.58355e-06	0.00154005	-0.47534	-0.475531	3.28401	0.0594725	0.307589	-0.793859	-0.794219	3.28401	0.00209661	0.0290863	0.318519	0.318689	3.28401	0.215898	0.800792	0.880752	0.881323
105500046	Gm30731	predicted gene, 30731	-1.04673	-1.05079	0.0123928	0.149314	0.448383	-3.32596	-3.36093	0.0123928	0.000327367	0.00461104	2.27924	2.31013	0.0123928	0.00796535	0.340801	2.47162	2.50349	0.0123928	0.0044562	0.0926649	-1.58119	-1.59664	0.0123928	0.0447276	0.396064	-0.0876571	-0.08788	0.0123928	0.899597	1	-0.85434	-0.857436	0.0123928	0.233205	0.662157	-2.62792	-2.64743	0.0123928	0.0018443	0.0264395	1.77358	1.79	0.0123928	0.0257682	0.294756	-0.941997	-0.945316
105501	Abhd4	abhydrolase domain containing 4	-0.970151	-0.970161	8.61838	2.56235e-14	1.83531e-11	-1.17046	-1.17047	8.61838	1.83589e-16	2.73109e-13	0.200308	0.200311	8.61838	0.703313	1	0.0471584	0.0471592	8.61838	0.99815	1	0.0341058	0.0341063	8.61838	0.998951	1	-0.155502	-0.155503	8.61838	0.909372	1	-1.1233	-1.12331	8.61838	5.32766e-16	7.92552e-13	-0.936045	-0.936055	8.61838	6.40743e-14	5.38753e-11	-0.187255	-0.187258	8.61838	0.780436	1	-1.2788	-1.27882
105504	Exoc5	exocyst complex component 5	0.533241	0.533261	6.89621	0.00126751	0.0152062	0.394621	0.394637	6.89621	0.0305876	0.143576	0.138619	0.138624	6.89621	0.680676	1	0.22202	0.222027	6.89621	0.384925	0.896572	-0.542553	-0.542574	6.89621	0.00101223	0.036251	0.0109118	0.0109122	6.89621	0.981252	1	0.616641	0.616664	6.89621	0.000145441	0.00349837	-0.00931247	-0.00931288	6.89621	0.984016	1	0.625953	0.625977	6.89621	0.000115497	0.0088635	0.627553	0.627576
105522	Ankrd28	ankyrin repeat domain 28	0.26858	0.268614	5.40808	0.231067	0.572194	0.659889	0.659963	5.40808	6.51976e-06	0.000179099	-0.391309	-0.391349	5.40808	0.0198056	0.533454	0.0956897	0.0956978	5.40808	0.867428	1	0.198904	0.198925	5.40808	0.510036	1	-0.173439	-0.173462	5.40808	0.615534	1	0.755579	0.75566	5.40808	3.50771e-07	2.26302e-05	0.467484	0.467539	5.40808	0.00248347	0.0329862	0.288095	0.288121	5.40808	0.170555	0.73493	0.58214	0.582198
105653	Phyhip	phytanoyl-CoA hydroxylase interacting protein	1.24533	1.25243	-0.147213	0.102529	0.35439	0.619308	0.623583	-0.147213	0.407808	0.734663	0.626026	0.628844	-0.147213	0.397466	1	0.620301	0.623095	-0.147213	0.401715	0.911079	-0.171324	-0.171947	-0.147213	0.813562	1	1.42842	1.44879	-0.147213	0.0806345	0.682456	1.23961	1.24668	-0.147213	0.104005	0.432718	1.07401	1.08048	-0.147213	0.154896	0.510137	0.165599	0.166198	-0.147213	0.819679	1	2.66803	2.69547
105663	Thtpa	thiamine triphosphatase	0.473174	0.473192	7.02165	0.00016251	0.00290461	0.662369	0.662393	7.02165	5.23654e-08	2.96978e-06	-0.189195	-0.189201	7.02165	0.670666	1	-0.131382	-0.131386	7.02165	0.89477	1	0.0874381	0.087441	7.02165	0.965116	1	-0.361057	-0.361072	7.02165	0.0158471	0.332746	0.530987	0.531007	7.02165	1.27975e-05	0.000471412	0.560612	0.560633	7.02165	3.50569e-06	0.000181274	-0.0296251	-0.029626	7.02165	0.994356	1	0.16993	0.169935
105689	Mycbp2	MYC binding protein 2	-0.190147	-0.190157	6.1953	0.559207	0.888697	-0.309634	-0.309651	6.1953	0.114055	0.346319	0.119487	0.119494	6.1953	0.817329	1	-0.0218319	-0.0218332	6.1953	0.98053	1	-0.156092	-0.156101	6.1953	0.697561	1	0.606206	0.606243	6.1953	2.38642e-05	0.0059168	-0.331465	-0.331484	6.1953	0.0731701	0.350343	-0.346239	-0.346258	6.1953	0.0529725	0.271515	0.0147735	0.0147745	6.1953	0.987028	1	0.27474	0.274759
105727	Slc38a1	solute carrier family 38, member 1	-0.0738293	-0.0738326	6.79835	0.95388	1	0.117397	0.117402	6.79835	0.882287	1	-0.191226	-0.191235	6.79835	0.607038	1	0.402701	0.402715	6.79835	0.00650468	0.115513	0.397113	0.397129	6.79835	0.00793862	0.144291	0.240573	0.240585	6.79835	0.353889	1	0.520098	0.520117	6.79835	8.60044e-05	0.00230047	0.323284	0.323296	6.79835	0.0695565	0.322733	0.196814	0.196821	6.79835	0.581414	1	0.760671	0.760702
105734727	Gm27021	predicted gene, 27021	0.575342	0.575784	2.64151	0.0397381	0.193771	0.645467	0.645953	2.64151	0.021551	0.111823	-0.0701254	-0.0701688	2.64151	0.801389	1	-0.51186	-0.512226	2.64151	0.0670599	0.429144	0.240679	0.240819	2.64151	0.385155	0.971055	0.0638121	0.0638758	2.64151	0.820474	1	0.133608	0.133726	2.64151	0.633974	0.986466	0.816021	0.816602	2.64151	0.00439338	0.0494958	-0.682413	-0.682876	2.64151	0.0156879	0.220807	0.19742	0.197602
105833	Ccdc65	coiled-coil domain containing 65	-0.141176	-0.141225	3.76113	0.578455	0.90127	0.24835	0.248428	3.76113	0.316622	0.642243	-0.389526	-0.389653	3.76113	0.107614	0.956975	0.122502	0.122535	3.76113	0.63036	1	0.217828	0.217903	3.76113	0.384516	0.970564	0.300424	0.300537	3.76113	0.221968	0.95388	0.370852	0.370963	3.76113	0.12461	0.476435	0.0766529	0.0766778	3.76113	0.764856	1	0.294199	0.294285	3.76113	0.230923	0.823232	0.671277	0.6715
105837	Mtbp	Mdm2, transformed 3T3 cell double minute p53 binding protein	-0.172251	-0.172319	3.42588	0.506482	0.850973	-0.698454	-0.698786	3.42588	0.00636426	0.0459248	0.526203	0.526468	3.42588	0.0395301	0.718921	0.426673	0.426895	3.42588	0.0953588	0.504416	0.307213	0.307327	3.42588	0.229514	0.817265	0.0598002	0.059823	3.42588	0.819009	1	-0.271781	-0.271891	3.42588	0.288328	0.734854	0.134962	0.135008	3.42588	0.603213	0.946333	-0.406743	-0.406899	3.42588	0.107718	0.59792	-0.21198	-0.212068
105841	Dennd3	DENN/MADD domain containing 3	0.763593	0.764303	2.40366	0.00892162	0.0671513	0.965268	0.966111	2.40366	0.0013701	0.0142915	-0.201675	-0.201808	2.40366	0.474533	1	-0.640174	-0.640668	2.40366	0.0254855	0.262028	-0.275873	-0.27609	2.40366	0.329474	0.926523	-0.29054	-0.290854	2.40366	0.307706	1	0.325094	0.325442	2.40366	0.253681	0.691169	0.48772	0.488213	2.40366	0.0871252	0.367278	-0.162626	-0.162771	2.40366	0.567379	1	0.0345544	0.034588
105853	Mal2	mal, T cell differentiation protein 2	0.445921	0.446424	1.92832	0.215475	0.55193	-0.665102	-0.666198	1.92832	0.0747394	0.261727	1.11102	1.11262	1.92832	0.0041487	0.225927	0.723689	0.724862	1.92832	0.0533651	0.381171	0.422469	0.422818	1.92832	0.2359	0.82351	0.352837	0.353355	1.92832	0.329871	1	0.0585864	0.0586635	1.92832	0.869011	1	0.868389	0.869243	1.92832	0.0187206	0.138818	-0.809803	-0.810579	1.92832	0.0275922	0.306938	0.411423	0.412019
105855	Nckap1l	NCK associated protein 1 like	0.93077	0.931094	3.53485	0.00136949	0.0160769	0.520939	0.521146	3.53485	0.0600858	0.226422	0.409831	0.409948	3.53485	0.135869	1	-0.760956	-0.761286	3.53485	0.00781359	0.13031	-0.73733	-0.737567	3.53485	0.00873924	0.153087	-0.149547	-0.149615	3.53485	0.591076	1	-0.240017	-0.24014	3.53485	0.390595	0.832245	0.19344	0.193527	3.53485	0.48624	0.874671	-0.433457	-0.433667	3.53485	0.120797	0.628656	-0.389564	-0.389755
105859	Csdc2	cold shock domain containing C2, RNA binding	-0.330073	-0.330076	9.30168	0.0243649	0.138094	-0.388736	-0.388739	9.30168	0.00135442	0.0141737	0.0586629	0.0586634	9.30168	0.997036	1	0.0893086	0.0893093	9.30168	0.990411	1	0.167794	0.167795	9.30168	0.86774	1	-0.361321	-0.361323	9.30168	0.00558621	0.200814	-0.299428	-0.29943	9.30168	0.0826473	0.378389	-0.162279	-0.16228	9.30168	0.887263	1	-0.137148	-0.137149	9.30168	0.948126	1	-0.660749	-0.660753
105988	Espl1	extra spindle pole bodies 1, separase	0.515931	0.516104	4.11865	0.0786328	0.300115	0.590537	0.590731	4.11865	0.0449601	0.185115	-0.0746062	-0.0746265	4.11865	0.797237	1	0.253572	0.253634	4.11865	0.38006	0.894736	0.690406	0.690559	4.11865	0.0190023	0.244003	-0.47332	-0.473479	4.11865	0.105846	0.757012	0.844109	0.844365	4.11865	0.00538359	0.0575253	1.20634	1.20666	4.11865	0.000159543	0.0038833	-0.362227	-0.362299	4.11865	0.20674	0.790145	0.37079	0.370885
106014	Fam19a5	family with sequence similarity 19, member A5	-0.3061	-0.306123	5.73009	0.140359	0.433195	-0.367051	-0.367079	5.73009	0.0501196	0.199437	0.060951	0.0609562	5.73009	0.890286	1	-0.337975	-0.338008	5.73009	0.0856432	0.481003	-0.318172	-0.318202	5.73009	0.11762	0.628358	-0.0915122	-0.0915182	5.73009	0.824656	1	-0.705026	-0.705088	5.73009	1.25442e-05	0.000463849	-0.624272	-0.624325	5.73009	0.000104729	0.00277826	-0.0807543	-0.0807629	5.73009	0.844782	1	-0.796538	-0.796606
106039	Gga1	golgi associated, gamma adaptin ear containing, ARF binding protein 1	0.617929	0.618004	5.37511	0.000124966	0.00232824	0.524845	0.524911	5.37511	0.00143112	0.0147535	0.0930842	0.0930936	5.37511	0.818566	1	-0.0191939	-0.0191959	5.37511	0.968225	1	0.078229	0.0782365	5.37511	0.85534	1	-0.556643	-0.556712	5.37511	0.000625257	0.0557228	0.505651	0.505715	5.37511	0.00233411	0.030728	0.696158	0.696241	5.37511	1.51611e-05	0.000591339	-0.190507	-0.190526	5.37511	0.502998	1	-0.0509917	-0.050997
106042	Prickle1	prickle planar cell polarity protein 1	-0.213087	-0.21318	3.25945	0.404993	0.770124	-0.310463	-0.310604	3.25945	0.219391	0.522834	0.0973761	0.097424	3.25945	0.708245	1	-0.143024	-0.1431	3.25945	0.581344	1	-0.369369	-0.369569	3.25945	0.143486	0.682794	-0.335141	-0.335264	3.25945	0.1808	0.896997	-0.453486	-0.453705	3.25945	0.0687284	0.337078	-0.582455	-0.582749	3.25945	0.0192168	0.141198	0.128969	0.129045	3.25945	0.619758	1	-0.788628	-0.788969
106052	Fbxo4	F-box protein 4	0.00433747	0.00433825	4.43501	0.988738	1	-0.0378595	-0.0378662	4.43501	0.900672	1	0.042197	0.0422045	4.43501	0.88852	1	-0.560535	-0.56066	4.43501	0.00327477	0.077715	-0.439965	-0.440056	4.43501	0.0266061	0.293087	0.207123	0.207163	4.43501	0.403952	1	-0.598395	-0.598526	4.43501	0.00152765	0.0226559	-0.435628	-0.435718	4.43501	0.0281173	0.181095	-0.162767	-0.162808	4.43501	0.535064	1	-0.391272	-0.391363
106064	AW549877	expressed sequence AW549877	-0.673187	-0.673227	6.36475	1.84272e-05	0.000488169	-0.523704	-0.523733	6.36475	0.00111094	0.0121176	-0.149484	-0.149494	6.36475	0.660536	1	0.623608	0.623641	6.36475	7.1594e-05	0.00528457	0.274049	0.274067	6.36475	0.217507	0.801759	0.00595457	0.00595483	6.36475	0.991412	1	0.0999041	0.0999086	6.36475	0.817235	1	-0.399139	-0.39916	6.36475	0.0235846	0.16243	0.499043	0.499068	6.36475	0.00208784	0.0665186	0.105859	0.105863
106068	Slc45a4	solute carrier family 45, member 4	0.666778	0.666898	4.79369	0.000120947	0.00226647	0.831459	0.8316	4.79369	2.73071e-06	8.55903e-05	-0.164681	-0.164703	4.79369	0.561485	1	-0.194808	-0.194834	4.79369	0.461013	0.953599	-0.0595461	-0.0595545	4.79369	0.866949	1	-0.10297	-0.102992	4.79369	0.750038	1	0.636651	0.636766	4.79369	0.000243304	0.00534687	0.607232	0.607343	4.79369	0.000480632	0.00937935	0.029419	0.0294231	4.79369	0.936366	1	0.533682	0.533774
106143	Cggbp1	CGG triplet repeat binding protein 1	-0.00575389	-0.00575405	7.27744	0.994984	1	-0.229143	-0.22915	7.27744	0.385708	0.714244	0.223389	0.223396	7.27744	0.410453	1	0.463451	0.463463	7.27744	0.00229639	0.0615948	-0.323807	-0.323817	7.27744	0.0867034	0.547244	0.0427468	0.042748	7.27744	0.95922	1	0.234308	0.234314	7.27744	0.364069	0.812583	-0.329561	-0.329571	7.27744	0.0768238	0.341832	0.563869	0.563885	7.27744	9.55796e-05	0.00763807	0.277055	0.277062
106248	Qtrt2	queuine tRNA-ribosyltransferase accessory subunit 2	-0.643657	-0.643882	3.82478	0.00207325	0.0219817	-0.476445	-0.476601	3.82478	0.0253271	0.125346	-0.167212	-0.167281	3.82478	0.502793	1	0.362496	0.36262	3.82478	0.103708	0.525393	0.591123	0.591332	3.82478	0.00487647	0.10559	-0.0999017	-0.0999285	3.82478	0.702098	1	-0.113949	-0.113982	3.82478	0.659769	0.995888	-0.0525345	-0.0525494	3.82478	0.84351	1	-0.0614142	-0.0614322	3.82478	0.81647	1	-0.21385	-0.21391
106338	Nsun3	NOL1/NOP2/Sun domain family member 3	-0.354327	-0.354388	4.47415	0.0912857	0.329145	-0.475377	-0.475462	4.47415	0.0146407	0.0846515	0.12105	0.121074	4.47415	0.662168	1	-0.138834	-0.138865	4.47415	0.608239	1	-0.587961	-0.588101	4.47415	0.00202384	0.057473	0.0724197	0.0724311	4.47415	0.807214	1	-0.614211	-0.614327	4.47415	0.00108364	0.0174042	-0.942288	-0.942489	4.47415	1.90033e-06	0.000104109	0.328077	0.328162	4.47415	0.128806	0.648017	-0.541791	-0.541896
106344	Rfc4	replication factor C (activator 1) 4	0.424414	0.424504	4.50315	0.0739791	0.287401	0.642508	0.642635	4.50315	0.00604111	0.0440366	-0.218094	-0.218131	4.50315	0.379939	1	-0.0747787	-0.0747908	4.50315	0.770007	1	-0.0175211	-0.0175246	4.50315	0.945653	1	0.213051	0.213109	4.50315	0.393392	1	0.56773	0.567844	4.50315	0.0151641	0.121359	0.406893	0.406979	4.50315	0.0876233	0.368684	0.160837	0.160865	4.50315	0.522979	1	0.780781	0.780953
106393	Srl	sarcalumenin	0.46577	0.465877	4.32803	0.015227	0.0992962	0.511915	0.512031	4.32803	0.00653428	0.0468719	-0.046145	-0.0461538	4.32803	0.883045	1	-0.070105	-0.0701185	4.32803	0.819409	1	-0.274737	-0.274795	4.32803	0.225538	0.812037	-0.0563607	-0.0563755	4.32803	0.855063	1	0.44181	0.441912	4.32803	0.022974	0.162566	0.191034	0.191082	4.32803	0.455523	0.848296	0.250777	0.25083	4.32803	0.284115	0.880896	0.385449	0.385537
106581	Fam234a	family with sequence similarity 234, member A	-0.225466	-0.225475	6.89877	0.397314	0.763024	-0.1168	-0.116804	6.89877	0.814662	0.997705	-0.108666	-0.10867	6.89877	0.834821	1	-0.325634	-0.325648	6.89877	0.0868085	0.482761	0.205813	0.20582	6.89877	0.481395	1	-0.137668	-0.137672	6.89877	0.752505	1	-0.442434	-0.442452	6.89877	0.00499434	0.0543838	-0.0196537	-0.0196543	6.89877	0.980651	1	-0.42278	-0.422798	6.89877	0.00866047	0.155366	-0.580102	-0.580124
106582	Nrm	nurim (nuclear envelope membrane protein)	0.612383	0.612525	4.27845	0.00101632	0.0128883	0.522581	0.522706	4.27845	0.0058746	0.0431317	0.089802	0.0898193	4.27845	0.760532	1	-0.439421	-0.439522	4.27845	0.0257412	0.262879	-0.0197386	-0.0197423	4.27845	0.949602	1	0.0473538	0.0473673	4.27845	0.87559	1	0.0831605	0.0831835	4.27845	0.777005	1	0.592644	0.592783	4.27845	0.0014918	0.0224165	-0.509484	-0.509599	4.27845	0.00758044	0.144574	0.130514	0.130551
106585	Ankrd12	ankyrin repeat domain 12	0.0991807	0.0991868	6.04179	0.838182	1	-0.0433336	-0.0433364	6.04179	0.943802	1	0.142514	0.142523	6.04179	0.710215	1	0.136821	0.136829	6.04179	0.730032	1	-0.321196	-0.321218	6.04179	0.101	0.585327	0.398145	0.398174	6.04179	0.0202586	0.374235	0.0934872	0.093493	6.04179	0.852421	1	-0.222016	-0.222031	6.04179	0.40175	0.80767	0.315503	0.315524	6.04179	0.111511	0.608086	0.491632	0.491667
106639	Vmac	vimentin-type intermediate filament associated coiled-coil protein	-0.142498	-0.142511	5.64609	0.631793	0.932437	-0.17222	-0.172235	5.64609	0.53465	0.843017	0.0297213	0.029724	5.64609	0.934267	1	-0.060517	-0.0605228	5.64609	0.861738	1	-0.210914	-0.210934	5.64609	0.406009	0.982999	-0.28903	-0.289052	5.64609	0.187427	0.907838	-0.232737	-0.232758	5.64609	0.338141	0.787583	-0.353412	-0.353445	5.64609	0.0783604	0.345039	0.120675	0.120688	5.64609	0.697183	1	-0.521767	-0.52181
106794	Dhx57	DEAH (Asp-Glu-Ala-Asp/His) box polypeptide 57	0.128574	0.128595	4.93091	0.670824	0.951987	0.188198	0.188228	4.93091	0.47875	0.797568	-0.059624	-0.0596329	4.93091	0.861765	1	0.345525	0.345571	4.93091	0.0892361	0.488877	0.143898	0.143919	4.93091	0.622918	1	-0.120214	-0.120234	4.93091	0.69696	1	0.533723	0.533798	4.93091	0.00267448	0.0342756	0.272473	0.272514	4.93091	0.227485	0.626419	0.261251	0.261284	4.93091	0.256307	0.851484	0.413509	0.413565
106795	Tcf19	transcription factor 19	0.577143	0.577236	4.93751	0.00248153	0.0252315	0.394438	0.394505	4.93751	0.0544722	0.211237	0.182706	0.182731	4.93751	0.47438	1	-0.0721904	-0.0722013	4.93751	0.803496	1	0.301537	0.301573	4.93751	0.172703	0.734044	-0.266522	-0.266569	4.93751	0.246705	0.976207	0.322247	0.322303	4.93751	0.138107	0.50441	0.878681	0.878808	4.93751	6.33542e-06	0.000292412	-0.556433	-0.556505	4.93751	0.0035454	0.0926547	0.0557257	0.0557347
106869	Tnfaip8	tumor necrosis factor, alpha-induced protein 8	-0.194817	-0.194828	6.20328	0.481916	0.832189	-0.418938	-0.418962	6.20328	0.0188734	0.101415	0.22412	0.224134	6.20328	0.37589	1	0.066722	0.0667264	6.20328	0.872742	1	-0.569142	-0.569182	6.20328	0.000570209	0.0243966	-0.0823802	-0.0823842	6.20328	0.839746	1	-0.352216	-0.352236	6.20328	0.0680408	0.334712	-0.763959	-0.76401	6.20328	3.67554e-06	0.000188045	0.411744	0.411774	6.20328	0.0224851	0.275024	-0.434596	-0.43462
106931	Kctd1	potassium channel tetramerisation domain containing 1	-0.633144	-0.633272	4.42076	0.00125082	0.0150526	-0.542011	-0.542118	4.42076	0.00623482	0.0451254	-0.0911321	-0.0911545	4.42076	0.737631	1	0.183171	0.183211	4.42076	0.465652	0.955991	0.217648	0.217698	4.42076	0.369388	0.96051	0.19204	0.192073	4.42076	0.441521	1	-0.358841	-0.358907	4.42076	0.0937546	0.408722	-0.415495	-0.415574	4.42076	0.0445036	0.243054	0.0566545	0.0566671	4.42076	0.839911	1	-0.166801	-0.166834
106947	Slc39a3	solute carrier family 39 (zinc transporter), member 3	0.0244523	0.0244535	6.56104	0.978556	1	-0.0975793	-0.0975842	6.56104	0.873614	1	0.122032	0.122038	6.56104	0.81162	1	-0.0242939	-0.0242951	6.56104	0.978304	1	0.106222	0.106227	6.56104	0.853905	1	-0.32508	-0.325094	6.56104	0.0832192	0.690719	-0.121873	-0.121879	6.56104	0.812976	1	0.130674	0.13068	6.56104	0.788065	1	-0.252547	-0.252559	6.56104	0.289536	0.883102	-0.446953	-0.446973
106957	Slc39a6	solute carrier family 39 (metal ion transporter), member 6	0.218964	0.21897	7.25729	0.457046	0.815689	0.0147892	0.0147896	7.25729	0.99268	1	0.204174	0.20418	7.25729	0.531161	1	0.405153	0.405164	7.25729	0.00715659	0.122479	-0.0257585	-0.0257592	7.25729	0.986842	1	-0.00255673	-0.00255682	7.25729	0.998761	1	0.419942	0.419954	7.25729	0.00436461	0.0493609	0.193205	0.193211	7.25729	0.58613	0.935709	0.226737	0.226743	7.25729	0.418177	0.983673	0.417385	0.417397
107022	Gramd3	GRAM domain containing 3	-0.803669	-0.803737	5.57286	2.09061e-06	8.09104e-05	-1.19975	-1.19987	5.57286	8.7037e-10	9.56368e-08	0.396085	0.396136	5.57286	0.0345682	0.670068	0.299712	0.299751	5.57286	0.16058	0.639508	0.231231	0.231254	5.57286	0.347987	0.94122	0.146419	0.146429	5.57286	0.644309	1	-0.900042	-0.900121	5.57286	2.34189e-07	1.61749e-05	-0.572438	-0.572482	5.57286	0.000617601	0.0113319	-0.327604	-0.327639	5.57286	0.107302	0.596641	-0.753622	-0.753692
107029	Me2	malic enzyme 2, NAD(+)-dependent, mitochondrial	0.109175	0.109183	5.94698	0.799174	1	0.27771	0.27773	5.94698	0.205667	0.504204	-0.168536	-0.168547	5.94698	0.603974	1	0.0127213	0.0127222	5.94698	0.98272	1	0.0987945	0.0988013	5.94698	0.825875	1	0.163883	0.163896	5.94698	0.621069	1	0.290432	0.290452	5.94698	0.171118	0.564141	0.207969	0.207984	5.94698	0.451368	0.845004	0.0824625	0.082468	5.94698	0.865078	1	0.454315	0.454349
107094	Rrp12	ribosomal RNA processing 12 homolog (S. cerevisiae)	0.531836	0.531972	4.30203	0.0188402	0.115888	0.720461	0.720633	4.30203	0.0014342	0.0147542	-0.188624	-0.188662	4.30203	0.446138	1	-0.302078	-0.30214	4.30203	0.204098	0.708627	0.145706	0.145735	4.30203	0.561803	1	-0.180037	-0.180089	4.30203	0.468881	1	0.418383	0.418494	4.30203	0.0697797	0.340174	0.677542	0.677707	4.30203	0.00262386	0.0341472	-0.259159	-0.259213	4.30203	0.282994	0.880194	0.238346	0.238405
107182	Btaf1	B-TFIID TATA-box binding protein associated factor 1	-0.232761	-0.232805	4.69397	0.342796	0.709606	-0.178228	-0.178262	4.69397	0.529357	0.839049	-0.0545326	-0.0545437	4.69397	0.888319	1	0.322613	0.322671	4.69397	0.115707	0.553052	0.677619	0.677731	4.69397	4.9925e-05	0.0039528	-0.0478544	-0.0478628	4.69397	0.905895	1	0.144385	0.144409	4.69397	0.648049	0.991818	0.444858	0.444926	4.69397	0.0122814	0.103146	-0.300473	-0.300516	4.69397	0.157112	0.708581	0.0965307	0.0965466
107272	Psat1	phosphoserine aminotransferase 1	-0.320428	-0.320431	8.80919	0.0409648	0.197364	-0.357744	-0.357748	8.80919	0.00830553	0.0559849	0.0373159	0.0373164	8.80919	0.998153	1	0.0403805	0.040381	8.80919	0.997906	1	0.324911	0.324914	8.80919	0.0343732	0.339764	-0.0520451	-0.0520455	8.80919	0.996731	1	-0.317364	-0.317367	8.80919	0.0460779	0.26109	0.00448236	0.0044824	8.80919	0.999838	1	-0.321846	-0.321849	8.80919	0.0387836	0.369294	-0.369409	-0.369412
107321	Lpxn	leupaxin	1.77683	1.78089	1.24652	8.05812e-05	0.00164038	1.19331	1.19653	1.24652	0.00431132	0.0339712	0.583528	0.584356	1.24652	0.134174	0.99996	-0.0235102	-0.0235518	1.24652	0.951413	1	-0.394131	-0.394654	1.24652	0.306546	0.905445	0.0651375	0.0653991	1.24652	0.871175	1	1.1698	1.17298	1.24652	0.00501195	0.0545141	1.3827	1.38623	1.24652	0.0011909	0.0187902	-0.212907	-0.213254	1.24652	0.580748	1	1.23493	1.23838
107371	Exoc6	exocyst complex component 6	0.776315	0.77654	3.98073	0.000418367	0.00631107	0.721521	0.721734	3.98073	0.000977641	0.0109731	0.0547935	0.0548058	3.98073	0.832401	1	-0.304656	-0.304734	3.98073	0.192273	0.690248	-0.373177	-0.37327	3.98073	0.100998	0.585327	-0.0843089	-0.0843398	3.98073	0.742163	1	0.416865	0.417001	3.98073	0.0637991	0.320387	0.403138	0.40327	3.98073	0.0744934	0.335889	0.0137271	0.0137307	3.98073	0.957857	1	0.332556	0.332661
107373	Fam111a	family with sequence similarity 111, member A	0.813399	0.813678	3.75057	0.00133097	0.0157526	0.2049	0.204986	3.75057	0.426062	0.751455	0.608499	0.608692	3.75057	0.0145236	0.479303	0.647787	0.647991	3.75057	0.0092615	0.144792	-0.0387393	-0.0387489	3.75057	0.881503	1	0.404532	0.40474	3.75057	0.110054	0.765386	0.852687	0.852976	3.75057	0.000814008	0.0140554	0.774659	0.774929	3.75057	0.00209897	0.0290982	0.0780279	0.0780473	3.75057	0.763292	1	1.25722	1.25772
107392	Brms1	breast cancer metastasis-suppressor 1	0.0353247	0.0353295	5.14871	0.918422	1	0.1157	0.115715	5.14871	0.706253	0.953321	-0.0803749	-0.0803853	5.14871	0.804686	1	0.25069	0.250719	5.14871	0.284916	0.810532	0.355473	0.355515	5.14871	0.0790143	0.526501	0.174221	0.174246	5.14871	0.520726	1	0.36639	0.366434	5.14871	0.0666336	0.330502	0.390798	0.390844	5.14871	0.0450324	0.244886	-0.024408	-0.0244104	5.14871	0.944603	1	0.54061	0.540679
107581	Col16a1	collagen, type XVI, alpha 1	1.26557	1.26569	5.77426	1.0071e-12	4.6372e-10	1.18918	1.18929	5.77426	4.47256e-12	1.20132e-09	0.0763933	0.0763979	5.77426	0.924916	1	-0.532516	-0.532556	5.77426	0.00018276	0.0104878	-0.051973	-0.0519761	5.77426	0.956692	1	-0.178028	-0.178052	5.77426	0.619159	1	0.65666	0.656735	5.77426	3.21585e-06	0.000146333	1.2136	1.21371	5.77426	2.70517e-12	1.0899e-09	-0.556936	-0.556978	5.77426	7.94296e-05	0.00656449	0.478632	0.478683
107607	Nod1	nucleotide-binding oligomerization domain containing 1	-0.176967	-0.1771	2.46204	0.518603	0.85949	-0.382818	-0.383126	2.46204	0.161091	0.432945	0.205851	0.206027	2.46204	0.45552	1	-0.222821	-0.223044	2.46204	0.42129	0.926675	-0.174936	-0.175086	2.46204	0.525795	1	-0.172404	-0.172519	2.46204	0.527828	1	-0.605639	-0.60617	2.46204	0.0281359	0.187627	-0.351903	-0.352186	2.46204	0.197168	0.581522	-0.253736	-0.253984	2.46204	0.358707	0.942008	-0.778043	-0.778689
107702	Rnh1	ribonuclease/angiogenin inhibitor 1	0.311874	0.311885	7.12398	0.0948644	0.337036	0.408639	0.408653	7.12398	0.00601869	0.0439394	-0.0967652	-0.096768	7.12398	0.916534	1	-0.254986	-0.254993	7.12398	0.284545	0.810399	0.0774951	0.0774973	7.12398	0.945133	1	-0.135183	-0.135188	7.12398	0.825736	1	0.153654	0.153659	7.12398	0.762987	1	0.389369	0.389382	7.12398	0.0111975	0.0962862	-0.235715	-0.235723	7.12398	0.375149	0.954893	0.0184705	0.0184711
107747	Aldh1l1	aldehyde dehydrogenase 1 family, member L1	-0.30095	-0.300953	8.6338	0.0837078	0.311732	-0.438686	-0.438691	8.6338	0.00014032	0.00234541	0.137736	0.137738	8.6338	0.935123	1	-0.364384	-0.36439	8.6338	0.00626324	0.113212	0.199031	0.199033	8.6338	0.690491	1	-0.208169	-0.208171	8.6338	0.631718	1	-0.80307	-0.80308	8.6338	8.90982e-12	2.46153e-09	-0.101919	-0.10192	8.6338	0.979789	1	-0.701151	-0.70116	8.6338	4.18124e-10	5.39073e-07	-1.01124	-1.01125
107766	Haao	3-hydroxyanthranilate 3,4-dioxygenase	-0.46659	-0.470721	-0.605548	0.558229	0.888697	0.844778	0.84952	-0.605548	0.286986	0.607958	-1.31137	-1.32024	-0.605548	0.109795	0.96146	-0.481267	-0.483606	-0.605548	0.53963	0.998256	1.06963	1.07743	-0.605548	0.18712	0.756802	4.04486	4.22525	-0.605548	0.000337142	0.0392481	0.363511	0.365914	-0.605548	0.643733	0.990636	0.603037	0.606707	-0.605548	0.44401	0.841525	-0.239527	-0.240793	-0.605548	0.759445	1	4.40837	4.59116
107771	Bmyc	brain expressed myelocytomatosis oncogene	0.438837	0.438888	5.31165	0.0165594	0.105516	0.507229	0.507287	5.31165	0.00394897	0.0317543	-0.0683926	-0.0683993	5.31165	0.850045	1	-0.335593	-0.335629	5.31165	0.0993311	0.512661	-0.198654	-0.198675	5.31165	0.451196	1	-0.321823	-0.321862	5.31165	0.121037	0.784954	0.171636	0.171658	5.31165	0.542052	0.945085	0.240183	0.240213	5.31165	0.316994	0.728877	-0.0685471	-0.0685552	5.31165	0.84854	1	-0.150187	-0.150204
107817	Jmjd6	jumonji domain containing 6	0.192512	0.192534	5.40741	0.519401	0.859872	0.338175	0.338212	5.40741	0.0738559	0.259899	-0.145664	-0.145678	5.40741	0.697154	1	-0.0112657	-0.0112668	5.40741	0.986016	1	0.285561	0.285589	5.40741	0.182127	0.748378	-0.0888885	-0.088899	5.40741	0.859228	1	0.32691	0.326945	5.40741	0.0912799	0.401835	0.478073	0.478123	5.40741	0.00259749	0.0338823	-0.151163	-0.151177	5.40741	0.679971	1	0.238021	0.238046
107895	Mgat5	mannoside acetylglucosaminyltransferase 5	-0.618896	-0.618965	5.07117	0.00066238	0.00916949	-0.815201	-0.815299	5.07117	1.0272e-05	0.000262071	0.196305	0.196334	5.07117	0.440888	1	-0.237953	-0.237994	5.07117	0.318426	0.84848	0.0874468	0.0874584	5.07117	0.773662	1	0.499501	0.499554	5.07117	0.00737874	0.23925	-1.05315	-1.05329	5.07117	1.33345e-07	9.80516e-06	-0.531449	-0.531507	5.07117	0.00396064	0.0460979	-0.521704	-0.521786	5.07117	0.00524904	0.116948	-0.553653	-0.553738
107934	Celsr3	cadherin, EGF LAG seven-pass G-type receptor 3	0.16019	0.160227	4.32572	0.556406	0.887889	0.0598159	0.0598302	4.32572	0.850246	1	0.100374	0.100396	4.32572	0.737606	1	0.248005	0.248058	4.32572	0.291542	0.816517	0.274157	0.274211	4.32572	0.225736	0.812037	0.198927	0.198979	4.32572	0.43388	1	0.307821	0.307888	4.32572	0.155058	0.535254	0.434347	0.434438	4.32572	0.0240724	0.164384	-0.126526	-0.126549	4.32572	0.662873	1	0.506748	0.506867
107939	Pom121	nuclear pore membrane protein 121	0.0684641	0.0684724	5.41809	0.850775	1	0.266541	0.266571	5.41809	0.241589	0.554551	-0.198077	-0.198099	5.41809	0.454104	1	0.11562	0.115632	5.41809	0.72566	1	0.545351	0.545404	5.41809	0.00159037	0.0481318	-0.0936943	-0.0937055	5.41809	0.786615	1	0.382162	0.382203	5.41809	0.0460343	0.26109	0.613815	0.613877	5.41809	0.000305033	0.00646116	-0.231653	-0.231674	5.41809	0.344659	0.931336	0.288467	0.288498
107971	Frs3	fibroblast growth factor receptor substrate 3	0.554078	0.554203	4.41729	0.0214858	0.126565	0.649339	0.649481	4.41729	0.0070546	0.0497009	-0.0952612	-0.0952778	4.41729	0.710453	1	-0.478131	-0.478229	4.41729	0.0485313	0.362513	-0.0533391	-0.0533496	4.41729	0.836016	1	-0.398464	-0.398557	4.41729	0.102743	0.751209	0.171208	0.171252	4.41729	0.501061	0.918224	0.500739	0.500853	4.41729	0.0381134	0.220107	-0.329531	-0.329601	4.41729	0.182514	0.753893	-0.227255	-0.227305
107986	Ddb2	damage specific DNA binding protein 2	-0.732474	-0.732827	2.9949	0.039976	0.194197	-0.986604	-0.98713	2.9949	0.00706956	0.04977	0.25413	0.254303	2.9949	0.469051	1	0.314172	0.314381	2.9949	0.37083	0.889017	0.0699986	0.0700392	2.9949	0.840117	1	0.677198	0.677519	2.9949	0.0561744	0.591416	-0.672432	-0.672749	2.9949	0.0577975	0.302038	-0.662476	-0.662788	2.9949	0.0613016	0.298919	-0.00995645	-0.0099612	2.9949	0.977048	1	0.00476547	0.00477043
107995	Cdc20	cell division cycle 20	0.551775	0.551809	6.44786	1.90343e-05	0.000502875	0.645994	0.646032	6.44786	5.01649e-07	1.98799e-05	-0.0942186	-0.0942233	6.44786	0.93514	1	0.0867047	0.0867087	6.44786	0.94586	1	0.525649	0.525671	6.44786	4.98862e-05	0.0039528	-0.0591919	-0.0591962	6.44786	0.971696	1	0.732698	0.732741	6.44786	2.23689e-08	2.21842e-06	1.07742	1.07748	6.44786	2.08219e-12	8.75381e-10	-0.344725	-0.344739	6.44786	0.0361656	0.355209	0.673506	0.673545
108000	Cenpf	centromere protein F	0.391231	0.391275	5.45194	0.0382793	0.189138	0.202305	0.202328	5.45194	0.442383	0.766462	0.188927	0.188946	5.45194	0.48843	1	0.152509	0.152525	5.45194	0.61302	1	0.471081	0.47112	5.45194	0.00758461	0.139694	0.0751985	0.0752082	5.45194	0.837126	1	0.354814	0.354853	5.45194	0.0713914	0.345039	0.862313	0.862394	5.45194	7.01883e-07	4.66451e-05	-0.507499	-0.507541	5.45194	0.00334076	0.0903054	0.430012	0.430062
108012	Ap1s2	adaptor-related protein complex 1, sigma 2 subunit	0.260086	0.260093	7.34874	0.259263	0.609913	0.00557159	0.00557175	7.34874	0.98906	1	0.254514	0.254521	7.34874	0.275259	1	0.320591	0.320599	7.34874	0.120461	0.565026	-0.551092	-0.551108	7.34874	0.00125723	0.0416328	-0.122264	-0.122268	7.34874	0.711259	1	0.326162	0.32617	7.34874	0.11084	0.447938	-0.291006	-0.291015	7.34874	0.179978	0.553617	0.617168	0.617185	7.34874	0.000253556	0.0151447	0.203898	0.203903
108013	Celf4	CUGBP, Elav-like family member 4	0.268456	0.268466	6.93303	0.223173	0.562922	0.43124	0.431255	6.93303	0.000730502	0.00871979	-0.162784	-0.162789	6.93303	0.809965	1	-0.079426	-0.0794285	6.93303	0.977242	1	-0.232298	-0.232306	6.93303	0.42668	0.996091	0.235585	0.235595	6.93303	0.406132	1	0.351814	0.351826	6.93303	0.0192203	0.143786	0.0361578	0.0361592	6.93303	0.994331	1	0.315656	0.315667	6.93303	0.0652004	0.474184	0.587399	0.587422
108030	Lin7a	lin-7 homolog A (C. elegans)	0.954906	0.955526	3.05402	0.00253102	0.0255868	1.07471	1.07539	3.05402	0.000810032	0.00949982	-0.119808	-0.119862	3.05402	0.683167	1	-0.0246375	-0.0246489	3.05402	0.932909	1	0.104815	0.104862	3.05402	0.720574	1	0.471951	0.472447	3.05402	0.123085	0.790809	1.05008	1.05074	3.05402	0.000998006	0.0163841	1.05972	1.06039	3.05402	0.000914503	0.0153521	-0.00964432	-0.00964975	3.05402	0.97366	1	1.52203	1.52319
108037	Shmt2	serine hydroxymethyltransferase 2 (mitochondrial)	0.311599	0.311615	6.59432	0.0964802	0.34024	0.337113	0.337129	6.59432	0.0518953	0.204525	-0.0255133	-0.0255144	6.59432	0.987104	1	-0.245449	-0.245461	6.59432	0.327257	0.854555	0.123961	0.123966	6.59432	0.854607	1	-0.278848	-0.278862	6.59432	0.189526	0.909715	0.0916635	0.0916683	6.59432	0.922008	1	0.43556	0.435581	6.59432	0.00253652	0.0334838	-0.343897	-0.343912	6.59432	0.0435347	0.390507	-0.187184	-0.187193
108052	Slc14a1	solute carrier family 14 (urea transporter), member 1	2.64169	2.64664	1.73168	3.25259e-06	0.000118459	2.36024	2.36499	1.73168	1.51414e-05	0.000361057	0.28145	0.281654	1.73168	0.510085	1	-0.78583	-0.786661	1.73168	0.074857	0.454004	-1.52689	-1.52867	1.73168	0.00136902	0.0440523	0.31189	0.313299	1.73168	0.508145	1	1.57441	1.57833	1.73168	0.00140324	0.0211514	1.11479	1.11798	1.73168	0.0182938	0.136482	0.459612	0.460351	1.73168	0.296531	0.889492	1.8863	1.89163
108071	Grm5	glutamate receptor, metabotropic 5	0.126833	0.126894	3.04725	0.628932	0.930527	0.181146	0.181231	3.04725	0.48797	0.804711	-0.0543127	-0.054337	3.04725	0.836855	1	0.0446636	0.0446833	3.04725	0.865365	1	-0.665729	-0.666119	3.04725	0.0100545	0.166638	0.946964	0.947638	3.04725	0.000512346	0.0492345	0.22581	0.225915	3.04725	0.384408	0.828492	-0.538896	-0.539225	3.04725	0.0356628	0.2113	0.764706	0.76514	3.04725	0.00335965	0.0903647	1.17277	1.17355
108100	Baiap2	brain-specific angiogenesis inhibitor 1-associated protein 2	0.384535	0.384692	3.54827	0.0888611	0.323612	0.64757	0.647813	3.54827	0.00271097	0.0239861	-0.263035	-0.263121	3.54827	0.268019	1	-0.117795	-0.117832	3.54827	0.643505	1	-0.269279	-0.269384	3.54827	0.256376	0.852232	-0.0258786	-0.02589	3.54827	0.920648	1	0.529775	0.529982	3.54827	0.0151189	0.121208	0.115256	0.115308	3.54827	0.650408	0.969397	0.414519	0.414674	3.54827	0.0643218	0.470825	0.503897	0.504092
108101	Fermt3	fermitin family member 3	1.16327	1.16372	3.55669	1.82698e-05	0.000486536	1.10724	1.10767	3.55669	3.71428e-05	0.000774186	0.0560313	0.0560455	3.55669	0.82866	1	-1.02811	-1.0285	3.55669	0.00010926	0.00723621	-0.668965	-0.669177	3.55669	0.00672493	0.130314	-0.0531418	-0.0531712	3.55669	0.838557	1	0.0791323	0.0791752	3.55669	0.761413	1	0.494307	0.49454	3.55669	0.0464168	0.248727	-0.415175	-0.415365	3.55669	0.0975296	0.575565	0.0259905	0.026004
108116	Slco3a1	solute carrier organic anion transporter family, member 3a1	0.833018	0.833373	3.32388	0.00194678	0.0208812	0.840029	0.840386	3.32388	0.00179813	0.0176249	-0.00701119	-0.00701337	3.32388	0.979015	1	-0.867532	-0.867905	3.32388	0.00140646	0.0442268	-0.301651	-0.301756	3.32388	0.250274	0.845054	0.507602	0.507941	3.32388	0.055604	0.588719	-0.0275034	-0.0275189	3.32388	0.918364	1	0.531367	0.531617	3.32388	0.0419795	0.234908	-0.55887	-0.559136	3.32388	0.0333011	0.339131	0.480099	0.480422
108143	Taf9	TATA-box binding protein associated factor 9	0.380336	0.380342	8.07716	0.0135554	0.0912135	0.4386	0.438607	8.07716	0.00185752	0.018097	-0.0582641	-0.058265	8.07716	0.969133	1	-0.0577845	-0.0577854	8.07716	0.969569	1	-0.202103	-0.202106	8.07716	0.5535	1	-0.118597	-0.118599	8.07716	0.879773	1	0.380816	0.380822	8.07716	0.0133327	0.11108	0.178233	0.178236	8.07716	0.670834	0.980076	0.202583	0.202586	8.07716	0.551136	1	0.262219	0.262223
108154	Adamts6	a disintegrin-like and metallopeptidase (reprolysin type) with thrombospondin type 1 motif, 6	-1.52134	-1.5221	3.23057	5.27865e-06	0.000176922	-1.18116	-1.18168	3.23057	0.000151505	0.00249357	-0.340176	-0.340422	3.23057	0.239818	1	-0.0474095	-0.0474387	3.23057	0.869019	1	0.84451	0.84503	3.23057	0.00482546	0.104951	0.447834	0.447983	3.23057	0.109481	0.764354	-1.22857	-1.22912	3.23057	8.80416e-05	0.00233895	-0.676827	-0.67707	3.23057	0.0176615	0.133108	-0.551743	-0.552047	3.23057	0.0542395	0.436876	-0.780736	-0.781133
108155	Ogt	O-linked N-acetylglucosamine (GlcNAc) transferase (UDP-N-acetylglucosamine:polypeptide-N-acetylglucosaminyl transferase)	-0.831886	-0.831905	7.64032	7.1272e-11	1.40551e-08	-0.792004	-0.792021	7.64032	2.57436e-10	3.40997e-08	-0.0398823	-0.0398835	7.64032	0.993046	1	0.493857	0.493869	7.64032	4.6329e-05	0.0039998	0.412155	0.412165	7.64032	0.00178868	0.052411	0.331323	0.331329	7.64032	0.0398268	0.505911	-0.298147	-0.298152	7.64032	0.108568	0.443326	-0.419731	-0.41974	7.64032	0.00125375	0.0194906	0.121585	0.121587	7.64032	0.925778	1	0.0331766	0.0331772
108156	Mthfd1	methylenetetrahydrofolate dehydrogenase (NADP+ dependent), methenyltetrahydrofolate cyclohydrolase, formyltetrahydrofolate synthase	-0.408393	-0.408411	6.6126	0.010723	0.0769477	-0.34302	-0.343036	6.6126	0.0561185	0.215375	-0.0653722	-0.0653755	6.6126	0.931537	1	-0.136005	-0.136012	6.6126	0.770709	1	0.191468	0.191477	6.6126	0.55503	1	-0.192382	-0.192389	6.6126	0.553546	1	-0.479025	-0.479048	6.6126	0.00131396	0.0201033	-0.216925	-0.216934	6.6126	0.442338	0.841483	-0.262101	-0.262114	6.6126	0.253426	0.849537	-0.671407	-0.671437
108161	Fam50b	family with sequence similarity 50, member B	-0.167466	-0.167675	2.06256	0.688425	0.96162	0.760075	0.760767	2.06256	0.0710624	0.253781	-0.927541	-0.928442	2.06256	0.0311554	0.654761	0.0700441	0.0700912	2.06256	0.864327	1	-0.28946	-0.289885	2.06256	0.494372	1	0.915269	0.916775	2.06256	0.0365686	0.485724	0.830119	0.830858	2.06256	0.0498618	0.274879	-0.456926	-0.45756	2.06256	0.278373	0.687574	1.28705	1.28842	2.06256	0.00401853	0.100101	1.74539	1.74763
108167326	Gm2788	predicted gene 2788	-3.69434	-3.7057	0.163712	0.000997241	0.0127298	-3.60755	-3.61803	0.163712	0.00118092	0.0127231	-0.0867915	-0.0876727	0.163712	0.924647	1	2.66652	2.67616	0.163712	0.00857645	0.137643	1.21553	1.22239	0.163712	0.198146	0.77436	2.69788	2.70302	0.163712	0.00844545	0.254403	-0.941027	-0.941872	0.163712	0.3089	0.756724	-2.47882	-2.48331	0.163712	0.0151134	0.11949	1.53779	1.54144	0.163712	0.102557	0.587465	1.75686	1.76115
108167434	Gm45988	predicted gene, 45988	0.884063	0.888237	0.933563	0.183139	0.504017	1.77229	1.77873	0.933563	0.0107956	0.0679167	-0.888224	-0.89049	0.933563	0.169731	1	0.309169	0.309682	0.933563	0.619069	1	0.589658	0.591329	0.933563	0.356521	0.950292	-1.42107	-1.42679	0.933563	0.0359461	0.483423	2.08146	2.08841	0.933563	0.00350544	0.0420614	1.47372	1.47957	0.933563	0.0300503	0.189051	0.607734	0.608843	0.933563	0.332972	0.920931	0.660387	0.66162
108167437	Gm44812	predicted gene 44812	0.21945	0.220189	0.0902336	0.74936	0.991023	-1.66085	-1.67252	0.0902336	0.0283537	0.135928	1.8803	1.89271	0.0902336	0.0147654	0.482344	2.43638	2.45024	0.0902336	0.00250722	0.0645501	-2.23347	-2.25042	0.0902336	0.00545628	0.113433	0.360798	0.362245	0.0902336	0.604423	1	0.775533	0.777719	0.0902336	0.263675	0.703243	-2.01402	-2.03023	0.0902336	0.0106444	0.092852	2.78955	2.80795	0.0902336	0.00092514	0.0379857	1.13633	1.13996
108167452	Gm45996	predicted gene, 45996	-2.16334	-2.17566	0.292806	0.00601189	0.0498987	-0.939378	-0.942646	0.292806	0.18155	0.46726	-1.22396	-1.23302	0.292806	0.102617	0.947861	0.669981	0.672521	0.292806	0.337533	0.864119	1.60445	1.61511	0.292806	0.034791	0.342087	0.833818	0.836589	0.292806	0.230705	0.961557	-0.269397	-0.270125	0.292806	0.690875	1	-0.558883	-0.560554	0.292806	0.414782	0.820334	0.289486	0.290429	0.292806	0.672333	1	0.56442	0.566464
108167456	Gm45998	predicted gene, 45998	-0.29837	-0.298707	1.77561	0.475497	0.828369	-0.225466	-0.225715	1.77561	0.588903	0.882154	-0.0729037	-0.0729927	1.77561	0.862182	1	-0.632682	-0.633621	1.77561	0.140936	0.602333	-1.06198	-1.06396	1.77561	0.0179394	0.236974	-0.034219	-0.034251	1.77561	0.934257	1	-0.858148	-0.859335	1.77561	0.0474108	0.26607	-1.36035	-1.36267	1.77561	0.00307689	0.0382662	0.5022	0.50333	1.77561	0.249253	0.845371	-0.892367	-0.893586
108167518	LOC108167518	uncharacterized LOC108167518	-1.87992	-1.88502	1.02925	0.00130208	0.015515	-0.837379	-0.838869	1.02925	0.1075	0.334075	-1.04254	-1.04615	1.02925	0.0566218	0.788344	0.316596	0.317263	1.02925	0.536649	0.998256	0.962683	0.966104	1.02925	0.0765919	0.519905	1.16358	1.16593	1.02925	0.0295233	0.441913	-0.520783	-0.521606	1.02925	0.305618	0.75339	-0.917235	-0.918915	1.02925	0.0792584	0.34749	0.396452	0.397309	1.02925	0.439733	0.996324	0.642794	0.644322
108167536	Gm46042	predicted gene, 46042	-0.623572	-0.623892	2.93165	0.0234761	0.134719	-0.85545	-0.855929	2.93165	0.00268648	0.0238539	0.231878	0.232037	2.93165	0.403102	1	0.358123	0.358358	2.93165	0.193943	0.692771	0.170262	0.170362	2.93165	0.537696	1	0.740966	0.741365	2.93165	0.0078737	0.245993	-0.497327	-0.497571	2.93165	0.0677868	0.33408	-0.45331	-0.45353	2.93165	0.095902	0.38919	-0.044017	-0.0440408	2.93165	0.87339	1	0.243639	0.243794
108167558	Gm46056	predicted gene, 46056	-2.04619	-2.09709	-2.1807	0.141244	0.435231	-6.36738	-9.56491	-2.1807	0.00299704	0.0257054	4.32119	7.46782	-2.1807	0.0398212	0.720138	6.15569	9.35078	-2.1807	0.00399986	0.0873003	-2.52274	-2.89694	-2.1807	0.141749	0.679374	4.54487	4.94887	-2.1807	0.00985667	0.271536	-0.211686	-0.214135	-2.1807	0.866246	1	-4.56892	-4.99403	-2.1807	0.00967358	0.0869319	4.35724	4.77989	-2.1807	0.0131632	0.198412	4.33319	4.73473
108167591	Gm46076	60S ribosomal protein L27a pseudogene	-1.22725	-1.2292	1.3114	0.0110233	0.0786016	-1.37346	-1.37579	1.3114	0.00525716	0.039823	0.146219	0.146588	1.3114	0.753646	1	0.724131	0.725629	1.3114	0.122174	0.568716	0.00613603	0.00617077	1.3114	0.989345	1	1.25496	1.25699	1.3114	0.00945032	0.26517	-0.649334	-0.650162	1.3114	0.154027	0.53353	-1.22111	-1.22303	1.3114	0.0111006	0.0957088	0.571776	0.57287	1.3114	0.214984	0.800153	0.60563	0.606831
108167592	LOC108167592	uncharacterized LOC108167592	-0.857497	-0.858436	1.73164	0.0240479	0.137225	-1.22696	-1.22851	1.73164	0.00205482	0.0195273	0.36946	0.370073	1.73164	0.32724	1	0.434604	0.435312	1.73164	0.247952	0.765632	-0.652477	-0.653669	1.73164	0.0875662	0.550355	0.538786	0.539309	1.73164	0.145441	0.837359	-0.792353	-0.793197	1.73164	0.0350421	0.217973	-1.50997	-1.5121	1.73164	0.000264011	0.00578223	0.71762	0.718908	1.73164	0.059784	0.45572	-0.253567	-0.253888
108167619	LOC108167619	nucleoside diphosphate kinase, mitochondrial pseudogene	-2.00085	-2.00422	1.49146	7.27013e-05	0.00150371	-1.80763	-1.81044	1.49146	0.00021737	0.00331262	-0.193213	-0.19378	1.49146	0.661965	1	1.1075	1.10961	1.49146	0.0142223	0.187956	0.599966	0.601513	1.49146	0.174396	0.737291	1.54043	1.54256	1.49146	0.00099541	0.0737557	-0.700131	-0.70083	1.49146	0.0994799	0.421576	-1.40088	-1.4027	1.49146	0.00223788	0.0305638	0.700748	0.701873	1.49146	0.104991	0.592289	0.840298	0.841734
108167626	Gm46093	predicted gene, 46093	-0.977651	-0.978481	2.11623	0.00286617	0.0283379	-1.11921	-1.12022	2.11623	0.00083508	0.00971697	0.14156	0.141734	2.11623	0.649486	1	0.583526	0.584145	2.11623	0.0635807	0.418654	-0.713738	-0.714829	2.11623	0.028106	0.30264	1.09359	1.09456	2.11623	0.00101142	0.074656	-0.535685	-0.53607	2.11623	0.0815107	0.375497	-1.69139	-1.69331	2.11623	5.572e-06	0.000265411	1.1557	1.15724	2.11623	0.000688151	0.0311586	0.557906	0.558487
108167630	Gm46095	predicted gene, 46095	-1.59173	-1.60684	-0.988764	0.152649	0.453189	-5.47044	-5.83814	-0.988764	0.000911167	0.0103959	3.87871	4.2313	-0.988764	0.0135105	0.464199	4.87547	5.23938	-0.988764	0.00247684	0.0642217	0.909693	0.920367	-0.988764	0.405848	0.982929	1.60614	1.6214	-0.988764	0.147813	0.84105	-0.594968	-0.598764	-0.988764	0.571736	0.959959	-0.682037	-0.686477	-0.988764	0.51775	0.895286	0.0870688	0.0877132	-0.988764	0.934312	1	1.01117	1.02263
108167680	Gm46129	predicted gene, 46129	-1.72328	-1.72746	1.24417	0.000858661	0.0112887	-0.796711	-0.798064	1.24417	0.0843677	0.283903	-0.926566	-0.929391	1.24417	0.0551834	0.780545	0.757592	0.758895	1.24417	0.100708	0.516936	1.41162	1.41536	1.24417	0.00485937	0.105353	1.90783	1.91289	1.24417	0.000324024	0.0387501	-0.0391188	-0.0391688	1.24417	0.929933	1	-0.311653	-0.312093	1.24417	0.48692	0.874956	0.272534	0.272924	1.24417	0.543843	1	1.86871	1.87372
108167692	Gm46136	predicted gene, 46136	-0.886548	-0.887552	1.86655	0.00361174	0.0339065	-0.410383	-0.410772	1.86655	0.153752	0.419973	-0.476165	-0.47678	1.86655	0.103582	0.95027	-0.46053	-0.461121	1.86655	0.113352	0.546798	0.162669	0.162904	1.86655	0.576963	1	0.805289	0.806172	1.86655	0.00713107	0.233742	-0.870913	-0.871893	1.86655	0.00395036	0.0456641	-0.723878	-0.724649	1.86655	0.0142542	0.114955	-0.147035	-0.147245	1.86655	0.612579	1	-0.0656239	-0.0657215
108167700	Gm46139	predicted gene, 46139	-0.881794	-0.883179	1.26547	0.0484449	0.219872	-1.17936	-1.18144	1.26547	0.0106136	0.0670555	0.297564	0.298261	1.26547	0.502262	1	0.341237	0.342027	1.26547	0.439832	0.941342	-0.869137	-0.87165	1.26547	0.0589789	0.463265	0.386387	0.386886	1.26547	0.37049	1	-0.838121	-0.839413	1.26547	0.05862	0.304827	-1.75093	-1.75483	1.26547	0.000446199	0.00883218	0.91281	0.915416	1.26547	0.0469903	0.404928	-0.451734	-0.452527
108167784	Gm46202	predicted gene, 46202	-3.50637	-3.55476	-0.394236	0.0015383	0.0175201	-0.990437	-0.994945	-0.394236	0.269794	0.588504	-2.51593	-2.55981	-0.394236	0.0156689	0.493046	1.36088	1.36641	-0.394236	0.136177	0.594492	2.67773	2.72255	-0.394236	0.0105774	0.172041	3.02217	3.05624	-0.394236	0.00466517	0.184837	0.370438	0.371466	-0.394236	0.669907	1	-0.828636	-0.832204	-0.394236	0.349908	0.760493	1.19907	1.20367	-0.394236	0.182982	0.754377	3.39261	3.42771
108167791	Gm46208	predicted gene, 46208	-1.3837	-1.399	-1.30406	0.213236	0.548739	-0.756598	-0.763265	-1.30406	0.481347	0.799242	-0.627103	-0.635736	-1.30406	0.570307	1	-0.589106	-0.597125	-1.30406	0.591317	1	-3.39116	-3.63533	-1.30406	0.0182673	0.239366	0.772413	0.77904	-1.30406	0.470163	1	-1.3457	-1.36039	-1.30406	0.222656	0.646025	-4.77486	-5.03433	-1.30406	0.00163397	0.02405	3.42916	3.67394	-1.30406	0.016764	0.229358	-0.573291	-0.58135
108167801	LOC108167801	uncharacterized LOC108167801	-2.14497	-2.15207	-0.186906	0.0457729	0.211771	-3.73784	-3.76411	-0.186906	0.00243881	0.0221532	1.59287	1.61204	-0.186906	0.138765	1	3.70722	3.73351	-0.186906	0.00255985	0.0650626	-0.510086	-0.513901	-0.186906	0.613279	1	1.85685	1.86231	-0.186906	0.0787839	0.679103	-0.0306108	-0.0306038	-0.186906	0.975613	1	-2.65505	-2.66597	-0.186906	0.0175933	0.132646	2.62444	2.63536	-0.186906	0.0185179	0.243452	1.82624	1.8317
108167806	Gm46221	predicted gene, 46221	-0.501793	-0.502201	2.6266	0.0508979	0.226487	-0.24453	-0.244711	2.6266	0.347503	0.675388	-0.257263	-0.25749	2.6266	0.326407	1	-0.154724	-0.154856	2.6266	0.557719	1	0.302504	0.302767	2.6266	0.245935	0.83918	-0.550064	-0.550375	2.6266	0.0300746	0.446296	-0.399254	-0.399566	2.6266	0.120893	0.468997	-0.199288	-0.199433	2.6266	0.44517	0.841525	-0.199966	-0.200133	2.6266	0.446356	0.999436	-0.949318	-0.949941
108167812	Gm46226	predicted gene, 46226	-0.0792958	-0.0793262	3.79091	0.761915	0.995558	0.725665	0.725874	3.79091	0.00403045	0.0322291	-0.804961	-0.8052	3.79091	0.00172665	0.135695	-0.490563	-0.490693	3.79091	0.0502528	0.369661	0.462933	0.463087	3.79091	0.0666692	0.489224	0.269104	0.269214	3.79091	0.29521	1	0.235102	0.235181	3.79091	0.360758	0.809522	0.383637	0.383761	3.79091	0.128476	0.458779	-0.148535	-0.148579	3.79091	0.567295	1	0.504207	0.504395
108167819	Gm46232	predicted gene, 46232	-0.500144	-0.500754	1.68453	0.243669	0.590355	-0.389417	-0.389872	1.68453	0.36117	0.688747	-0.110726	-0.110882	1.68453	0.796317	1	-0.973028	-0.974883	1.68453	0.0314106	0.291903	-0.148565	-0.148793	1.68453	0.729996	1	0.219367	0.219609	1.68453	0.604384	1	-1.36245	-1.36476	1.68453	0.0034788	0.0417866	-0.648709	-0.649547	1.68453	0.133559	0.468172	-0.713737	-0.715209	1.68453	0.108984	0.601325	-1.14308	-1.14515
108167844	Gm9884	predicted gene 9884	-1.8636	-1.87001	0.42381	0.00481495	0.0423448	-1.45185	-1.45606	0.42381	0.0215832	0.111867	-0.41175	-0.413945	0.42381	0.503974	1	-0.148615	-0.149314	0.42381	0.806136	1	0.307992	0.309714	0.42381	0.61554	1	0.793928	0.7957	0.42381	0.182905	0.90111	-1.60047	-1.60538	0.42381	0.0121217	0.10428	-1.55561	-1.56029	0.42381	0.0144915	0.116142	-0.0448572	-0.0450824	0.42381	0.940762	1	-0.806541	-0.809676
108167845	Gm46249	predicted gene, 46249	-2.36135	-2.37611	-0.0528081	0.00469981	0.0415781	-1.79767	-1.80646	-0.0528081	0.0223848	0.114554	-0.563677	-0.569649	-0.0528081	0.466655	1	0.850982	0.856485	-0.0528081	0.257666	0.776013	0.41389	0.418658	-0.0528081	0.590678	1	0.574889	0.576624	-0.0528081	0.423713	1	-0.946691	-0.949978	-0.0528081	0.195532	0.604553	-1.94746	-1.95745	-0.0528081	0.0142677	0.115016	1.00077	1.00748	-0.0528081	0.184832	0.75834	-0.371802	-0.373353
108167848	LOC108167848	zinc finger protein 717-like	-0.857708	-0.857872	4.54688	1.48552e-05	0.000412303	-1.19516	-1.19542	4.54688	6.20313e-08	3.4472e-06	0.337455	0.337551	4.54688	0.122141	0.984675	0.91493	0.915146	4.54688	6.4857e-06	0.000995452	0.414237	0.414328	4.54688	0.0447285	0.396064	0.190109	0.190138	4.54688	0.449996	1	-0.280234	-0.280277	4.54688	0.217361	0.639128	-0.443472	-0.443544	4.54688	0.0277165	0.179869	0.163238	0.163267	4.54688	0.528381	1	-0.0901248	-0.0901396
108167863	Gm46259	predicted gene, 46259	0.486093	0.490385	-1.1107	0.634418	0.934261	-0.614915	-0.623013	-1.1107	0.557106	0.860258	1.10101	1.1134	-1.1107	0.29935	1	1.56725	1.58262	-1.1107	0.144631	0.608411	-1.54098	-1.5613	-1.1107	0.155629	0.702315	3.11028	3.23108	-1.1107	0.0159821	0.333985	0.952338	0.959603	-1.1107	0.353787	0.80285	-1.05489	-1.07091	-1.1107	0.322122	0.733963	2.00723	2.03052	-1.1107	0.0691997	0.488592	4.06262	4.19068
108167878	Gm46265	predicted gene, 46265	-1.78376	-1.79141	0.314161	0.00279456	0.0277434	-1.08156	-1.08505	0.314161	0.0499382	0.199099	-0.702199	-0.706364	0.314161	0.207587	1	0.513066	0.515045	0.314161	0.341065	0.867636	1.07202	1.07768	0.314161	0.0576867	0.457589	1.36795	1.3729	0.314161	0.0157217	0.332746	-0.568498	-0.570006	0.314161	0.283479	0.728962	-0.711746	-0.713736	0.314161	0.18307	0.557805	0.143248	0.14373	0.314161	0.786902	1	0.799449	0.80289
108167895	Gm46277	predicted gene, 46277	-1.49633	-1.50097	0.808819	0.00585837	0.0490095	-0.844951	-0.846982	0.808819	0.0954697	0.309035	-0.651377	-0.653993	0.808819	0.207201	1	0.943656	0.945855	0.808819	0.0647079	0.423911	0.519357	0.521518	0.808819	0.312421	0.909247	0.891247	0.893438	0.808819	0.0794528	0.680486	0.0987053	0.0988738	0.808819	0.83929	1	-0.976971	-0.979456	0.808819	0.056329	0.282287	1.07568	1.07833	0.808819	0.0372707	0.361065	0.989952	0.992311
108167918	Gm46290	predicted gene, 46290	1.58211	1.58841	0.727532	0.0175958	0.110303	2.10589	2.11316	0.727532	0.00247632	0.0223888	-0.523783	-0.524747	0.727532	0.390016	1	-0.728549	-0.729995	0.727532	0.236564	0.751028	-0.673672	-0.675582	0.727532	0.278836	0.875434	-0.71755	-0.721246	0.727532	0.261379	0.99048	1.37734	1.38316	0.727532	0.0360717	0.222304	0.908434	0.912827	0.727532	0.157241	0.514521	0.468906	0.470334	0.727532	0.448819	0.999436	0.65979	0.661915
108167930	LOC108167930	uncharacterized LOC108167930	-2.05706	-2.06391	0.458428	0.00494017	0.0431712	-2.33537	-2.34412	0.458428	0.00199817	0.0190922	0.278307	0.280208	0.458428	0.68639	1	1.20297	1.20915	0.458428	0.0846906	0.479178	-0.204472	-0.205811	0.458428	0.764945	1	0.948283	0.950294	0.458428	0.149871	0.847473	-1.1324	-1.13497	0.458428	0.0895597	0.398202	-2.26153	-2.26972	0.458428	0.00244875	0.0326596	1.12913	1.13475	0.458428	0.101833	0.586093	-0.184115	-0.184672
108167989	Gm46340	predicted gene, 46340	1.90665	1.90991	1.35971	0.00249007	0.0252917	-1.21533	-1.22114	1.35971	0.0556351	0.214281	3.12198	3.13105	1.35971	3.1149e-05	0.0088587	2.77357	2.78231	1.35971	0.000120145	0.00774492	-1.84654	-1.84961	1.35971	0.00334047	0.0818059	0.0118939	0.0119324	1.35971	0.983622	1	1.55824	1.56117	1.35971	0.0105255	0.0944432	0.0601125	0.060302	1.35971	0.917372	1	1.49812	1.50087	1.35971	0.0138615	0.205967	1.57013	1.5731
108167997	Gm46347	predicted gene, 46347	-1.87527	-1.87945	0.727163	0.012022	0.0836609	-2.31968	-2.32591	0.727163	0.00292979	0.0253319	0.444413	0.446455	0.727163	0.534267	1	0.16667	0.16751	0.727163	0.813867	1	0.201379	0.202199	0.727163	0.774292	1	1.13132	1.13314	0.727163	0.103661	0.753714	-2.15301	-2.1584	0.727163	0.00471342	0.0523266	-1.67389	-1.67725	0.727163	0.0216762	0.152935	-0.479121	-0.481144	0.727163	0.494734	1	-1.0217	-1.02526
108168013	Gm46362	predicted gene, 46362	-3.5975	-3.79588	-1.7355	0.0172778	0.108773	-6.4311	-13.2342	-1.7355	0.00163112	0.0163357	2.8336	9.43827	-1.7355	0.150581	1	6.67926	13.485	-1.7355	0.0011773	0.0394206	2.43168	2.60906	-1.7355	0.097885	0.576958	0.103428	0.104792	-1.7355	0.928987	1	0.248156	0.250847	-1.7355	0.829875	1	-1.16582	-1.18681	-1.7355	0.333934	0.745808	1.41398	1.43766	-1.7355	0.245956	0.841866	0.351584	0.355639
108168016	Gm46365	predicted gene, 46365	-1.604	-1.61805	-0.709462	0.0586118	0.248519	-2.52099	-2.55382	-0.709462	0.00674539	0.0481008	0.916988	0.93577	-0.709462	0.294087	1	0.950727	0.970024	-0.709462	0.273572	0.798234	1.17994	1.19162	-0.709462	0.157316	0.702987	0.149813	0.150569	-0.709462	0.847883	1	-1.57026	-1.5838	-0.709462	0.0617088	0.314049	-0.424063	-0.426431	-0.709462	0.590015	0.938578	-1.1462	-1.15737	-0.709462	0.165633	0.725896	-1.42045	-1.43323
108168067	Gm46403	predicted gene, 46403	0.635748	0.635919	4.17495	0.0107689	0.0771903	0.619131	0.619299	4.17495	0.0128672	0.0772312	0.0166171	0.0166203	4.17495	0.949163	1	-0.558527	-0.558674	4.17495	0.0248354	0.258168	0.596322	0.596427	4.17495	0.0156527	0.217619	0.157786	0.157842	4.17495	0.542335	1	0.0606037	0.0606243	4.17495	0.816243	1	1.23207	1.23235	4.17495	8.10215e-06	0.000361031	-1.17147	-1.17172	4.17495	1.76033e-05	0.00243165	0.21839	0.218466
108168071	Gm46405	predicted gene, 46405	1.23397	1.23869	0.523137	0.0143126	0.0946294	1.40647	1.41159	0.523137	0.00596777	0.0436996	-0.172506	-0.172898	0.523137	0.712835	1	-0.927189	-0.929988	0.523137	0.0577921	0.39781	-0.814727	-0.817419	0.523137	0.0939728	0.568324	-1.01667	-1.02082	0.523137	0.0398419	0.505911	0.479283	0.481597	0.523137	0.321859	0.769425	0.419239	0.421268	0.523137	0.385683	0.794123	0.060044	0.060329	0.523137	0.900193	1	-0.537383	-0.539225
108168101	Gm46430	predicted gene, 46430	-0.688696	-0.688828	4.527	0.0018393	0.0200622	-0.689099	-0.689231	4.527	0.00183447	0.0179354	0.000403199	0.00040321	4.527	0.99875	1	0.537705	0.537814	4.527	0.0156122	0.199422	-0.226946	-0.227006	4.527	0.35189	0.946001	-0.00765818	-0.00765956	4.527	0.976469	1	-0.151394	-0.151418	4.527	0.545803	0.947341	-0.915642	-0.915834	4.527	6.64245e-05	0.00192591	0.764248	0.764417	4.527	0.000631781	0.0290905	-0.159052	-0.159077
108168115	Gm46440	predicted gene, 46440	-6.71319	-8.95122	-2.0213	0.00600418	0.0498561	-0.943923	-0.954174	-2.0213	0.52337	0.833934	-5.76927	-7.99705	-2.0213	0.0165545	0.505761	-1.25215	-1.28129	-2.0213	0.418192	0.924395	2.31604	4.31833	-2.0213	0.342145	0.93523	5.02667	5.43469	-2.0213	0.0144947	0.324437	-2.19607	-2.23547	-2.0213	0.162185	0.549419	-4.39715	-4.63289	-2.0213	0.0217052	0.153029	2.20107	2.39743	-2.0213	0.22706	0.818461	2.83059	3.19922
108168164	LOC108168164	uncharacterized LOC108168164	-4.36271	-4.42271	-1.08584	0.00482692	0.0424308	-2.59645	-2.61331	-1.08584	0.0607514	0.228174	-1.76627	-1.8094	-1.08584	0.227173	1	1.37745	1.39061	-1.08584	0.294494	0.819801	1.83516	1.88151	-1.08584	0.180134	0.745352	3.53098	3.56178	-1.08584	0.0101005	0.275119	-1.219	-1.2227	-1.08584	0.305251	0.752752	-2.52755	-2.5412	-1.08584	0.0463794	0.248664	1.30856	1.31849	-1.08584	0.27143	0.868941	2.31199	2.33908
108168201	Gm46485	predicted gene, 46485	-1.61938	-1.62842	-0.265408	0.0629972	0.259612	-2.63471	-2.65749	-0.265408	0.00618418	0.0448429	1.01533	1.02907	-0.265408	0.257668	1	2.10963	2.1305	-0.265408	0.0233594	0.250275	0.553578	0.557881	-0.265408	0.511554	1	1.25291	1.25895	-0.265408	0.138282	0.822534	-0.525077	-0.526985	-0.265408	0.517915	0.92938	-1.0658	-1.07054	-0.265408	0.201617	0.588887	0.540723	0.543552	-0.265408	0.511837	1	0.727831	0.731961
108168208	Gm45521	predicted gene 45521	3.20685	3.69428	-1.18529	0.0873799	0.320227	5.4707	5.99709	-1.18529	0.00500842	0.0383291	-2.26385	-2.30281	-1.18529	0.121523	0.984675	0.944338	0.949211	-1.18529	0.47107	0.958245	1.26271	1.29157	-1.18529	0.377073	0.964802	-1.00334	-1.29688	-1.18529	0.621561	1	6.41504	6.94631	-1.18529	0.00155752	0.0228709	4.46956	4.98585	-1.18529	0.0179263	0.134475	1.94548	1.96045	-1.18529	0.1578	0.710194	5.4117	5.64942
108168210	Gm46493	predicted gene, 46493	-1.50068	-1.50228	2.1923	0.000892159	0.0116577	-0.798549	-0.799199	2.1923	0.0538168	0.209409	-0.702126	-0.70308	2.1923	0.0967677	0.933828	0.482938	0.483374	2.1923	0.237485	0.752096	0.728259	0.72924	2.1923	0.0847926	0.541726	1.3365	1.33784	2.1923	0.00239161	0.127414	-0.315611	-0.315825	2.1923	0.431492	0.869344	-0.772416	-0.77304	2.1923	0.0611108	0.29859	0.456805	0.457215	2.1923	0.262336	0.859156	1.02089	1.02202
108168237	Gm46513	predicted gene, 46513	-1.92549	-1.93508	-0.155194	0.0179804	0.112024	-3.03888	-3.06382	-0.155194	0.000976872	0.0109708	1.1134	1.12874	-0.155194	0.17835	1	1.73339	1.75327	-0.155194	0.0394552	0.327197	0.172575	0.174007	-0.155194	0.822693	1	0.870359	0.873207	-0.155194	0.244508	0.97427	-1.30549	-1.31055	-0.155194	0.089163	0.39734	-1.75291	-1.76108	-0.155194	0.0283166	0.181871	0.447422	0.450523	-0.155194	0.555973	1	-0.435131	-0.437347
108168252	Gm46527	predicted gene, 46527	-1.25972	-1.28814	-1.93981	0.295327	0.655795	-5.53881	-6.98774	-1.93981	0.00270677	0.0239802	4.2791	5.6996	-1.93981	0.0177696	0.516358	5.16907	6.61171	-1.93981	0.00490924	0.0976306	0.916489	0.939714	-1.93981	0.443411	1	0.677169	0.688978	-1.93981	0.558774	1	-0.369744	-0.37603	-1.93981	0.750075	1	-0.343229	-0.348423	-1.93981	0.764519	1	-0.0265151	-0.0276068	-1.93981	0.981386	1	0.307426	0.312948
108168256	Gm46530	predicted gene, 46530	-2.1037	-2.11881	-0.280782	0.00501808	0.0436548	-2.03107	-2.04524	-0.280782	0.00630047	0.0455167	-0.0726332	-0.0735777	-0.280782	0.91764	1	1.03538	1.045	-0.280782	0.139998	0.60073	1.8568	1.87105	-0.280782	0.0117332	0.184467	1.39521	1.40263	-0.280782	0.0445384	0.531356	-0.995693	-1.00024	-0.280782	0.139421	0.506816	-0.246899	-0.247769	-0.280782	0.703839	0.993398	-0.748794	-0.752469	-0.280782	0.263108	0.860302	0.399517	0.402393
108168283	Gm46548	predicted gene, 46548	-0.858564	-0.85933	1.9496	0.016074	0.103274	-1.43348	-1.43508	1.9496	0.000217292	0.00331262	0.574915	0.57575	1.9496	0.106957	0.956284	0.551222	0.552029	1.9496	0.120298	0.564766	-0.245188	-0.245505	1.9496	0.47836	1	1.18501	1.18621	1.9496	0.00142295	0.0939192	-0.882256	-0.883051	1.9496	0.0133429	0.11108	-1.10375	-1.10483	1.9496	0.00263634	0.0342175	0.221495	0.221784	1.9496	0.520361	1	0.30275	0.303157
108168287	Gm46551	predicted gene, 46551	-1.56877	-1.57063	1.81077	0.00252381	0.0255272	-1.26317	-1.2645	1.81077	0.0115591	0.0712691	-0.305599	-0.306134	1.81077	0.527709	1	0.091613	0.0917562	1.81077	0.847254	1	0.0110062	0.0110252	1.81077	0.981801	1	0.881802	0.8826	1.81077	0.0661626	0.63497	-1.17155	-1.17274	1.81077	0.0172614	0.133208	-1.55776	-1.5596	1.81077	0.00257991	0.0338469	0.386206	0.386865	1.81077	0.419861	0.984445	-0.289752	-0.290139
108168293	LOC108168293	uncharacterized LOC108168293	-1.70122	-1.70313	1.90889	2.70487e-05	0.000667213	-1.68789	-1.68977	1.90889	2.99191e-05	0.000647209	-0.0133357	-0.0133599	1.90889	0.969844	1	0.381436	0.382071	1.90889	0.279416	0.805189	0.387766	0.388407	1.90889	0.272802	0.87101	1.03563	1.03652	1.90889	0.00425993	0.17454	-1.30645	-1.3077	1.90889	0.00053098	0.0100084	-1.31346	-1.31472	1.90889	0.000513307	0.00991693	0.00700637	0.00702414	1.90889	0.983817	1	-0.270822	-0.27118
108168303	Gm46564	predicted gene, 46564	7.9344	8.44815	1.15382	9.91729e-11	1.82658e-08	7.75265	8.26616	1.15382	1.60665e-10	2.33617e-08	0.181747	0.181985	1.15382	0.681632	1	-0.381556	-0.382162	1.15382	0.393384	0.902775	0.13904	0.139203	1.15382	0.752464	1	-0.175894	-0.246361	1.15382	0.9016	1	7.37109	7.884	1.15382	4.61988e-10	8.42866e-08	8.07344	8.58735	1.15382	6.8282e-11	1.85987e-08	-0.702342	-0.70335	1.15382	0.119677	0.626539	7.1952	7.63764
108168336	Gm46592	predicted gene, 46592	-6.56804	-1.44269e+08	-1.79293	0.00427292	0.0387044	-1.61144	-1.64392	-1.79293	0.252957	0.568829	-4.9566	-1.44269e+08	-1.79293	0.0279756	0.623295	1.22901	1.25685	-1.79293	0.381347	0.895209	6.22345	1.44269e+08	-1.79293	0.00638808	0.125932	2.9358	3.04483	-1.79293	0.0617002	0.616468	-0.382429	-0.387074	-1.79293	0.771658	1	-0.344588	-0.348597	-1.79293	0.793032	1	-0.037841	-0.0384772	-1.79293	0.977112	1	2.55337	2.65775
108168350	Gm27217	predicted gene 27217	2.57193	2.60133	-0.526167	0.00511633	0.044231	0.755736	0.770165	-0.526167	0.375319	0.703094	1.8162	1.83116	-0.526167	0.0350502	0.671789	0.549278	0.555939	-0.526167	0.505746	0.983066	0.409563	0.410993	-0.526167	0.59874	1	-1.25691	-1.27744	-0.526167	0.141795	0.830439	1.30501	1.3261	-0.526167	0.127232	0.483121	2.9815	3.01232	-0.526167	0.00166699	0.0243488	-1.67648	-1.68622	-0.526167	0.0453312	0.397578	0.0481028	0.0486682
108168358	Gm46608	predicted gene, 46608	-0.53551	-0.536557	0.963153	0.347563	0.714372	-1.88936	-1.89565	0.963153	0.00348951	0.0289754	1.35385	1.35909	0.963153	0.0298276	0.644207	1.36827	1.37355	0.963153	0.0278457	0.274749	-0.826815	-0.82938	0.963153	0.16042	0.708627	-0.191753	-0.192041	0.963153	0.731589	1	-0.521091	-0.522104	0.963153	0.358849	0.807769	-1.36232	-1.36594	0.963153	0.024106	0.164498	0.841233	0.843833	0.963153	0.152233	0.696813	-0.712845	-0.714145
108168478	Gm14853	predicted gene 14853	-1.72382	-1.7482	-1.99987	0.21758	0.555117	-7.11578	-17.5243	-1.99987	0.00235038	0.021532	5.39196	15.7761	-1.99987	0.017164	0.514168	2.22247	12.2943	-1.99987	0.302136	0.828339	-0.213993	-0.218541	-1.99987	0.878224	1	3.86667	4.01887	-1.99987	0.0214319	0.382077	-4.89331	-5.23007	-1.99987	0.00832056	0.0799668	-1.93782	-1.96674	-1.99987	0.16836	0.534368	-2.95549	-3.26333	-1.99987	0.0902351	0.55522	-1.02664	-1.2112
108168483	Gm46688	predicted gene, 46688	-1.74343	-1.74843	0.42556	0.00216974	0.0227675	-2.89849	-2.91226	0.42556	1.60161e-05	0.000377725	1.15507	1.16384	0.42556	0.0420994	0.727819	1.91386	1.92555	0.42556	0.00145901	0.0450013	-0.274252	-0.275811	0.42556	0.603764	1	1.62831	1.63276	0.42556	0.00360104	0.160921	-0.984628	-0.986712	0.42556	0.0591343	0.306677	-2.01768	-2.02424	0.42556	0.00061973	0.0113494	1.03305	1.03752	0.42556	0.0552225	0.440754	0.643681	0.646052
108168486	LOC108168486	uncharacterized LOC108168486	-5.57204	-5.98177	-1.45134	0.00259409	0.0261015	-3.91884	-4.03056	-1.45134	0.0117779	0.0721941	-1.6532	-1.95121	-1.45134	0.360786	1	2.09817	2.19038	-1.45134	0.150655	0.622566	3.07545	3.44904	-1.45134	0.0782515	0.525045	0.869811	0.876289	-1.45134	0.480075	1	-1.82067	-1.84019	-1.45134	0.158187	0.541639	-2.49659	-2.53273	-1.45134	0.0665617	0.313196	0.675919	0.692548	-1.45134	0.604561	1	-0.950861	-0.963898
108168644	Gm46717	predicted gene, 46717	-4.65498	-4.71259	-0.592371	0.000824942	0.0109722	-5.95541	-6.10653	-0.592371	0.000181866	0.00288761	1.30043	1.39394	-0.592371	0.355517	1	0.758663	0.82354	-0.592371	0.597203	1	0.83206	0.859783	-0.592371	0.483497	1	2.80942	2.82369	-0.592371	0.0156647	0.332746	-5.19674	-5.28299	-0.592371	0.000389198	0.00782279	-3.82292	-3.85281	-0.592371	0.00259059	0.0338823	-1.37383	-1.43018	-0.592371	0.266201	0.863456	-2.38733	-2.45931
108168756	Gm46741	predicted gene, 46741	-1.72547	-1.72778	1.56452	0.00263334	0.0264551	-2.11903	-2.12238	1.56452	0.000446436	0.00597483	0.393557	0.394601	1.56452	0.465906	1	0.837398	0.839313	1.56452	0.123695	0.571625	0.216226	0.216714	1.56452	0.682204	1	1.27281	1.27422	1.56452	0.0188302	0.364887	-1.28163	-1.28307	1.56452	0.0183854	0.139359	-1.50925	-1.51107	1.56452	0.0065925	0.0661489	0.227615	0.227998	1.56452	0.663216	1	-0.00882612	-0.00885015
108168767	Gm46746	predicted gene, 46746	-6.28575	-6.76678	-1.43079	0.000244324	0.0041009	-2.24269	-2.2627	-1.43079	0.0503604	0.200189	-4.04306	-4.50408	-1.43079	0.00995611	0.392613	-2.10467	-2.1917	-1.43079	0.0925326	0.497772	3.26697	3.7112	-1.43079	0.0338161	0.336858	5.64478	5.93266	-1.43079	0.000405908	0.043131	-4.34736	-4.45441	-1.43079	0.00178853	0.0253024	-3.01878	-3.05559	-1.43079	0.0130801	0.107916	-1.32858	-1.39882	-1.43079	0.27962	0.876772	1.29742	1.47825
108168783	Gm46756	predicted gene, 46756	-3.14544	-3.17098	-0.0565536	0.00160863	0.0180868	-1.69815	-1.7054	-0.0565536	0.0482372	0.194273	-1.44729	-1.46558	-0.0565536	0.111239	0.964506	1.19297	1.19886	-0.0565536	0.15492	0.629543	1.75079	1.77108	-0.0565536	0.0557715	0.449814	2.63452	2.65128	-0.0565536	0.00497223	0.19079	-0.50518	-0.506533	-0.0565536	0.525599	0.93347	-1.39465	-1.3999	-0.0565536	0.0955267	0.388515	0.889468	0.893365	-0.0565536	0.278148	0.876772	2.12934	2.14475
108168882	Gm46814	predicted gene, 46814	-2.31087	-2.31785	0.752276	0.00129811	0.0154926	-1.32961	-1.33229	0.752276	0.0390754	0.169283	-0.981256	-0.985561	0.752276	0.134284	0.99996	-0.755262	-0.758317	0.752276	0.239739	0.755592	0.956506	0.96076	0.752276	0.142789	0.681235	1.2071	1.20941	0.752276	0.0576878	0.600149	-2.08488	-2.09061	0.752276	0.00279506	0.0353674	-1.35436	-1.35709	0.752276	0.035457	0.210723	-0.730511	-0.733516	0.752276	0.253666	0.849865	-0.877771	-0.881201
108168899	Gm46824	predicted gene, 46824	-1.53476	-1.53771	1.42996	0.000470179	0.00693576	-0.742465	-0.743509	1.42996	0.0613028	0.229582	-0.792296	-0.794198	1.42996	0.0530181	0.776539	0.0887623	0.0889169	1.42996	0.820506	1	0.521407	0.522781	1.42996	0.197201	0.772781	0.404166	0.404669	1.42996	0.297585	1	-0.653703	-0.654592	1.42996	0.0960407	0.413199	-1.01335	-1.01493	1.42996	0.012727	0.10577	0.359651	0.360334	1.42996	0.361521	0.94479	-0.249536	-0.249923
108168906	Gm43707	predicted gene 43707	-1.75231	-1.75975	0.535517	0.00215259	0.0226121	-0.698421	-0.700372	0.535517	0.171399	0.449852	-1.05389	-1.05938	0.535517	0.0517501	0.773155	0.5081	0.50961	0.535517	0.317276	0.847578	0.834124	0.838802	0.535517	0.118584	0.630545	0.477312	0.478533	0.535517	0.342503	1	-0.190321	-0.190762	0.535517	0.701783	1	-0.918186	-0.920947	0.535517	0.0761592	0.340853	0.727865	0.730185	0.535517	0.156339	0.707138	0.286991	0.287771
108168907	Gm46829	predicted gene, 46829	-2.02442	-2.02648	2.49507	2.65331e-07	1.4495e-05	-1.11019	-1.11097	2.49507	0.000666201	0.0081675	-0.914228	-0.91551	2.49507	0.00556904	0.275447	0.572408	0.572881	2.49507	0.0611589	0.410773	0.64678	0.647765	2.49507	0.0430845	0.387471	0.456911	0.45716	2.49507	0.125186	0.794022	-0.537783	-0.538085	2.49507	0.0725243	0.34794	-1.37764	-1.37871	2.49507	5.60175e-05	0.00169534	0.839855	0.840626	2.49507	0.00814529	0.150477	-0.0808718	-0.0809258
108168909	Gm46830	predicted gene, 46830	-7.06363	-1.44269e+08	-1.83027	0.00348216	0.0329137	-2.4301	-2.47896	-1.83027	0.113626	0.345614	-4.63353	-1.44269e+08	-1.83027	0.0483379	0.758156	1.81521	1.85829	-1.83027	0.228931	0.741467	3.38907	1.44269e+08	-1.83027	0.142668	0.681235	2.55413	2.60836	-1.83027	0.0979975	0.735133	-0.614894	-0.620676	-1.83027	0.654297	0.993141	-3.67456	-3.8012	-1.83027	0.0301147	0.189135	3.05966	3.18052	-1.83027	0.0642482	0.470718	1.93924	1.98768
108168925	Gm46841	predicted gene, 46841	-1.64332	-1.64768	0.941164	0.00239824	0.0245655	-1.32647	-1.32956	0.941164	0.0107485	0.0676642	-0.316852	-0.318121	0.941164	0.529421	1	0.366818	0.367971	0.941164	0.459235	0.952357	1.41455	1.41856	0.941164	0.00761836	0.139884	1.05136	1.05354	0.941164	0.0367576	0.486887	-0.959648	-0.961587	0.941164	0.0544968	0.290302	-0.228765	-0.229117	0.941164	0.632469	0.960909	-0.730883	-0.732471	0.941164	0.138748	0.670226	0.0917112	0.0919547
108168930	Gm46845	predicted gene, 46845	-1.3616	-1.37122	-0.646565	0.128766	0.409775	-2.3952	-2.42166	-0.646565	0.0150286	0.0862462	1.0336	1.05044	-0.646565	0.269655	1	1.90905	1.93305	-0.646565	0.0464466	0.35445	-2.31926	-2.38463	-0.646565	0.0255214	0.285294	0.20952	0.210471	-0.646565	0.804461	1	-0.486146	-0.488603	-0.646565	0.567964	0.958057	-3.68086	-3.75585	-0.646565	0.00101879	0.0167117	3.19472	3.26725	-0.646565	0.00321282	0.0879286	-0.276626	-0.278132
108168931	Gm46846	predicted gene, 46846	-1.5778	-1.60942	-1.67783	0.230367	0.571602	-6.54539	-1.44269e+08	-1.67783	0.00252151	0.0226702	4.96759	1.44269e+08	-1.67783	0.0189634	0.523049	6.46491	1.44269e+08	-1.67783	0.00280773	0.0694355	1.42386	1.4537	-1.67783	0.27873	0.875434	1.66826	1.70207	-1.67783	0.203646	0.92798	-0.0804725	-0.0813514	-1.67783	0.947398	1	-0.15394	-0.15572	-1.67783	0.899832	1	0.0734676	0.074369	-1.67783	0.952207	1	1.58779	1.62072
108168980	Gm46871	predicted gene, 46871	-0.603037	-0.606171	-0.0805116	0.380525	0.749922	-1.1617	-1.1692	-0.0805116	0.103521	0.326112	0.558665	0.56303	-0.0805116	0.428613	1	1.49851	1.50727	-0.0805116	0.0400061	0.329488	1.08975	1.09462	-0.0805116	0.120102	0.633263	2.07129	2.091	-0.0805116	0.00806706	0.24778	0.33681	0.338068	-0.0805116	0.616848	0.979733	0.486713	0.488451	-0.0805116	0.469742	0.86132	-0.149904	-0.150383	-0.0805116	0.822928	1	2.4081	2.42907
108169018	Gm46899	predicted gene, 46899	-1.95216	-1.95695	0.899203	0.000544547	0.00778919	-1.46277	-1.46569	0.899203	0.0056526	0.0420606	-0.489398	-0.491256	0.899203	0.335528	1	-0.152569	-0.153089	0.899203	0.759671	1	0.812487	0.815261	0.899203	0.112747	0.6142	1.29491	1.29735	0.899203	0.0123902	0.300269	-1.61533	-1.61878	0.899203	0.00266118	0.0341277	-1.13968	-1.14169	0.899203	0.0251261	0.169014	-0.475657	-0.477094	0.899203	0.34024	0.925965	-0.320426	-0.321429
108169031	Gm46903	predicted gene, 46903	2.02909	2.03587	0.617491	0.00321447	0.0310203	0.737295	0.740892	0.617491	0.246413	0.559909	1.2918	1.29498	0.617491	0.0441961	0.736767	0.584414	0.586207	0.617491	0.347304	0.871369	-1.1544	-1.15709	0.617491	0.0681666	0.493674	-0.566457	-0.569378	0.617491	0.370509	1	1.32171	1.3271	0.617491	0.042469	0.247159	0.874698	0.878781	0.617491	0.169718	0.536222	0.447011	0.448318	0.617491	0.468154	1	0.755252	0.75772
108169121	Gm46945	predicted gene, 46945	-0.902098	-0.909766	-0.808383	0.324192	0.690632	-6.1638	-6.97696	-0.808383	0.000129442	0.00219779	5.2617	6.06719	-0.808383	0.000779057	0.0788806	6.10023	6.91297	-0.808383	0.00014964	0.00907173	0.117139	0.118453	-0.808383	0.898368	1	0.0157955	0.0158761	-0.808383	0.985771	1	-0.0635712	-0.0639945	-0.808383	0.942846	1	-0.784959	-0.791312	-0.808383	0.388007	0.796031	0.721388	0.727318	-0.808383	0.429137	0.990073	-0.0477758	-0.0481183
108169134	Gm46954	predicted gene, 46954	-1.19056	-1.19131	2.78138	0.000598733	0.0084149	-1.40559	-1.40654	2.78138	9.75574e-05	0.00174207	0.215028	0.215235	2.78138	0.506726	1	0.480795	0.481227	2.78138	0.138443	0.598663	0.361445	0.361738	2.78138	0.259344	0.854607	0.27664	0.276762	2.78138	0.37369	1	-0.924797	-0.925317	2.78138	0.00535714	0.0573335	-0.829119	-0.829571	2.78138	0.0117285	0.0998532	-0.0956782	-0.0957461	2.78138	0.761502	1	-0.648157	-0.648555
108169155	Gm46967	predicted gene, 46967	-1.78151	-1.7877	0.308686	0.00133605	0.0158029	-1.55152	-1.55642	0.308686	0.00403488	0.0322291	-0.229986	-0.231272	0.308686	0.651063	1	0.38362	0.385361	0.308686	0.445622	0.943876	0.148004	0.148872	0.308686	0.770356	1	1.4803	1.48483	0.308686	0.00548214	0.199284	-1.1679	-1.17106	0.308686	0.0231593	0.163594	-1.6335	-1.63882	0.308686	0.00266554	0.0345271	0.465602	0.467761	0.308686	0.355036	0.939545	0.312403	0.31377
108169181	LOC108169181	uncharacterized LOC108169181	-0.552088	-0.552199	4.46527	0.00419987	0.0381858	-0.165263	-0.165292	4.46527	0.526461	0.836654	-0.386824	-0.386907	4.46527	0.0623899	0.807062	-0.294057	-0.294118	4.46527	0.189051	0.686455	0.430796	0.430887	4.46527	0.0329851	0.331863	0.41447	0.41455	4.46527	0.0410918	0.511373	-0.459321	-0.45941	4.46527	0.0206591	0.150822	-0.121292	-0.121313	4.46527	0.660351	0.97418	-0.338029	-0.338097	4.46527	0.115841	0.616658	-0.0448506	-0.0448605
108169182	Gm46982	predicted gene, 46982	6.09598	10.857	-1.92608	0.0046703	0.0414307	5.18617	9.92907	-1.92608	0.0140156	0.0821355	0.909811	0.92796	-1.92608	0.512411	1	0.884181	0.901973	-1.92608	0.523536	0.992322	0.352171	0.356679	-1.92608	0.792309	1	-2.87172	-7.45029	-1.92608	0.162094	0.865951	6.07035	10.831	-1.92608	0.00478495	0.0529383	6.44815	11.2137	-1.92608	0.00303854	0.0379987	-0.3778	-0.382666	-1.92608	0.777305	1	3.19863	3.38075
108653	Rimklb	ribosomal modification protein rimK-like family member B	-0.328199	-0.328214	6.50105	0.069143	0.275743	-0.450581	-0.450603	6.50105	0.00196708	0.0188884	0.122382	0.122389	6.50105	0.841984	1	0.270247	0.270261	6.50105	0.22236	0.732951	-0.142958	-0.142965	6.50105	0.780053	1	0.164223	0.16423	6.50105	0.703365	1	-0.180334	-0.180342	6.50105	0.634463	0.986609	-0.471156	-0.471179	6.50105	0.000969773	0.0161676	0.290823	0.290837	6.50105	0.153775	0.701126	-0.0161111	-0.0161118
108660	Rnf187	ring finger protein 187	0.522332	0.522337	8.94227	5.50949e-07	2.64387e-05	0.543739	0.543744	8.94227	1.72338e-07	8.08941e-06	-0.0214064	-0.0214066	8.94227	0.999568	1	-0.248061	-0.248063	8.94227	0.354978	0.875804	-0.14316	-0.143161	8.94227	0.943914	1	-0.194838	-0.19484	8.94227	0.748689	1	0.295678	0.295681	8.94227	0.091225	0.401685	0.379173	0.379177	8.94227	0.00187522	0.0267774	-0.0834953	-0.083496	8.94227	0.993722	1	0.100839	0.10084
108664	Atp6v1h	ATPase, H+ transporting, lysosomal V1 subunit H	0.471887	0.471901	7.17879	0.00463831	0.0412225	0.337299	0.337309	7.17879	0.083038	0.2806	0.134589	0.134592	7.17879	0.707844	1	-0.0103766	-0.0103769	7.17879	0.984025	1	-0.415772	-0.415784	7.17879	0.0174073	0.232585	0.0161502	0.0161508	7.17879	0.974896	1	0.326922	0.326932	7.17879	0.0990778	0.420928	0.0561157	0.0561176	7.17879	0.906454	1	0.270806	0.270815	7.17879	0.227183	0.818461	0.343072	0.343083
108687	Edem2	ER degradation enhancer, mannosidase alpha-like 2	0.13036	0.13037	5.93221	0.737681	0.985025	0.323094	0.323115	5.93221	0.100696	0.319765	-0.192733	-0.192745	5.93221	0.511223	1	-0.566115	-0.566156	5.93221	0.000289204	0.0143041	-0.102661	-0.102668	5.93221	0.816046	1	0.0919403	0.0919473	5.93221	0.843128	1	-0.243022	-0.243041	5.93221	0.317882	0.765066	0.0276996	0.0277017	5.93221	0.961691	1	-0.270721	-0.270743	5.93221	0.226429	0.817878	-0.151081	-0.151094
108699	Chn1	chimerin 1	0.493707	0.493727	6.78289	0.00154159	0.0175473	0.339699	0.339713	6.78289	0.0699687	0.251148	0.154008	0.154013	6.78289	0.675428	1	-0.162473	-0.162479	6.78289	0.643917	1	-0.0615655	-0.0615677	6.78289	0.917928	1	0.0523373	0.0523398	6.78289	0.932071	1	0.177226	0.177234	6.78289	0.5865	0.96755	0.432141	0.432159	6.78289	0.00826738	0.0775754	-0.254915	-0.254925	6.78289	0.278043	0.876772	0.229564	0.229574
108705	Pttg1ip	pituitary tumor-transforming 1 interacting protein	-0.121641	-0.121643	8.13296	0.957154	1	-0.0581122	-0.0581131	8.13296	0.995057	1	-0.0635285	-0.0635296	8.13296	0.993929	1	-0.168041	-0.168044	8.13296	0.840235	1	0.0139011	0.0139013	8.13296	0.999345	1	-0.1938	-0.193803	8.13296	0.714287	1	-0.226154	-0.226157	8.13296	0.498203	0.916198	-0.10774	-0.107741	8.13296	0.972557	1	-0.118414	-0.118416	8.13296	0.9611	1	-0.419954	-0.41996
108767	Pnrc1	proline-rich nuclear receptor coactivator 1	-0.524314	-0.524328	7.45001	6.51128e-05	0.00138072	-0.513173	-0.513187	7.45001	0.000100405	0.00177815	-0.0111408	-0.0111411	7.45001	0.995759	1	0.47902	0.479033	7.45001	0.000377298	0.0171959	0.184231	0.184236	7.45001	0.64697	1	-0.115543	-0.115545	7.45001	0.892418	1	-0.0341526	-0.0341534	7.45001	0.986176	1	-0.340083	-0.340091	7.45001	0.0433152	0.239099	0.30593	0.305938	7.45001	0.10438	0.590384	-0.149695	-0.149698
108800	Ston2	stonin 2	-0.494873	-0.495016	3.98122	0.0323726	0.16843	-0.79585	-0.796106	3.98122	0.000670977	0.00820229	0.300976	0.30109	3.98122	0.214854	1	0.612425	0.612635	3.98122	0.00813524	0.133215	0.48333	0.483471	3.98122	0.0372064	0.355853	-0.0427837	-0.0427938	3.98122	0.867587	1	-0.183424	-0.183472	3.98122	0.461036	0.892093	-0.011543	-0.0115453	3.98122	0.964181	1	-0.171881	-0.171926	3.98122	0.491374	1	-0.226208	-0.226265
108811	Ccdc122	coiled-coil domain containing 122	-0.357176	-0.357572	1.77673	0.334732	0.701114	0.0769059	0.0769817	1.77673	0.832765	1	-0.434082	-0.434554	1.77673	0.244949	1	-1.08547	-1.08697	1.77673	0.0059067	0.109311	-1.12145	-1.1236	1.77673	0.00531227	0.1124	0.25127	0.251535	1.77673	0.493708	1	-1.00857	-1.00999	1.77673	0.00970701	0.0892543	-1.47863	-1.48117	1.77673	0.000405113	0.0081361	0.470062	0.47118	1.77673	0.223327	0.813049	-0.757298	-0.758453
108816	4933409K07Rik	RIKEN cDNA 4933409K07 gene	-0.861899	-0.862013	5.13981	4.64652e-07	2.30408e-05	-0.743678	-0.743772	5.13981	7.6315e-06	0.000205551	-0.118221	-0.118241	5.13981	0.728297	1	0.27019	0.27023	5.13981	0.230787	0.743525	0.643792	0.643884	5.13981	0.000102439	0.00664789	0.0764327	0.0764403	5.13981	0.849221	1	-0.473488	-0.473543	5.13981	0.00606979	0.0628393	-0.218106	-0.218129	5.13981	0.395928	0.802522	-0.255382	-0.255413	5.13981	0.273125	0.869908	-0.397055	-0.397102
108829	Jmjd1c	jumonji domain containing 1C	-0.453582	-0.453614	5.88087	0.00392668	0.03623	-0.407046	-0.407075	5.88087	0.0137706	0.0813654	-0.0465361	-0.0465399	5.88087	0.945926	1	0.180436	0.180449	5.88087	0.583988	1	0.0603967	0.0604016	5.88087	0.926116	1	0.380188	0.380215	5.88087	0.0267025	0.424262	-0.22661	-0.226625	5.88087	0.390808	0.832245	-0.393185	-0.393213	5.88087	0.019433	0.142246	0.166575	0.166588	5.88087	0.640235	1	0.153578	0.15359
108871	4930447M23Rik	RIKEN cDNA 4930447M23 gene	0.983986	0.985405	1.91684	0.00975736	0.0716392	0.575374	0.576319	1.91684	0.121738	0.361309	0.408611	0.409085	1.91684	0.261204	1	0.667653	0.668364	1.91684	0.0702049	0.439663	-0.215108	-0.21534	1.91684	0.548156	1	-0.607416	-0.608397	1.91684	0.102253	0.749521	1.24303	1.24468	1.91684	0.00148634	0.0221622	0.768877	0.770065	1.91684	0.0398616	0.226931	0.47415	0.474619	1.91684	0.189838	0.766695	0.635611	0.636287
108897	Aif1l	allograft inflammatory factor 1-like	-0.181077	-0.181085	6.73578	0.642933	0.938046	-0.292731	-0.292744	6.73578	0.145171	0.406348	0.111654	0.11166	6.73578	0.881404	1	0.229266	0.229276	6.73578	0.404473	0.913759	0.240298	0.240309	6.73578	0.351239	0.945247	-0.398246	-0.398261	6.73578	0.00879967	0.257924	-0.0634654	-0.0634681	6.73578	0.958427	1	0.0592216	0.0592241	6.73578	0.962823	1	-0.122687	-0.122692	6.73578	0.856283	1	-0.461712	-0.461729
108899	2700081O15Rik	RIKEN cDNA 2700081O15 gene	0.509319	0.509361	5.88782	0.00123139	0.0148836	0.455568	0.455607	5.88782	0.00523022	0.0396811	0.0537504	0.0537542	5.88782	0.92388	1	0.0625588	0.0625632	5.88782	0.908927	1	0.0574422	0.0574462	5.88782	0.918162	1	-0.348018	-0.348048	5.88782	0.0625094	0.619468	0.518127	0.51817	5.88782	0.000955475	0.0158473	0.566761	0.566807	5.88782	0.000236597	0.00528355	-0.0486338	-0.0486371	5.88782	0.932912	1	0.170109	0.170122
108902	B4gat1	beta-1,4-glucuronyltransferase 1	0.149748	0.149756	6.44073	0.743442	0.987393	0.211678	0.211689	6.44073	0.475853	0.795309	-0.06193	-0.061933	6.44073	0.946337	1	-0.365235	-0.365254	6.44073	0.029971	0.286368	-0.124693	-0.124699	6.44073	0.823604	1	-0.295198	-0.295212	6.44073	0.144184	0.835047	-0.153557	-0.153566	6.44073	0.728536	1	0.0250552	0.0250566	6.44073	0.982094	1	-0.178612	-0.178622	6.44073	0.626062	1	-0.448755	-0.448778
108903	Tbcd	tubulin-specific chaperone d	0.506792	0.506822	6.30184	0.000634139	0.00884183	0.538297	0.538329	6.30184	0.000233331	0.00351433	-0.0315055	-0.031507	6.30184	0.970353	1	-0.171599	-0.171608	6.30184	0.633835	1	-0.0732887	-0.0732924	6.30184	0.916022	1	-0.0984287	-0.0984353	6.30184	0.866388	1	0.366698	0.366721	6.30184	0.0338496	0.213439	0.433503	0.43353	6.30184	0.00576456	0.0601948	-0.0668048	-0.0668084	6.30184	0.925952	1	0.26827	0.268286
108907	Nusap1	nucleolar and spindle associated protein 1	0.687161	0.687255	5.23173	5.05394e-05	0.00111957	0.572899	0.57298	5.23173	0.000811585	0.00951227	0.114262	0.114275	5.23173	0.732118	1	-0.110649	-0.110662	5.23173	0.742575	1	0.419617	0.419656	5.23173	0.0221767	0.263608	-0.286136	-0.286181	5.23173	0.192102	0.915479	0.46225	0.462318	5.23173	0.00969339	0.0891898	1.10678	1.10691	5.23173	6.79988e-09	8.53915e-07	-0.644528	-0.644593	5.23173	0.000130007	0.00948759	0.176114	0.176137
108912	Cdca2	cell division cycle associated 2	0.449895	0.450009	4.23874	0.0455422	0.211057	0.417324	0.417432	4.23874	0.0657936	0.241347	0.0325701	0.0325772	4.23874	0.899679	1	-0.209053	-0.209103	4.23874	0.393175	0.902775	0.387638	0.387711	4.23874	0.0888836	0.555886	0.010285	0.0102872	4.23874	0.968238	1	0.208271	0.208329	4.23874	0.395094	0.836809	0.837532	0.83772	4.23874	0.000185509	0.00438576	-0.629261	-0.629391	4.23874	0.00418247	0.102256	0.218556	0.218616
108934	Smim13	small integral membrane protein 13	0.363409	0.363427	6.5353	0.0480606	0.218636	0.243718	0.243731	6.5353	0.314985	0.640462	0.119691	0.119696	6.5353	0.765955	1	0.255662	0.255673	6.5353	0.274174	0.798745	-0.238837	-0.238849	6.5353	0.332454	0.928558	-0.260953	-0.260967	6.5353	0.256868	0.987996	0.49938	0.499404	6.5353	0.00185412	0.0259663	0.124572	0.124579	6.5353	0.75149	1	0.374808	0.374825	6.5353	0.03793	0.365485	0.238426	0.238437
108961	E2f8	E2F transcription factor 8	0.871901	0.872449	3.05784	0.00202556	0.0215706	0.74998	0.75047	3.05784	0.00683346	0.0485497	0.121921	0.121979	3.05784	0.654612	1	-0.0833133	-0.083356	3.05784	0.760326	1	0.224277	0.224372	3.05784	0.406881	0.983233	-0.266897	-0.267103	3.05784	0.329227	1	0.666667	0.667114	3.05784	0.0151665	0.121359	1.09618	1.09682	3.05784	0.000186862	0.00440172	-0.429511	-0.429707	3.05784	0.110157	0.604865	0.39977	0.40001
109006	Ciapin1	cytokine induced apoptosis inhibitor 1	0.282447	0.282459	6.88646	0.189911	0.513375	0.291609	0.291621	6.88646	0.164886	0.439522	-0.00916183	-0.00916215	6.88646	0.989252	1	-0.102891	-0.102895	6.88646	0.83209	1	0.177757	0.177763	6.88646	0.58473	1	-0.164596	-0.164603	6.88646	0.635583	1	0.188718	0.188726	6.88646	0.539977	0.943864	0.460205	0.460222	6.88646	0.00389787	0.0454649	-0.271487	-0.271496	6.88646	0.222707	0.812364	0.0241219	0.0241228
109050	Fam212b	family with sequence similarity 212, member B	1.47073	1.47104	5.01188	1.91352e-11	5.13966e-09	1.84096	1.84131	5.01188	1.25162e-13	6.20645e-11	-0.37023	-0.370269	5.01188	0.0544499	0.779872	-0.0495241	-0.0495287	5.01188	0.901076	1	-0.0216124	-0.021615	5.01188	0.957435	1	-0.160907	-0.160959	5.01188	0.573247	1	1.79144	1.79178	5.01188	2.25723e-13	1.1798e-10	1.44912	1.44942	5.01188	2.57962e-11	8.31455e-09	0.342318	0.342355	5.01188	0.0861006	0.545755	1.63053	1.63082
109054	Pfdn4	prefoldin 4	0.663842	0.664045	4.00319	0.00101497	0.0128881	0.73853	0.73875	4.00319	0.000267592	0.00393534	-0.0746882	-0.0747058	4.00319	0.782267	1	-0.141021	-0.141055	4.00319	0.585372	1	-0.0966406	-0.0966651	4.00319	0.717097	1	-0.0531784	-0.0531986	4.00319	0.843914	1	0.597509	0.597696	4.00319	0.00313528	0.0385462	0.567201	0.56738	4.00319	0.00522434	0.0564118	0.0303077	0.0303159	4.00319	0.912296	1	0.54433	0.544497
109077	Ints5	integrator complex subunit 5	0.370564	0.37059	6.15998	0.0358989	0.180324	0.49	0.490033	6.15998	0.00161262	0.0162306	-0.119435	-0.119443	6.15998	0.791594	1	-0.15829	-0.1583	6.15998	0.66294	1	0.243086	0.2431	6.15998	0.321979	0.91857	-0.46016	-0.460192	6.15998	0.00372025	0.163143	0.331709	0.331733	6.15998	0.0808612	0.374471	0.61365	0.613691	6.15998	3.96759e-05	0.00126825	-0.281941	-0.281958	6.15998	0.190677	0.767348	-0.128451	-0.128459
109095	Rbm15b	RNA binding motif protein 15B	0.444721	0.444751	6.14185	0.0124484	0.0857348	0.512456	0.512491	6.14185	0.00272426	0.0240375	-0.0677353	-0.0677391	6.14185	0.862881	1	-0.065776	-0.0657798	6.14185	0.867501	1	-0.0714178	-0.0714221	6.14185	0.854265	1	-0.31351	-0.313532	6.14185	0.131315	0.811382	0.44668	0.446711	6.14185	0.0119203	0.103144	0.373303	0.373329	6.14185	0.0501138	0.262429	0.0733771	0.0733815	6.14185	0.84976	1	0.133171	0.133179
109113	Uhrf2	ubiquitin-like, containing PHD and RING finger domains 2	-0.728779	-0.728854	5.46906	1.84201e-05	0.000488169	-0.651489	-0.651554	5.46906	0.000119682	0.00205451	-0.0772906	-0.0773005	5.46906	0.828219	1	0.390671	0.390713	5.46906	0.0395915	0.327906	0.306302	0.306338	5.46906	0.148692	0.691071	0.101748	0.101756	5.46906	0.770665	1	-0.260818	-0.26084	5.46906	0.257153	0.695446	-0.422477	-0.422516	5.46906	0.0211993	0.150892	0.161659	0.161676	5.46906	0.581181	1	-0.15907	-0.159084
109115	Supt3	suppressor of Ty 3	-0.0773449	-0.0773803	3.08533	0.76252	0.995637	-0.456206	-0.456445	3.08533	0.0560751	0.215291	0.378862	0.379065	3.08533	0.1179	0.980331	-0.0814611	-0.0815118	3.08533	0.750851	1	-0.74973	-0.750192	3.08533	0.00187806	0.0542087	-0.236714	-0.236811	3.08533	0.339245	1	-0.537668	-0.537957	3.08533	0.0234237	0.164844	-0.827075	-0.827573	3.08533	0.000660684	0.0119523	0.289408	0.289615	3.08533	0.242666	0.837124	-0.774381	-0.774768
109151	Chd9	chromodomain helicase DNA binding protein 9	-0.634631	-0.63471	5.08858	6.59417e-05	0.00139219	-0.729962	-0.730057	5.08858	5.12561e-06	0.000145343	0.0953312	0.0953464	5.08858	0.813622	1	0.323634	0.323681	5.08858	0.106009	0.530156	0.241062	0.241096	5.08858	0.321104	0.918206	0.288768	0.2888	5.08858	0.178351	0.89323	-0.406329	-0.406375	5.08858	0.0212226	0.153832	-0.39357	-0.393614	5.08858	0.0279554	0.180753	-0.012759	-0.0127606	5.08858	0.98003	1	-0.11756	-0.117575
109181	Trip11	thyroid hormone receptor interactor 11	-0.27159	-0.271634	4.53861	0.242656	0.58902	-0.348268	-0.348326	4.53861	0.115598	0.349652	0.0766777	0.0766917	4.53861	0.772499	1	-0.36152	-0.361597	4.53861	0.101349	0.518668	-0.281178	-0.281234	4.53861	0.224164	0.81034	0.339485	0.339541	4.53861	0.12671	0.800503	-0.709788	-0.709923	4.53861	0.000535384	0.0100796	-0.552768	-0.552868	4.53861	0.00728271	0.0708096	-0.157019	-0.157055	4.53861	0.534335	1	-0.370303	-0.370382
109212	Pimreg	PICALM interacting mitotic regulator	0.769212	0.76931	5.44688	4.80626e-05	0.00107579	0.756126	0.756223	5.44688	6.2524e-05	0.00120314	0.0130859	0.0130872	5.44688	0.966025	1	-0.226328	-0.226352	5.44688	0.349224	0.872339	0.65673	0.65678	5.44688	0.000417739	0.0191892	-0.306544	-0.306589	5.44688	0.163343	0.86998	0.529798	0.529871	5.44688	0.00561215	0.0592431	1.42594	1.42609	5.44688	5.9528e-10	1.11768e-07	-0.896143	-0.896219	5.44688	3.52855e-06	0.000833805	0.223254	0.223282
109225	Ms4a7	membrane-spanning 4-domains, subfamily A, member 7	3.13992	3.15574	0.450957	0.000116178	0.00219197	2.55304	2.56786	0.450957	0.00090296	0.0103144	0.586878	0.587887	0.450957	0.35506	1	-1.71577	-1.72269	0.450957	0.0144589	0.190344	-1.24635	-1.24912	0.450957	0.0597365	0.466012	-0.173145	-0.175242	0.450957	0.804076	1	0.837267	0.845165	0.450957	0.226992	0.652467	1.89357	1.90663	0.450957	0.00928259	0.0848775	-1.0563	-1.06146	0.450957	0.117322	0.619917	0.664122	0.669923
109242	Kif24	kinesin family member 24	-0.331497	-0.331742	2.61349	0.287989	0.646254	-0.045596	-0.0456265	2.61349	0.882755	1	-0.285901	-0.286115	2.61349	0.361127	1	0.294027	0.294208	2.61349	0.343279	0.868564	0.137697	0.137808	2.61349	0.659183	1	0.751194	0.751837	2.61349	0.020857	0.378214	0.248431	0.248581	2.61349	0.42052	0.858938	-0.1938	-0.193934	2.61349	0.531371	0.903798	0.442231	0.442515	2.61349	0.156668	0.707453	0.999625	1.00042
109294	Prex2	phosphatidylinositol-3,4,5-trisphosphate-dependent Rac exchange factor 2	-2.16301	-2.16407	3.38589	2.50456e-09	2.75202e-07	-2.36027	-2.36153	3.38589	5.97167e-10	6.98466e-08	0.19726	0.197458	3.38589	0.474814	1	1.03869	1.03948	3.38589	0.00033671	0.0158434	1.26914	1.26994	3.38589	2.09916e-05	0.00202978	0.712236	0.71243	3.38589	0.0062272	0.213904	-1.32159	-1.32204	3.38589	7.08674e-06	0.000286524	-0.893869	-0.894129	3.38589	0.00087091	0.0147904	-0.427717	-0.427913	3.38589	0.101617	0.5856	-0.60935	-0.609612
109333	Pkn2	protein kinase N2	-0.434039	-0.43408	5.53083	0.0241886	0.137664	-0.506808	-0.506857	5.53083	0.00638276	0.0460411	0.0727689	0.0727771	5.53083	0.815139	1	0.290785	0.290815	5.53083	0.188853	0.686292	0.201403	0.201423	5.53083	0.427358	0.996177	0.0921758	0.0921835	5.53083	0.765556	1	-0.216023	-0.216042	5.53083	0.38392	0.828361	-0.232637	-0.232657	5.53083	0.33473	0.746895	0.0166135	0.016615	5.53083	0.959973	1	-0.123847	-0.123859
109349	Fam163b	family with sequence similarity 163, member B	0.532693	0.533362	1.41803	0.208675	0.54278	0.294586	0.294987	1.41803	0.484523	0.802239	0.238107	0.238375	1.41803	0.571099	1	-0.644899	-0.645891	1.41803	0.134617	0.592076	-1.62301	-1.62613	1.41803	0.000702359	0.0282978	1.30607	1.30923	1.41803	0.0048402	0.188702	-0.350313	-0.350904	1.41803	0.410599	0.850456	-1.09031	-1.09276	1.41803	0.0156503	0.122485	0.74	0.741861	1.41803	0.0948186	0.568131	0.955754	0.95833
109552	Sri	sorcin	-0.0790766	-0.0790796	6.78797	0.885808	1	-0.0892443	-0.0892477	6.78797	0.864447	1	0.0101677	0.0101681	6.78797	0.987993	1	-0.332357	-0.332372	6.78797	0.0811085	0.470918	-0.156966	-0.156973	6.78797	0.663514	1	-0.10999	-0.109994	6.78797	0.81498	1	-0.421602	-0.42162	6.78797	0.0108789	0.096641	-0.236043	-0.236052	6.78797	0.348071	0.758034	-0.185559	-0.185567	6.78797	0.552128	1	-0.531592	-0.531614
109593	Lmo3	LIM domain only 3	-0.0654661	-0.0654704	5.83401	0.921328	1	-0.358942	-0.358968	5.83401	0.0434712	0.181222	0.293476	0.293498	5.83401	0.157299	1	-0.157069	-0.157083	5.83401	0.675975	1	-0.552486	-0.552532	5.83401	0.000209882	0.0115499	0.131625	0.131634	5.83401	0.767974	1	-0.516011	-0.516051	5.83401	0.000604214	0.0110548	-0.617952	-0.618002	5.83401	2.65675e-05	0.000924082	0.101941	0.101951	5.83401	0.845196	1	-0.384386	-0.384417
109624	Cald1	caldesmon 1	0.11099	0.111004	5.25927	0.745789	0.988603	0.0209931	0.020996	5.25927	0.958818	1	0.0899968	0.0900081	5.25927	0.802026	1	0.485784	0.485837	5.25927	0.00538124	0.10355	0.156266	0.156284	5.25927	0.60328	1	-0.205483	-0.205508	5.25927	0.43413	1	0.506777	0.506833	5.25927	0.00325281	0.0397134	0.267256	0.267288	5.25927	0.23916	0.641665	0.239521	0.239545	5.25927	0.321285	0.908646	0.301294	0.301325
109648	Npy	neuropeptide Y	-1.01956	-1.01972	4.30356	2.93579e-05	0.000715054	-1.20922	-1.20942	4.30356	2.29738e-06	7.38024e-05	0.189654	0.189699	4.30356	0.446775	1	-0.516319	-0.516475	4.30356	0.0273344	0.271784	-0.971749	-0.972056	4.30356	7.88696e-05	0.00550427	1.14307	1.14326	4.30356	5.47017e-06	0.00192341	-1.72553	-1.7259	4.30356	4.57769e-09	6.32343e-07	-1.99131	-1.99178	4.30356	3.20584e-10	6.73888e-08	0.265776	0.265882	4.30356	0.280535	0.877734	-0.582461	-0.582634
109674	Ampd2	adenosine monophosphate deaminase 2	0.355584	0.355618	5.8502	0.0609549	0.254896	0.641211	0.641267	5.8502	5.73686e-05	0.00111727	-0.285627	-0.285649	5.8502	0.187057	1	-0.0413027	-0.0413056	5.8502	0.932601	1	0.329405	0.32943	5.8502	0.0959231	0.573085	-0.655086	-0.655143	5.8502	3.884e-05	0.00863364	0.599908	0.599961	5.8502	0.000175064	0.00406322	0.684989	0.685048	5.8502	1.72761e-05	0.000658978	-0.0850811	-0.085087	5.8502	0.843944	1	-0.0551774	-0.0551813
109754	Cyb5r3	cytochrome b5 reductase 3	1.16044	1.16046	7.98022	1.06703e-15	1.37569e-12	1.21907	1.21909	7.98022	3.01086e-16	4.15907e-13	-0.0586327	-0.0586334	7.98022	0.995109	1	-0.482149	-0.482156	7.98022	1.68978e-05	0.00196859	-0.5228	-0.522808	7.98022	2.06841e-06	0.000373841	-0.109648	-0.109651	7.98022	0.970547	1	0.73692	0.736937	7.98022	1.4164e-10	2.88334e-08	0.637636	0.637651	7.98022	8.71127e-09	1.05954e-06	0.0992842	0.0992859	7.98022	0.979414	1	0.627273	0.627286
109801	Glo1	glyoxalase 1	-0.314903	-0.314909	7.9418	0.0693043	0.276175	-0.303535	-0.30354	7.9418	0.0957977	0.309546	-0.0113689	-0.0113691	7.9418	0.998204	1	-0.0996422	-0.0996442	7.9418	0.954339	1	-0.0410127	-0.0410135	7.9418	0.99199	1	-0.10512	-0.105122	7.9418	0.947986	1	-0.403177	-0.403184	7.9418	0.00287793	0.0360936	-0.355916	-0.355923	7.9418	0.0179953	0.134835	-0.0472605	-0.0472615	7.9418	0.990101	1	-0.508297	-0.508306
109880	Braf	Braf transforming gene	-0.445363	-0.44543	4.81398	0.014958	0.0978264	-0.592539	-0.592634	4.81398	0.000611924	0.007625	0.147176	0.147204	4.81398	0.617328	1	0.467007	0.467085	4.81398	0.0098674	0.150479	0.280248	0.280293	4.81398	0.207444	0.785953	0.441904	0.441971	4.81398	0.0158353	0.332746	-0.125532	-0.125549	4.81398	0.69318	1	-0.165115	-0.165137	4.81398	0.564707	0.925983	0.0395825	0.0395879	4.81398	0.916013	1	0.316372	0.316422
109889	Mzf1	myeloid zinc finger 1	0.399834	0.399997	3.4974	0.145499	0.441936	0.822338	0.822632	3.4974	0.00362521	0.0298205	-0.422504	-0.422636	3.4974	0.122311	0.984675	-0.30724	-0.307331	3.4974	0.261284	0.781237	-0.73997	-0.740309	3.4974	0.00891066	0.154689	0.120101	0.120158	3.4974	0.665259	1	0.515098	0.515301	3.4974	0.0608464	0.312118	-0.340136	-0.340312	3.4974	0.219141	0.614645	0.855234	0.855614	3.4974	0.00295054	0.0824572	0.635199	0.63546
109901	Cela1	chymotrypsin-like elastase family, member 1	5.00086	5.10097	0.195238	2.29603e-05	0.000584249	4.758	4.85755	0.195238	4.10995e-05	0.000840518	0.242859	0.243426	0.195238	0.745913	1	-0.929251	-0.932579	0.195238	0.231376	0.744523	-0.66071	-0.662499	0.195238	0.384068	0.970329	-2.835	-2.92439	0.195238	0.0062722	0.214687	3.82875	3.92497	0.195238	0.000445789	0.0086994	4.34015	4.43847	0.195238	0.00011535	0.0029943	-0.5114	-0.513506	0.195238	0.505621	1	0.99375	1.00058
109934	Abr	active BCR-related gene	0.132108	0.132115	6.27142	0.847954	1	0.118507	0.118513	6.27142	0.883195	1	0.0136011	0.0136018	6.27142	0.994725	1	-0.168314	-0.168323	6.27142	0.717553	1	-0.533852	-0.533884	6.27142	5.01815e-05	0.0039528	0.192599	0.19261	6.27142	0.604253	1	-0.0498074	-0.0498102	6.27142	0.976379	1	-0.401744	-0.40177	6.27142	0.00658051	0.0660751	0.351937	0.351959	6.27142	0.0318917	0.332771	0.142791	0.1428
110033	Kif22	kinesin family member 22	0.820563	0.820647	5.60966	2.42395e-07	1.34318e-05	0.473345	0.473399	5.60966	0.00363734	0.029885	0.347218	0.347248	5.60966	0.064841	0.814221	-0.0225736	-0.0225757	5.60966	0.968643	1	0.349215	0.349238	5.60966	0.0615184	0.472063	-0.144098	-0.144116	5.60966	0.689384	1	0.450771	0.450823	5.60966	0.00648397	0.0658887	1.16978	1.16988	5.60966	1.33145e-10	3.30243e-08	-0.719007	-0.719062	5.60966	3.41674e-06	0.000833805	0.306673	0.306707
110074	Dut	deoxyuridine triphosphatase	0.438137	0.43818	5.57229	0.026869	0.147871	0.524723	0.524773	5.57229	0.00598129	0.0437324	-0.0865863	-0.0865933	5.57229	0.766752	1	-0.386582	-0.386617	5.57229	0.0587787	0.401807	0.0249847	0.0249868	5.57229	0.934908	1	-0.0608885	-0.0608952	5.57229	0.837805	1	0.138141	0.138156	5.57229	0.612851	0.977489	0.463122	0.463166	5.57229	0.0177022	0.133259	-0.324981	-0.325011	5.57229	0.131522	0.654192	0.0772525	0.0772607
110075	Bmp3	bone morphogenetic protein 3	-1.62395	-1.62831	0.780793	0.00539797	0.0461039	-1.1558	-1.15836	0.780793	0.0369366	0.163381	-0.468148	-0.469949	0.780793	0.393438	1	0.241407	0.242126	0.780793	0.651981	1	0.74006	0.742667	0.780793	0.178919	0.744609	1.38163	1.385	0.780793	0.0146649	0.325661	-0.914392	-0.916236	0.780793	0.0904666	0.399906	-0.883886	-0.885644	0.780793	0.101345	0.400638	-0.030506	-0.0305921	0.780793	0.954115	1	0.467235	0.46876
110078	Pygb	brain glycogen phosphorylase	-0.652409	-0.652415	8.87579	5.26137e-09	5.0123e-07	-0.692134	-0.692141	8.87579	9.84145e-10	1.06326e-07	0.0397253	0.0397258	8.87579	0.997354	1	0.103725	0.103726	8.87579	0.974696	1	0.232334	0.232337	8.87579	0.452079	1	-0.261857	-0.261859	8.87579	0.256842	0.987996	-0.58841	-0.588415	8.87579	9.56976e-08	7.2862e-06	-0.420075	-0.420079	8.87579	0.00047155	0.00927519	-0.168335	-0.168337	8.87579	0.836256	1	-0.850267	-0.850275
110082	Dnah5	dynein, axonemal, heavy chain 5	-0.97901	-0.979878	2.12599	0.00573737	0.0483053	-0.906925	-0.907706	2.12599	0.00981036	0.0634312	-0.0720852	-0.0721718	2.12599	0.830773	1	0.46363	0.46409	2.12599	0.171131	0.658232	-0.43105	-0.431668	2.12599	0.210677	0.79118	1.11143	1.11247	2.12599	0.00204395	0.118347	-0.443296	-0.443617	2.12599	0.183236	0.585235	-1.41006	-1.41155	2.12599	0.000191785	0.00447397	0.966764	0.96793	2.12599	0.00689473	0.136684	0.668134	0.668855
110083	Dnah12	dynein, axonemal, heavy chain 12	-2.15691	-2.15932	2.30516	3.59237e-07	1.86254e-05	-0.950351	-0.950998	2.30516	0.00499854	0.0382687	-1.20656	-1.20832	2.30516	0.000884236	0.0846546	0.703484	0.704002	2.30516	0.0330229	0.298565	0.481748	0.482632	2.30516	0.157099	0.702987	1.98834	1.9904	2.30516	1.13462e-06	0.000645368	-0.246867	-0.246996	2.30516	0.432723	0.869344	-1.67516	-1.67669	2.30516	1.23532e-05	0.000511558	1.42829	1.42969	2.30516	0.000102375	0.00798316	1.74147	1.74341
110095	Pygl	liver glycogen phosphorylase	-0.804336	-0.80449	4.61877	1.70967e-05	0.000463072	-0.543773	-0.543867	4.61877	0.00353917	0.0293122	-0.260564	-0.260623	4.61877	0.259679	1	0.018716	0.0187199	4.61877	0.952277	1	0.478795	0.478897	4.61877	0.0126964	0.192276	-0.0421277	-0.0421336	4.61877	0.894754	1	-0.525057	-0.525147	4.61877	0.00505878	0.0549308	-0.325541	-0.325594	4.61877	0.12663	0.454509	-0.199515	-0.199553	4.61877	0.429216	0.990073	-0.567184	-0.567281
110119	Mpi	mannose phosphate isomerase	0.314652	0.314672	6.23425	0.0960554	0.339663	0.432305	0.432331	6.23425	0.00390869	0.0315222	-0.117652	-0.117659	6.23425	0.850213	1	-0.131063	-0.13107	6.23425	0.812913	1	0.0799302	0.0799346	6.23425	0.926423	1	-0.251352	-0.251369	6.23425	0.29747	1	0.301242	0.301261	6.23425	0.126803	0.482041	0.394582	0.394607	6.23425	0.0123525	0.103503	-0.0933403	-0.0933455	6.23425	0.903944	1	0.0498895	0.0498925
110175	Ggct	gamma-glutamyl cyclotransferase	1.29646	1.29844	1.584	0.00188377	0.0203749	0.619774	0.620953	1.584	0.116106	0.350346	0.676686	0.677491	1.584	0.0828288	0.891181	0.350458	0.350921	1.584	0.364407	0.882584	-0.988636	-0.989961	1.584	0.0137127	0.201206	-0.0452808	-0.045407	1.584	0.908324	1	0.970233	0.971874	1.584	0.0161798	0.127169	0.307825	0.308483	1.584	0.43161	0.83344	0.662408	0.663391	1.584	0.0914084	0.55832	0.924952	0.926467
110196	Fdps	farnesyl diphosphate synthetase	-0.167333	-0.167335	8.0351	0.84597	1	-0.178921	-0.178924	8.0351	0.795729	0.990385	0.0115882	0.0115884	8.0351	0.999488	1	-0.196873	-0.196877	8.0351	0.697318	1	0.0416463	0.041647	8.0351	0.997461	1	-0.272515	-0.272519	8.0351	0.197785	0.920182	-0.375794	-0.375801	8.0351	0.00388446	0.045064	-0.125686	-0.125688	8.0351	0.952871	1	-0.250107	-0.250112	8.0351	0.331016	0.91873	-0.648309	-0.648319
110213	Tmbim6	transmembrane BAX inhibitor motif containing 6	-0.124514	-0.124516	7.72252	0.855318	1	-0.396327	-0.396335	7.72252	0.00915307	0.0601874	0.271813	0.271819	7.72252	0.215119	1	-0.127379	-0.127383	7.72252	0.846048	1	-0.145852	-0.145855	7.72252	0.789688	1	-0.0601913	-0.0601924	7.72252	0.963323	1	-0.523707	-0.523718	7.72252	0.000102163	0.0026273	-0.270366	-0.270371	7.72252	0.220596	0.616753	-0.253341	-0.253347	7.72252	0.291664	0.883894	-0.583898	-0.58391
110257	Hba-a2	hemoglobin alpha, adult chain 2	0.67399	0.674365	3.37808	0.00963611	0.0710711	0.813699	0.814131	3.37808	0.002097	0.0198434	-0.139709	-0.139767	3.37808	0.595864	1	0.0496957	0.0497148	3.37808	0.850762	1	0.401309	0.401462	3.37808	0.118159	0.629722	-0.591833	-0.592169	3.37808	0.0222019	0.389621	0.863395	0.863846	3.37808	0.00119126	0.0186693	1.0753	1.07583	3.37808	0.000107731	0.00283843	-0.211905	-0.21198	3.37808	0.415814	0.982838	0.271562	0.271677
110312	Pmch	pro-melanin-concentrating hormone	-1.38193	-1.65689	0.590907	0.354648	0.722511	-3.32184	-9.31722	0.590907	0.0795251	0.272974	1.93991	7.66032	0.590907	0.316884	1	3.80894	9.85151	0.590907	0.0429518	0.3431	-1.95158	-8.88445	0.590907	0.296841	0.895051	-7.59507	-7.74612	0.590907	2.7843e-08	4.48712e-05	0.487102	0.534297	0.590907	0.670763	1	-3.3335	-10.5413	0.590907	0.0697651	0.323292	3.8206	11.0756	0.590907	0.0368478	0.359173	-7.10797	-7.21182
110350	Dync2h1	dynein cytoplasmic 2 heavy chain 1	-0.928199	-0.928307	5.29618	2.56047e-07	1.40275e-05	-0.574398	-0.574456	5.29618	0.000823502	0.0096286	-0.353802	-0.353851	5.29618	0.0761152	0.867307	0.487432	0.487483	5.29618	0.00595682	0.109713	0.284396	0.284437	5.29618	0.197356	0.773076	0.579891	0.579951	5.29618	0.000714903	0.0604744	-0.0869653	-0.0869728	5.29618	0.807034	1	-0.643803	-0.64387	5.29618	0.000155807	0.00381411	0.556838	0.556898	5.29618	0.00124932	0.0463735	0.492926	0.492978
110355	Grk2	G protein-coupled receptor kinase 2	0.531321	0.531359	5.92491	0.00154683	0.0175842	0.247573	0.247592	5.92491	0.29715	0.619845	0.283748	0.283767	5.92491	0.194928	1	-0.081348	-0.081354	5.92491	0.834031	1	-0.234084	-0.234099	5.92491	0.340918	0.934384	-0.122474	-0.122484	5.92491	0.722323	1	0.166225	0.166238	5.92491	0.578353	0.963542	0.297236	0.297259	5.92491	0.163052	0.524582	-0.131012	-0.131021	5.92491	0.69585	1	0.0437508	0.0437541
110380	Shroom2	shroom family member 2	0.0645287	0.0645338	5.57312	0.833467	1	-0.205687	-0.205705	5.57312	0.41071	0.737485	0.270216	0.270239	5.57312	0.23647	1	0.245575	0.245596	5.57312	0.297767	0.824638	-0.627755	-0.627816	5.57312	0.000711363	0.0283651	0.52782	0.527872	5.57312	0.0050335	0.191364	0.0398876	0.0398908	5.57312	0.898886	1	-0.563227	-0.563283	5.57312	0.0025452	0.0335755	0.603114	0.603174	5.57312	0.00115854	0.044095	0.567707	0.567762
110417	Pigh	phosphatidylinositol glycan anchor biosynthesis, class H	-0.783793	-0.783908	5.00763	2.99807e-05	0.000726477	-0.642826	-0.642915	5.00763	0.000536336	0.00688726	-0.140967	-0.140993	5.00763	0.6044	1	0.156617	0.156643	5.00763	0.558006	1	0.559983	0.560071	5.00763	0.002956	0.0758331	-0.0464525	-0.0464576	5.00763	0.881644	1	-0.486209	-0.486272	5.00763	0.0109638	0.0970384	-0.22381	-0.223837	5.00763	0.357716	0.766512	-0.262399	-0.262436	5.00763	0.255193	0.850735	-0.532661	-0.53273
110446	Acat1	acetyl-Coenzyme A acetyltransferase 1	0.397911	0.397918	8.01748	0.00291115	0.0286508	0.438765	0.438773	8.01748	0.000478561	0.00632596	-0.0408544	-0.0408551	8.01748	0.99379	1	-0.254026	-0.25403	8.01748	0.298536	0.825005	-0.110286	-0.110287	8.01748	0.948305	1	-0.0521935	-0.0521945	8.01748	0.990774	1	0.184739	0.184743	8.01748	0.714389	1	0.287625	0.28763	8.01748	0.141643	0.485078	-0.102886	-0.102888	8.01748	0.957762	1	0.132546	0.132548
110460	Acat2	acetyl-Coenzyme A acetyltransferase 2	-0.0884818	-0.0884831	8.23891	0.980126	1	-0.145941	-0.145943	8.23891	0.894478	1	0.0574592	0.0574601	8.23891	0.9928	1	-0.129102	-0.129104	8.23891	0.932571	1	0.0688166	0.0688176	8.23891	0.989466	1	-0.422393	-0.422398	8.23891	0.000608477	0.0549876	-0.275043	-0.275048	8.23891	0.18877	0.593665	-0.0196652	-0.0196655	8.23891	0.9985	1	-0.255378	-0.255382	8.23891	0.293837	0.885956	-0.697436	-0.697446
110532	Adarb1	adenosine deaminase, RNA-specific, B1	0.57347	0.573929	2.6617	0.072648	0.283883	0.965367	0.966051	2.6617	0.00373913	0.0304211	-0.391897	-0.392121	2.6617	0.210136	1	-0.135851	-0.135922	2.6617	0.660448	1	-0.282848	-0.283054	2.6617	0.367329	0.958765	0.188625	0.188819	2.6617	0.551188	1	0.829516	0.830129	2.6617	0.0115797	0.10109	0.290622	0.290876	2.6617	0.355825	0.765098	0.538894	0.539253	2.6617	0.0886927	0.552231	1.01814	1.01895
110599584	Eef1akmt4-ece2	Eef1akmt4-Ece2 readthrough	-1.53284	-1.53449	1.77944	6.29443e-05	0.0013421	-1.03431	-1.03523	1.77944	0.00337695	0.0282103	-0.498524	-0.499263	1.77944	0.144505	1	-0.683155	-0.684237	1.77944	0.0503477	0.370078	0.00335574	0.0033623	1.77944	0.992051	1	1.92476	1.9272	1.77944	3.09533e-06	0.00136047	-1.71747	-1.71947	1.77944	1.48231e-05	0.000531844	-1.52948	-1.53113	1.77944	6.26091e-05	0.00184573	-0.187987	-0.188337	1.77944	0.579675	1	0.20729	0.207737
110616	Atxn3	ataxin 3	-0.292734	-0.292827	3.86814	0.272664	0.627446	-0.159554	-0.1596	3.86814	0.552284	0.856368	-0.13318	-0.133226	3.86814	0.621814	1	1.08913	1.08938	3.86814	0.000139492	0.00864624	-0.132114	-0.132163	3.86814	0.625299	1	0.624682	0.624907	3.86814	0.0192955	0.367954	0.92958	0.92978	3.86814	0.000760042	0.0133138	-0.424848	-0.424989	3.86814	0.109754	0.419308	1.35443	1.35477	3.86814	7.31186e-06	0.0013093	1.55426	1.55469
110639	Prps2	phosphoribosyl pyrophosphate synthetase 2	0.44278	0.442832	5.33236	0.0100232	0.0731466	0.427815	0.427865	5.33236	0.0141804	0.0828253	0.0149651	0.0149666	5.33236	0.975824	1	-0.121141	-0.121154	5.33236	0.743688	1	0.0354402	0.0354438	5.33236	0.941869	1	-0.253037	-0.253068	5.33236	0.281387	1	0.306674	0.306712	5.33236	0.138583	0.50529	0.47822	0.478276	5.33236	0.00429218	0.0487128	-0.171546	-0.171564	5.33236	0.57563	1	0.0536373	0.0536435
110695	Aldh7a1	aldehyde dehydrogenase family 7, member A1	-0.467142	-0.467177	5.7113	0.00267122	0.0267246	-0.57446	-0.574506	5.7113	0.0001062	0.00186202	0.107318	0.107328	5.7113	0.829874	1	-0.256928	-0.256955	5.7113	0.2713	0.795431	-0.126785	-0.126796	5.7113	0.776156	1	-0.0126081	-0.0126089	5.7113	0.987186	1	-0.831387	-0.83146	5.7113	5.67826e-08	4.81631e-06	-0.593926	-0.593974	5.7113	5.72181e-05	0.0017209	-0.237461	-0.237487	5.7113	0.34457	0.931336	-0.843996	-0.844069
110749	Chaf1b	chromatin assembly factor 1, subunit B (p60)	0.383587	0.383637	5.15093	0.0355605	0.179276	0.306353	0.306394	5.15093	0.139015	0.394059	0.0772345	0.0772435	5.15093	0.859453	1	-0.118484	-0.118499	5.15093	0.751792	1	0.18272	0.18274	5.15093	0.535415	1	-0.0292602	-0.0292645	5.15093	0.952075	1	0.187869	0.187895	5.15093	0.514465	0.927668	0.566307	0.566377	5.15093	0.000426979	0.00850792	-0.378439	-0.378482	5.15093	0.0391837	0.370959	0.158609	0.15863
110796	Tshz1	teashirt zinc finger family member 1	-0.317571	-0.317593	5.866	0.112651	0.376328	-0.222281	-0.222296	5.866	0.393383	0.722541	-0.0952899	-0.0952968	5.866	0.828379	1	-0.477766	-0.477806	5.866	0.00359526	0.0820883	-0.364773	-0.364804	5.866	0.0481594	0.413751	0.169094	0.169105	5.866	0.598688	1	-0.700048	-0.700102	5.866	7.73917e-06	0.00030929	-0.682344	-0.682396	5.866	1.24757e-05	0.000512247	-0.0177037	-0.0177055	5.866	0.97383	1	-0.530953	-0.530997
110809	Srsf1	serine/arginine-rich splicing factor 1	-0.00520542	-0.0052055	8.17111	0.996046	1	-0.135125	-0.135127	8.17111	0.784018	0.985773	0.12992	0.129922	8.17111	0.799826	1	0.613184	0.613193	8.17111	1.30996e-05	0.00166667	0.0204905	0.0204909	8.17111	0.984057	1	0.209477	0.209481	8.17111	0.48048	1	0.478059	0.478066	8.17111	0.00115393	0.0182086	0.0152851	0.0152854	8.17111	0.988284	1	0.462774	0.46278	8.17111	0.0018807	0.0615411	0.687537	0.687547
110826	Etfb	electron transferring flavoprotein, beta polypeptide	-0.244521	-0.244528	7.23458	0.314901	0.679085	-0.239706	-0.239713	7.23458	0.332861	0.660015	-0.00481518	-0.00481532	7.23458	0.99407	1	-0.228031	-0.228039	7.23458	0.377251	0.892715	0.125028	0.125032	7.23458	0.765729	1	-0.0940392	-0.0940416	7.23458	0.849842	1	-0.467737	-0.467752	7.23458	0.0034652	0.0416492	-0.119493	-0.119496	7.23458	0.783229	1	-0.348244	-0.348255	7.23458	0.06059	0.457826	-0.561776	-0.561793
110862	Kcnq3	potassium voltage-gated channel, subfamily Q, member 3	0.330857	0.330914	4.7673	0.285634	0.643814	0.84677	0.846894	4.7673	0.00929727	0.0608666	-0.515914	-0.51598	4.7673	0.0982526	0.939226	-0.366726	-0.366771	4.7673	0.233586	0.747208	0.0263144	0.0263191	4.7673	0.931823	1	0.456817	0.45692	4.7673	0.146668	0.839377	0.480044	0.480124	4.7673	0.122147	0.471949	0.357171	0.357233	4.7673	0.248864	0.651896	0.122873	0.122891	4.7673	0.688285	1	0.936861	0.937044
110876	Scn2a	sodium channel, voltage-gated, type II, alpha	-0.0434467	-0.0434632	3.57181	0.875207	1	0.110702	0.11074	3.57181	0.688462	0.943279	-0.154148	-0.154203	3.57181	0.577599	1	0.284724	0.284811	3.57181	0.29896	0.825239	-0.268322	-0.268432	3.57181	0.332387	0.928558	0.622834	0.623117	3.57181	0.0255296	0.413661	0.395426	0.395551	3.57181	0.147041	0.522089	-0.311768	-0.311896	3.57181	0.257565	0.663078	0.707194	0.707446	3.57181	0.0113157	0.182513	1.01826	1.01867
110877	Slc18a1	solute carrier family 18 (vesicular monoamine), member 1	-0.759529	-0.760462	1.48506	0.0526248	0.231621	-0.410858	-0.4113	1.48506	0.284326	0.604605	-0.348671	-0.349162	1.48506	0.368358	1	-0.776937	-0.778214	1.48506	0.0505162	0.370189	-0.606955	-0.608155	1.48506	0.125841	0.647419	1.72227	1.72537	1.48506	0.000112283	0.0182473	-1.18779	-1.18951	1.48506	0.00379446	0.0444465	-1.36648	-1.36862	1.48506	0.00118096	0.0186743	0.17869	0.179104	1.48506	0.649896	1	0.534478	0.535854
110886	Gabra5	gamma-aminobutyric acid (GABA) A receptor, subunit alpha 5	1.33115	1.33225	2.6905	0.00105425	0.013221	1.2922	1.29328	2.6905	0.00140088	0.0145341	0.0389461	0.0389658	2.6905	0.914985	1	-0.244128	-0.244265	2.6905	0.506435	0.983229	-0.425101	-0.425348	2.6905	0.25231	0.84695	-0.190966	-0.19118	2.6905	0.614919	1	1.04807	1.04902	2.6905	0.0077195	0.0750565	0.906048	0.906899	2.6905	0.0197068	0.143382	0.142026	0.142117	2.6905	0.699327	1	0.857108	0.857835
110956	D17H6S56E-5	DNA segment, Chr 17, human D6S56E 5	0.478686	0.478739	5.38857	0.00582562	0.0488347	0.204526	0.204551	5.38857	0.439419	0.764004	0.27416	0.274189	5.38857	0.22028	1	0.186156	0.186176	5.38857	0.50424	0.981928	0.173457	0.173472	5.38857	0.550951	1	-0.0569482	-0.0569557	5.38857	0.886821	1	0.390682	0.390727	5.38857	0.0362543	0.22277	0.652143	0.652212	5.38857	8.28855e-05	0.00229975	-0.261461	-0.261485	5.38857	0.255226	0.850735	0.333734	0.333771
111175	Pecr	peroxisomal trans-2-enoyl-CoA reductase	0.106181	0.10622	3.59865	0.676049	0.954499	0.0352198	0.0352333	3.59865	0.89085	1	0.0709608	0.0709866	3.59865	0.781335	1	-0.293402	-0.293524	3.59865	0.226728	0.739656	-0.0446329	-0.0446484	3.59865	0.861818	1	-0.408384	-0.40852	3.59865	0.0813502	0.684265	-0.258182	-0.258291	3.59865	0.291199	0.737235	0.0615477	0.0615715	3.59865	0.809963	1	-0.31973	-0.319862	3.59865	0.184398	0.757611	-0.666566	-0.666811
111241	Hmga1b	high mobility group AT-hook 1B	0.559869	0.559927	5.46876	0.00144551	0.0167093	0.45917	0.459219	5.46876	0.0122181	0.0742339	0.100699	0.100708	5.46876	0.757885	1	-0.239017	-0.239041	5.46876	0.31907	0.848946	-0.141973	-0.141986	5.46876	0.633703	1	-0.272006	-0.272037	5.46876	0.228401	0.956722	0.220153	0.220179	5.46876	0.376706	0.822341	0.417895	0.417941	5.46876	0.0266558	0.175578	-0.197742	-0.197762	5.46876	0.449311	0.999436	-0.0518527	-0.0518583
111368	Prn	prion protein readthrough transcript	-0.83057	-0.831238	1.91731	0.0218949	0.128311	-1.02039	-1.02127	1.91731	0.00583844	0.0429968	0.18982	0.190036	1.91731	0.589844	1	-0.276805	-0.277174	1.91731	0.436022	0.939617	-1.70441	-1.70783	1.91731	6.07118e-05	0.00456851	1.68792	1.68984	1.91731	4.11932e-05	0.00895096	-1.2972	-1.29845	1.91731	0.000743197	0.0131018	-2.53498	-2.53906	1.91731	1.80078e-07	1.39861e-05	1.23778	1.24062	1.91731	0.00192798	0.0626689	0.390727	0.391395
111970	Dlx1as	distal-less homeobox 1, antisense	-0.203364	-0.203394	4.83279	0.411444	0.775596	0.0216259	0.0216288	4.83279	0.941478	1	-0.22499	-0.225023	4.83279	0.351063	1	0.160027	0.160048	4.83279	0.539837	0.998366	-0.281746	-0.281796	4.83279	0.214943	0.796624	0.677173	0.677293	4.83279	0.000440672	0.045573	0.181653	0.181676	4.83279	0.475596	0.900132	-0.485111	-0.48519	4.83279	0.0142278	0.11479	0.666764	0.666867	4.83279	0.000528422	0.0250432	0.858826	0.858969
112406	Egln2	egl-9 family hypoxia-inducible factor 2	0.198977	0.198982	7.61192	0.432141	0.794785	0.720257	0.720272	7.61192	0.00311056	0.0264186	-0.52128	-0.52129	7.61192	0.0313714	0.654761	-0.57749	-0.577501	7.61192	0.0169847	0.20925	0.19543	0.195434	7.61192	0.440652	1	-0.174877	-0.174881	7.61192	0.491693	1	0.142767	0.142771	7.61192	0.576555	0.962937	0.394407	0.394416	7.61192	0.107312	0.41433	-0.251639	-0.251645	7.61192	0.315871	0.903511	-0.0321095	-0.0321103
112407	Egln3	egl-9 family hypoxia-inducible factor 3	-0.625202	-0.625243	6.26582	8.88279e-05	0.00177831	-0.618118	-0.618158	6.26582	0.000107397	0.0018796	-0.00708448	-0.00708502	6.26582	0.988503	1	0.476989	0.477022	6.26582	0.0044004	0.0922706	0.714247	0.714292	6.26582	8.24474e-06	0.00104212	-0.314768	-0.314783	6.26582	0.120807	0.784954	-0.141128	-0.141136	6.26582	0.685101	1	0.0890447	0.0890492	6.26582	0.835704	1	-0.230173	-0.230185	6.26582	0.359852	0.94234	-0.455896	-0.455919
11303	Abca1	ATP-binding cassette, sub-family A (ABC1), member 1	-0.575449	-0.575459	7.84676	1.95432e-06	7.74478e-05	-0.993067	-0.993088	7.84676	2.31231e-12	6.98715e-10	0.417618	0.417629	7.84676	0.00183646	0.140933	0.624743	0.624759	7.84676	2.63329e-07	0.000106211	0.211756	0.21176	7.84676	0.541112	1	0.0365754	0.0365759	7.84676	0.992472	1	-0.368323	-0.368329	7.84676	0.0122389	0.105054	-0.363693	-0.363699	7.84676	0.0144784	0.116107	-0.00463024	-0.00463033	7.84676	0.999189	1	-0.331748	-0.331754
11306	Abcb7	ATP-binding cassette, sub-family B (MDR/TAP), member 7	0.0720683	0.0720869	4.14012	0.781884	1	0.031569	0.0315772	4.14012	0.9037	1	0.0404994	0.0405097	4.14012	0.876716	1	0.47523	0.475334	4.14012	0.0558524	0.390737	-0.151721	-0.151762	4.14012	0.557578	1	0.27871	0.27879	4.14012	0.27366	1	0.506799	0.506911	4.14012	0.0404335	0.240229	-0.0796532	-0.0796747	4.14012	0.759399	1	0.586452	0.586586	4.14012	0.017907	0.238099	0.785509	0.785701
11307	Abcg1	ATP binding cassette subfamily G member 1	0.884126	0.884407	3.78704	0.000142251	0.00258854	0.5425	0.542692	3.78704	0.0167875	0.093792	0.341627	0.341715	3.78704	0.1459	1	-0.209095	-0.209161	3.78704	0.395602	0.904641	-0.50935	-0.50949	3.78704	0.0246015	0.280182	-0.134824	-0.134879	3.78704	0.592755	1	0.333405	0.333531	3.78704	0.158644	0.542675	0.374777	0.374917	3.78704	0.108712	0.416727	-0.041372	-0.0413861	3.78704	0.871986	1	0.198581	0.198653
11363	Acadl	acyl-Coenzyme A dehydrogenase, long-chain	-0.302865	-0.302873	7.34202	0.109193	0.368724	-0.306668	-0.306677	7.34202	0.0996425	0.31767	0.00380366	0.00380377	7.34202	0.998791	1	-0.0718068	-0.071809	7.34202	0.963457	1	0.288515	0.288523	7.34202	0.151332	0.695819	-0.14623	-0.146234	7.34202	0.817824	1	-0.378475	-0.378486	7.34202	0.012273	0.105254	-0.0143499	-0.0143502	7.34202	0.995483	1	-0.364125	-0.364135	7.34202	0.0196647	0.253699	-0.524706	-0.52472
11364	Acadm	acyl-Coenzyme A dehydrogenase, medium chain	-0.521369	-0.521397	6.36133	0.000319434	0.00509698	-0.496861	-0.496887	6.36133	0.000705038	0.00850046	-0.024509	-0.0245105	6.36133	0.97899	1	-0.0941661	-0.0941722	6.36133	0.883036	1	0.169971	0.169982	6.36133	0.64886	1	-0.19305	-0.193058	6.36133	0.553361	1	-0.591027	-0.591059	6.36133	3.21363e-05	0.00102895	-0.351398	-0.351416	6.36133	0.045353	0.245888	-0.239628	-0.239643	6.36133	0.342808	0.930203	-0.784077	-0.784117
11370	Acadvl	acyl-Coenzyme A dehydrogenase, very long chain	0.00311473	0.00311482	7.23301	0.999452	1	-0.0156346	-0.0156351	7.23301	0.997156	1	0.0187493	0.0187499	7.23301	0.996497	1	-0.187604	-0.18761	7.23301	0.675817	1	0.142459	0.142463	7.23301	0.862715	1	-0.212648	-0.212654	7.23301	0.53634	1	-0.203239	-0.203245	7.23301	0.59057	0.968225	0.145574	0.145578	7.23301	0.853886	1	-0.348813	-0.348823	7.23301	0.0247155	0.288283	-0.415887	-0.415899
113868	Acaa1a	acetyl-Coenzyme A acyltransferase 1A	-0.243586	-0.243597	6.6153	0.309747	0.673206	-0.244263	-0.244274	6.6153	0.307609	0.631373	0.000677162	0.000677202	6.6153	0.99876	1	-0.110036	-0.110042	6.6153	0.756888	1	0.175522	0.17553	6.6153	0.545128	1	-0.262852	-0.262862	6.6153	0.251198	0.98239	-0.354299	-0.354316	6.6153	0.0680712	0.334712	-0.0680638	-0.0680667	6.6153	0.8665	1	-0.286235	-0.286249	6.6153	0.189113	0.765598	-0.617151	-0.617178
11409	Acads	acyl-Coenzyme A dehydrogenase, short chain	-0.0977752	-0.0977921	4.66699	0.728409	0.981072	-0.197061	-0.197096	4.66699	0.43049	0.756221	0.0992858	0.0993044	4.66699	0.722271	1	-0.301611	-0.301676	4.66699	0.175737	0.664514	0.127147	0.127169	4.66699	0.640379	1	-0.338447	-0.338498	4.66699	0.113848	0.773614	-0.498672	-0.498772	4.66699	0.0111313	0.0980725	0.0293719	0.029377	4.66699	0.921282	1	-0.528044	-0.528149	4.66699	0.0067903	0.135799	-0.83712	-0.837271
114128	Laptm4b	lysosomal-associated protein transmembrane 4B	0.535462	0.535519	5.3559	0.000726162	0.0098342	0.270089	0.270121	5.3559	0.228539	0.537286	0.265373	0.265399	5.3559	0.242898	1	-0.182213	-0.182234	5.3559	0.546602	1	-0.116347	-0.116358	5.3559	0.775382	1	-0.0491519	-0.049158	5.3559	0.924753	1	0.087876	0.0878868	5.3559	0.846959	1	0.419115	0.419161	5.3559	0.0144541	0.116083	-0.331239	-0.331274	5.3559	0.0891834	0.552938	0.0387241	0.0387288
114142	Foxp2	forkhead box P2	-1.80016	-1.80215	2.15315	1.12894e-06	4.89519e-05	-0.612202	-0.612627	2.15315	0.0398311	0.171367	-1.18796	-1.18952	2.15315	0.000350443	0.0454847	-0.365457	-0.36581	2.15315	0.217979	0.726184	0.346019	0.346616	2.15315	0.256995	0.852786	0.968973	0.96974	2.15315	0.00203398	0.118124	-0.977659	-0.978437	2.15315	0.00184893	0.0259663	-1.45414	-1.45553	2.15315	2.13884e-05	0.000780436	0.476479	0.477092	2.15315	0.113302	0.610372	-0.00868616	-0.00869674
11419	Asic1	acid-sensing (proton-gated) ion channel 1	0.577997	0.578065	5.3139	0.000836183	0.011076	0.707229	0.707309	5.3139	3.87808e-05	0.000799554	-0.129232	-0.129244	5.3139	0.680275	1	-0.174112	-0.174129	5.3139	0.533882	0.99688	-0.179703	-0.179721	5.3139	0.514342	1	0.0753238	0.075335	5.3139	0.828897	1	0.533117	0.533181	5.3139	0.00232012	0.0305645	0.398294	0.398344	5.3139	0.0361062	0.212753	0.134823	0.134837	5.3139	0.662173	1	0.608441	0.608516
114249	Npnt	nephronectin	-0.0734511	-0.0734657	4.71761	0.812794	1	0.268954	0.269001	4.71761	0.238231	0.550304	-0.342405	-0.342467	4.71761	0.101236	0.945639	0.26883	0.268869	4.71761	0.238431	0.75368	0.499328	0.499414	4.71761	0.00767805	0.140707	-0.0201879	-0.0201921	4.71761	0.950582	1	0.537783	0.537871	4.71761	0.00345961	0.0416078	0.425877	0.425949	4.71761	0.0280165	0.180968	0.111906	0.111922	4.71761	0.707067	1	0.517595	0.517678
114255	Dok4	docking protein 4	0.77131	0.771365	6.10208	3.52391e-07	1.83604e-05	0.840768	0.840826	6.10208	5.30867e-08	3.00188e-06	-0.0694573	-0.0694609	6.10208	0.909729	1	-0.129939	-0.129946	6.10208	0.764959	1	-0.40921	-0.409235	6.10208	0.0138206	0.20187	-0.242818	-0.242839	6.10208	0.323082	1	0.710829	0.71088	6.10208	2.02074e-06	9.86847e-05	0.362101	0.36213	6.10208	0.0426292	0.236964	0.348728	0.34875	6.10208	0.0564698	0.445505	0.46801	0.468041
11426	Macf1	microtubule-actin crosslinking factor 1	-0.490007	-0.490021	7.2048	0.000498192	0.00725491	-0.56669	-0.566706	7.2048	3.29633e-05	0.000702067	0.0766825	0.0766851	7.2048	0.934852	1	0.133681	0.133686	7.2048	0.811487	1	0.240461	0.240468	7.2048	0.34697	0.939784	0.242975	0.242981	7.2048	0.335855	1	-0.433008	-0.43302	7.2048	0.00342204	0.0413424	-0.249547	-0.249553	7.2048	0.306499	0.718721	-0.183462	-0.183467	7.2048	0.619636	1	-0.190033	-0.190039
11428	Aco1	aconitase 1	-0.0653332	-0.0653363	6.51378	0.93564	1	-0.0671449	-0.0671481	6.51378	0.933038	1	0.00181172	0.0018118	6.51378	0.998554	1	-0.318554	-0.318571	6.51378	0.0941327	0.50122	-0.0612749	-0.0612779	6.51378	0.940538	1	-0.176365	-0.176373	6.51378	0.626927	1	-0.385699	-0.385719	6.51378	0.0191344	0.14349	-0.126608	-0.126614	6.51378	0.807028	1	-0.25909	-0.259105	6.51378	0.264749	0.861515	-0.562064	-0.562092
11429	Aco2	aconitase 2, mitochondrial	0.53153	0.531542	7.63119	2.37664e-05	0.000602905	0.448151	0.448161	7.63119	0.000741075	0.00881948	0.083379	0.0833806	7.63119	0.959366	1	-0.194199	-0.194203	7.63119	0.622296	1	-0.111051	-0.111053	7.63119	0.920705	1	-0.132324	-0.132327	7.63119	0.872794	1	0.253952	0.253958	7.63119	0.293689	0.738961	0.420479	0.420489	7.63119	0.00221275	0.0303011	-0.166527	-0.166531	7.63119	0.755416	1	0.121628	0.121631
11430	Acox1	acyl-Coenzyme A oxidase 1, palmitoyl	-0.316902	-0.316909	7.65136	0.0747794	0.28987	-0.302864	-0.30287	7.65136	0.106964	0.33289	-0.0140385	-0.0140388	7.65136	0.996011	1	-0.238951	-0.238957	7.65136	0.369932	0.887698	-0.0665531	-0.0665546	7.65136	0.971264	1	-0.0855602	-0.0855618	7.65136	0.954085	1	-0.541815	-0.541827	7.65136	1.90327e-05	0.000653772	-0.383455	-0.383464	7.65136	0.00949068	0.0859639	-0.158359	-0.158364	7.65136	0.78052	1	-0.627375	-0.627389
114301	Palmd	palmdelphin	0.731011	0.731203	4.26086	0.000849821	0.0111953	0.527232	0.52738	4.26086	0.0166252	0.0931119	0.203779	0.203823	4.26086	0.405263	1	0.438828	0.438916	4.26086	0.048809	0.363542	-0.0578691	-0.057881	4.26086	0.823025	1	-0.162056	-0.162107	4.26086	0.515956	1	0.96606	0.966296	4.26086	2.41181e-05	0.000804173	0.673142	0.673322	4.26086	0.00202994	0.0284626	0.292919	0.292974	4.26086	0.211502	0.795397	0.804004	0.804189
11433	Acp5	acid phosphatase 5, tartrate resistant	1.82345	1.83098	0.74988	0.00592738	0.0494005	2.26002	2.26832	0.74988	0.00105402	0.0116479	-0.436573	-0.437347	0.74988	0.458805	1	-1.04417	-1.04651	0.74988	0.0877529	0.485603	0.140114	0.140383	0.74988	0.811308	1	-0.412762	-0.415188	0.74988	0.50813	1	1.21585	1.22182	0.74988	0.0557585	0.294336	1.96356	1.97136	0.74988	0.00337749	0.0410027	-0.747711	-0.749542	0.74988	0.214554	0.800153	0.80309	0.806629
114332	Lyve1	lymphatic vessel endothelial hyaluronan receptor 1	-0.325009	-0.326093	0.502579	0.573991	0.898456	-0.775319	-0.778408	0.502579	0.191199	0.482967	0.45031	0.452315	0.502579	0.446596	1	1.11284	1.11684	0.502579	0.065628	0.42629	1.06997	1.0728	0.502579	0.0721032	0.505769	2.32336	2.34094	0.502579	0.00095915	0.0721217	0.337522	0.338429	0.502579	0.555143	0.952526	0.744958	0.746709	0.502579	0.197549	0.5822	-0.407436	-0.40828	0.502579	0.47495	1	2.66089	2.67937
11438	Chrna4	cholinergic receptor, nicotinic, alpha polypeptide 4	0.96395	0.964496	3.00399	0.00173728	0.0191437	0.985743	0.986298	3.00399	0.00139942	0.0145268	-0.0217932	-0.0218017	3.00399	0.939487	1	-0.246384	-0.246489	3.00399	0.39087	0.902545	-0.617726	-0.618031	3.00399	0.0344285	0.339874	0.6542	0.65484	3.00399	0.0298542	0.445142	0.739359	0.739809	3.00399	0.0129053	0.108795	0.346224	0.346465	3.00399	0.232685	0.631741	0.393136	0.393343	3.00399	0.173712	0.740898	1.39356	1.39465
11441	Chrna7	cholinergic receptor, nicotinic, alpha polypeptide 7	0.581148	0.581812	2.36358	0.0710907	0.279953	0.951467	0.952431	2.36358	0.00444954	0.0349086	-0.370318	-0.370619	2.36358	0.239094	1	0.17032	0.170435	2.36358	0.583445	1	0.0290022	0.0290305	2.36358	0.926206	1	-0.587802	-0.588473	2.36358	0.0674815	0.639405	1.12179	1.12287	2.36358	0.00101324	0.0165639	0.61015	0.610843	2.36358	0.0579791	0.287857	0.511637	0.512024	2.36358	0.105019	0.592289	0.533985	0.534394
11444	Chrnb2	cholinergic receptor, nicotinic, beta polypeptide 2 (neuronal)	0.387679	0.387756	4.52808	0.0748508	0.289914	0.335517	0.335584	4.52808	0.133509	0.383418	0.0521621	0.0521713	4.52808	0.845537	1	0.031505	0.0315106	4.52808	0.906881	1	0.105613	0.10563	4.52808	0.686606	1	0.230077	0.230134	4.52808	0.337419	1	0.367022	0.367095	4.52808	0.0948623	0.410661	0.493291	0.493386	4.52808	0.0183077	0.136489	-0.12627	-0.126291	4.52808	0.625295	1	0.597099	0.597229
114601	Ehbp1l1	EH domain binding protein 1-like 1	0.565095	0.565329	3.64461	0.0174193	0.109409	1.26232	1.26274	3.64461	2.24531e-06	7.25536e-05	-0.697224	-0.69741	3.64461	0.00323003	0.19886	-0.784756	-0.784973	3.64461	0.00103697	0.0359661	0.0252026	0.025211	3.64461	0.92192	1	0.154588	0.154669	3.64461	0.542981	1	0.477563	0.477766	3.64461	0.0456613	0.259795	0.590297	0.59054	3.64461	0.0127742	0.106047	-0.112735	-0.112774	3.64461	0.658294	1	0.63215	0.632435
114602	Zmynd10	zinc finger, MYND domain containing 10	-0.527078	-0.527147	5.32018	0.0016296	0.0182483	0.543954	0.544003	5.32018	0.000961649	0.0108469	-1.07103	-1.07115	5.32018	5.52269e-09	1.5941e-05	-0.25437	-0.25439	5.32018	0.276728	0.801505	0.167345	0.16737	5.32018	0.57533	1	0.47579	0.475851	5.32018	0.00546589	0.199067	0.289585	0.289613	5.32018	0.179189	0.578012	-0.359733	-0.359777	5.32018	0.0601225	0.295855	0.649317	0.64939	5.32018	6.95795e-05	0.00590175	0.765375	0.765464
114606	Tle6	transducin-like enhancer of split 6	2.408	2.42674	0.0646131	0.00750028	0.0592042	2.64659	2.66599	0.0646131	0.00387418	0.0313222	-0.238592	-0.23925	0.0646131	0.75738	1	-0.632041	-0.634048	0.0646131	0.419107	0.925164	-0.615193	-0.617478	0.0646131	0.433154	0.998607	-0.673406	-0.681862	0.0646131	0.425585	1	2.01455	2.03194	0.0646131	0.0217052	0.156392	1.79281	1.80926	0.0646131	0.0382622	0.220618	0.221744	0.22268	0.0646131	0.77692	1	1.34115	1.35008
11461	Actb	actin, beta	0.46114	0.46114	12.2636	8.35216e-06	0.000257611	0.785753	0.785754	12.2636	9.85121e-13	3.34233e-10	-0.324613	-0.324613	12.2636	0.0238626	0.584456	0.123496	0.123496	12.2636	0.979622	1	0.0619281	0.0619281	12.2636	0.998417	1	0.0183963	0.0183964	12.2636	0.999804	1	0.909249	0.90925	12.2636	2.16909e-14	1.85011e-11	0.523068	0.523069	12.2636	2.115e-07	1.6095e-05	0.386181	0.386182	12.2636	0.000818755	0.0353435	0.927646	0.927647
114641	Rpl31	ribosomal protein L31	0.357229	0.357254	6.0339	0.0670238	0.270752	0.500525	0.500559	6.0339	0.00372449	0.0303787	-0.143296	-0.143305	6.0339	0.64917	1	-0.319668	-0.319688	6.0339	0.120716	0.565535	0.0506743	0.0506774	6.0339	0.899243	1	-0.121077	-0.121087	6.0339	0.717928	1	0.180857	0.180871	6.0339	0.520829	0.930897	0.407903	0.407932	6.0339	0.0267484	0.175816	-0.227046	-0.227061	6.0339	0.361785	0.945015	0.0597794	0.0597838
114644	Slc13a3	solute carrier family 13 (sodium-dependent dicarboxylate transporter), member 3	-0.126572	-0.126582	5.50975	0.750765	0.991487	-0.415206	-0.415244	5.50975	0.0150841	0.08651	0.288635	0.288662	5.50975	0.176185	1	-0.464726	-0.464784	5.50975	0.00481713	0.0966555	-0.616028	-0.616094	5.50975	7.29872e-05	0.00526679	-0.140027	-0.140037	5.50975	0.709175	1	-0.879933	-0.880029	5.50975	6.1969e-08	5.12642e-06	-0.742599	-0.742676	5.50975	1.98055e-06	0.000107728	-0.137333	-0.137352	5.50975	0.707806	1	-1.01996	-1.02007
11465	Actg1	actin, gamma, cytoplasmic 1	0.483349	0.48335	11.635	6.29573e-10	9.01875e-08	0.498983	0.498984	11.635	1.81381e-10	2.52354e-08	-0.0156341	-0.0156341	11.635	1	1	-0.194102	-0.194102	11.635	0.949917	1	-0.0601846	-0.0601847	11.635	0.999995	1	-0.0974881	-0.0974883	11.635	0.999939	1	0.304881	0.304882	11.635	0.015565	0.123466	0.423165	0.423165	11.635	1.27045e-07	1.05448e-05	-0.118283	-0.118284	11.635	0.999735	1	0.207393	0.207393
114663	Impa2	inositol (myo)-1(or 4)-monophosphatase 2	1.1038	1.10533	1.92589	0.00463083	0.041175	1.05584	1.05733	1.92589	0.00646609	0.0465208	0.0479551	0.0480002	1.92589	0.894227	1	-0.351835	-0.352214	1.92589	0.336461	0.863339	-0.189198	-0.189379	1.92589	0.600613	1	-0.498035	-0.498868	1.92589	0.183923	0.901618	0.704007	0.705115	1.92589	0.0623998	0.316483	0.914599	0.91595	1.92589	0.0166684	0.127512	-0.210592	-0.210835	1.92589	0.562464	1	0.205972	0.206247
114713	Rasa2	RAS p21 protein activator 2	-0.422976	-0.423026	5.1088	0.0325914	0.169174	-0.522434	-0.522499	5.1088	0.00581507	0.0429064	0.0994586	0.0994727	5.1088	0.730367	1	0.249595	0.249629	5.1088	0.287219	0.812956	-0.100129	-0.100143	5.1088	0.729077	1	0.270803	0.270834	5.1088	0.235059	0.966788	-0.272839	-0.27287	5.1088	0.230275	0.65749	-0.523105	-0.523169	5.1088	0.00565959	0.0596439	0.250266	0.250299	5.1088	0.285498	0.880896	-0.00203576	-0.00203602
114714	Rad51c	RAD51 paralog C	0.647018	0.647579	2.8082	0.0542251	0.236025	0.989952	0.990714	2.8082	0.00436651	0.0343129	-0.342935	-0.343134	2.8082	0.286128	1	-0.433104	-0.433365	2.8082	0.179369	0.669142	0.519493	0.51978	2.8082	0.109008	0.605081	-0.549389	-0.549885	2.8082	0.0991618	0.740772	0.556848	0.557349	2.8082	0.0940323	0.409473	1.16651	1.16736	2.8082	0.000997075	0.0164948	-0.609663	-0.61001	2.8082	0.0617822	0.460563	0.0074593	0.00746416
114715	Spred1	sprouty protein with EVH-1 domain 1, related sequence	-0.519958	-0.519974	7.0285	0.000386494	0.00593207	-0.786728	-0.786756	7.0285	9.20582e-08	4.82645e-06	0.26677	0.266781	7.0285	0.236781	1	0.274679	0.27469	7.0285	0.209985	0.715509	-0.0297666	-0.0297677	7.0285	0.972675	1	-0.0326292	-0.0326301	7.0285	0.970593	1	-0.51205	-0.512066	7.0285	0.000490435	0.00938133	-0.549725	-0.549742	7.0285	0.000146963	0.00361594	0.0376748	0.0376762	7.0285	0.964711	1	-0.544679	-0.544696
114716	Spred2	sprouty-related, EVH1 domain containing 2	-0.11387	-0.113901	4.14529	0.653864	0.94401	-0.25147	-0.251543	4.14529	0.295019	0.617198	0.137601	0.137642	4.14529	0.584666	1	0.780176	0.780365	4.14529	0.000448997	0.019382	0.172338	0.172385	4.14529	0.487955	1	-0.250665	-0.250726	4.14529	0.295971	1	0.528706	0.528822	4.14529	0.0162063	0.127248	0.0584683	0.0584835	4.14529	0.82069	1	0.470237	0.470339	4.14529	0.034804	0.346411	0.27804	0.278097
11475	Acta2	actin, alpha 2, smooth muscle, aorta	1.8342	1.83435	6.20819	8.05935e-15	7.42189e-12	1.70889	1.70903	6.20819	3.98432e-14	2.56842e-11	0.125309	0.125314	6.20819	0.751954	1	-0.591752	-0.591783	6.20819	0.000146691	0.00892634	-0.285428	-0.28544	6.20819	0.184599	0.752194	0.237982	0.238018	6.20819	0.331986	1	1.11714	1.11725	6.20819	6.52608e-10	1.16859e-07	1.54877	1.54891	6.20819	3.73e-13	2.00373e-10	-0.431632	-0.431656	6.20819	0.0106288	0.176741	1.35512	1.35527
114774	Pawr	PRKC, apoptosis, WT1, regulator	-0.923368	-0.923537	4.7654	5.93952e-06	0.000194028	-0.968895	-0.969075	4.7654	2.85257e-06	8.84068e-05	0.0455273	0.0455384	4.7654	0.869654	1	0.325114	0.325188	4.7654	0.140611	0.601813	1.35702	1.35724	4.7654	5.87657e-09	3.55147e-06	0.274836	0.274876	4.7654	0.230096	0.961087	-0.643781	-0.643887	4.7654	0.000935558	0.0155838	0.43365	0.433699	4.7654	0.0327164	0.200354	-1.07743	-1.07759	4.7654	4.32894e-07	0.000232548	-0.368945	-0.369012
11480	Acvr2a	activin receptor IIA	0.0692482	0.0692562	5.32011	0.871154	1	-0.0114427	-0.0114441	5.32011	0.980576	1	0.080691	0.0807003	5.32011	0.84363	1	0.568681	0.568737	5.32011	0.000481994	0.0202637	-0.128685	-0.1287	5.32011	0.71288	1	0.164514	0.164534	5.32011	0.593274	1	0.557239	0.557293	5.32011	0.000624382	0.011351	-0.0594363	-0.0594433	5.32011	0.8923	1	0.616675	0.616736	5.32011	0.00013353	0.00969779	0.721752	0.721827
11481	Acvr2b	activin receptor IIB	-0.864804	-0.864919	4.99084	4.02637e-05	0.000934765	-0.620251	-0.620327	4.99084	0.00249843	0.0224941	-0.244553	-0.244593	4.99084	0.303287	1	-0.265948	-0.265991	4.99084	0.256002	0.774646	0.261455	0.261498	4.99084	0.265397	0.861501	0.284693	0.284724	4.99084	0.216213	0.947702	-0.886199	-0.886318	4.99084	2.76725e-05	0.000905513	-0.603349	-0.603422	4.99084	0.00322497	0.0395985	-0.28285	-0.282896	4.99084	0.221547	0.810133	-0.601506	-0.601594
11486	Ada	adenosine deaminase	1.18574	1.18726	2.01772	0.00274937	0.0273931	0.966334	0.967657	2.01772	0.0125723	0.0758352	0.219405	0.219601	2.01772	0.547553	1	0.115345	0.115452	2.01772	0.751518	1	-0.406236	-0.406623	2.01772	0.270384	0.868021	-0.266947	-0.267399	2.01772	0.476212	1	1.08168	1.08311	2.01772	0.0057297	0.060123	0.779503	0.780635	2.01772	0.0409848	0.231197	0.302176	0.302474	2.01772	0.410122	0.977876	0.814733	0.81571
114871	Psg28	pregnancy-specific glycoprotein 28	-0.551801	-0.554433	-0.0158581	0.489025	0.838879	0.314179	0.315288	-0.0158581	0.688215	0.943178	-0.86598	-0.869721	-0.0158581	0.282614	1	-0.0534761	-0.0536433	-0.0158581	0.945467	1	-2.25853	-2.29117	-0.0158581	0.0169864	0.22892	0.59528	0.598195	-0.0158581	0.455942	1	0.260703	0.261644	-0.0158581	0.738972	1	-2.81033	-2.8456	-0.0158581	0.00388864	0.0454649	3.07104	3.10724	-0.0158581	0.00199122	0.0643726	0.855984	0.85984
11488	Adam11	a disintegrin and metallopeptidase domain 11	0.392279	0.392425	3.63634	0.11394	0.379029	0.667262	0.667489	3.63634	0.00661395	0.0473555	-0.274983	-0.275064	3.63634	0.27447	1	-0.429093	-0.429226	3.63634	0.0819914	0.47239	-0.303476	-0.303585	3.63634	0.227421	0.814635	-0.0591523	-0.0591779	3.63634	0.819623	1	0.23817	0.238263	3.63634	0.347993	0.797163	0.0888037	0.0888402	3.63634	0.731524	1	0.149366	0.149423	3.63634	0.561516	1	0.179017	0.179085
114886	Cygb	cytoglobin	0.137776	0.137815	4.12751	0.617189	0.923896	0.895698	0.895895	4.12751	0.00164236	0.0164228	-0.757922	-0.758079	4.12751	0.00653859	0.303966	-0.850327	-0.85051	4.12751	0.00267367	0.0667177	0.0966722	0.0966958	4.12751	0.726239	1	0.285641	0.285734	4.12751	0.299907	1	0.0453716	0.0453846	4.12751	0.869592	1	0.234449	0.234511	4.12751	0.392718	0.799253	-0.189077	-0.189126	4.12751	0.492635	1	0.331012	0.331119
11489	Adam12	a disintegrin and metallopeptidase domain 12 (meltrin alpha)	1.02219	1.02284	2.94307	0.000113897	0.00215946	0.539595	0.539994	2.94307	0.0300121	0.141458	0.482596	0.482845	2.94307	0.0509619	0.768902	0.446371	0.446605	2.94307	0.0714792	0.442543	-0.189166	-0.189255	2.94307	0.45912	1	0.0702346	0.0702961	2.94307	0.787826	1	0.985967	0.986599	2.94307	0.000169182	0.00394669	0.833025	0.833584	2.94307	0.00103598	0.0168512	0.152942	0.153014	2.94307	0.551338	1	1.0562	1.05689
11490	Adam15	a disintegrin and metallopeptidase domain 15 (metargidin)	0.922917	0.923015	5.49812	1.17614e-08	1.01997e-06	1.07631	1.07642	5.49812	4.89677e-10	5.95589e-08	-0.153397	-0.153408	5.49812	0.675978	1	-0.780019	-0.780089	5.49812	4.24522e-07	0.000146604	-0.37058	-0.370612	5.49812	0.0373169	0.356328	-0.210152	-0.21018	5.49812	0.447844	1	0.296296	0.296334	5.49812	0.154553	0.534669	0.552338	0.552404	5.49812	0.000316637	0.00664869	-0.256042	-0.256069	5.49812	0.273644	0.869995	0.0861442	0.0861546
11492	Adam19	a disintegrin and metallopeptidase domain 19 (meltrin beta)	0.73793	0.738287	3.26491	0.00153432	0.0174851	0.614274	0.614584	3.26491	0.00796168	0.0543127	0.123656	0.123704	3.26491	0.625292	1	-0.00886766	-0.00887125	3.26491	0.972468	1	-0.264238	-0.264345	3.26491	0.278507	0.875434	0.0440833	0.0441118	3.26491	0.863473	1	0.605406	0.605712	3.26491	0.00886573	0.0837588	0.473692	0.473942	3.26491	0.042525	0.236964	0.131715	0.13177	3.26491	0.602302	1	0.64949	0.649824
11496	Adam22	a disintegrin and metallopeptidase domain 22	-0.399205	-0.399245	5.58714	0.0234216	0.134526	-0.199343	-0.199362	5.58714	0.480425	0.799014	-0.199862	-0.199883	5.58714	0.476185	1	0.658941	0.658994	5.58714	2.4132e-05	0.00248239	0.250741	0.250767	5.58714	0.28999	0.888625	0.322714	0.322746	5.58714	0.1038	0.754372	0.459598	0.459632	5.58714	0.00535637	0.0573335	-0.148464	-0.148478	5.58714	0.671161	0.980076	0.608062	0.60811	5.58714	9.80542e-05	0.00773988	0.782312	0.782378
11501	Adam8	a disintegrin and metallopeptidase domain 8	0.934869	0.938176	0.392507	0.149986	0.449403	0.233943	0.234987	0.392507	0.715035	0.958505	0.700925	0.703189	0.392507	0.276733	1	0.0914585	0.0918186	0.392507	0.88656	1	0.291643	0.292313	0.392507	0.642075	1	0.92778	0.9342	0.392507	0.168838	0.878896	0.325402	0.326805	0.392507	0.611566	0.976476	1.22651	1.23049	0.392507	0.0623904	0.302096	-0.90111	-0.903684	0.392507	0.163398	0.721124	1.25318	1.26101
11502	Adam9	a disintegrin and metallopeptidase domain 9 (meltrin gamma)	0.484673	0.484706	6.00905	0.00238147	0.0244195	0.265769	0.265789	6.00905	0.241372	0.554381	0.218904	0.218917	6.00905	0.411016	1	-0.0385156	-0.0385182	6.00905	0.947615	1	-0.2708	-0.270817	6.00905	0.225619	0.812037	-0.0939883	-0.0939956	6.00905	0.843124	1	0.227254	0.22727	6.00905	0.378446	0.824279	0.213874	0.213889	6.00905	0.430853	0.832355	0.0133801	0.0133811	6.00905	0.982626	1	0.133265	0.133275
11504	Adamts1	a disintegrin-like and metallopeptidase (reprolysin type) with thrombospondin type 1 motif, 1	0.861005	0.861177	4.48705	5.82074e-06	0.000191918	0.527078	0.527195	4.48705	0.0052832	0.0400013	0.333927	0.333982	4.48705	0.115366	0.975538	-0.343044	-0.343116	4.48705	0.103689	0.525393	-0.119057	-0.119075	4.48705	0.678166	1	-0.0313081	-0.0313165	4.48705	0.918996	1	0.184034	0.18408	4.48705	0.474569	0.899473	0.741949	0.742102	4.48705	6.47527e-05	0.0018949	-0.557915	-0.558022	4.48705	0.00285792	0.0811335	0.152726	0.152763
11513	Adcy7	adenylate cyclase 7	1.00131	1.00212	2.36098	0.00187047	0.0203013	0.632825	0.633405	2.36098	0.0396019	0.170647	0.368481	0.368719	2.36098	0.218995	1	-0.375562	-0.375876	2.36098	0.214157	0.721612	-0.650959	-0.651426	2.36098	0.0338419	0.336858	0.263083	0.263406	2.36098	0.387934	1	0.257262	0.257529	2.36098	0.395113	0.836809	0.350347	0.350699	2.36098	0.247482	0.650705	-0.0930842	-0.0931692	2.36098	0.757941	1	0.520345	0.520936
11514	Adcy8	adenylate cyclase 8	0.897415	0.898337	1.98707	0.0188322	0.115875	1.442	1.44326	1.98707	0.000392746	0.00537532	-0.544584	-0.544919	1.98707	0.140459	1	-1.39971	-1.40091	1.98707	0.000559318	0.0229439	-2.3543	-2.35869	1.98707	1.39746e-06	0.000272985	1.22891	1.23161	1.98707	0.00279722	0.139063	0.0422907	0.0423504	1.98707	0.908868	1	-1.45688	-1.46036	1.98707	0.000628466	0.0114876	1.49917	1.50271	1.98707	0.000489574	0.0237886	1.2712	1.27396
11518	Add1	adducin 1 (alpha)	-0.135319	-0.13532	8.86572	0.938858	1	-0.143818	-0.143819	8.86572	0.921211	1	0.0084991	0.00849918	8.86572	0.99966	1	-0.122784	-0.122785	8.86572	0.958442	1	-0.0250168	-0.025017	8.86572	0.998873	1	-0.146051	-0.146052	8.86572	0.916097	1	-0.266602	-0.266604	8.86572	0.22938	0.656404	-0.160336	-0.160337	8.86572	0.874774	1	-0.106266	-0.106267	8.86572	0.975781	1	-0.412653	-0.412656
11519	Add2	adducin 2 (beta)	0.347561	0.347575	6.88441	0.0434028	0.205274	0.569412	0.569433	6.88441	3.17071e-05	0.000679519	-0.221851	-0.221858	6.88441	0.434265	1	-0.204178	-0.204184	6.88441	0.52014	0.991787	-0.03791	-0.0379114	6.88441	0.97511	1	0.0559396	0.0559421	6.88441	0.958717	1	0.365234	0.365248	6.88441	0.0272136	0.183183	0.309651	0.309663	6.88441	0.105326	0.410252	0.0555829	0.0555849	6.88441	0.959486	1	0.421173	0.42119
11520	Plin2	perilipin 2	0.712372	0.712421	6.20245	1.1837e-06	5.08701e-05	0.609462	0.609506	6.20245	2.88979e-05	0.000627224	0.10291	0.102915	6.20245	0.85215	1	0.0815689	0.0815734	6.20245	0.897295	1	0.153412	0.15342	6.20245	0.70013	1	-0.194422	-0.194438	6.20245	0.530614	1	0.691031	0.691079	6.20245	2.25926e-06	0.000108416	0.865785	0.865841	6.20245	1.5241e-08	1.7338e-06	-0.174753	-0.174762	6.20245	0.616893	1	0.496609	0.496641
11538	Adnp	activity-dependent neuroprotective protein	-0.214522	-0.214589	3.82827	0.596013	0.911674	-1.32179	-1.32242	3.82827	0.00306616	0.0261103	1.10727	1.10783	3.82827	0.0116852	0.432913	1.63733	1.63804	3.82827	0.000422111	0.0186052	0.0875812	0.0876121	3.82827	0.82908	1	-0.186192	-0.186242	3.82827	0.643291	1	0.315541	0.315622	3.82827	0.432497	0.869344	-0.126941	-0.126977	3.82827	0.752657	1	0.442482	0.442599	3.82827	0.274577	0.870929	0.129349	0.129381
11539	Adora1	adenosine A1 receptor	0.929176	0.929389	4.35805	8.16969e-06	0.000253601	0.980382	0.980604	4.35805	3.51199e-06	0.000105053	-0.0512064	-0.0512146	4.35805	0.853465	1	-0.58146	-0.581573	4.35805	0.00366805	0.0831612	-0.51865	-0.518752	4.35805	0.0104657	0.171613	-0.181626	-0.181679	4.35805	0.466916	1	0.398922	0.39903	4.35805	0.0608699	0.312118	0.410526	0.410637	4.35805	0.0523862	0.270393	-0.0116042	-0.0116065	4.35805	0.966599	1	0.217296	0.217352
11540	Adora2a	adenosine A2a receptor	0.38262	0.3831	1.49699	0.370017	0.738164	-1.76753	-1.7725	1.49699	0.000454681	0.00604751	2.15015	2.1556	1.49699	5.15141e-05	0.0124529	1.35764	1.36193	1.49699	0.00511403	0.100305	-1.18336	-1.18534	1.49699	0.00962156	0.162144	-0.519251	-0.519874	1.49699	0.225154	0.955088	-0.409897	-0.410571	1.49699	0.342619	0.791162	-0.800736	-0.802242	1.49699	0.0700393	0.324196	0.390839	0.391671	1.49699	0.372657	0.952024	-0.929149	-0.930445
11541	Adora2b	adenosine A2b receptor	-0.383181	-0.383205	6.00067	0.0270495	0.148485	-0.54621	-0.546247	6.00067	0.000321736	0.00454165	0.16303	0.163042	6.00067	0.640889	1	-0.282793	-0.282818	6.00067	0.189243	0.686576	0.0101266	0.0101273	6.00067	0.98819	1	-0.0729389	-0.0729429	6.00067	0.900907	1	-0.829004	-0.829066	6.00067	9.34451e-08	7.14283e-06	-0.373054	-0.373078	6.00067	0.0339289	0.205176	-0.455949	-0.455988	6.00067	0.00448283	0.106242	-0.901942	-0.902008
11549	Adra1a	adrenergic receptor, alpha 1a	0.686671	0.687324	2.1083	0.107849	0.366425	0.438219	0.438664	2.1083	0.300841	0.623842	0.248452	0.24866	2.1083	0.554675	1	0.228523	0.228715	2.1083	0.585168	1	-0.381517	-0.381842	2.1083	0.362643	0.955011	1.11483	1.11679	2.1083	0.0133171	0.308801	0.666742	0.667379	2.1083	0.116511	0.459838	0.305154	0.305481	2.1083	0.46661	0.858998	0.361589	0.361898	2.1083	0.385974	0.961158	1.78157	1.78417
11551	Adra2a	adrenergic receptor, alpha 2a	0.832001	0.832813	2.62236	0.00917987	0.0684913	1.58567	1.5869	2.62236	8.87064e-06	0.000232767	-0.753669	-0.754092	2.62236	0.0151462	0.483247	-0.239762	-0.239873	2.62236	0.420406	0.926417	-0.519141	-0.51959	2.62236	0.0910774	0.561654	-0.245885	-0.246175	2.62236	0.422254	1	1.34591	1.34703	2.62236	8.22693e-05	0.00222207	0.31286	0.313222	2.62236	0.307158	0.71897	1.03305	1.03381	2.62236	0.00148373	0.0526492	1.10002	1.10086
11553	Adra2c	adrenergic receptor, alpha 2c	2.50714	2.50913	3.89764	2.12537e-12	8.56301e-10	3.18808	3.19023	3.89764	1.38623e-14	1.21856e-11	-0.68094	-0.6811	3.89764	0.00174361	0.135695	-0.0689106	-0.0689237	3.89764	0.789931	1	0.256617	0.256687	3.89764	0.282745	0.880037	-1.52251	-1.52408	3.89764	5.36914e-08	6.10787e-05	3.11917	3.12131	3.89764	2.20035e-14	1.85011e-11	2.76376	2.76582	3.89764	2.61364e-13	1.70345e-10	0.355412	0.355489	3.89764	0.119472	0.625806	1.59667	1.59723
11554	Adrb1	adrenergic receptor, beta 1	0.854374	0.854692	3.44139	0.00112271	0.013918	0.474399	0.474598	3.44139	0.063039	0.234489	0.379975	0.380093	3.44139	0.136952	1	-0.886241	-0.886674	3.44139	0.000949631	0.033759	-0.840739	-0.841049	3.44139	0.00135435	0.0438724	-0.386223	-0.38639	3.44139	0.132005	0.811937	-0.411841	-0.412076	3.44139	0.111648	0.449731	0.0136346	0.0136427	3.44139	0.958873	1	-0.425476	-0.425719	3.44139	0.100961	0.583266	-0.798064	-0.798466
11566	Adss	adenylosuccinate synthetase, non muscle	0.19829	0.198299	6.67631	0.444855	0.806133	0.191415	0.191424	6.67631	0.467086	0.788011	0.00687491	0.0068752	6.67631	0.984541	1	0.358479	0.358492	6.67631	0.0744611	0.453381	-0.436147	-0.436168	6.67631	0.0204747	0.254146	-0.0347164	-0.034718	6.67631	0.921085	1	0.549894	0.549916	6.67631	0.00199046	0.0272232	-0.237857	-0.237869	6.67631	0.321606	0.733437	0.787751	0.787785	6.67631	9.76058e-06	0.00161333	0.515178	0.515198
11600	Angpt1	angiopoietin 1	-0.371756	-0.371785	5.74083	0.0387252	0.190707	-0.347756	-0.347783	5.74083	0.0631904	0.234737	-0.0239999	-0.0240021	5.74083	0.967176	1	-0.0491195	-0.0491241	5.74083	0.929462	1	-0.0914262	-0.0914348	5.74083	0.84595	1	-0.142849	-0.142858	5.74083	0.70377	1	-0.396875	-0.396907	5.74083	0.0220872	0.158143	-0.463182	-0.46322	5.74083	0.004335	0.049043	0.0663066	0.0663129	5.74083	0.899664	1	-0.539724	-0.539766
11601	Angpt2	angiopoietin 2	0.888268	0.889723	1.35023	0.0255085	0.142533	0.997976	0.999557	1.35023	0.0129086	0.0773837	-0.109708	-0.109834	1.35023	0.773021	1	-1.07768	-1.07944	1.35023	0.00806696	0.132998	-1.3862	-1.38897	1.35023	0.00113587	0.039017	0.0231038	0.0231531	1.35023	0.9525	1	-0.0797015	-0.079881	1.35023	0.837477	1	-0.497935	-0.499252	1.35023	0.208736	0.599101	0.418233	0.419371	1.35023	0.292312	0.884112	-0.0565977	-0.0567279
11605	Gla	galactosidase, alpha	0.514548	0.514732	3.55285	0.027909	0.151501	-0.363108	-0.363284	3.55285	0.132679	0.38177	0.877656	0.878016	3.55285	0.000303354	0.0413138	0.69591	0.696213	3.55285	0.00330339	0.0780027	-0.0133816	-0.0133864	3.55285	0.958466	1	0.169681	0.169758	3.55285	0.500102	1	0.332803	0.332929	3.55285	0.167661	0.557304	0.501167	0.501346	3.55285	0.0323854	0.199015	-0.168364	-0.168417	3.55285	0.50264	1	0.502484	0.502687
11622	Ahr	aryl-hydrocarbon receptor	0.38044	0.380923	2.26659	0.281479	0.638535	0.793718	0.7946	2.26659	0.0283204	0.135835	-0.413278	-0.413677	2.26659	0.238824	1	0.377963	0.378237	2.26659	0.273229	0.798033	-0.020306	-0.0203357	2.26659	0.953506	1	-0.74954	-0.750383	2.26659	0.0376772	0.491991	1.17168	1.17284	2.26659	0.00175878	0.0250279	0.360134	0.360587	2.26659	0.305999	0.718415	0.811547	0.81225	2.26659	0.0238656	0.284023	0.422141	0.422454
11629	Aif1	allograft inflammatory factor 1	0.963731	0.964497	2.47275	0.0029127	0.0286515	0.956877	0.95764	2.47275	0.003079	0.0261966	0.00685409	0.00685779	2.47275	0.981824	1	-1.33627	-1.33751	2.47275	0.000115583	0.00757718	-0.481202	-0.481523	2.47275	0.114412	0.619953	-0.189472	-0.189663	2.47275	0.535239	1	-0.379394	-0.379872	2.47275	0.222484	0.645902	0.482529	0.482974	2.47275	0.115842	0.432508	-0.861923	-0.862847	2.47275	0.0081619	0.150477	-0.568866	-0.569535
11630	Crybg1	crystallin beta-gamma domain containing 1	-1.30724	-1.31038	1.52728	0.00797378	0.0619545	-1.18641	-1.18911	1.52728	0.0142275	0.0830067	-0.120827	-0.121274	1.52728	0.799199	1	1.75481	1.7582	1.52728	0.00064683	0.0254249	1.98143	1.98536	1.52728	0.000195903	0.0108555	0.544117	0.545077	1.52728	0.231522	0.962706	0.568403	0.569091	1.52728	0.205221	0.62025	0.674188	0.674977	1.52728	0.13453	0.470381	-0.105785	-0.105886	1.52728	0.810577	1	1.11252	1.11417
11647	Alpl	alkaline phosphatase, liver/bone/kidney	-0.0331669	-0.0331808	3.17346	0.898084	1	-0.0790528	-0.0790862	3.17346	0.759555	0.977005	0.0458859	0.0459055	3.17346	0.859495	1	-0.715185	-0.715586	3.17346	0.00416894	0.0894819	-0.677171	-0.677534	3.17346	0.0063232	0.125161	0.161789	0.161859	3.17346	0.527102	1	-0.794238	-0.794672	3.17346	0.00156119	0.0229074	-0.710338	-0.710715	3.17346	0.00413722	0.0474835	-0.0839	-0.0839576	3.17346	0.747072	1	-0.632449	-0.632814
11656	Alas2	aminolevulinic acid synthase 2, erythroid	0.519449	0.519627	3.91787	0.0144787	0.0954342	0.617248	0.617454	3.91787	0.00327237	0.0274672	-0.0977994	-0.0978266	3.91787	0.706306	1	-0.103494	-0.103522	3.91787	0.689299	1	0.177465	0.177514	3.91787	0.474942	1	-0.50443	-0.504604	3.91787	0.0178199	0.352257	0.513754	0.513932	3.91787	0.0157004	0.124331	0.696914	0.697141	3.91787	0.000883455	0.0149476	-0.183159	-0.183209	3.91787	0.459267	1	0.00932491	0.00932804
11658	Alcam	activated leukocyte cell adhesion molecule	-0.338945	-0.338971	5.79073	0.0736319	0.28634	-0.496583	-0.496622	5.79073	0.00170262	0.0168915	0.157638	0.157652	5.79073	0.64908	1	0.168241	0.168256	5.79073	0.610469	1	-0.167489	-0.167504	5.79073	0.613597	1	-0.0716171	-0.0716218	5.79073	0.894934	1	-0.328341	-0.328366	5.79073	0.0895437	0.398202	-0.506434	-0.506475	5.79073	0.00126961	0.0196739	0.178093	0.178109	5.79073	0.573567	1	-0.399958	-0.399988
11669	Aldh2	aldehyde dehydrogenase 2, mitochondrial	-0.317894	-0.31791	6.47541	0.102586	0.354461	-0.503822	-0.503848	6.47541	0.000945741	0.010702	0.185927	0.185938	6.47541	0.558658	1	-0.0354651	-0.0354673	6.47541	0.959507	1	0.181221	0.18123	6.47541	0.579197	1	-0.206942	-0.20695	6.47541	0.473172	1	-0.539287	-0.539315	6.47541	0.000327911	0.00682612	-0.136673	-0.13668	6.47541	0.747624	1	-0.402613	-0.402636	6.47541	0.0159844	0.223468	-0.746229	-0.746265
11670	Aldh3a1	aldehyde dehydrogenase family 3, subfamily A1	0.723554	0.727235	0.297816	0.294871	0.655014	1.77512	1.78176	0.297816	0.0148051	0.0853144	-1.05157	-1.05452	0.297816	0.127178	0.989373	-0.696081	-0.697783	0.297816	0.301501	0.827845	0.141449	0.141981	0.297816	0.834145	1	1.17599	1.18768	0.297816	0.112107	0.77043	1.07904	1.08397	0.297816	0.122083	0.471815	0.865003	0.869216	0.297816	0.211137	0.602594	0.21404	0.214758	0.297816	0.749957	1	2.25503	2.27165
116701	Fgfrl1	fibroblast growth factor receptor-like 1	0.143119	0.143123	7.22849	0.817035	1	-0.195852	-0.195858	7.22849	0.59036	0.883018	0.338971	0.338981	7.22849	0.0448374	0.739945	-0.330422	-0.330434	7.22849	0.0569438	0.39416	-0.307917	-0.307926	7.22849	0.0996212	0.581344	-0.215201	-0.215207	7.22849	0.489408	1	-0.526274	-0.526292	7.22849	6.09378e-05	0.00174017	-0.164798	-0.164803	7.22849	0.735975	1	-0.361476	-0.361489	7.22849	0.0235012	0.281483	-0.741475	-0.741498
11676	Aldoc	aldolase C, fructose-bisphosphate	-0.0798653	-0.0798654	11.58	0.999	1	-0.152504	-0.152504	11.58	0.96808	1	0.0726386	0.0726387	11.58	0.9993	1	-0.280986	-0.280987	11.58	0.130944	0.584832	-0.155877	-0.155877	11.58	0.963016	1	-0.410854	-0.410854	11.58	4.38747e-05	0.00942769	-0.43349	-0.433491	11.58	8.78877e-06	0.000344061	-0.235742	-0.235743	11.58	0.500579	0.884377	-0.197748	-0.197748	11.58	0.815489	1	-0.844344	-0.844345
11677	Akr1b3	aldo-keto reductase family 1, member B3 (aldose reductase)	0.654483	0.654599	4.77643	3.40057e-05	0.000807908	0.654389	0.654505	4.77643	3.38677e-05	0.000718064	9.36775e-05	9.36709e-05	4.77643	0.999861	1	-0.214047	-0.214079	4.77643	0.420725	0.926629	0.106389	0.106403	4.77643	0.796003	1	-0.02309	-0.023095	4.77643	0.963743	1	0.440342	0.440426	4.77643	0.00978747	0.0898085	0.760872	0.761002	4.77643	1.8456e-06	0.000101977	-0.32053	-0.320576	4.77643	0.109074	0.601479	0.417252	0.417331
116810	Foxn4	forkhead box N4	-0.324998	-0.325169	3.25177	0.186488	0.508672	0.543983	0.544196	3.25177	0.0220869	0.11357	-0.868982	-0.869364	3.25177	0.000427097	0.051302	-0.176366	-0.176426	3.25177	0.484461	0.968349	0.110711	0.110772	3.25177	0.665752	1	0.611729	0.612083	3.25177	0.01097	0.285871	0.367617	0.36777	3.25177	0.129835	0.488686	-0.214288	-0.214397	3.25177	0.393277	0.799579	0.581905	0.582166	3.25177	0.0149528	0.214747	0.979347	0.979853
11682	Alk	anaplastic lymphoma kinase	-1.07749	-1.08238	-0.201109	0.14214	0.436427	-2.56274	-2.58452	-0.201109	0.00254943	0.0228574	1.48525	1.50214	-0.201109	0.061599	0.8046	1.66794	1.68594	-0.201109	0.0372187	0.318211	-0.499496	-0.503487	-0.201109	0.498783	1	0.369198	0.370476	-0.201109	0.601253	1	-0.894797	-0.898578	-0.201109	0.216741	0.638275	-1.57698	-1.58587	-0.201109	0.0391878	0.22412	0.682184	0.687289	-0.201109	0.355959	0.93975	-0.525599	-0.528102
116847	Prelp	proline arginine-rich end leucine-rich repeat	0.23594	0.235972	5.62477	0.345226	0.711573	0.990095	0.990198	5.62477	3.32288e-09	2.94227e-07	-0.754154	-0.754226	5.62477	1.01956e-06	0.000704186	0.215021	0.215035	5.62477	0.429996	0.935189	0.903616	0.903697	5.62477	2.12157e-08	8.72957e-06	-0.0397675	-0.0397733	5.62477	0.945542	1	1.20512	1.20523	5.62477	4.35287e-11	1.1224e-08	1.13956	1.13967	5.62477	1.5627e-10	3.59775e-08	0.0655593	0.0655635	5.62477	0.908754	1	1.16535	1.16546
116873	Stim2	stromal interaction molecule 2	0.660322	0.660384	5.71813	0.000233843	0.00394959	0.519776	0.519827	5.71813	0.00467445	0.0363633	0.140546	0.140557	5.71813	0.62333	1	0.0210086	0.0210103	5.71813	0.950175	1	-0.047738	-0.0477415	5.71813	0.885502	1	-0.472613	-0.47266	5.71813	0.0116284	0.291676	0.540785	0.540838	5.71813	0.00301632	0.0374889	0.612584	0.612643	5.71813	0.00065571	0.0118845	-0.0717995	-0.0718052	5.71813	0.823771	1	0.0681723	0.0681778
11689	Alox5	arachidonate 5-lipoxygenase	2.99045	3.01141	0.0653318	0.0012986	0.0154926	2.80278	2.82332	0.0653318	0.00219811	0.0205377	0.187671	0.188085	0.0653318	0.80332	1	-1.94347	-1.95319	0.0653318	0.0213507	0.238671	-1.19089	-1.19471	0.0653318	0.129989	0.655115	-0.150574	-0.152583	0.0653318	0.85889	1	0.859304	0.870128	0.0653318	0.302235	0.749926	1.79956	1.8167	0.0653318	0.0349806	0.209128	-0.940252	-0.946568	0.0653318	0.242337	0.836585	0.708729	0.717546
11690	Alox5ap	arachidonate 5-lipoxygenase activating protein	2.13806	2.14325	1.12848	0.000193328	0.00335919	1.91589	1.92082	1.12848	0.000600038	0.00750106	0.222176	0.222428	1.12848	0.641682	1	-1.57964	-1.58317	1.12848	0.00325127	0.0774338	-1.38328	-1.3857	1.12848	0.00775245	0.14184	-0.406892	-0.408555	1.12848	0.419354	1	0.336251	0.337654	1.12848	0.505072	0.921123	0.754783	0.757547	1.12848	0.136265	0.473813	-0.418532	-0.419894	1.12848	0.402016	0.973511	-0.0706412	-0.0709014
11702	Amd1	S-adenosylmethionine decarboxylase 1	0.0728939	0.0729002	5.72498	0.856221	1	-0.103791	-0.1038	5.72498	0.776853	0.982727	0.176685	0.176701	5.72498	0.541288	1	0.552422	0.552466	5.72498	0.000912906	0.0327115	-0.12504	-0.125051	5.72498	0.714679	1	0.00712394	0.00712462	5.72498	0.987215	1	0.448631	0.448665	5.72498	0.010269	0.0925974	-0.0521457	-0.0521504	5.72498	0.901388	1	0.500777	0.500816	5.72498	0.00316588	0.087215	0.455755	0.45579
117160	Ttyh2	tweety family member 2	0.0389627	0.0389679	5.28721	0.930631	1	0.411368	0.411416	5.28721	0.0216352	0.112072	-0.372405	-0.372448	5.28721	0.0473383	0.752858	0.120215	0.120226	5.28721	0.738923	1	0.275745	0.275778	5.28721	0.214707	0.796559	-0.166078	-0.166099	5.28721	0.586439	1	0.531583	0.531642	5.28721	0.00130166	0.0200262	0.314708	0.314746	5.28721	0.124818	0.451105	0.216875	0.216896	5.28721	0.403275	0.973511	0.365504	0.365543
11737	Anp32a	acidic (leucine-rich) nuclear phosphoprotein 32 family, member A	-0.318993	-0.319089	4.01216	0.178188	0.495609	0.605795	0.605929	4.01216	0.00665653	0.0475914	-0.924788	-0.925018	4.01216	7.81718e-05	0.0154262	-0.672862	-0.673014	4.01216	0.00269308	0.0671152	0.132525	0.132568	4.01216	0.599243	1	0.388857	0.388978	4.01216	0.0939175	0.723902	-0.0670668	-0.0670851	4.01216	0.793421	1	-0.186468	-0.186522	4.01216	0.451659	0.845004	0.119401	0.119437	4.01216	0.637067	1	0.321791	0.321893
11740	Slc25a5	solute carrier family 25 (mitochondrial carrier, adenine nucleotide translocator), member 5	0.511521	0.511525	9.45361	3.60255e-07	1.86283e-05	0.316432	0.316434	9.45361	0.0342527	0.155204	0.195089	0.19509	9.45361	0.776687	1	-0.11265	-0.112651	9.45361	0.987451	1	-0.160101	-0.160102	9.45361	0.924033	1	-0.259484	-0.259485	9.45361	0.27516	1	0.203783	0.203784	9.45361	0.72076	1	0.35142	0.351423	9.45361	0.00574873	0.060127	-0.147638	-0.147639	9.45361	0.951162	1	-0.0557011	-0.0557014
11745	Anxa3	annexin A3	1.0425	1.04274	4.214	4.76358e-06	0.000163629	0.770892	0.771084	4.214	0.00030983	0.00442526	0.271609	0.271655	4.214	0.246789	1	-0.639163	-0.639315	4.214	0.00260686	0.0659008	-0.462137	-0.462222	4.214	0.0323905	0.327444	0.365933	0.366067	4.214	0.105715	0.756847	0.131729	0.131769	4.214	0.603674	0.972817	0.580364	0.580518	4.214	0.00636687	0.064533	-0.448635	-0.448748	4.214	0.0398273	0.373571	0.497662	0.497836
11746	Anxa4	annexin A4	0.777696	0.777824	4.87636	2.50252e-05	0.000628924	0.860856	0.860993	4.87636	4.49445e-06	0.000128959	-0.0831593	-0.0831693	4.87636	0.786687	1	-0.218139	-0.218167	4.87636	0.37595	0.892715	-0.260445	-0.26048	4.87636	0.259356	0.854607	0.0101799	0.0101824	4.87636	0.974395	1	0.642716	0.642827	4.87636	0.000439042	0.00859377	0.517251	0.517344	4.87636	0.00569011	0.0596917	0.125465	0.125483	4.87636	0.662676	1	0.652896	0.653009
11747	Anxa5	annexin A5	-0.538896	-0.538916	6.9998	6.56781e-05	0.00138936	-0.458896	-0.458913	6.9998	0.00118368	0.0127437	-0.0799999	-0.0800032	6.9998	0.937101	1	0.256708	0.256717	6.9998	0.276476	0.800989	0.527962	0.527981	6.9998	9.92676e-05	0.00653547	0.0899839	0.0899867	6.9998	0.924329	1	-0.202189	-0.202195	6.9998	0.540998	0.944172	-0.0109341	-0.0109344	6.9998	0.994651	1	-0.191255	-0.191261	6.9998	0.594314	1	-0.112205	-0.112209
11749	Anxa6	annexin A6	-0.0361862	-0.0361869	7.75404	0.978958	1	-0.127645	-0.127648	7.75404	0.837081	1	0.0914593	0.0914612	7.75404	0.917265	1	-0.262453	-0.262459	7.75404	0.25234	0.770476	-0.0169684	-0.0169687	7.75404	0.990822	1	-0.145483	-0.145485	7.75404	0.781642	1	-0.390099	-0.390107	7.75404	0.012354	0.105667	-0.0531546	-0.0531556	7.75404	0.96563	1	-0.336944	-0.336952	7.75404	0.0543009	0.437188	-0.535581	-0.535593
11758	Prdx6	peroxiredoxin 6	-0.124458	-0.124459	9.82574	0.988325	1	-0.178172	-0.178172	9.82574	0.894486	1	0.0537132	0.0537135	9.82574	0.999574	1	-0.25751	-0.257511	9.82574	0.293666	0.819395	0.0474501	0.0474503	9.82574	0.999685	1	0.0257881	0.0257882	9.82574	0.999896	1	-0.435681	-0.435683	9.82574	1.27214e-05	0.000469504	-0.0770082	-0.0770086	9.82574	0.998714	1	-0.358673	-0.358675	9.82574	0.00225192	0.0693311	-0.409893	-0.409895
117599	Helb	helicase (DNA) B	0.275249	0.275701	1.80667	0.41332	0.777699	0.681704	0.68267	1.80667	0.0479547	0.193449	-0.406454	-0.406969	1.80667	0.228511	1	0.566184	0.566703	1.80667	0.0927695	0.498353	-0.0714194	-0.0715323	1.80667	0.831298	1	-0.00151274	-0.00151596	1.80667	0.996452	1	1.24789	1.24937	1.80667	0.000630228	0.0114031	0.20383	0.204168	1.80667	0.542453	0.911821	1.04406	1.0452	1.80667	0.00330842	0.090115	1.24638	1.24786
117600	Srgap1	SLIT-ROBO Rho GTPase activating protein 1	0.343812	0.343889	4.32644	0.132962	0.41866	0.434689	0.434784	4.32644	0.0497377	0.198612	-0.090877	-0.0908946	4.32644	0.723792	1	0.0541241	0.054134	4.32644	0.835114	1	-0.367714	-0.367798	4.32644	0.105417	0.597324	0.214995	0.215054	4.32644	0.377037	1	0.488813	0.488918	4.32644	0.0252235	0.174092	-0.0239019	-0.0239083	4.32644	0.926877	1	0.512715	0.512826	4.32644	0.0186877	0.245092	0.703809	0.703972
117606	Boc	biregional cell adhesion molecule-related/down-regulated by oncogenes (Cdon) binding protein	-0.639607	-0.639658	5.80239	9.14239e-05	0.00180782	-0.637109	-0.63716	5.80239	9.75259e-05	0.00174207	-0.00249806	-0.00249825	5.80239	0.995499	1	-0.315118	-0.315153	5.80239	0.126844	0.577729	0.367837	0.367869	5.80239	0.0527479	0.434661	-0.223552	-0.223566	5.80239	0.379085	1	-0.952228	-0.952313	5.80239	5.45695e-08	4.64899e-06	-0.27177	-0.271789	5.80239	0.225648	0.624205	-0.680458	-0.680524	5.80239	3.50164e-05	0.00358514	-1.17578	-1.17588
11764	Ap1b1	adaptor protein complex AP-1, beta 1 subunit	-0.112587	-0.11259	6.94596	0.865599	1	-0.170521	-0.170527	6.94596	0.67224	0.932933	0.0579343	0.0579364	6.94596	0.955543	1	-0.148951	-0.148957	6.94596	0.755266	1	-0.144351	-0.144356	6.94596	0.772042	1	-0.146789	-0.146794	6.94596	0.765624	1	-0.319472	-0.319483	6.94596	0.0857148	0.387155	-0.256937	-0.256947	6.94596	0.274485	0.683137	-0.0625342	-0.0625368	6.94596	0.950241	1	-0.46626	-0.466277
11765	Ap1g1	adaptor protein complex AP-1, gamma 1 subunit	0.082091	0.082096	6.39356	0.936103	1	0.241566	0.24158	6.39356	0.345513	0.673238	-0.159475	-0.159484	6.39356	0.735423	1	0.358634	0.35865	6.39356	0.0289111	0.280116	0.24598	0.245993	6.39356	0.324745	0.921085	-0.167876	-0.167886	6.39356	0.702235	1	0.6002	0.600231	6.39356	6.20014e-06	0.000255116	0.328071	0.328089	6.39356	0.0652582	0.309624	0.272129	0.272141	6.39356	0.213925	0.799933	0.432324	0.432345
11770	Fabp4	fatty acid binding protein 4, adipocyte	6.0993	6.62951	-0.635689	1.14116e-05	0.000334376	5.87786	6.40698	-0.635689	1.79757e-05	0.000413355	0.221437	0.222528	-0.635689	0.772879	1	0.0169598	0.0170495	-0.635689	0.982351	1	-0.0968271	-0.0972873	-0.635689	0.899111	1	1.6865	1.44269e+08	-0.635689	0.27435	1	5.89482	6.42403	-0.635689	1.71626e-05	0.000598241	6.00247	6.53222	-0.635689	1.37334e-05	0.000545361	-0.10765	-0.108191	-0.635689	0.887988	1	7.58132	1.44269e+08
11775	Ap3b2	adaptor-related protein complex 3, beta 2 subunit	0.386436	0.386464	5.98823	0.0289628	0.15563	0.47134	0.471373	5.98823	0.00370435	0.0302911	-0.0849039	-0.0849091	5.98823	0.860001	1	-0.191196	-0.191208	5.98823	0.517558	0.99034	-0.0811638	-0.081169	5.98823	0.868029	1	-0.0190294	-0.0190309	5.98823	0.973798	1	0.280144	0.280165	5.98823	0.1988	0.609286	0.305272	0.305295	5.98823	0.135992	0.473612	-0.0251281	-0.0251298	5.98823	0.965348	1	0.261115	0.261134
11777	Ap3s1	adaptor-related protein complex 3, sigma 1 subunit	0.192552	0.192556	7.99319	0.45681	0.815493	0.0206512	0.0206516	7.99319	0.950535	1	0.171901	0.171904	7.99319	0.522252	1	0.55115	0.551159	7.99319	0.00249877	0.0645501	-0.0805117	-0.0805131	7.99319	0.798141	1	-0.146118	-0.146121	7.99319	0.604373	1	0.571802	0.571811	7.99319	0.00161509	0.0235374	0.11204	0.112042	7.99319	0.708597	0.99553	0.459761	0.459769	7.99319	0.0148796	0.214265	0.425683	0.42569
11787	Apbb2	amyloid beta (A4) precursor protein-binding, family B, member 2	0.343212	0.343237	6.13841	0.0478357	0.218207	0.614412	0.614452	6.13841	5.90903e-06	0.000164661	-0.271199	-0.271215	6.13841	0.218631	1	-0.174746	-0.174756	6.13841	0.660613	1	0.146117	0.146126	6.13841	0.772657	1	-0.179545	-0.179559	6.13841	0.637079	1	0.439666	0.439696	6.13841	0.00273636	0.0348569	0.489329	0.489362	6.13841	0.000502132	0.00975952	-0.0496633	-0.0496662	6.13841	0.96679	1	0.260121	0.260137
11789	Apc	adenomatosis polyposis coli	0.350294	0.350304	7.35458	0.0327351	0.169631	0.25546	0.255468	7.35458	0.283673	0.604014	0.0948342	0.0948367	7.35458	0.929136	1	0.526684	0.526696	7.35458	6.00667e-05	0.00472207	0.00669567	0.00669584	7.35458	0.997496	1	0.204823	0.20483	7.35458	0.541968	1	0.782144	0.782164	7.35458	5.80365e-09	7.2881e-07	0.35699	0.357	7.35458	0.0268348	0.176097	0.425154	0.425163	7.35458	0.00277627	0.0795412	0.986967	0.986994
11796	Birc3	baculoviral IAP repeat-containing 3	1.13446	1.13755	0.963914	0.0151458	0.0989208	1.49371	1.49737	0.963914	0.00203636	0.0194063	-0.359249	-0.359817	0.963914	0.413109	1	-0.863871	-0.865524	0.963914	0.0565598	0.392533	-0.773378	-0.775222	0.963914	0.0879918	0.552059	-0.415304	-0.416738	0.963914	0.355716	1	0.629839	0.631845	0.963914	0.164331	0.552496	0.361083	0.362329	0.963914	0.422058	0.825291	0.268756	0.269516	0.963914	0.547513	1	0.214535	0.215107
11799	Birc5	baculoviral IAP repeat-containing 5	1.0479	1.0481	4.85483	1.38902e-07	8.63736e-06	0.925897	0.92608	4.85483	1.17407e-06	4.19693e-05	0.122002	0.122019	4.85483	0.676369	1	-0.0978689	-0.0978832	4.85483	0.746778	1	0.466679	0.466731	4.85483	0.0131789	0.196203	-0.116124	-0.116153	4.85483	0.687921	1	0.828028	0.828197	4.85483	8.21034e-06	0.000325369	1.51458	1.51483	4.85483	6.53147e-11	1.83061e-08	-0.68655	-0.686633	4.85483	0.000140764	0.0100824	0.711904	0.712044
11803	Aplp1	amyloid beta (A4) precursor-like protein 1	0.729423	0.729429	9.11161	6.88766e-09	6.43481e-07	0.699643	0.699649	9.11161	2.03493e-08	1.35235e-06	0.0297799	0.0297801	9.11161	0.993114	1	-0.149748	-0.149749	9.11161	0.830634	1	-0.217818	-0.21782	9.11161	0.498606	1	-0.265961	-0.265964	9.11161	0.236301	0.967459	0.549895	0.5499	9.11161	8.05374e-06	0.000320476	0.511605	0.51161	9.11161	4.09649e-05	0.00130514	0.0382904	0.0382907	9.11161	0.990488	1	0.283934	0.283936
11810	Apobec1	apolipoprotein B mRNA editing enzyme, catalytic polypeptide 1	0.472776	0.472842	4.93031	0.00894357	0.0671949	0.173336	0.173363	4.93031	0.531639	0.840823	0.29944	0.299479	4.93031	0.165065	1	-0.338015	-0.33807	4.93031	0.098901	0.511654	-0.664043	-0.664142	4.93031	0.000130284	0.00797333	-0.539185	-0.539258	4.93031	0.00213496	0.12176	-0.164679	-0.164708	4.93031	0.559228	0.954454	-0.191267	-0.1913	4.93031	0.471149	0.862176	0.0265877	0.0265923	4.93031	0.941067	1	-0.703865	-0.703966
11812	Apoc1	apolipoprotein C-I	1.34371	1.34635	1.1167	0.0027781	0.0276225	0.656634	0.658234	1.1167	0.122391	0.362136	0.687072	0.68812	1.1167	0.102812	0.947861	-0.282828	-0.28343	1.1167	0.499405	0.977459	-0.828991	-0.830324	1.1167	0.0510393	0.427562	0.109451	0.109787	1.1167	0.795835	1	0.373806	0.374804	1.1167	0.375136	0.821045	0.514715	0.51603	1.1167	0.222437	0.619574	-0.140909	-0.141226	1.1167	0.735757	1	0.483258	0.484591
11813	Apoc2	apolipoprotein C-II	4.63074	4.81497	-0.51044	0.00139557	0.0163272	5.03845	5.2244	-0.51044	0.000679508	0.00828563	-0.407708	-0.409436	-0.51044	0.683744	1	-1.55239	-1.56304	-0.51044	0.146392	0.612174	0.477309	0.479322	-0.51044	0.63376	1	-1.34148	-1.46118	-0.51044	0.339416	1	3.48606	3.66136	-0.51044	0.0120982	0.104217	5.10805	5.29429	-0.51044	0.000602619	0.0111415	-1.62199	-1.63293	-0.51044	0.130366	0.651376	2.14459	2.20018
11816	Apoe	apolipoprotein E	-0.0137524	-0.0137524	11.6893	0.999997	1	0.0541508	0.0541509	11.6893	0.999963	1	-0.0679032	-0.0679033	11.6893	0.999918	1	-0.456552	-0.456553	11.6893	1.29598e-07	5.96739e-05	-0.20097	-0.20097	11.6893	0.864906	1	0.0362447	0.0362447	11.6893	0.999987	1	-0.402402	-0.402402	11.6893	1.11027e-05	0.000416924	-0.214722	-0.214722	11.6893	0.767601	1	-0.187679	-0.18768	11.6893	0.925771	1	-0.366157	-0.366157
11819	Nr2f2	nuclear receptor subfamily 2, group F, member 2	0.248199	0.248227	5.28282	0.29131	0.650235	0.296307	0.296341	5.28282	0.17641	0.45867	-0.0481085	-0.0481134	5.28282	0.883089	1	-0.0711532	-0.0711606	5.28282	0.823942	1	-0.622233	-0.622315	5.28282	0.000587327	0.0248541	-0.362886	-0.362926	5.28282	0.0735248	0.664479	0.225154	0.22518	5.28282	0.356959	0.805198	-0.374034	-0.374088	5.28282	0.0633685	0.304351	0.599188	0.599268	5.28282	0.000943845	0.0384274	-0.137732	-0.137746
11838	Arc	activity regulated cytoskeletal-associated protein	-0.162346	-0.162388	4.16898	0.515329	0.856991	0.0927062	0.092728	4.16898	0.718242	0.960279	-0.255052	-0.255116	4.16898	0.285409	1	-0.494633	-0.494767	4.16898	0.0248109	0.258168	-0.302312	-0.302405	4.16898	0.196963	0.772159	-0.552601	-0.552712	4.16898	0.0104148	0.280182	-0.401927	-0.402039	4.16898	0.0740617	0.353346	-0.464659	-0.464793	4.16898	0.0356398	0.211228	0.0627314	0.0627536	4.16898	0.807655	1	-0.954528	-0.954751
11840	Arf1	ADP-ribosylation factor 1	0.340916	0.340919	8.88301	0.0135159	0.0910748	0.378658	0.378662	8.88301	0.00194331	0.0187627	-0.0377423	-0.0377427	8.88301	0.999021	1	-0.167495	-0.167497	8.88301	0.878624	1	0.0385647	0.038565	8.88301	0.998986	1	-0.210869	-0.210872	8.88301	0.641859	1	0.211163	0.211165	8.88301	0.639708	0.989588	0.379481	0.379484	8.88301	0.00185666	0.0265773	-0.168318	-0.168319	8.88301	0.875714	1	0.00029361	0.000293612
11844	Arf5	ADP-ribosylation factor 5	0.581098	0.581109	8.03692	6.20409e-07	2.92636e-05	0.621721	0.621732	8.03692	1.05128e-07	5.38741e-06	-0.0406226	-0.0406232	8.03692	0.994276	1	-0.115864	-0.115866	8.03692	0.942403	1	-0.0611203	-0.0611212	8.03692	0.98852	1	-0.346024	-0.346031	8.03692	0.0222794	0.38977	0.505856	0.505866	8.03692	1.94198e-05	0.000665885	0.519978	0.519988	8.03692	1.00071e-05	0.000431982	-0.0141215	-0.0141217	8.03692	0.99841	1	0.159833	0.159835
11845	Arf6	ADP-ribosylation factor 6	0.482674	0.482699	6.38538	0.00265535	0.0266347	0.462289	0.462314	6.38538	0.00456301	0.0356686	0.0203845	0.0203854	6.38538	0.972733	1	-0.172696	-0.172704	6.38538	0.591847	1	-0.233502	-0.233514	6.38538	0.353794	0.948519	-0.0320434	-0.0320454	6.38538	0.955816	1	0.289593	0.28961	6.38538	0.172858	0.567134	0.249171	0.249186	6.38538	0.296786	0.707064	0.040422	0.0404242	6.38538	0.9438	1	0.25755	0.257565
118452	Baalc	brain and acute leukemia, cytoplasmic	-1.43531	-1.43547	5.08659	2.35765e-08	1.85344e-06	-2.32821	-2.32858	5.08659	2.42589e-12	7.21759e-10	0.892899	0.893114	5.08659	8.86502e-05	0.0168257	0.0123519	0.0123561	5.08659	0.96173	1	-0.42667	-0.426758	5.08659	0.0573362	0.456478	0.124716	0.124725	5.08659	0.624986	1	-2.31586	-2.31623	5.08659	2.49851e-12	8.62835e-10	-1.86198	-1.86223	5.08659	1.65622e-10	3.7682e-08	-0.453876	-0.454	5.08659	0.0439589	0.391787	-2.19114	-2.1915
11847	Arg2	arginase type II	1.05086	1.05165	2.34357	0.000479726	0.00705109	0.189363	0.189551	2.34357	0.501871	0.816911	0.861496	0.862097	2.34357	0.00318229	0.197885	0.205239	0.205416	2.34357	0.465969	0.956032	-1.11204	-1.11289	2.34357	0.000266518	0.0138132	0.428492	0.429018	2.34357	0.131529	0.811627	0.394601	0.394967	2.34357	0.159443	0.544012	-0.0611818	-0.0612434	2.34357	0.828706	1	0.455783	0.45621	2.34357	0.105894	0.593882	0.823093	0.823985
11855	Arhgap5	Rho GTPase activating protein 5	-0.461268	-0.461278	7.54645	0.00917548	0.068485	-0.749821	-0.74984	7.54645	9.20226e-06	0.000238838	0.288554	0.288562	7.54645	0.185409	1	0.514581	0.514595	7.54645	0.00282666	0.0696795	-0.180326	-0.180331	7.54645	0.52099	1	-0.0290174	-0.029018	7.54645	0.943546	1	-0.23524	-0.235245	7.54645	0.334866	0.78392	-0.641593	-0.641609	7.54645	0.000129166	0.00327526	0.406353	0.406364	7.54645	0.0280324	0.309254	-0.264257	-0.264263
11856	Arhgap6	Rho GTPase activating protein 6	0.390136	0.391212	0.678931	0.439979	0.802469	1.06627	1.06865	0.678931	0.0404626	0.17293	-0.676135	-0.677436	0.678931	0.182531	1	-1.79111	-1.79647	0.678931	0.00163076	0.0487437	0.0461212	0.0462152	0.678931	0.926784	1	1.92327	1.93605	0.678931	0.00135304	0.0905415	-0.724837	-0.727824	0.678931	0.164973	0.553072	0.436257	0.437427	0.678931	0.387907	0.796023	-1.16109	-1.16525	0.678931	0.0305418	0.32361	1.19844	1.20823
11857	Arhgdib	Rho, GDP dissociation inhibitor (GDI) beta	1.60841	1.60881	4.31912	6.39021e-11	1.34326e-08	1.2294	1.22975	4.31912	1.75264e-08	1.19346e-06	0.379009	0.379069	4.31912	0.0647868	0.814221	-0.458308	-0.458403	4.31912	0.0197551	0.227543	-0.666497	-0.666612	4.31912	0.000369585	0.0178239	-0.302358	-0.302472	4.31912	0.173254	0.885922	0.771094	0.771343	4.31912	5.76552e-05	0.00166169	0.941915	0.942203	4.31912	2.17915e-06	0.000117389	-0.170821	-0.17086	4.31912	0.511291	1	0.468736	0.468871
11858	Rnd2	Rho family GTPase 2	0.692329	0.692351	7.18958	1.21145e-07	7.75772e-06	0.721514	0.721537	7.18958	4.37143e-08	2.56179e-06	-0.0291854	-0.0291861	7.18958	0.988343	1	-0.247421	-0.247428	7.18958	0.32183	0.850656	-0.0146864	-0.0146868	7.18958	0.994492	1	0.00331484	0.00331496	7.18958	0.998744	1	0.474093	0.47411	7.18958	0.000459726	0.00889954	0.677642	0.677664	7.18958	2.02178e-07	1.55155e-05	-0.203549	-0.203555	7.18958	0.550161	1	0.477408	0.477425
11865	Arntl	aryl hydrocarbon receptor nuclear translocator-like	-0.439093	-0.439131	5.76626	0.00466563	0.0414082	-0.455469	-0.455509	5.76626	0.00287799	0.0249809	0.0163762	0.0163778	5.76626	0.985069	1	0.147703	0.147718	5.76626	0.726463	1	0.230538	0.230559	5.76626	0.379406	0.966746	-0.455822	-0.455851	5.76626	0.00266491	0.133862	-0.307765	-0.307791	5.76626	0.118016	0.462942	-0.208555	-0.208571	5.76626	0.478153	0.867612	-0.0992107	-0.0992195	5.76626	0.868294	1	-0.763588	-0.763642
11867	Arpc1b	actin related protein 2/3 complex, subunit 1B	1.11156	1.11161	6.59693	2.42375e-12	9.37458e-10	0.978412	0.978459	6.59693	4.99882e-11	9.20687e-09	0.133146	0.13315	6.59693	0.838194	1	-0.756773	-0.756807	6.59693	2.11321e-08	1.70281e-05	-0.530151	-0.530171	6.59693	6.68502e-05	0.00491565	-0.0729754	-0.0729802	6.59693	0.951296	1	0.221639	0.221653	6.59693	0.446992	0.881524	0.581406	0.581438	6.59693	1.0242e-05	0.000439178	-0.359767	-0.359786	6.59693	0.0268366	0.302088	0.148663	0.148672
11877	Arvcf	armadillo repeat gene deleted in velocardiofacial syndrome	-0.557034	-0.557048	7.57334	0.00084301	0.0111359	-0.450519	-0.45053	7.57334	0.010294	0.0656363	-0.106515	-0.106518	7.57334	0.767587	1	0.0752926	0.0752947	7.57334	0.848536	1	0.547273	0.547287	7.57334	0.00107806	0.037701	-0.131588	-0.13159	7.57334	0.695176	1	-0.375226	-0.375235	7.57334	0.0468793	0.264541	-0.00976087	-0.00976107	7.57334	0.98239	1	-0.365465	-0.365474	7.57334	0.055953	0.44437	-0.506814	-0.506825
11878	Arx	aristaless related homeobox	0.128183	0.128188	6.86069	0.752731	0.991693	0.0391357	0.0391371	6.86069	0.947841	1	0.0890476	0.0890506	6.86069	0.856514	1	-0.424079	-0.424096	6.86069	0.0114633	0.16385	-0.430227	-0.430244	6.86069	0.00978241	0.163487	-0.162375	-0.162381	6.86069	0.635824	1	-0.384943	-0.384959	6.86069	0.0285128	0.189735	-0.302044	-0.302056	6.86069	0.141509	0.485069	-0.0828989	-0.0829027	6.86069	0.868604	1	-0.547318	-0.54734
11881	Arsb	arylsulfatase B	0.155077	0.155085	6.23187	0.740417	0.986327	0.041626	0.0416284	6.23187	0.973146	1	0.113451	0.113457	6.23187	0.8676	1	-0.430068	-0.430097	6.23187	0.00389594	0.086107	-0.327595	-0.327614	6.23187	0.0700011	0.499539	-0.248702	-0.248716	6.23187	0.310329	1	-0.388442	-0.388468	6.23187	0.0139106	0.11429	-0.172518	-0.172529	6.23187	0.668759	0.979337	-0.215924	-0.21594	6.23187	0.462915	1	-0.637145	-0.637184
11886	Asah1	N-acylsphingosine amidohydrolase 1	0.127998	0.128002	7.18361	0.775365	1	-0.199854	-0.199861	7.18361	0.502496	0.817375	0.327852	0.327862	7.18361	0.0847703	0.897525	-0.0285321	-0.0285331	7.18361	0.968862	1	-0.210481	-0.210488	7.18361	0.457452	1	-0.215419	-0.215425	7.18361	0.437022	1	-0.228386	-0.228394	7.18361	0.382488	0.82726	-0.0824833	-0.0824859	7.18361	0.888559	1	-0.145903	-0.145908	7.18361	0.715756	1	-0.443806	-0.443819
11898	Ass1	argininosuccinate synthetase 1	-0.288001	-0.288336	2.10508	0.389263	0.757439	-0.234257	-0.234524	2.10508	0.482295	0.80006	-0.0537441	-0.0538118	2.10508	0.872855	1	-0.337884	-0.338355	2.10508	0.320579	0.849154	0.349107	0.349504	2.10508	0.299338	0.897086	-0.753547	-0.754164	2.10508	0.0280099	0.432309	-0.57214	-0.572879	2.10508	0.0950681	0.411118	0.0611065	0.0611686	2.10508	0.853241	1	-0.633247	-0.634048	2.10508	0.0671523	0.48	-1.32569	-1.32704
11910	Atf3	activating transcription factor 3	1.75191	1.75375	2.16014	1.71819e-05	0.000464078	0.757544	0.758612	2.16014	0.0352773	0.158363	0.994366	0.995136	2.16014	0.00595648	0.287263	-0.185677	-0.18589	2.16014	0.590487	1	-0.383833	-0.384069	2.16014	0.257796	0.853537	0.348339	0.349064	2.16014	0.329948	1	0.571867	0.572723	2.16014	0.107814	0.441802	1.36808	1.36968	2.16014	0.00035545	0.0073206	-0.79621	-0.796956	2.16014	0.0255815	0.293771	0.920206	0.921787
11920	Atm	ataxia telangiectasia mutated	-0.136494	-0.13653	4.18278	0.599949	0.913668	-0.165935	-0.16598	4.18278	0.512896	0.825418	0.0294413	0.0294496	4.18278	0.914767	1	0.665778	0.665931	4.18278	0.000835463	0.0307753	0.444799	0.444907	4.18278	0.0321957	0.325974	0.294035	0.294119	4.18278	0.195407	0.918572	0.499843	0.499951	4.18278	0.013512	0.112149	0.308305	0.308376	4.18278	0.168842	0.535331	0.191537	0.191574	4.18278	0.440914	0.996413	0.793878	0.794069
11922	Neurod6	neurogenic differentiation 6	0.725121	0.725137	7.91698	7.81589e-07	3.58179e-05	0.711903	0.71192	7.91698	1.1641e-06	4.16898e-05	0.0132175	0.0132178	7.91698	0.987368	1	0.130537	0.130539	7.91698	0.777303	1	0.246503	0.246507	7.91698	0.312012	0.909247	-0.564035	-0.564049	7.91698	0.000118081	0.0187178	0.84244	0.842459	7.91698	2.7827e-08	2.65096e-06	0.971624	0.971644	7.91698	1.28125e-09	2.09984e-07	-0.129184	-0.129186	7.91698	0.781959	1	0.278405	0.27841
11923	Neurod4	neurogenic differentiation 4	0.639796	0.640033	4.43099	0.00559907	0.0474516	1.22842	1.2288	4.43099	1.80121e-06	6.01617e-05	-0.588628	-0.58877	4.43099	0.0098816	0.391997	0.874329	0.874457	4.43099	0.000152044	0.0091114	0.728975	0.729144	4.43099	0.00140681	0.044895	-0.554326	-0.554536	4.43099	0.0164793	0.338675	2.10275	2.10326	4.43099	6.63136e-11	1.58326e-08	1.36877	1.36918	4.43099	2.54936e-07	1.90169e-05	0.733981	0.734083	4.43099	0.00108491	0.0419621	1.54843	1.54872
11924	Neurog2	neurogenin 2	-0.108645	-0.108657	5.91044	0.799976	1	0.0847241	0.0847328	5.91044	0.859905	1	-0.193369	-0.19339	5.91044	0.506822	1	0.796433	0.796493	5.91044	4.1036e-07	0.000145325	1.32066	1.32076	5.91044	8.01357e-12	1.29145e-08	-0.575957	-0.576007	5.91044	0.000196401	0.026768	0.881157	0.881226	5.91044	4.543e-08	3.9935e-06	1.21201	1.2121	5.91044	4.97682e-11	1.48072e-08	-0.330856	-0.330873	5.91044	0.085929	0.545562	0.3052	0.305219
11946	Atp5a1	ATP synthase, H+ transporting, mitochondrial F1 complex, alpha subunit 1	0.325505	0.325507	9.44007	0.0265273	0.146575	0.357186	0.357188	9.44007	0.00566416	0.0421304	-0.0316805	-0.0316807	9.44007	0.999341	1	-0.155867	-0.155868	9.44007	0.918509	1	-0.0465615	-0.0465618	9.44007	0.998722	1	-0.131535	-0.131536	9.44007	0.964298	1	0.201319	0.20132	9.44007	0.712942	1	0.278944	0.278945	9.44007	0.158542	0.516833	-0.0776247	-0.0776252	9.44007	0.99543	1	0.0697838	0.0697843
11947	Atp5b	ATP synthase, H+ transporting mitochondrial F1 complex, beta subunit	0.389639	0.389641	10.4178	4.18169e-05	0.000960447	0.344283	0.344284	10.4178	0.00174644	0.0172049	0.0453569	0.0453571	10.4178	0.99997	1	-0.160953	-0.160954	10.4178	0.978815	1	-0.0520638	-0.0520639	10.4178	0.999957	1	-0.202203	-0.202204	10.4178	0.849547	1	0.18333	0.18333	10.4178	0.934496	1	0.337576	0.337577	10.4178	0.00294608	0.0371895	-0.154246	-0.154247	10.4178	0.985232	1	-0.0188737	-0.0188738
11951	Atp5g1	ATP synthase, H+ transporting, mitochondrial F0 complex, subunit C1 (subunit 9)	0.380053	0.380062	7.62241	0.0214486	0.126423	0.50407	0.504082	7.62241	0.00049927	0.00651582	-0.124017	-0.12402	7.62241	0.817927	1	-0.283738	-0.283744	7.62241	0.179357	0.669142	-0.0637677	-0.063769	7.62241	0.93971	1	-0.0693814	-0.0693832	7.62241	0.931677	1	0.220332	0.220338	7.62241	0.430605	0.868971	0.316285	0.316293	7.62241	0.0970026	0.39139	-0.0959529	-0.095955	7.62241	0.886016	1	0.150951	0.150955
11975	Atp6v0a1	ATPase, H+ transporting, lysosomal V0 subunit A1	0.549488	0.549512	6.62048	0.000216675	0.00372139	0.400707	0.400726	6.62048	0.0160007	0.0903204	0.148781	0.148787	6.62048	0.709151	1	-0.196257	-0.196266	6.62048	0.519456	0.991351	-0.207656	-0.207664	6.62048	0.471424	1	-0.0686777	-0.0686814	6.62048	0.914728	1	0.20445	0.20446	6.62048	0.484446	0.907717	0.341832	0.341848	6.62048	0.0630186	0.303787	-0.137382	-0.137389	6.62048	0.747429	1	0.135772	0.135779
11977	Atp7a	ATPase, Cu++ transporting, alpha polypeptide	0.178279	0.178315	4.5951	0.472106	0.826794	0.0779351	0.0779514	4.5951	0.761088	0.977791	0.100344	0.100364	4.5951	0.693659	1	0.781272	0.781394	4.5951	0.000432453	0.018836	-0.0258558	-0.0258604	4.5951	0.920345	1	0.268425	0.268488	4.5951	0.261694	0.991183	0.859208	0.859345	4.5951	0.000128161	0.0031735	0.152423	0.152454	4.5951	0.542807	0.91202	0.706784	0.706891	4.5951	0.00128539	0.0472691	1.12763	1.12783
11981	Atp9a	ATPase, class II, type 9A	0.452628	0.452634	8.36541	0.000384162	0.00591976	0.668673	0.668682	8.36541	3.87868e-08	2.30091e-06	-0.216045	-0.216048	8.36541	0.518081	1	-0.494176	-0.494182	8.36541	6.20969e-05	0.00486191	-0.270504	-0.270507	8.36541	0.2148	0.796559	-0.121708	-0.12171	8.36541	0.916672	1	0.174497	0.1745	8.36541	0.744443	1	0.182124	0.182127	8.36541	0.707907	0.995284	-0.00762714	-0.00762725	8.36541	0.998712	1	0.0527888	0.0527896
11988	Slc7a2	solute carrier family 7 (cationic amino acid transporter, y+ system), member 2	-0.559356	-0.559414	5.51077	0.000859486	0.0112919	-0.468594	-0.468641	5.51077	0.00721166	0.0505118	-0.0907613	-0.0907723	5.51077	0.804433	1	0.291686	0.291717	5.51077	0.176778	0.66512	0.609189	0.609251	5.51077	0.000252893	0.013436	0.0920163	0.0920244	5.51077	0.806909	1	-0.176908	-0.176924	5.51077	0.540097	0.943864	0.0498333	0.0498375	5.51077	0.905184	1	-0.226741	-0.226761	5.51077	0.364695	0.946435	-0.0848916	-0.0848994
11994	Pcdh15	protocadherin 15	-1.14973	-1.15033	2.73017	0.000632381	0.00882368	-0.867934	-0.868336	2.73017	0.00742372	0.0515502	-0.281801	-0.281993	2.73017	0.36544	1	-0.647763	-0.648268	2.73017	0.0430988	0.34375	-0.74476	-0.745479	2.73017	0.0225844	0.26648	1.01151	1.01201	2.73017	0.00210227	0.120641	-1.5157	-1.5166	2.73017	2.44702e-05	0.000814508	-1.89449	-1.89581	2.73017	1.04663e-06	6.52927e-05	0.378798	0.379204	2.73017	0.232372	0.825315	-0.504187	-0.504597
12014	Bach2	BTB and CNC homology, basic leucine zipper transcription factor 2	-0.4794	-0.479449	5.34237	0.0122742	0.084836	-0.520391	-0.520446	5.34237	0.00578641	0.0427438	0.0409914	0.0409964	5.34237	0.893964	1	-0.173027	-0.17305	5.34237	0.50859	0.984334	0.295627	0.295659	5.34237	0.181617	0.748378	0.153892	0.153906	5.34237	0.571525	1	-0.693419	-0.693496	5.34237	0.000175639	0.00406787	-0.183773	-0.183791	5.34237	0.478292	0.867674	-0.509645	-0.509705	5.34237	0.00722793	0.140202	-0.539526	-0.53959
12032	Bcan	brevican	-0.273616	-0.273617	9.96032	0.176912	0.493833	-0.273955	-0.273956	9.96032	0.17482	0.456192	0.000339093	0.000339094	9.96032	0.999999	1	-0.481407	-0.48141	9.96032	6.15224e-07	0.000185903	0.00252359	0.0025236	9.96032	0.999992	1	-0.243216	-0.243217	9.96032	0.419559	1	-0.755362	-0.755366	9.96032	4.15006e-13	1.95751e-10	-0.271093	-0.271094	9.96032	0.192976	0.574413	-0.48427	-0.484272	9.96032	5.10538e-07	0.000253162	-0.998579	-0.998583
12035	Bcat1	branched chain aminotransferase 1, cytosolic	0.388035	0.388055	6.62253	0.0153173	0.0997375	0.407252	0.407273	6.62253	0.00872703	0.0580771	-0.0192173	-0.0192181	6.62253	0.987267	1	0.0201136	0.0201145	6.62253	0.986719	1	0.12511	0.125115	6.62253	0.828789	1	-0.353523	-0.353541	6.62253	0.0388141	0.501957	0.427366	0.427387	6.62253	0.00469102	0.0521078	0.513145	0.513169	6.62253	0.000271865	0.00590741	-0.0857787	-0.0857823	6.62253	0.916337	1	0.0738427	0.073846
12038	Bche	butyrylcholinesterase	1.40316	1.40633	1.22566	0.00276139	0.0274845	1.22786	1.23079	1.22566	0.00768877	0.0528592	0.175291	0.175542	1.22566	0.680776	1	0.256389	0.256745	1.22566	0.546365	1	-1.17826	-1.18067	1.22566	0.00981105	0.163565	0.0783644	0.0786306	1.22566	0.859198	1	1.48425	1.48754	1.22566	0.00166061	0.0239482	0.2249	0.225666	1.22566	0.608018	0.948766	1.25935	1.26187	1.22566	0.00603832	0.126398	1.56262	1.56617
12039	Bckdha	branched chain ketoacid dehydrogenase E1, alpha polypeptide	-0.410595	-0.41061	6.97793	0.00350462	0.0330775	-0.283558	-0.283567	6.97793	0.166194	0.441882	-0.127038	-0.127043	6.97793	0.880731	1	-0.0354551	-0.0354565	6.97793	0.988856	1	0.219929	0.219938	6.97793	0.475367	1	-0.196199	-0.196205	6.97793	0.60833	1	-0.319013	-0.319024	6.97793	0.0702798	0.341772	-0.190666	-0.190672	6.97793	0.636667	0.962749	-0.128347	-0.128352	6.97793	0.878133	1	-0.515212	-0.515229
12041	Bckdk	branched chain ketoacid dehydrogenase kinase	-0.0919666	-0.0919697	7.15907	0.927329	1	-0.00467233	-0.00467248	7.15907	0.997998	1	-0.0872943	-0.0872972	7.15907	0.933887	1	-0.0933946	-0.0933978	7.15907	0.924593	1	0.287672	0.287681	7.15907	0.158616	0.705489	-0.36761	-0.367621	7.15907	0.0209065	0.378214	-0.098067	-0.0980702	7.15907	0.917299	1	0.195706	0.195712	7.15907	0.582011	0.933299	-0.293773	-0.293782	7.15907	0.139929	0.672655	-0.465677	-0.465691
12043	Bcl2	B cell leukemia/lymphoma 2	-1.15326	-1.15332	6.56716	1.63109e-10	2.79147e-08	-1.15101	-1.15107	6.56716	1.73991e-10	2.44072e-08	-0.00225155	-0.00225175	6.56716	0.996947	1	0.327382	0.327403	6.56716	0.0932533	0.498973	0.795151	0.795194	6.56716	4.16487e-07	0.000110095	0.17728	0.177286	6.56716	0.577775	1	-0.823629	-0.823664	6.56716	1.7699e-07	1.25839e-05	-0.358112	-0.358125	6.56716	0.0506807	0.264616	-0.465517	-0.465539	6.56716	0.00407229	0.100938	-0.646349	-0.646378
12045	Bcl2a1b	B cell leukemia/lymphoma 2 related protein A1b	1.85516	1.85748	2.04104	3.17981e-05	0.000761069	1.02916	1.03079	2.04104	0.0102857	0.0656051	0.826	0.826689	2.04104	0.0324188	0.660641	0.114193	0.114312	2.04104	0.760945	1	-0.516658	-0.517044	2.04104	0.170879	0.729421	-0.0278398	-0.0278855	2.04104	0.94314	1	1.14335	1.1451	2.04104	0.00474321	0.0525667	1.3385	1.34044	2.04104	0.0012277	0.0191781	-0.195148	-0.195333	2.04104	0.601678	1	1.11551	1.11722
12047	Bcl2a1d	B cell leukemia/lymphoma 2 related protein A1d	7.01637	9.98935	-0.887574	0.000139979	0.00255142	7.27546	10.25	-0.887574	9.19452e-05	0.00166025	-0.259086	-0.26069	-0.887574	0.79287	1	-0.511045	-0.514511	-0.887574	0.606274	1	0.0404691	0.0406991	-0.887574	0.967344	1	-5.99103	-8.95363	-0.887574	0.000796622	0.0643407	6.76442	9.73553	-0.887574	0.00021016	0.00474799	7.05684	10.0301	-0.887574	0.000130609	0.00330609	-0.292428	-0.294519	-0.887574	0.767847	1	0.773385	0.781903
12051	Bcl3	B cell leukemia/lymphoma 3	4.79325	4.81909	1.30747	4.51597e-07	2.2451e-05	4.40205	4.42759	1.30747	1.45196e-06	5.0142e-05	0.391202	0.391498	1.30747	0.498994	1	-3.72865	-3.74399	1.30747	1.03145e-05	0.0014147	-2.53499	-2.53951	1.30747	0.000329718	0.0162664	-1.90707	-1.92678	1.30747	0.0107574	0.2836	0.673398	0.683598	1.30747	0.369997	0.817581	2.25826	2.27958	1.30747	0.00288474	0.0366303	-1.58486	-1.59598	1.30747	0.0257069	0.294428	-1.23367	-1.24319
12057	Opn1sw	opsin 1 (cone pigments), short-wave-sensitive (color blindness, tritan)	-0.4428	-0.443212	2.03231	0.196254	0.524148	-0.352182	-0.352499	2.03231	0.300776	0.623842	-0.0906182	-0.0907129	2.03231	0.790474	1	-0.873213	-0.874429	2.03231	0.0162185	0.204149	-0.608161	-0.608985	2.03231	0.086488	0.546956	0.121836	0.121938	2.03231	0.717154	1	-1.22539	-1.22693	2.03231	0.00109938	0.0175131	-1.05096	-1.0522	2.03231	0.00408263	0.0469965	-0.174433	-0.174732	2.03231	0.618469	1	-1.10356	-1.10499
12062	Bdkrb2	bradykinin receptor, beta 2	2.68015	2.69349	1.14414	6.67763e-06	0.000213452	3.24181	3.25591	1.14414	4.16307e-07	1.70211e-05	-0.561651	-0.562422	1.14414	0.207377	1	-0.796043	-0.797238	1.14414	0.0781714	0.464299	-0.418194	-0.419007	1.14414	0.353359	0.947929	-2.3091	-2.32173	1.14414	4.48825e-05	0.00953826	2.44576	2.45868	1.14414	2.23961e-05	0.000753248	2.26196	2.27448	1.14414	6.41419e-05	0.00188517	0.183802	0.184191	1.14414	0.682136	1	0.136667	0.136942
12064	Bdnf	brain derived neurotrophic factor	0.418637	0.418803	3.44087	0.0600645	0.252355	0.644707	0.644944	3.44087	0.00273687	0.0240802	-0.22607	-0.226141	3.44087	0.349587	1	-0.869399	-0.869748	3.44087	8.92323e-05	0.00622983	-0.0707476	-0.0707719	3.44087	0.784581	1	0.410348	0.410565	3.44087	0.0678864	0.640417	-0.224693	-0.224804	3.44087	0.353434	0.802549	0.347889	0.348031	3.44087	0.127409	0.456414	-0.572582	-0.572835	3.44087	0.008295	0.151449	0.185655	0.185761
12068	Bet1	Bet1 golgi vesicular membrane trafficking protein	-0.440837	-0.440874	5.6976	0.0167791	0.106565	-0.507387	-0.507431	5.6976	0.00432504	0.0340285	0.0665503	0.066557	5.6976	0.848131	1	0.170139	0.170156	5.6976	0.542368	0.999664	0.0452383	0.0452428	5.6976	0.900145	1	-0.271877	-0.271895	5.6976	0.228018	0.956722	-0.337248	-0.337275	5.6976	0.097977	0.418367	-0.395598	-0.395632	5.6976	0.0383361	0.220912	0.0583507	0.0583562	5.6976	0.870139	1	-0.609125	-0.609171
121021	Cspg4	chondroitin sulfate proteoglycan 4	1.1067	1.1071	3.65916	5.15614e-06	0.000174326	1.02123	1.02161	3.65916	1.6937e-05	0.000395108	0.0854672	0.0854883	3.65916	0.738441	1	-0.667567	-0.667783	3.65916	0.00266452	0.0666026	-0.583588	-0.58376	3.65916	0.00844004	0.149197	0.043262	0.0432869	3.65916	0.866172	1	0.353662	0.353824	3.65916	0.129462	0.48757	0.523108	0.523336	3.65916	0.0197205	0.143428	-0.169446	-0.169511	3.65916	0.496086	1	0.396924	0.397111
12111	Bgn	biglycan	1.4181	1.41844	4.35666	1.83121e-08	1.48175e-06	1.58117	1.58153	4.35666	2.12938e-09	2.04876e-07	-0.16307	-0.163092	4.35666	0.515824	1	-0.895366	-0.895523	4.35666	3.49598e-05	0.00328198	-1.13502	-1.13526	4.35666	1.07633e-06	0.000228738	-0.10713	-0.10717	4.35666	0.676025	1	0.685801	0.686008	4.35666	0.00123172	0.0191351	0.283082	0.28318	4.35666	0.226059	0.624674	0.40272	0.402828	4.35666	0.0684436	0.485024	0.578671	0.578838
12121	Bicd1	BICD cargo adaptor 1	-0.534326	-0.534397	5.09401	0.00421061	0.0382476	-0.353159	-0.353202	5.09401	0.088466	0.293614	-0.181168	-0.181194	5.09401	0.485707	1	0.357602	0.357646	5.09401	0.0833008	0.475278	0.139023	0.139044	5.09401	0.61708	1	0.256313	0.256344	5.09401	0.269917	1	0.00444375	0.00444419	5.09401	0.989047	1	-0.395304	-0.395353	5.09401	0.0478712	0.254336	0.399747	0.399797	5.09401	0.044749	0.396432	0.260757	0.260788
12122	Bid	BH3 interacting domain death agonist	0.71369	0.713869	4.22458	0.00033915	0.00535851	0.78304	0.783232	4.22458	9.45206e-05	0.00170199	-0.06935	-0.0693632	4.22458	0.801187	1	-0.441029	-0.441124	4.22458	0.0332756	0.299728	-0.363068	-0.363148	4.22458	0.0922794	0.564432	-0.231599	-0.231667	4.22458	0.332823	1	0.342011	0.342108	4.22458	0.118713	0.464642	0.350622	0.350721	4.22458	0.107423	0.41433	-0.00861096	-0.00861366	4.22458	0.975344	1	0.110412	0.110441
12123	Hrk	harakiri, BCL2 interacting protein (contains only BH3 domain)	0.872502	0.872705	4.20364	0.000115237	0.00217633	0.633847	0.634007	4.20364	0.00405649	0.0323499	0.238655	0.238699	4.20364	0.322833	1	-0.257112	-0.257169	4.20364	0.283459	0.808885	-0.792609	-0.79279	4.20364	0.000388277	0.0184494	-0.0794236	-0.0794476	4.20364	0.756376	1	0.376735	0.376838	4.20364	0.100877	0.42456	0.0798927	0.0799159	4.20364	0.754952	1	0.296842	0.296922	4.20364	0.209243	0.792109	0.297311	0.29739
12140	Fabp7	fatty acid binding protein 7, brain	-0.504312	-0.504312	12.1017	0.000194576	0.00337784	-0.481912	-0.481912	12.1017	0.000446087	0.00597428	-0.0223997	-0.0223997	12.1017	0.989586	1	-0.253643	-0.253643	12.1017	0.290755	0.815862	-0.204807	-0.204808	12.1017	0.533162	1	-0.223102	-0.223103	12.1017	0.439429	1	-0.735555	-0.735555	12.1017	4.63807e-08	4.04885e-06	-0.709119	-0.70912	12.1017	1.12556e-07	9.58909e-06	-0.0264357	-0.0264357	12.1017	0.987498	1	-0.958657	-0.958658
12151	Bmi1	Bmi1 polycomb ring finger oncogene	0.398278	0.398293	6.88175	0.0661261	0.268489	0.0476902	0.0476923	6.88175	0.858578	1	0.350587	0.350601	6.88175	0.114395	0.975248	0.660152	0.660175	6.88175	0.00132727	0.0426379	-0.549204	-0.549226	6.88175	0.00813183	0.145747	-0.100337	-0.100341	6.88175	0.70174	1	0.707843	0.707867	6.88175	0.000580743	0.0107064	-0.150926	-0.150933	6.88175	0.552094	0.91763	0.858769	0.8588	6.88175	4.53141e-05	0.0043967	0.607505	0.607525
12161	Bmp6	bone morphogenetic protein 6	-0.627403	-0.627441	6.14563	9.42554e-06	0.000285949	-0.55698	-0.557013	6.14563	9.54515e-05	0.00171237	-0.0704228	-0.070428	6.14563	0.925646	1	-0.169977	-0.16999	6.14563	0.648124	1	0.493007	0.493039	6.14563	0.000801167	0.0304995	0.10676	0.106766	6.14563	0.860631	1	-0.726957	-0.727004	6.14563	3.95817e-07	2.47725e-05	-0.134395	-0.134402	6.14563	0.784563	1	-0.592562	-0.592602	6.14563	3.09113e-05	0.00335839	-0.620197	-0.620238
12162	Bmp7	bone morphogenetic protein 7	-0.607706	-0.607894	3.54668	0.023826	0.136282	-0.973732	-0.974079	3.54668	0.00066885	0.00818665	0.366027	0.366185	3.54668	0.177819	1	-0.0583508	-0.0583801	3.54668	0.8322	1	0.142675	0.142726	3.54668	0.59988	1	0.792993	0.793257	3.54668	0.00391433	0.166575	-1.03208	-1.03246	3.54668	0.000354458	0.0072966	-0.465031	-0.465168	3.54668	0.0813424	0.352346	-0.567052	-0.567291	3.54668	0.0367798	0.358691	-0.23909	-0.239203
12166	Bmpr1a	bone morphogenetic protein receptor, type 1A	-0.660644	-0.660662	7.28487	4.42194e-07	2.20744e-05	-0.871261	-0.871288	7.28487	5.24425e-10	6.22468e-08	0.210618	0.210626	7.28487	0.507748	1	0.341084	0.341096	7.28487	0.0438235	0.346202	0.128498	0.128502	7.28487	0.853888	1	-0.148962	-0.148965	7.28487	0.792729	1	-0.530178	-0.530192	7.28487	5.78563e-05	0.001665	-0.532146	-0.53216	7.28487	5.40766e-05	0.00165473	0.00196826	0.00196833	7.28487	0.999218	1	-0.679139	-0.679157
12167	Bmpr1b	bone morphogenetic protein receptor, type 1B	0.93243	0.933029	2.71687	0.00222086	0.0231907	0.306369	0.30661	2.71687	0.289057	0.61047	0.62606	0.626419	2.71687	0.0315286	0.654761	-0.0983853	-0.0984574	2.71687	0.733427	1	-0.50866	-0.508939	2.71687	0.0769646	0.521155	-0.155154	-0.155282	2.71687	0.591565	1	0.207984	0.208153	2.71687	0.471024	0.897097	0.42377	0.42409	2.71687	0.142014	0.485747	-0.215786	-0.215937	2.71687	0.453373	1	0.0528295	0.0528708
12177	Bnip3l	BCL2/adenovirus E1B interacting protein 3-like	-0.271648	-0.271652	8.08979	0.216269	0.553303	-0.372285	-0.372292	8.08979	0.0203552	0.107144	0.100638	0.10064	8.08979	0.902777	1	0.0961101	0.0961119	8.08979	0.911346	1	0.0173501	0.0173504	8.08979	0.990936	1	-0.159492	-0.159494	8.08979	0.733006	1	-0.276175	-0.27618	8.08979	0.199623	0.610648	-0.254297	-0.254301	8.08979	0.286855	0.696834	-0.0218779	-0.0218782	8.08979	0.988442	1	-0.435668	-0.435674
12181	Bop1	block of proliferation 1	0.493747	0.493773	6.43451	0.00162633	0.0182329	0.572954	0.572984	6.43451	0.000162253	0.00262835	-0.0792073	-0.0792108	6.43451	0.883509	1	-0.378314	-0.378332	6.43451	0.0315224	0.29252	0.00466532	0.00466552	6.43451	0.994435	1	-0.13007	-0.130078	6.43451	0.752068	1	0.19464	0.194652	6.43451	0.513052	0.926387	0.498412	0.498439	6.43451	0.00141649	0.0214515	-0.303772	-0.303787	6.43451	0.136014	0.66454	0.0645705	0.0645742
12183	Bpgm	2,3-bisphosphoglycerate mutase	0.456323	0.456341	6.7388	0.00187778	0.0203337	0.470379	0.470398	6.7388	0.00117872	0.0127135	-0.0140559	-0.0140564	6.7388	0.990791	1	-0.331766	-0.331778	6.7388	0.0661415	0.427619	-0.460719	-0.460738	6.7388	0.00163848	0.0492791	-0.0357778	-0.0357795	6.7388	0.974488	1	0.138613	0.138619	6.7388	0.785958	1	-0.00439628	-0.0043965	6.7388	0.997116	1	0.143009	0.143016	6.7388	0.770823	1	0.102835	0.10284
12189	Brca1	breast cancer 1, early onset	0.452543	0.452698	3.92392	0.0674316	0.271679	0.646817	0.647024	3.92392	0.00879616	0.0583564	-0.194273	-0.194326	3.92392	0.446905	1	-0.0257711	-0.0257778	3.92392	0.920888	1	0.265509	0.265579	3.92392	0.292627	0.890777	-0.158887	-0.158947	3.92392	0.536827	1	0.621046	0.621246	3.92392	0.0116325	0.101384	0.718053	0.718277	3.92392	0.003752	0.044352	-0.0970072	-0.0970312	3.92392	0.707003	1	0.462159	0.462299
12193	Zfp36l2	zinc finger protein 36, C3H type-like 2	-0.306717	-0.306739	5.739	0.132943	0.41866	-0.650831	-0.650883	5.739	2.6224e-05	0.000576959	0.344114	0.344144	5.739	0.0700861	0.839774	-0.152216	-0.152232	5.739	0.658807	1	-0.488008	-0.488054	5.739	0.00256764	0.0684905	-0.0441013	-0.044104	5.739	0.937497	1	-0.803047	-0.803115	5.739	4.00326e-07	2.48138e-05	-0.794725	-0.794792	5.739	5.00133e-07	3.42065e-05	-0.00832145	-0.00832233	5.739	0.988195	1	-0.847148	-0.847219
12211	Birc6	baculoviral IAP repeat-containing 6	-0.343407	-0.343444	5.23057	0.0952622	0.33782	-0.606084	-0.606156	5.23057	0.000693002	0.00842361	0.262678	0.262712	5.23057	0.253203	1	0.43872	0.438775	5.23057	0.0208729	0.235921	0.0356148	0.0356192	5.23057	0.915921	1	0.438017	0.438066	5.23057	0.0206534	0.37798	-0.167364	-0.167381	5.23057	0.542768	0.945383	-0.307792	-0.307824	5.23057	0.151999	0.50406	0.140427	0.140443	5.23057	0.627535	1	0.270653	0.270685
12212	Chic1	cysteine-rich hydrophobic domain 1	-0.167518	-0.167587	3.74958	0.505645	0.850319	-0.44191	-0.442108	3.74958	0.0631365	0.234737	0.274392	0.274521	3.74958	0.266209	1	1.18557	1.18599	3.74958	5.1861e-06	0.000849949	0.501612	0.501794	3.74958	0.033081	0.332333	-0.613195	-0.613385	3.74958	0.00836021	0.252622	0.74366	0.743881	3.74958	0.00147522	0.0220393	0.334094	0.334207	3.74958	0.164678	0.527628	0.409566	0.409675	3.74958	0.0827428	0.536607	0.130465	0.130496
12217	Bsn	bassoon	0.0644609	0.0644821	3.80368	0.80327	1	0.236698	0.236772	3.80368	0.325042	0.652277	-0.172237	-0.17229	3.80368	0.488049	1	0.177597	0.177645	3.80368	0.473536	0.960129	0.0908898	0.0909192	3.80368	0.723352	1	0.436294	0.436465	3.80368	0.0504486	0.555291	0.414295	0.414417	3.80368	0.06294	0.317707	0.155351	0.155401	3.80368	0.53505	0.906884	0.258945	0.259016	3.80368	0.276137	0.874011	0.850589	0.850882
12224	Klf5	Kruppel-like factor 5	1.49208	1.49348	2.18271	0.000373656	0.00579481	1.45273	1.45411	2.18271	0.000492942	0.00645868	0.0393485	0.0393695	2.18271	0.914999	1	-1.72851	-1.73035	2.18271	8.3978e-05	0.00599281	-1.40516	-1.40643	2.18271	0.000710209	0.0283651	0.302871	0.303393	2.18271	0.435665	1	-0.275779	-0.276239	2.18271	0.477854	0.901882	0.0869206	0.0870511	2.18271	0.819759	1	-0.362699	-0.36329	2.18271	0.352677	0.937958	0.0270925	0.0271538
12226	Btg1	B cell translocation gene 1, anti-proliferative	-0.576102	-0.576115	7.56569	4.15075e-06	0.000145419	-0.773384	-0.773403	7.56569	2.76829e-09	2.56153e-07	0.197282	0.197288	7.56569	0.601958	1	0.157245	0.15725	7.56569	0.788615	1	0.0255943	0.025595	7.56569	0.992777	1	-0.149517	-0.149519	7.56569	0.81933	1	-0.616139	-0.616153	7.56569	8.26762e-07	4.62103e-05	-0.550507	-0.55052	7.56569	1.16896e-05	0.000488626	-0.0656317	-0.0656335	7.56569	0.973378	1	-0.765656	-0.765672
12229	Btk	Bruton agammaglobulinemia tyrosine kinase	1.64407	1.64778	1.06401	0.0034361	0.0326219	0.850469	0.852902	1.06401	0.107969	0.334833	0.793598	0.794882	1.06401	0.12607	0.985871	-0.0935684	-0.0937727	1.06401	0.855057	1	-1.32444	-1.32706	1.06401	0.0148328	0.20984	-0.745949	-0.74815	1.06401	0.156369	0.859272	0.756901	0.759129	1.06401	0.15063	0.528614	0.319629	0.320725	1.06401	0.539533	0.909572	0.437271	0.438404	1.06401	0.399484	0.97141	0.010952	0.0109791
[truncated: 4,700 more rows]
[truncated: 8 more columns]
