# Supplementary material for: PI3K-Yap activity drives cortical gyrification and hydrocephalus in mice
Source: eLife. 2019 May 16;8:e45961. doi: 10.7554/eLife.45961 (PMC6544437; doi:10.7554/eLife.45961)
Supplement: Figure 6—source data 2. [file elife-45961-fig6-data2.xlsx]

## Sheet: gene enrichment list
Figure 6 - Source Data 2: Gene lists used in gene set enrichment analyses
PI3K pathway enrichment (GO:0043491):
ENTREZ ID	SYMBOL	GENE NAME
11501	Adam8	a disintegrin and metallopeptidase domain 8
329828	AI464131	expressed sequence AI464131
11651	Akt1	thymoma viral proto-oncogene 1
11652	Akt2	thymoma viral proto-oncogene 2
11600	Angpt1	angiopoietin 1
211673	Arfgef1	ADP-ribosylation factor guanine nucleotide-exchange factor 1(brefeldin A-inhibited)
216869	Arrb2	arrestin, beta 2
26362	Axl	AXL receptor tyrosine kinase
67384	Bag4	BCL2-associated athanogene 4
242248	Bank1	B cell scaffold protein with ankyrin repeats 1
238555	Btn2a2	butyrophilin, subfamily 2, member A2
12261	C1qbp	complement component 1, q subcomponent binding protein
56745	C1qtnf1	C1q and tumor necrosis factor related protein 1
67389	C1qtnf12	C1q and tumor necrosis factor related 12
81799	C1qtnf3	C1q and tumor necrosis factor related protein 3
109042	Cavin3	caveolae associated 3
20293	Ccl12	chemokine (C-C motif) ligand 12
12487	Cd28	CD28 antigen
21939	Cd40	CD40 antigen
12654	Chil1	chitinase-like 1								Su
23991	Cib1	calcium and integrin binding 1 (calmyrin)
56708	Clcf1	cardiotrophin-like cytokine factor 1
266692	Cpne1	copine I
13138	Dag1	dystroglycan 1
13198	Ddit3	DNA-damage inducible transcript 3
13383	Dlg1	discs large MAGUK scaffold protein 1
13489	Drd2	dopamine receptor D2
13490	Drd3	dopamine receptor D3
13649	Egfr	epidermal growth factor receptor
13805	Eng	endoglin
328572	Ep300	E1A binding protein p300
13836	Epha2	Eph receptor A2
14058	F10	coagulation factor X
14066	F3	coagulation factor III
14173	Fgf2	fibroblast growth factor 2
216805	Flcn	folliculin
14456	Gas6	growth arrest specific 6
14462	Gata3	GATA binding protein 3
14538	Gcnt2	glucosaminyl (N-acetyl) transferase 2, I-branching enzyme
76854	Gper1	G protein-coupled estrogen receptor 1
14775	Gpx1	glutathione peroxidase 1
23897	Hax1	HCLS1 associated X-1
15200	Hbegf	heparin-binding EGF-like growth factor
15163	Hcls1	hematopoietic cell specific Lyn substrate 1
15182	Hdac2	histone deacetylase 2
15442	Hpse	heparanase
15587	Hyal2	hyaluronoglucosaminidase 2
16000	Igf1	insulin-like growth factor 1
16001	Igf1r	insulin-like growth factor I receptor
16002	Igf2	insulin-like growth factor 2
16011	Igfbp5	insulin-like growth factor binding protein 5
16173	Il18	interleukin 18
16176	Il1b	interleukin 1 beta
16202	Ilk	integrin linked kinase
234515	Inpp4b	inositol polyphosphate-4-phosphatase, type II
101490	Inpp5f	inositol polyphosphate-5-phosphatase F
19062	Inpp5k	inositol polyphosphate 5-phosphatase K
16337	Insr	insulin receptor
16367	Irs1	insulin receptor substrate 1
16412	Itgb1	integrin beta 1 (fibronectin receptor beta)
16413	Itgb1bp1	integrin beta 1 binding protein 1
16443	Itsn1	intersectin 1 (SH3 domain protein 1A)
16542	Kdr	kinase insert domain protein receptor
16600	Klf4	Kruppel-like factor 4 (gut)
224640	Lemd2	LEM domain containing 2
235402	Lingo1	leucine rich repeat and Ig domain containing 1
68421	Lmbrd1	LMBR1 domain containing 1
50791	Magi2	membrane associated guanylate kinase, WW and PDZ domain containing 2
17199	Mc1r	melanocortin 1 receptor
17537	Meis3	Meis homeobox 3
17289	Mertk	c-mer proto-oncogene tyrosine kinase
19882	Mst1r	macrophage stimulating 1 receptor (c-met-related tyrosine kinase)
67154	Mtdh	metadherin
17772	Mtm1	X-linked myotubular myopathy gene 1
56717	Mtor	mechanistic target of rapamycin kinase
68350	Mul1	mitochondrial ubiquitin ligase activator of NFKB 1
28106	Mydgf	myeloid derived growth factor
17926	Myoc	myocilin
18053	Ngfr	nerve growth factor receptor (TNFR superfamily, member 16)
68077	Nop53	NOP53 ribosome biogenesis factor
50490	Nox4	NADPH oxidase 4
211323	Nrg1	neuregulin 1
18189	Nrxn1	neurexin I
18212	Ntrk2	neurotrophic tyrosine kinase, receptor, type 2
237542	Osbpl8	oxysterol binding protein-like 8
73162	Otud3	OTU domain containing 3
70839	P2ry12	purinergic receptor P2Y, G-protein coupled 12
18570	Pdcd6	programmed cell death 6
18590	Pdgfa	platelet derived growth factor, alpha
73182	Pear1	platelet endothelial aggregation receptor 1
27280	Phlda3	pleckstrin homology like domain, family A, member 3
98432	Phlpp1	PH domain and leucine rich repeat protein phosphatase 1
240752	Pik3c2b	phosphatidylinositol-4-phosphate 3-kinase catalytic subunit type 2 beta
18706	Pik3ca	phosphatidylinositol-4,5-bisphosphate 3-kinase catalytic subunit alpha
30955	Pik3cg	phosphatidylinositol-4,5-bisphosphate 3-kinase catalytic subunit gamma
101476	Plekha1	pleckstrin homology domain containing, family A (phosphoinositide binding specific) member 1
12795	Plk3	polo like kinase 3
19211	Pten	phosphatase and tensin homolog
14083	Ptk2	PTK2 protein tyrosine kinase 2
19271	Ptprj	protein tyrosine phosphatase, receptor type, J
14694	Rack1	receptor for activated C kinase 1
56089	Ramp3	receptor (calcitonin) activity modifying protein 3
107746	Rapgef1	Rap guanine nucleotide exchange factor (GEF) 1
19401	Rara	retinoic acid receptor, alpha
75141	Rasd2	RASD family, member 2
78757	Rictor	RPTOR independent companion of MTOR, complex 2
67588	Rnf41	ring finger protein 41
72508	Rps6kb1	ribosomal protein S6 kinase, polypeptide 1
58988	Rps6kb2	ribosomal protein S6 kinase, polypeptide 2
20130	Rras	related RAS viral (r-ras) oncogene
68585	Rtn4	reticulon 4
20356	Sema5a	sema domain, seven thrombospondin repeats (type 1 and type 1-like), transmembrane domain (TM) and short cytoplasmic domain, (semaphorin) 5A
140742	Sesn1	sestrin 1
230784	Sesn2	sestrin 2
75747	Sesn3	sestrin 3
269254	Setx	senataxin
54612	Sfrp5	secreted frizzled-related sequence protein 5
93759	Sirt1	sirtuin 1
64383	Sirt2	sirtuin 2
26941	Slc9a3r1	solute carrier family 9 (sodium/hydrogen exchanger), member 3 regulator 1
20682	Sox9	SRY (sex determining region Y)-box 9
24064	Spry2	sprouty RTK signaling antagonist 2
20779	Src	Rous sarcoma oncogene
20869	Stk11	serine/threonine kinase 11
56274	Stk3	serine/threonine kinase 3
216021	Stox1	storkhead box 1
21416	Tcf7l2	transcription factor 7 like 2, T cell specific, HMG box
21687	Tek	TEK receptor tyrosine kinase
21803	Tgfb1	transforming growth factor, beta 1
21812	Tgfbr1	transforming growth factor, beta receptor I
21825	Thbs1	thrombospondin 1
75778	Them4	thioesterase superfamily member 4
21832	Thpo	thrombopoietin
67888	Tmem100	transmembrane protein 100
21926	Tnf	tumor necrosis factor
244882	Tnfaip8l3	tumor necrosis factor, alpha-induced protein 8-like 3
22084	Tsc2	tuberous sclerosis 2
239364	Tspyl5	testis-specific protein, Y-encoded-like 5
22174	Tyro3	TYRO3 protein tyrosine kinase 3
22339	Vegfa	vascular endothelial growth factor A
22340	Vegfb	vascular endothelial growth factor B
12192	Zfp36l1	zinc finger protein 36, C3H type-like 1
Hippo-Yap pathway enrichment (GO:0035329):
ENTREZID	Symbol	GENE NAME
16475	Ajuba	ajuba LIM protein
27494	Amot	angiomotin
75723	Amotl1	angiomotin-like 1
56332	Amotl2	angiomotin-like 2
233651	Dchs1	dachsous cadherin related 1
71228	Dlg5	discs large MAGUK scaffold protein 5
329628	Fat4	FAT atypical cadherin 4
16798	Lats1	large tumor suppressor
50523	Lats2	large tumor suppressor 2
29806	Limd1	LIM domains containing 1
53859	Map3k14	mitogen-activated protein kinase kinase kinase 14
17169	Mark3	MAP/microtubule affinity regulating kinase 3
232157	Mob1a	MOB kinase activator 1A
68473	Mob1b	MOB kinase activator 1B
140859	Nek8	NIMA (never in mitosis gene a)-related expressed kinase 8
18016	Nf2	neurofibromin 2
224938	Pja2	praja ring finger ubiquitin ligase 2
64010	Sav1	salvador family WW domain containing 1
20666	Sox11	SRY (sex determining region Y)-box 11
56274	Stk3	serine/threonine kinase 3
58231	Stk4	serine/threonine kinase 4
21676	Tead1	TEA domain family member 1
21677	Tead2	TEA domain family member 2
21678	Tead3	TEA domain family member 3
101543	Wtip	WT1-interacting protein
211652	Wwc1	WW, C2 and coiled-coil domain containing 1
52357	Wwc2	WW, C2 and coiled-coil domain containing 2
97064	Wwtr1	WW domain containing transcription regulator 1
22601	Yap1	yes-associated protein 1
Ferret-related gyrification gene enrichment (GSE60687):
ENTREZID	Symbol	GENENAME
632687	2018-03-10	membrane-associated ring finger (C3HC4) 10
192663	Abcg4	ATP binding cassette subfamily G member 4
14081	Acsl1	acyl-CoA synthetase long-chain family member 1
269275	Acvr1c	activin A receptor, type IC
23794	Adamts5	a disintegrin-like and metallopeptidase (reprolysin type) with thrombospondin type 1 motif, 5 (aggrecanase-2)
30806	Adamts8	a disintegrin-like and metallopeptidase (reprolysin type) with thrombospondin type 1 motif, 8
210044	Adcy2	adenylate cyclase 2
11516	Adcyap1	adenylate cyclase activating polypeptide 1
216439	Agap2	ArfGAP with GTPase domain, ankyrin repeat and PH domain 2
11639	Ak4	adenylate kinase 4
71371	Arid5b	AT rich interactive domain 5B (MRF1-like)
76294	Asb5	ankyrin repeat and SOCs box-containing 5
320707	Atp2b3	ATPase, Ca++ transporting, plasma membrane 3
231727	B3gnt4	UDP-GlcNAc:betaGal beta-1,3-N-acetylglucosaminyltransferase 4
79362	Bhlhe41	basic helix-loop-helix family, member e41
56710	Brinp1	bone morphogenic protein/retinoic acid inducible neural specific 1
215378	Brinp3	bone morphogenetic protein/retinoic acid inducible neural specific 3
12293	Cacna2d1	calcium channel, voltage-dependent, alpha2/delta subunit 1
12295	Cacnb1	calcium channel, voltage-dependent, beta 1 subunit
27062	Cadps	Ca2+-dependent secretion activator
12308	Calb2	calbindin 2
13136	Cd55	CD55 molecule, decay accelerating factor for complement
170677	Cdhr1	cadherin-related family member 1
75472	Cfap126	cilia and flagella associated protein 126
71870	Cfap45	cilia and flagella associated protein 45
380654	Cfap54	cilia and flagella associated protein 54
12628	Cfh	complement component factor h
21922	Clec3b	C-type lectin domain family 3, member b
12759	Clu	clusterin
12805	Cntn1	contactin 1
12814	Col11a1	collagen, type XI, alpha 1
12818	Col14a1	collagen, type XIV, alpha 1
12824	Col2a1	collagen, type II, alpha 1
12830	Col4a5	collagen, type IV, alpha 5
12919	Crhbp	corticotropin releasing hormone binding protein
12955	Cryab	crystallin, alpha B
12767	Cxcr4	chemokine (C-X-C motif) receptor 4
13131	Dab1	disabled 1
218581	Depdc1b	DEP domain containing 1B
23859	Dlg2	discs large MAGUK scaffold protein 2
224997	Dlgap1	DLG associated protein 1
13395	Dlx5	distal-less homeobox 5
99586	Dpyd	dihydropyrimidine dehydrogenase
381738	Drc1	dynein regulatory complex subunit 1
13527	Dtna	dystrobrevin alpha
13557	E2f3	E2F transcription factor 3
13612	Edil3	EGF-like repeats and discoidin I-like domains 3
13649	Egfr	epidermal growth factor receptor
13869	Erbb4	erb-b2 receptor tyrosine kinase 4
209601	Erich3	glutamate rich 3
23871	Ets1	E26 avian leukemia oncogene 1, 5' domain
70967	Eva1c	eva-1 homolog C (C. elegans)
320265	Fam19a1	family with sequence similarity 19, member A1
329628	Fat4	FAT atypical cadherin 4
233040	Fbxo27	F-box protein 27
30938	Fgd3	FYVE, RhoGEF and PH domain containing 3
60344	Fign	fidgetin
14226	Fkbp1b	FK506 binding protein 1b
71436	Flrt3	fibronectin leucine rich transmembrane protein 3
329872	Frem1	Fras1 related extracellular matrix protein 1
320365	Fry	FRY microtubule binding protein
14415	Gad1	glutamate decarboxylase 1
14417	Gad2	glutamic acid decarboxylase 2
230145	Galnt12	polypeptide N-acetylgalactosaminyltransferase 12
237891	Gas2l2	growth arrest-specific 2 like 2
14537	Gcnt1	glucosaminyl (N-acetyl) transferase 1, core 2
14538	Gcnt2	glucosaminyl (N-acetyl) transferase 2, I-branching enzyme
216456	Gls2	glutaminase 2 (liver, mitochondrial)
14696	Gnb4	guanine nucleotide binding protein (G protein), beta 4
381157	Greb1l	growth regulation by estrogen in breast cancer-like
14799	Gria1	glutamate receptor, ionotropic, AMPA1 (alpha 1)
74053	Grip1	glutamate receptor interacting protein 1
108069	Grm3	glutamate receptor, metabotropic 3
15483	Hsd11b1	hydroxysteroid 11-beta dehydrogenase 1
15507	Hspb1	heat shock protein 1
15550	Htr1a	5-hydroxytryptamine (serotonin) receptor 1A
15901	Id1	inhibitor of DNA binding 1
15939	Ier5	immediate early response 5
16011	Igfbp5	insulin-like growth factor binding protein 5
242553	Kank4	KN motif and ankyrin repeat domains 4
18519	Kat2b	K(lysine) acetyltransferase 2B
16485	Kcna1	potassium voltage-gated channel, shaker-related subfamily, member 1
16515	Kcnj12	potassium inwardly-rectifying channel, subfamily J, member 12
211480	Kcnj14	potassium inwardly-rectifying channel, subfamily J, member 14
72413	Kcnmb2	potassium large conductance calcium-activated channel, subfamily M, beta member 2
13992	Khdrbs3	KH domain containing, RNA binding, signal transduction associated 3
16551	Kif11	kinesin family member 11
16590	Kit	KIT proto-oncogene receptor tyrosine kinase
208628	Kntc1	kinetochore associated 1
52815	Ldhd	lactate dehydrogenase D
16876	Lhx9	LIM homeobox protein 9
268977	Ltbp1	latent transforming growth factor beta binding protein 1
26414	Mapk10	mitogen-activated protein kinase 10
240697	Mcmdc2	minichromosome maintenance domain containing 2
78771	Mctp1	multiple C2 domains, transmembrane 1
17268	Meis1	Meis homeobox 1
210029	Metrnl	meteorin, glial cell differentiation regulator-like
77521	Mtus2	microtubule associated tumor suppressor candidate 2
17869	Myc	myelocytomatosis oncogene
17916	Myo1f	myosin IF
260315	Nav3	neuron navigator 3
72787	Ndc1	NDC1 transmembrane nucleoporin
320840	Negr1	neuronal growth regulator 1
18088	Nkx2-2	NK2 homeobox 2
18142	Npas1	neuronal PAS domain protein 1
18164	Nptx1	neuronal pentraxin 1
18186	Nrp1	neuropilin 1
18187	Nrp2	neuropilin 2
18189	Nrxn1	neurexin I
18191	Nrxn3	neurexin III
18205	Ntf3	neurotrophin 3
18212	Ntrk2	neurotrophic tyrosine kinase, receptor, type 2
67405	Nts	neurotensin
18232	Nxph2	neurexophilin 2
71720	Osbpl3	oxysterol binding protein-like 3
52033	Pbk	PDZ binding kinase
219257	Pcdh20	protocadherin 20
18574	Pde1b	phosphodiesterase 1B, Ca2+-calmodulin dependent
72599	Pdia5	protein disulfide isomerase associated 5
56376	Pdlim5	PDZ and LIM domain 5
18610	Pdyn	prodynorphin
55983	Pdzrn3	PDZ domain containing RING finger 3
239618	Pdzrn4	PDZ domain containing RING finger 4
241062	Pgap1	post-GPI attachment to proteins 1
98496	Pid1	phosphotyrosine interaction domain containing 1
56711	Plag1	pleiomorphic adenoma gene 1
239318	Plcxd3	phosphatidylinositol-specific phospholipase C, X domain containing 3
102866	Pls3	plastin 3 (T-isoform)
19220	Ptgfr	prostaglandin F receptor
19270	Ptprg	protein tyrosine phosphatase, receptor type, G
19731	Rgl1	ral guanine nucleotide dissociation stimulator,-like 1
19733	Rgn	regucalcin
50779	Rgs6	regulator of G-protein signaling 6
66889	Rnf128	ring finger protein 128
225998	Rorb	RAR-related orphan receptor beta
12399	Runx3	runt related transcription factor 3
107815	Scml2	Scm polycomb group protein like 2
20971	Sdc4	syndecan 4
24053	Sgcg	sarcoglycan, gamma (dystrophin-associated glycoprotein)
72668	Skida1	SKI/DACH domain containing 1
108052	Slc14a1	solute carrier family 14 (urea transporter), member 1
73102	Slc22a23	solute carrier family 22, member 23
22348	Slc32a1	solute carrier family 32 (GABA vesicular transporter), member 1
277468	Slc39a12	solute carrier family 39 (zinc transporter), member 12
24059	Slco2a1	solute carrier organic anion transporter family, member 2a1
245450	Slitrk2	SLIT and NTRK-like family, member 2
223920	Soat2	sterol O-acyltransferase 2
13602	Sparcl1	SPARC-like 1
51795	Srpx	sushi-repeat-containing protein
20606	Sstr2	somatostatin receptor 2
240725	Sulf1	sulfatase 1
320558	Sycp2	synaptonemal complex protein 2
433485	Syndig1	synapse differentiation inducing 1
72003	Synpr	synaptoporin
20979	Syt1	synaptotagmin I
21413	Tcf4	transcription factor 4
230661	Tesk2	testis-specific kinase 2
226896	Tfap2d	transcription factor AP-2, delta
21808	Tgfb2	transforming growth factor, beta 2
21825	Thbs1	thrombospondin 1
320709	Tmem117	transmembrane protein 117
623230	Tmem200b	transmembrane protein 200B
327766	Tmem26	transmembrane protein 26
21983	Tpbg	trophoblast glycoprotein
50500	Ttpa	tocopherol (alpha) transfer protein
208898	Unc13c	unc-13 homolog C (C. elegans)
229658	Vangl1	VANGL planar cell polarity 1
22637	Zap70	zeta-chain (TCR) associated protein kinase
